# Supplementary material for: Heat tolerance and thermal scope are evolutionarily constrained in Greenlandic terrestrial arthropods
Source: Research Square preprint supplement (doi:10.21203/rs.3.rs-5640068/v1), 2024-12-23

| ***Species*** | ***Order*** | ***Count*** | ***CTMax (Median + SE) (˚C)*** | ***CTmin (Median + SE) (˚C)*** | ***Scope (Median + SE) (˚C)*** | ***Length (Median + SE) (mm)*** |
| --- | --- | --- | --- | --- | --- | --- |
| *[Araneae sp.](#_Araneae_sp.)* | [Araneae](#_Araneae) | **2** | **40.4 ± 5.4** | **--** | **--** | **4.85 ± 0.35** |
| [*Araneus groenlandica*](#_Araneus_groenlandica) | [Araneae](#_Araneae) | **1** | **--** | **- 6.2** | **--** | **3.3** |
| [*Dictyna major*](#_Dictyna_major) | [Araneae](#_Araneae) | **11** | **49.05 ± 0.26** | **- 5.11 ± 0.34** | **54.39 ± 0.68** | **2.1 ± 0.2** |
| [*Emblyna borealis*](#_Emblyna_borealis) | [Araneae](#_Araneae) | **5** | **51.21 ± 0.09** | **- 0.62 ± 0.73** | **51.83 ± 0.52** | **1.2 ± 0.1** |
| [*Haplodrassus signifer*](#_Haplodrassus_signifier) | [Araneae](#_Araneae) | **1** | **44.31** | **--** | **--** | **8.5** |
| [*Ohlertidion sp*](#_Ohlertidion_ohlerti)*.* | [Araneae](#_Araneae) | **1** | **47.13** | **--** | **--** | **2.8** |
| [*Pardosa furcifera*](#_Pardosa__furcifera) | [Araneae](#_Araneae) | **3** | **46.21** | **- 6.05 ± 0.15** | **52.26 ± 0.10** | **8.0 ± 0.60** |
| [*Pardosa groenlandica*](#_Pardosa_groenlandica) | [Araneae](#_Araneae) | **4** | **47.09 ± 0.04** | **- 1.86** | **48.95 ± 0.05** | **9.65 ± 0.74** |
| [*Tetragnatha extensa*](#_Tetragnatha_extensa) | [Araneae](#_Araneae) | **1** | **43.79** | **--** | **--** | **8.5** |
| [*Theridion ohlerti*](#_Theridion_ohlerti) | [Araneae](#_Araneae) | **1** | **--** | **- 5.82** | **--** | **2.5** |
| [*Xysticus sp.*](#_Xysticus_nigromaculatus) | [Araneae](#_Araneae) | **27** | **49.08 ± 0.25** | **- 4.0 ± 0.41** | **53.08 ± 0.54** | **3.45 ± 0.27** |
| *[Lamyctes emarginatus](#_Lamyctes_emarginatus)* | [Chilopoda](#_Chilopoda) | **1** | **42.03** | **--** | **--** | **6.5** |
| [*Lamyctes sp.*](#_Lamyctes_sp.) | [Chilopoda](#_Chilopoda) | **2** | **42.8 ± 0.44** | **--** | **--** | **6.1 ± 0.4** |
| [*Bembidion grapii*](#_Bembidion_grapii) | [Coleoptera](#_Coleoptera) | **3** | **40.97 ± 0.02** | **--** | **--** | **4.2 ± 0.12** |
| [*Byrrhus fasciatus*](#_Byrrhus_fasciatus) | [Coleoptera](#_Coleoptera) | **1** | **45.02** | **--** | **--** | **7.0** |
| *[Coccinella](#_Coccinella_transversoguttata)*  *[transversoguttata](#_Coccinella_transversoguttata)* | [Coleoptera](#_Coleoptera) | **4** | **49.3 ± 0.13** | **-3.16 ± 0.12** | **52.45 ± 0.12** | **5.55 ± 0.26** |
| [*Gyrinus opacus*](#_Gyrinus_opacus) | [Coleoptera](#_Coleoptera) | **3** | **37.23 ± 0.2** | **--** | **--** | **6.0 ± 0.37** |
| *Hydrophorus*  *morio** | [Coleoptera](#_Coleoptera) | **1** | **38.71** | **--** | **--** | **3.8** |
| [*Nebria rufescens*](#_Nebria_rufescens) | [Coleoptera](#_Coleoptera) | **3** | **38.31 + 0.0** | **--** | **--** | **5.50 ± 0.17** |
| *[Otiorhynchus](#_Otiorhynchus_arcticus)*  *[arcticus](#_Otiorhynchus_arcticus)* | [Coleoptera](#_Coleoptera) | **2** | **45.04 ± 0.0** | **--** | **--** | **6.55 ± 0.45** |
| *[Otiorhynchus](#_Otiorhynchus_nodosus)*  *[nodosus](#_Otiorhynchus_nodosus)* | [Coleoptera](#_Coleoptera) | **3** | **42.18 ± 0.0** | **3.79** | **38.39 ± 0.0** | **8.0 ± 0.17** |
| [*Patrobus septentrionis*](#_Patrobus_septentrionis) | [Coleoptera](#_Coleoptera) | ***2*** | ***41.27 ± 1.2*** | ***--*** | ***--*** | ***8.5 ± 0.5*** |
| *[Botanophila profuga](#_Botanophila_profuga)* | [Diptera](#_Diptera) | ***9*** | ***41.23 ± 0.1*** | ***-4.56 ± 0.07*** | ***45.79 ± 0.11*** | ***5.4 ± 0.22*** |
| [*Botanophila sp.*](#_Botanophila_sp.) | [Diptera](#_Diptera) | ***9*** | ***41.11 ± 0.38*** | ***-2.52 ± 1.52*** | ***43.63 ± 2.15*** | ***4.95 ± 0.13*** |
| [*Bradysia sp.*](#_Bradysia_flavipila) | [Diptera](#_Diptera) | ***1*** |  | ***-3.63*** |  | ***1.2*** |
| [*Calliphora uralensis*](#_Calliphora_uralensis) | [Diptera](#_Diptera) | ***2*** | ***26.12 ± 3.85*** |  |  | ***13.5 ± 0.5*** |
| *[Delia echinata](#_Delia_echinata)* | [Diptera](#_Diptera) | ***2*** | ***43.14*** | ***-6.01*** | ***49.15 ± 0.00*** | ***4.45 ± 0.05*** |
| [*Delia fabricii*](#_Delia_fabricii) | [Diptera](#_Diptera) | ***33*** | ***42.92 ± 0.14*** | ***-3.18 ± 0.52*** | ***46.12 ± 0.52*** | ***6.20 ± 0.13*** |
| [*Delia platura*](#_Delia_platura) | [Diptera](#_Diptera) | ***1*** | ***22.78*** | ***--*** | ***--*** | ***4.20*** |
| *[Dolichopus](#_Dolichopus_groenlandicus)*  *[groenlandicus](#_Dolichopus_groenlandicus)* | [Diptera](#_Diptera) | ***1*** | ***--*** | ***-1.00*** | ***--*** | ***5.10*** |
| [*Dolichopus plumipes*](#_Dolichopus_plumipes) | [Diptera](#_Diptera) | ***1*** | ***--*** | ***-4.63*** | ***--*** | ***5.30*** |
| [*Eupeodes sp.*](#_Eupeodes_luniger) | [Diptera](#_Diptera) | ***1*** | ***32.75*** | ***--*** | ***--*** | ***9.50*** |
| [*Exechia sp.*](#_Exechia_borealis) | [Diptera](#_Diptera) | ***1*** | ***35.57*** | ***--*** | ***--*** | ***4.0*** |
| [*Fannia*](#_Fannia_monilis)*sp.* | [Diptera](#_Diptera) | ***1*** | ***42.70*** | ***--*** | ***--*** | ***4.0*** |
| [*Forcipomyia sp.*](#_Forcipomyia_sphagnophila) | [Diptera](#_Diptera) | ***1*** | ***35.23*** | ***--*** | ***--*** | ***2.1*** |
| *[Halocladius](#_Halocladius_variabilis)*  *[variabilis](#_Halocladius_variabilis)* | [Diptera](#_Diptera) | ***3*** | ***37.10 ± 1.74*** | ***--*** | ***--*** | ***3.1 ± 0.33*** |
| *[Hydrobaenus](#_Hydrobaenus_fusistylus)*  *[fusistylus](#_Hydrobaenus_fusistylus)* | [Diptera](#_Diptera) | ***1*** | ***--*** | ***-3.96*** | ***--*** | ***3.0*** |
| [*Macrocera sp.*](#_Macrocera_sp.) | [Diptera](#_Diptera) | ***1*** | ***34.10*** | ***--*** | ***--*** | ***4.7*** |
| *[Muscidae sp.](#_Melanostoma_mellinum)* | [Diptera](#_Diptera) | ***16*** | ***38.82 ± 0.22*** | ***- 1.47 ± 2.91*** | ***40.29 ± 4.47*** | ***5.0 ± 0.20*** |
| [*Mycetophila sp.*](#_Mycetophila_perpallida) | [Diptera](#_Diptera) | ***1*** | ***35.18*** | ***--*** | ***--*** | ***4.7*** |
| [*Pegomya notabilis*](#_Pegomya_notabilis) | [Diptera](#_Diptera) | ***2*** | ***--*** | ***-2.24 ± 0.26*** | ***--*** | ***6.75 ± 0.75*** |
| [*Pegomya sp.*](#_Pegomya_sp.) | [Diptera](#_Diptera) | ***4*** | ***37.40*** | ***-1.36 ± 0.44*** | ***38.76 ± 0.56*** | ***5.40 ± 0.27*** |
| [*Pegomya zonata*](#_Pegomya_zonata) | [Diptera](#_Diptera) | ***1*** | ***--*** | ***-2.43*** | ***--*** | ***5.80*** |
| *[Protophormia](#_Protophormia_terranovae)*  *[terranovae](#_Protophormia_terranovae)* | [Diptera](#_Diptera) | ***6*** | ***34.81 ± 1.08*** | ***-1.37 ± 1.1*** | ***36.18 ± 1.43*** | ***10.00 ± 1.08*** |
| [*Scathophaga litorea*](#_Scathophaga_litorea) | [Diptera](#_Diptera) | ***1*** | ***40.12*** | ***--*** | ***--*** | ***7.0*** |
| [*Scathophaga sp.*](#_Scathophaga_sp.) | [Diptera](#_Diptera) | ***2*** | ***38.82 ± 0.06*** | ***--*** | ***--*** | ***6.4 ± 0.6*** |
| [*Scathophagidae sp.*](#_Scathophagidae_sp.) | [Diptera](#_Diptera) | ***2*** | ***37.96*** | ***-5.81*** | ***43.77 ± 0.00*** | ***5.4 ± 0.6*** |
| [*Sciaridae sp.*](#_Sciaridae_sp.) | [Diptera](#_Diptera) | ***2*** | ***37.09 ± 0.07*** | ***--*** | ***--*** | ***2.05 ± 0.05*** |
| [*Simulium sp.*](#_Simulium_sp.) | [Diptera](#_Diptera) | ***5*** | ***42.33 ± 0.39*** | ***--*** | ***--*** | ***2.70 ± 0.09*** |
| [*Simulium vittatum*](#_Simulium_vittatum) | [Diptera](#_Diptera) | ***2*** | ***42.03 ± 0.26*** | ***--*** | ***--*** | ***2.55 ± 0.25*** |
| [*Sphaerophoria sp.*](#_Sphaerophoria_philanthus) | [Diptera](#_Diptera) | ***1*** | ***--*** | ***-2.42*** | ***--*** | ***10.0*** |
| [*Spilogona arctica*](#_Spilogona_arctica) | [Diptera](#_Diptera) | ***3*** | ***33.75*** | ***-3.71 ± 0.12*** | ***37.46 ± 0.08*** | ***5.50 ± 0.54*** |
| [*Spilogona*](#_Spilogona_pacifica)*sp.* | [Diptera](#_Diptera) | ***1*** | ***40.41 ± 0.11*** | ***--*** | ***--*** | ***5.30 ± 1.00*** |
| [*Syrphidae sp.*](#_Melanostoma_mellinum) | [Diptera](#_Diptera) | ***4*** | ***41.94 ± 0.63*** | ***7.55*** | ***34.39 ± 0.8*** | ***7.50 ± 0.29*** |
| [*Tachina ampliforceps*](#_Tachina_ampliforceps) | [Diptera](#_Diptera) | ***2*** | ***43.43 ± 0.44*** | ***--*** | ***--*** | ***16.0 ± 3.0*** |
| [*Lepidocyrtus sp.*](#_Lepidocyrtus_lanuginosus) | [Entomobryomorpha](#_Entomobryomorpha) | ***1*** | ***--*** | ***-5.52*** | ***--*** | ***1.50*** |
| [*Aphididae sp.*](#_Aphididae_sp.) | [Hemiptera](#_Hemiptera) | ***2*** | ***43.11*** | ***0.67*** | ***42.44 ± 0.00*** | ***1.75 ± 0.25*** |
| [*Cavariella sp.*](#_Cavariella_angelica) | [Hemiptera](#_Hemiptera) | ***4*** | ***40.33 ± 0.05*** | ***--*** | ***--*** | ***1.50 ± 0.15*** |
| *[Euceraphis](#_Euceraphis_punctipennis)*  *[punctipennis](#_Euceraphis_punctipennis)* | [Hemiptera](#_Hemiptera) | ***7*** | ***40.96*** | ***-3.41 ± 0.28*** | ***44.37 ± 0.49*** | ***2.80 ± 0.18*** |
| [*Euceraphis sp.*](#_Euceraphis_sp) | [Hemiptera](#_Hemiptera) | ***1*** | ***--*** | ***-2.89*** | ***--*** | ***3.90*** |
| *[Myzodium](#_Myzodium_modestum)*  *[modestum](#_Myzodium_modestum)* | [Hemiptera](#_Hemiptera) | ***1*** | ***--*** | ***- 2.65*** | ***--*** | ***1.70*** |
| *[Nabis](#_Nabis_flavomarginatus)*  *[flavomarginatus](#_Nabis_flavomarginatus)* | [Hemiptera](#_Hemiptera) | ***41*** | ***45.07 ± 0.2*** | ***-4.72 ± 0.14*** | ***49.80 ± 0.32*** | ***8.0 ± 0.09*** |
| *[Nysius](#_Nysius_groenlandicus)*  *[groenlandicus](#_Nysius_groenlandicus)* | [Hemiptera](#_Hemiptera) | ***50*** | ***49.62 ± 0.09*** | ***-2.14 ± 0.22*** | ***51.82 ± 0.33*** | ***3.90 ± 0.05*** |
| *[Psammotettix](#_Psammotettix_lividellus)*  *[lividellus](#_Psammotettix_lividellus)* | [Hemiptera](#_Hemiptera) | ***14*** | ***48.19 ± 0.18*** | ***-4.28 ± 0.38*** | ***52.45 ± 0.45*** | ***3.30 ± 0.1*** |
| [*Psyllidae sp.*](#_Psyllidae_sp.) | [Hemiptera](#_Hemiptera) | ***10*** | ***42.36 ± 0.28*** | ***-2.71*** | ***45.07 ± 0.26*** | ***1.80 ± 0.11*** |
| [*Pterocomma sp.*](#_Pterocomma_beulahense) | [Hemiptera](#_Hemiptera) | ***1*** | ***--*** | ***-2.27*** | ***--*** | ***2.30*** |
| [*Utamphorophora sp.*](#_Utamphorophora_sp.) | [Hemiptera](#_Hemiptera) | ***1*** | ***--*** | ***-3.02*** | ***--*** | ***2.0*** |
| [*Brachonidae sp.*](#_Utamphorophora_sp.) | [Hymenoptera](#_Hymenoptera_1) | ***1*** | ***--*** | ***-1.23*** | ***--*** | ***2.50*** |
| *[Campoletis](#_Campoletis_horstmanni)*  *[horstmanni](#_Campoletis_horstmanni)* | [Hymenoptera](#_Hymenoptera_1) | ***1*** | ***--*** | ***-5.81*** | ***--*** | ***6.5*** |
| [*Campopleginae sp.*](#_Campopleginae_sp.) | [Hymenoptera](#_Hymenoptera_1) | ***3*** | ***43.37*** | ***5.12 ± 1.09*** | ***48.49 ± 0.77*** | ***5.0 ± 0.52*** |
| [*Hymenoptera sp.*](#_Hymenoptera_sp.) | [Hymenoptera](#_Hymenoptera_1) | ***1*** | ***42.84*** | ***--*** | ***--*** | ***2.5*** |
| [*Hyposoter frigidus*](#_Hyposoter_frigidus) | [Hymenoptera](#_Hymenoptera_1) | ***2*** | ***--*** | ***-4.45 ± 0.57*** | ***--*** | ***6.05 ± 0.25*** |
| [*Hyposoter sp.*](#_Hyposoter_sp.) | [Hymenoptera](#_Hymenoptera_1) | ***1*** | ***--*** | ***-5.05*** | ***--*** | ***9.0*** |
| *[Ichneumon](#_Ichneumon_sarcitorius)*  *[sarcitorius](#_Ichneumon_sarcitorius)* | [Hymenoptera](#_Hymenoptera_1) | ***9*** | ***43.80 ± 0.06*** | ***-4.37 ± 0.70*** | ***48.17 ±0.85*** | ***12.0 ± 0.17*** |
| [*Ichneumonidae sp.*](#_Ichneumonidae_sp.) | [Hymenoptera](#_Hymenoptera_1) | ***5*** | ***45.91 ± 0.61*** | ***-3.81 ± 0.47*** | ***42.11 ± 0.25*** | ***5.0 ± 0.1*** |
| [*Meteorus rubens*](#_Meteorus_rubens) | [Hymenoptera](#_Hymenoptera_1) | ***1*** | ***--*** | ***-4.71*** | ***--*** | ***4.0*** |
| *[Pantisarthrus](#_Panthisarthrus_lubricus_1)*  *[lubricus](#_Panthisarthrus_lubricus_1)* | [Hymenoptera](#_Hymenoptera_1) | ***1*** | ***--*** | ***-2.30*** | ***--*** | ***4.50*** |
| *[Protapanteles](#_Protopanatales_fulvipes_1)*  *[fulvipes](#_Protopanatales_fulvipes_1)* | [Hymenoptera](#_Hymenoptera_1) | ***2*** | ***40.44*** | ***-3.87*** | ***44.31 ± 0.00*** | ***3.60 ± 0.40*** |
| [*Tenthredinidae sp.*](#_Pristiphora_laricis) | [Hymenoptera](#_Hymenoptera_1) | ***8*** | ***43.69 ± 0.33*** | ***- 4.69*** | ***48.38 ± 0.53*** | ***4.70 ± 0.46*** |
| [*Acleris caryosphena*](#_Acleris_caryosphena) | [Lepidoptera](#_Lepidoptera_1) | ***1*** | ***42.88*** | ***--*** | ***--*** | ***7.0*** |
| [*Autographa gamma*](#_Autographa_gamma) | [Lepidoptera](#_Lepidoptera_1) | ***2*** | ***46.06*** | ***-0.30*** | ***46.36 ± 0.00*** | ***15.50*** |
| [*Eurois occulta*](#_Eurois_occulta) | [Lepidoptera](#_Lepidoptera_1) | ***9*** | ***43.51 ± 0.30*** | ***-5.43 ± 0.1*** | ***48.94 ± 0.58*** | ***4.80 ± 0.57*** |
| [*Mniotype adusta*](#_Mniotype_adusta) | [Lepidoptera](#_Lepidoptera_1) | ***4*** | ***43.60 ± 0.48*** | ***0.58*** | ***43.02 ± 0.61*** | ***12.00 ± 1.68*** |
| [*Scythris noricella*](#_Scythris_noricella) | [Lepidoptera](#_Lepidoptera_1) | ***2*** | ***41.55 ± 8.9*** | ***--*** | ***--*** | ***6.10 ± 0.1*** |
| [*Spaelotis clandestina*](#_Spaelotis_clandestine) | [Lepidoptera](#_Lepidoptera_1) | ***1*** | ***46.09*** | ***--*** | ***--*** | ***18.0*** |
| [*Syngrapha borea*](#_Syngrapha_borea) | [Lepidoptera](#_Lepidoptera_1) | ***1*** | ***45.17*** | ***--*** | ***--*** | ***3.60*** |
| [*Tortricidae sp.*](#_Eana_osseana) | [Lepidoptera](#_Lepidoptera_1) | ***44*** | ***43.73 ± 0.29*** | ***-4.38 ± 0.27*** | ***48.13 ± 0.47*** | ***7.0 ± 0.13*** |
| [*Hemerobius ovalis*](#_Hemerobius_ovalis) | [Neuroptera](#_Neuroptera) | ***1*** | ***42.29*** | ***--*** | ***--*** | ***5.80*** |
| [*Wesmaelius nervosus*](#_Wesmaelius_nervosus) | [Neuroptera](#_Neuroptera) | ***1*** | ***--*** | ***-4.82*** | ***--*** | ***4.70*** |
| [*Limnephilus kennicotti*](#_Limnephilus_kennicotti) | [Trichoptera](#_Trichoptera) | ***1*** | ***--*** | ***-5.27*** | ***--*** | ***7.0*** |
| [*Limnephilus sp.*](#_Limnephilus_picturatus) | [Trichoptera](#_Trichoptera) | ***2*** | ***--*** | ***-4.3 ± 0.11*** | ***--*** | ***10.0 ± 0.0*** |
| [*Anystidae sp.*](#_Anystidae_sp.) | [Trombidiformes](#_Trombidiformes) | ***4*** | ***40.22*** | ***-2.34 ± 0.42*** | ***42.56 ± 0.55*** | ***1.15 ± 0.05*** |

Appendix 2. Table S1: CTmax, CTmin, thermal scope and length measures of all species of which at least one measure of thermal limit was recorded. Asterisk indicate species of which image was not obtained. No SE is noted for single measures.

# Araneae

## Araneae sp.


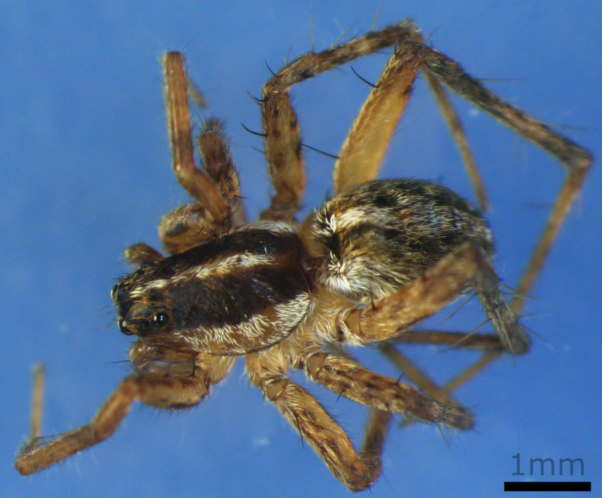


## Araneus groenlandica


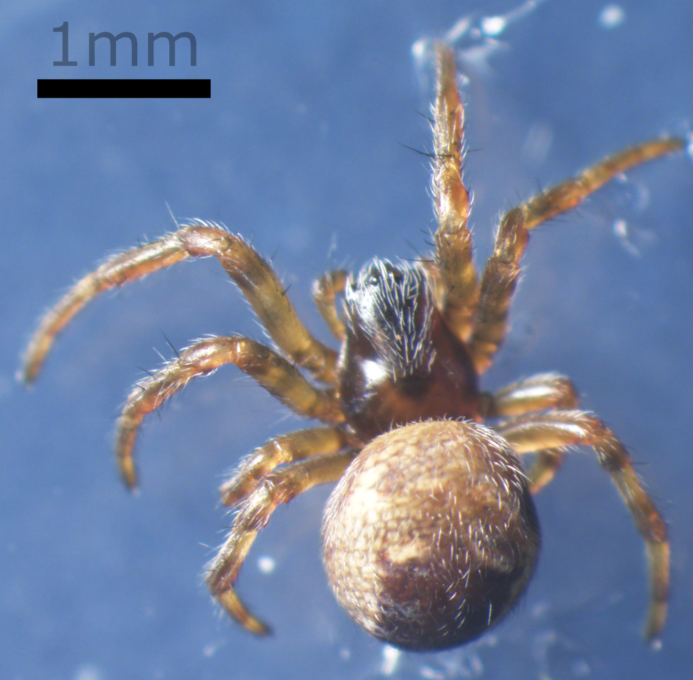


## Dictyna major


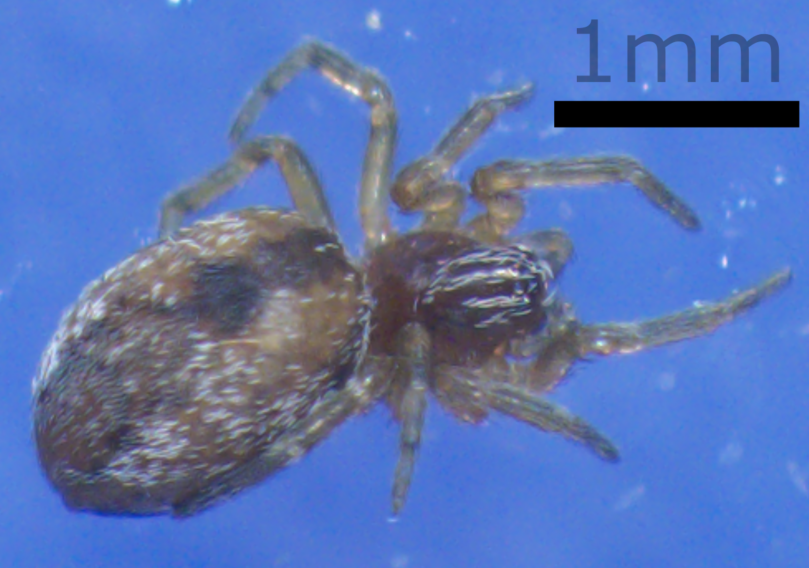


## Emblyna borealis


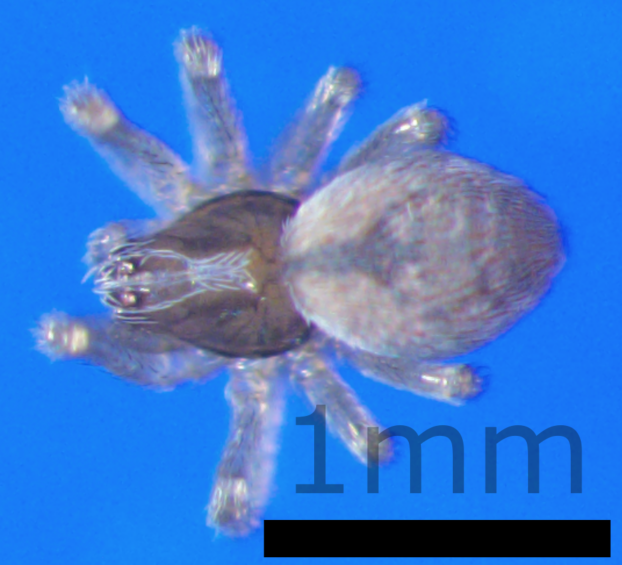


## Haplodrassus signifier


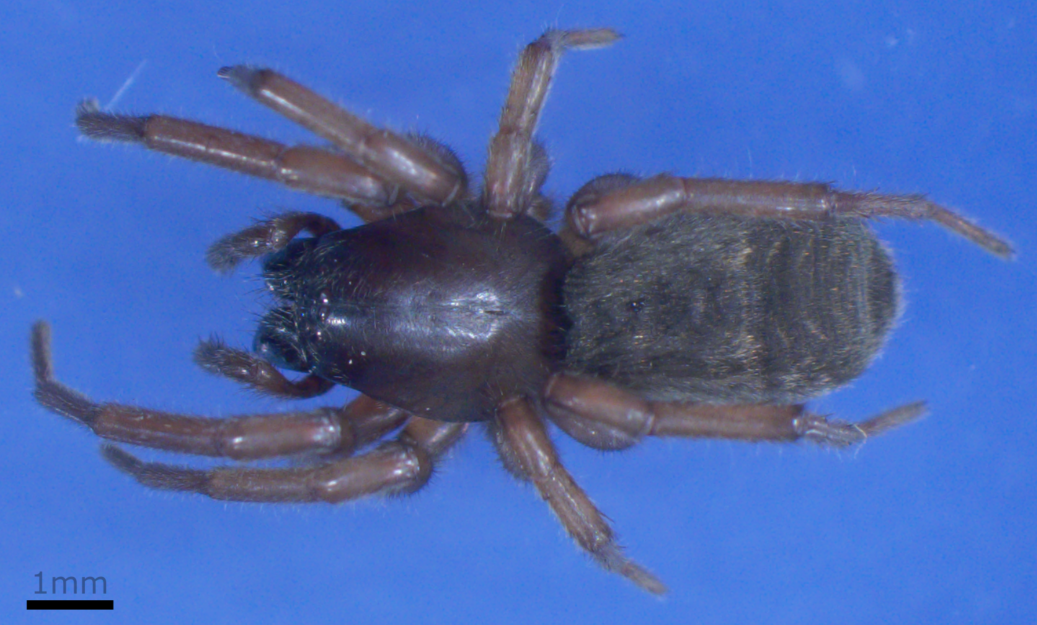


## Ohlertidion sp.


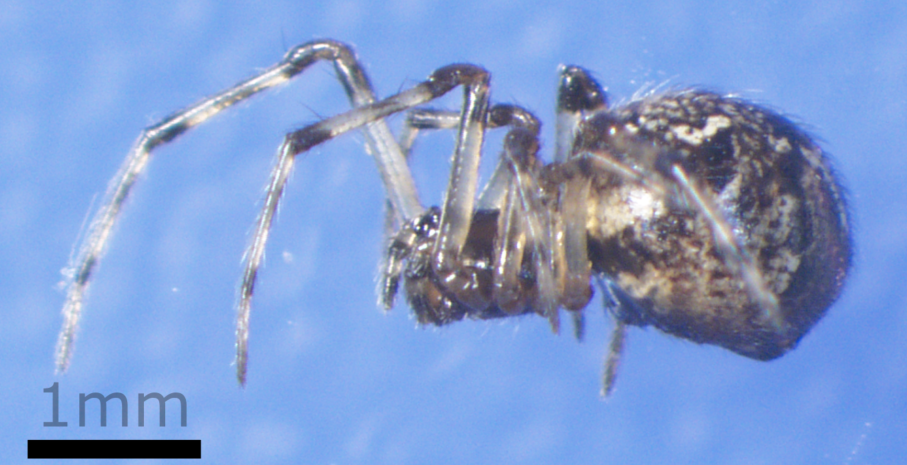


## Pardosa furcifera


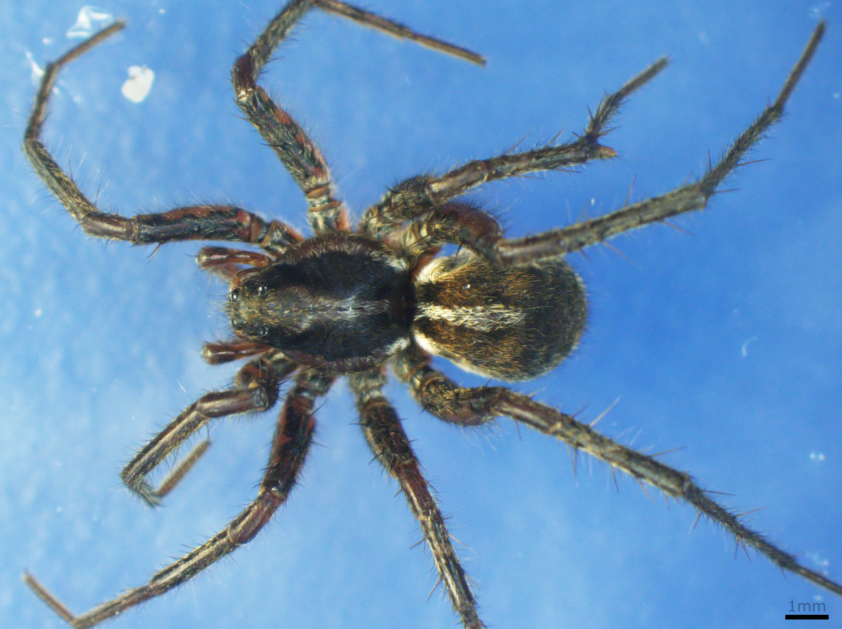


## Pardosa groenlandica


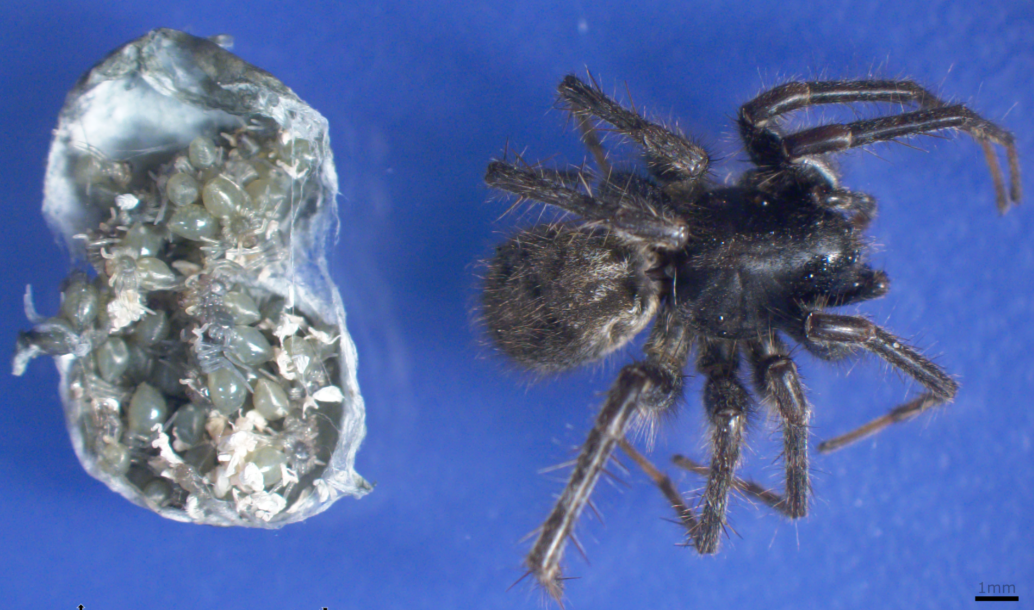


## Tetragnatha extensa


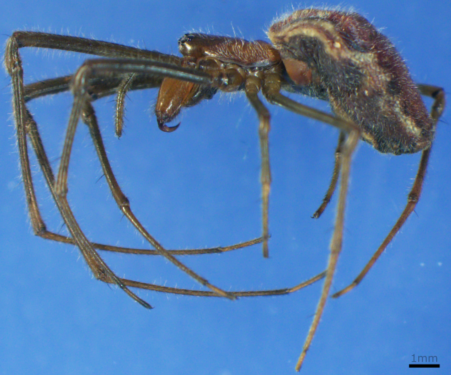


## Theridion ohlerti


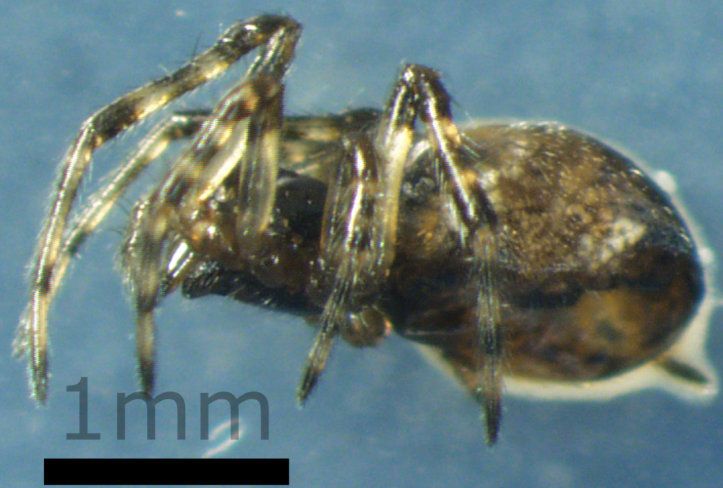


## Xysticus sp.

##
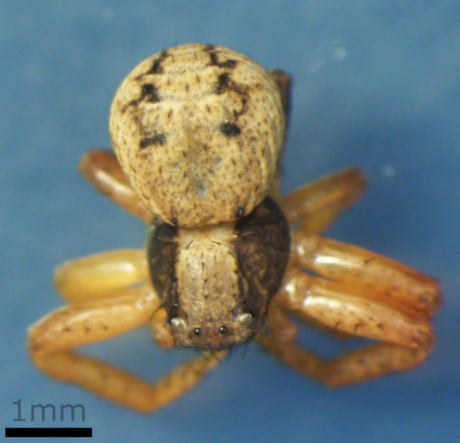


# Chilopoda

## Lamyctes emarginatus


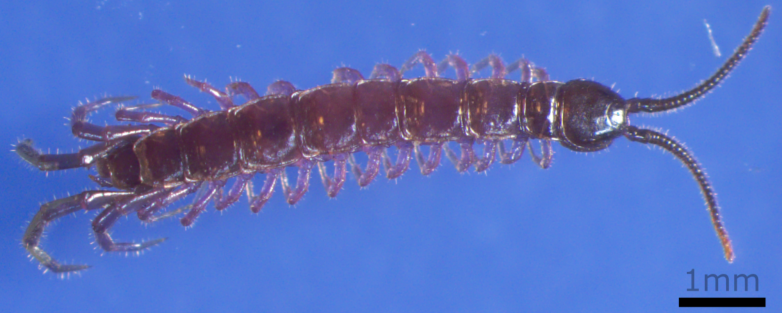


## Lamyctes sp.


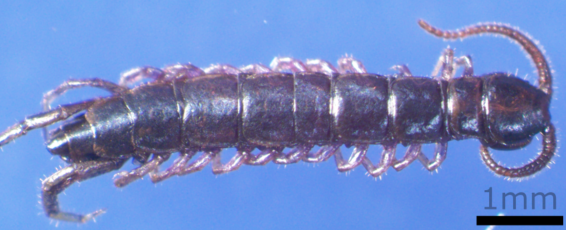


# Coleoptera

## Bembidion grapii


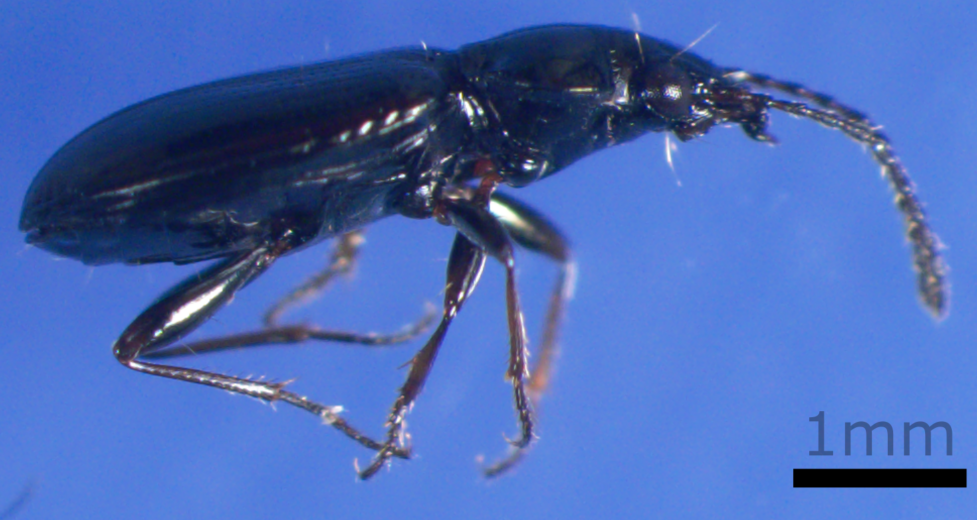


## Byrrhus fasciatus


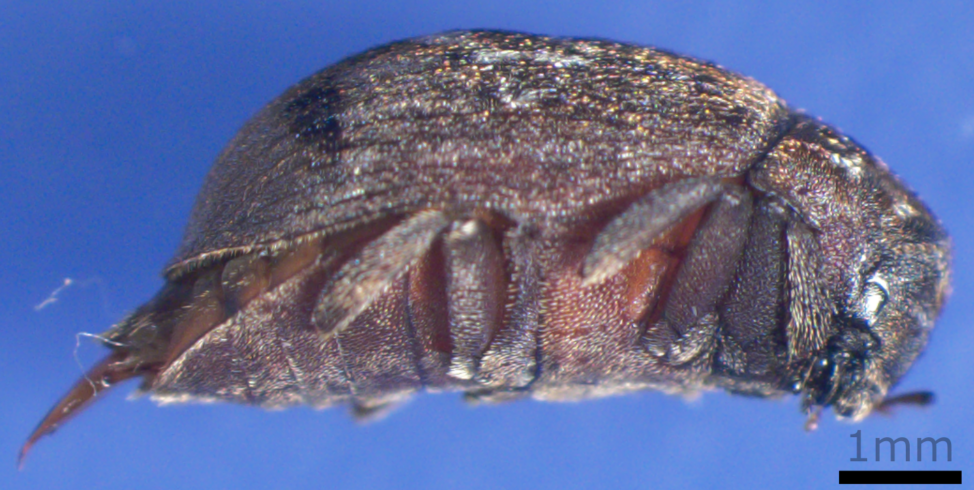


## Coccinella transversoguttata


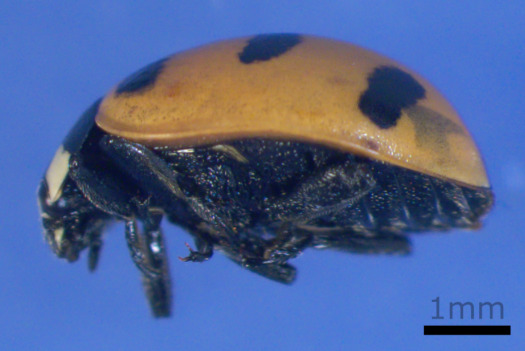


## Gyrinus opacus


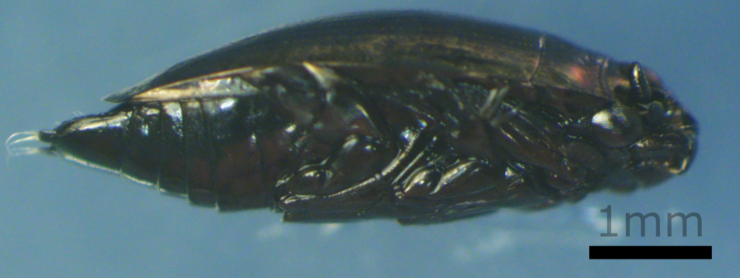


## Hydrophorus morio

No image was captured.

## Nebria rufescens


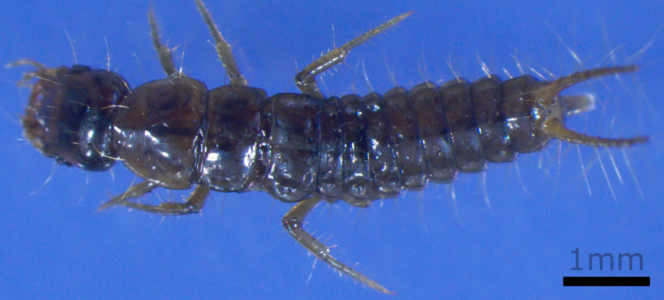


## Otiorhynchus arcticus


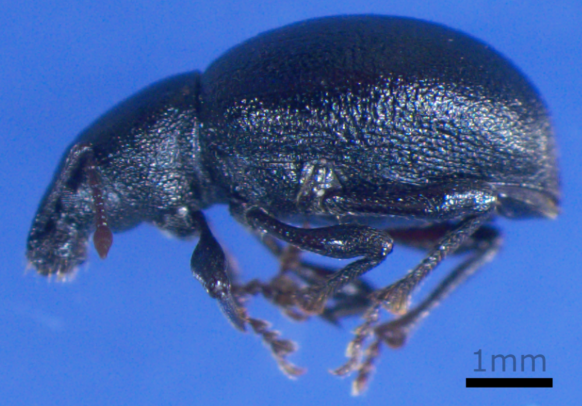


## Otiorhynchus nodosus


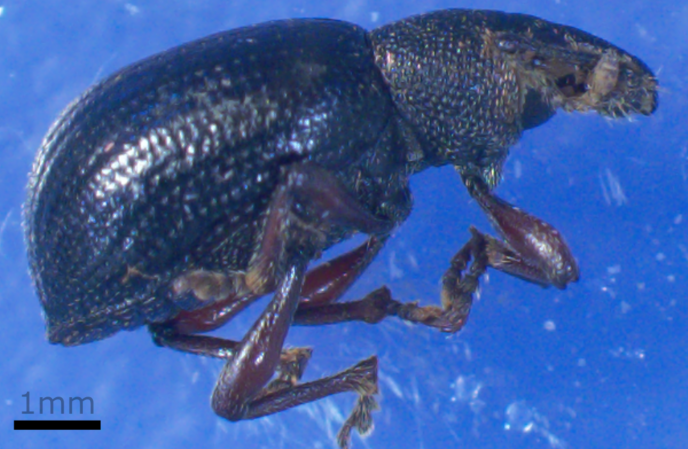


## Patrobus septentrionis

##
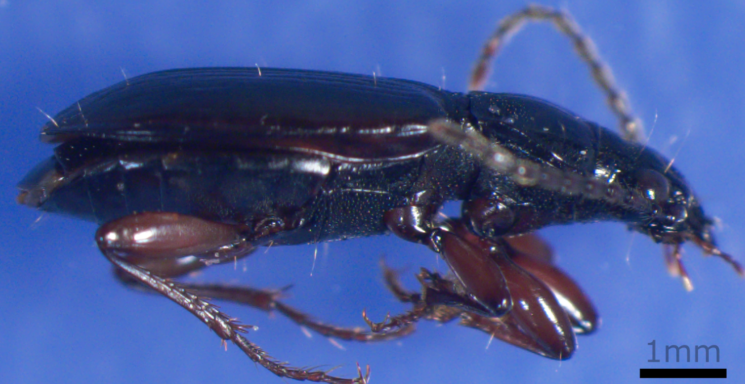


# Diptera

## Botanophila profuga


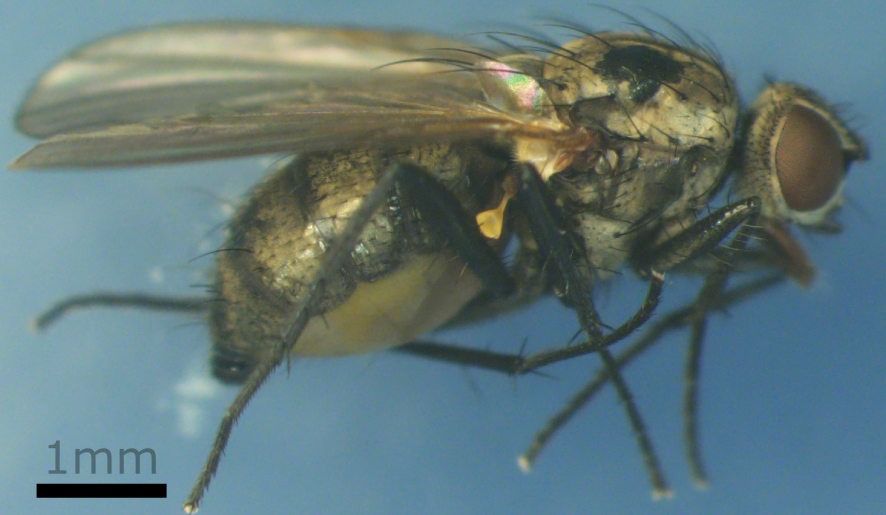


## Botanophila sp.


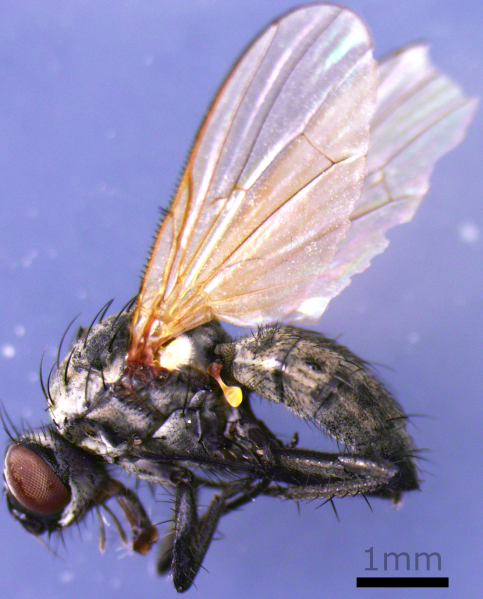


## Bradysia sp.


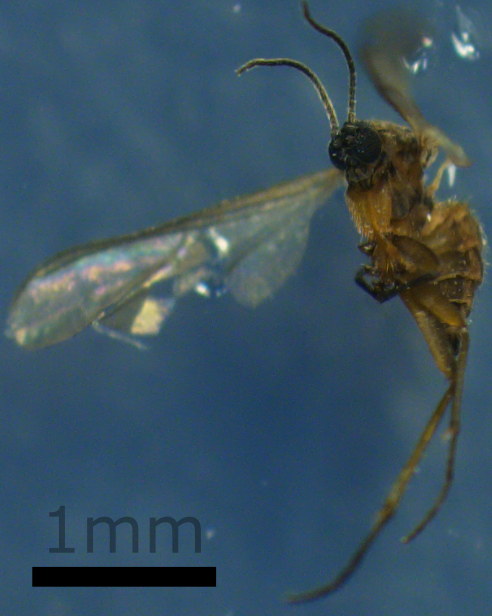


## Calliphora uralensis
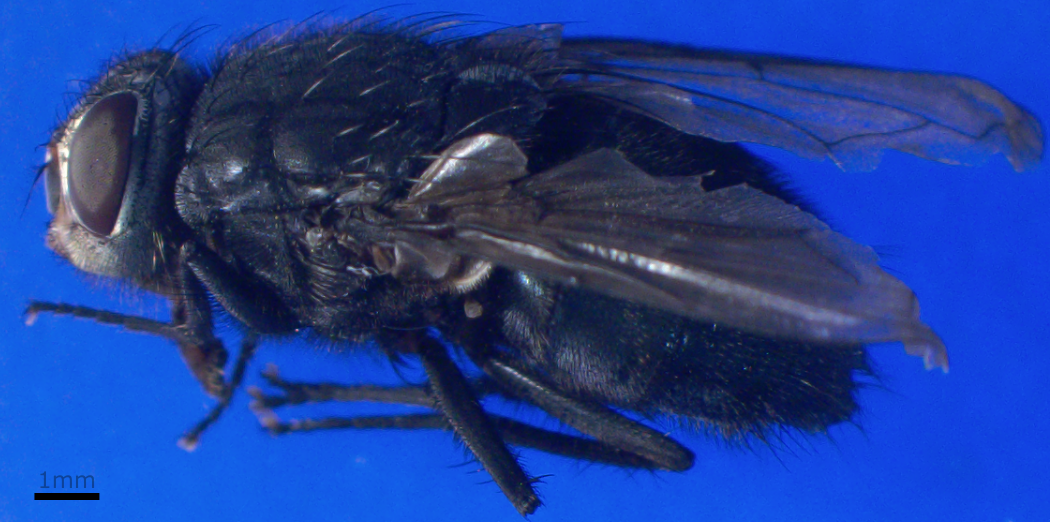


## Delia echinata


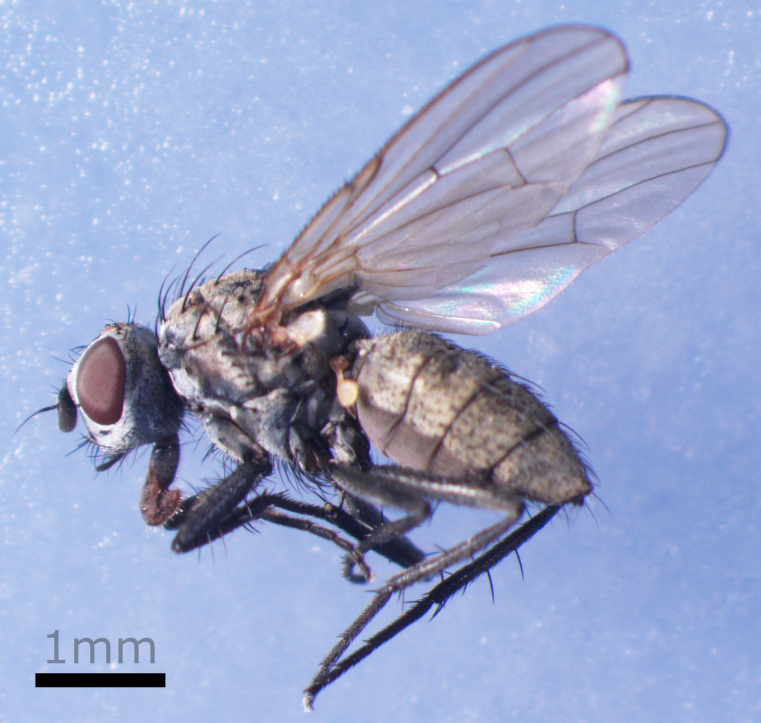


## Delia fabricii


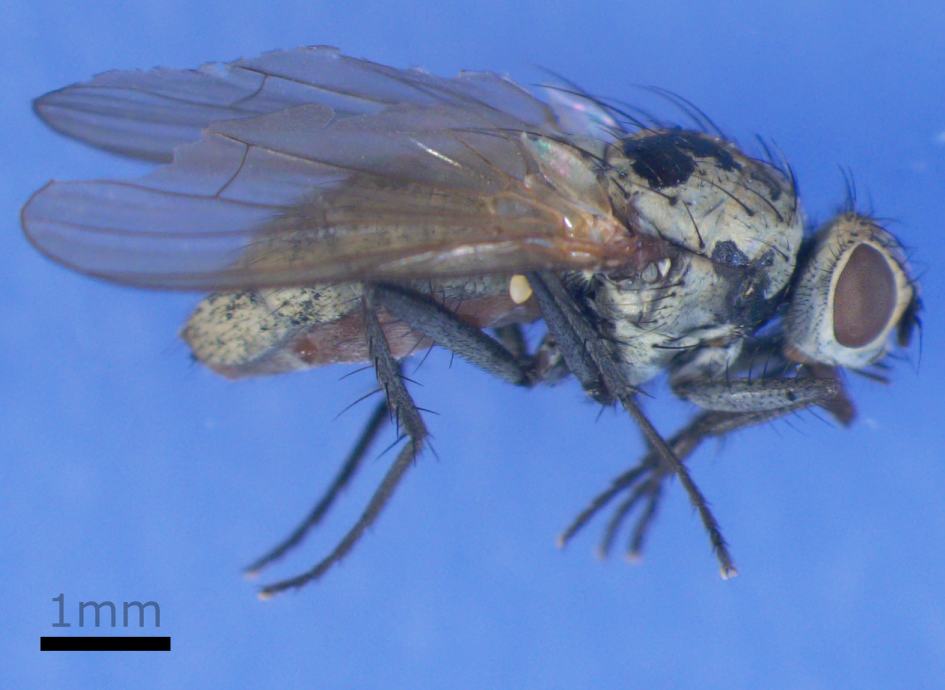


## Delia platura


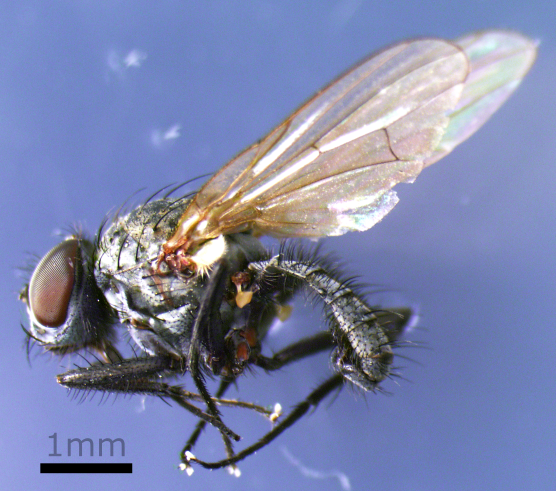


## Dolichopus groenlandicus


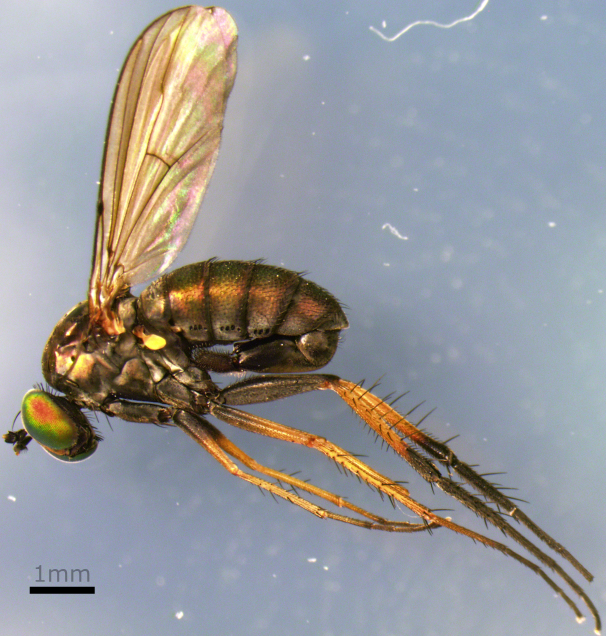


## Dolichopus plumipes


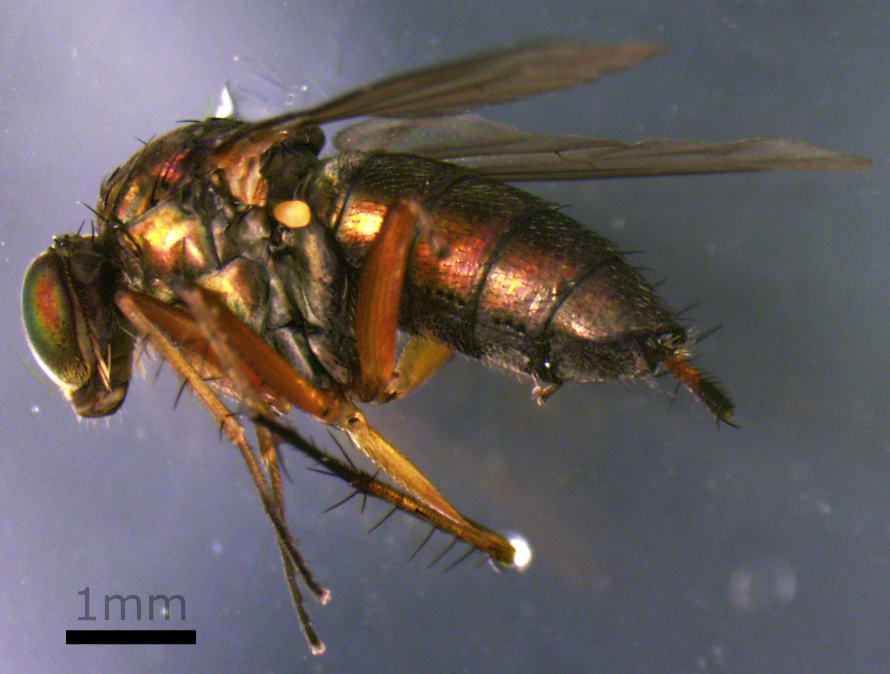


## Eupeodes sp.


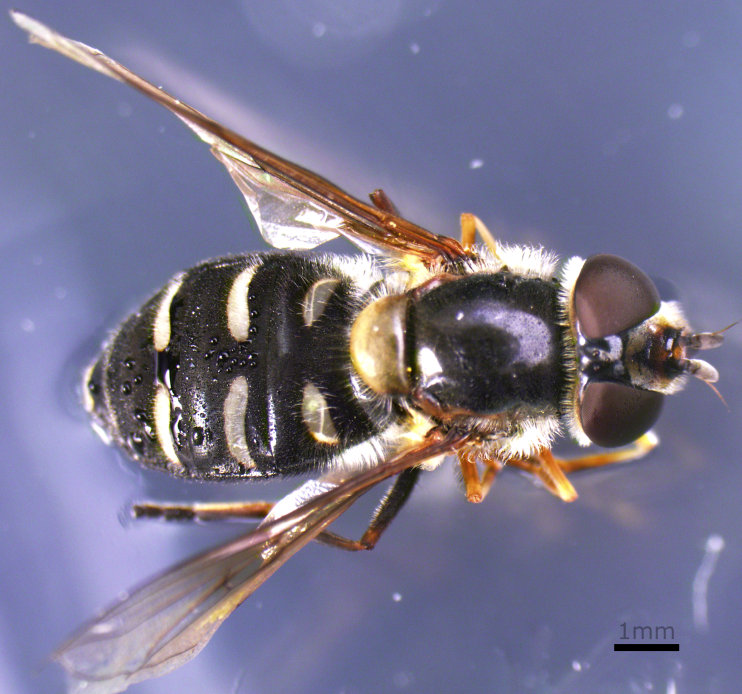


## Exechia sp.


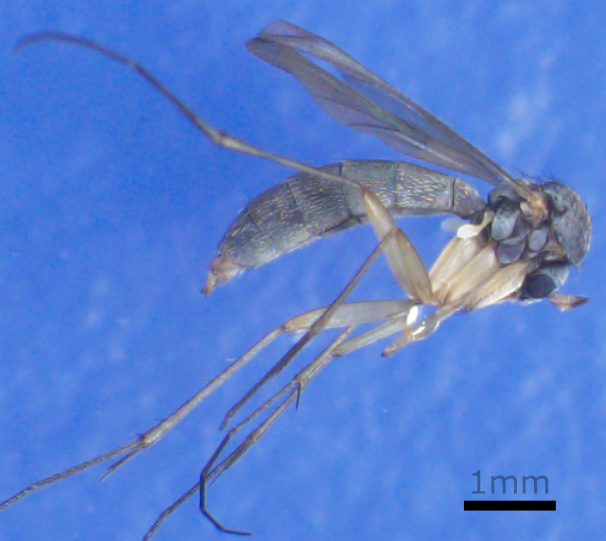


## Fannia sp.


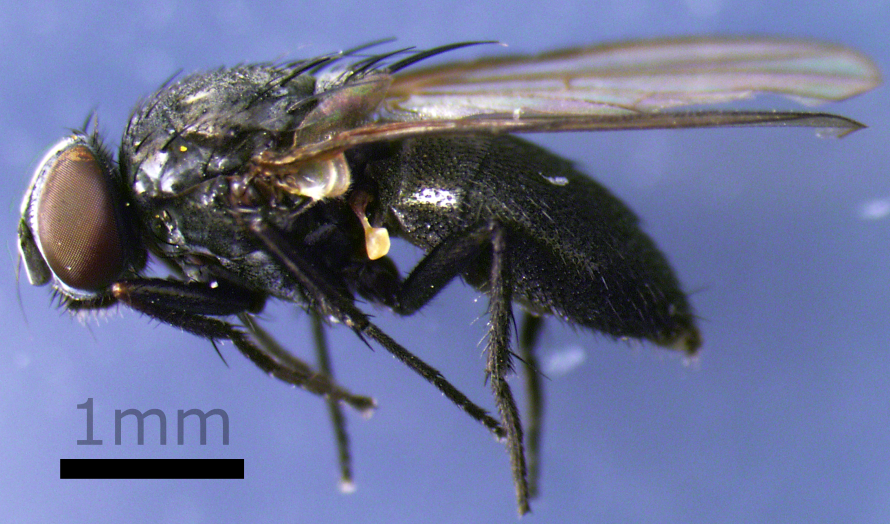


## Forcipomyia sp.


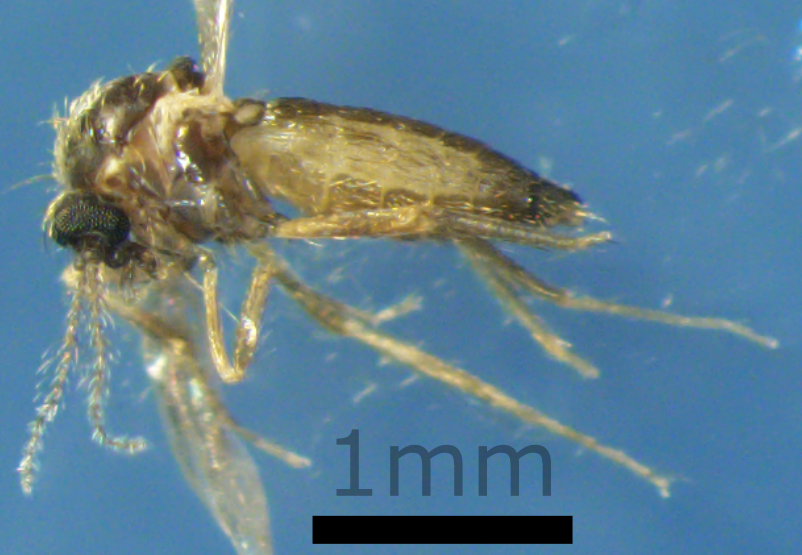


## Halocladius variabilis


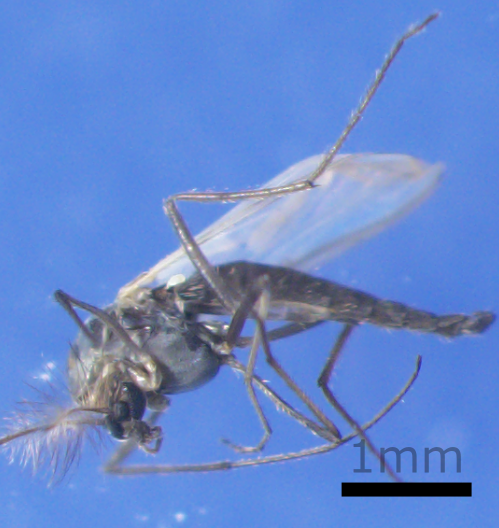


## Hydrobaenus fusistylus


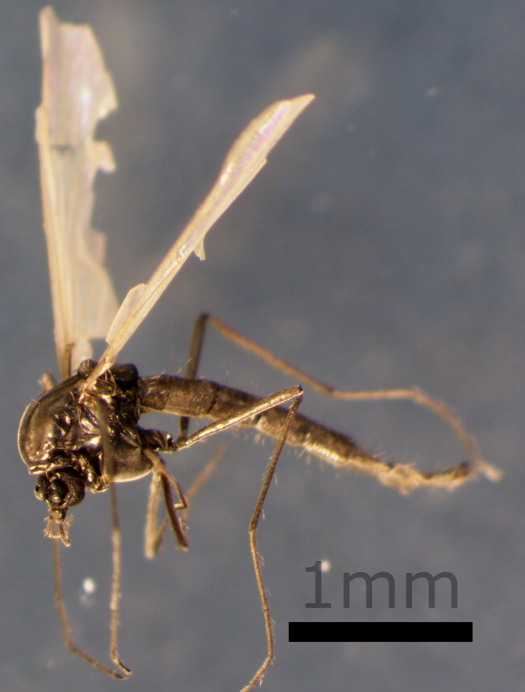


## Macrocera sp.


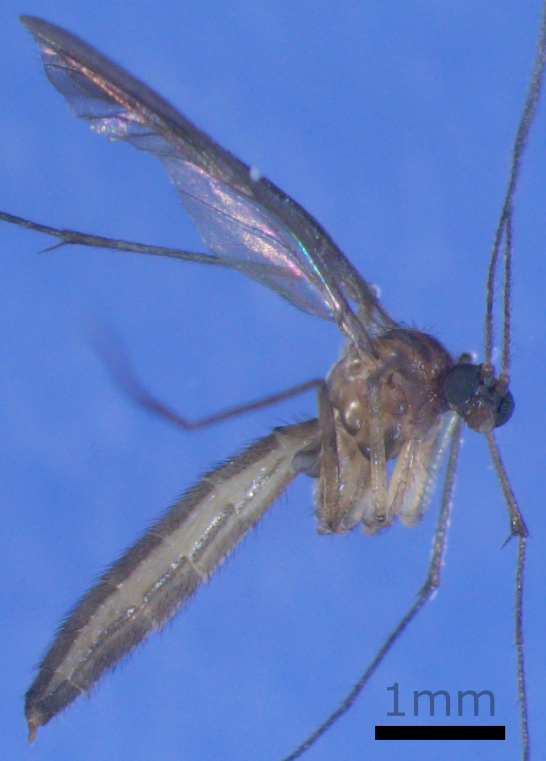


## Muscidae sp.


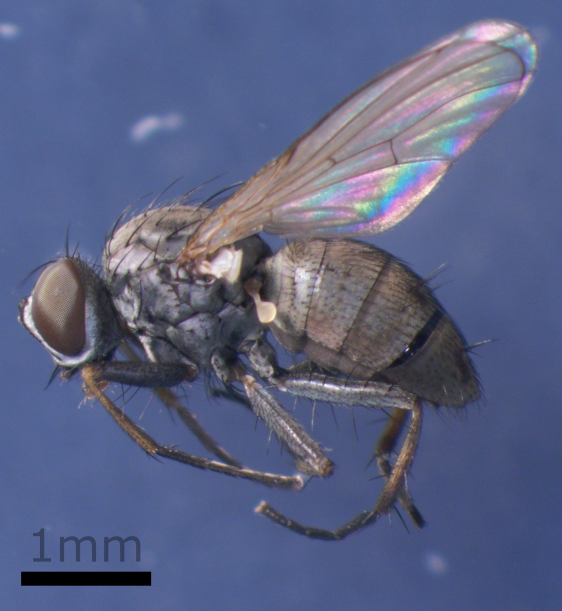


## Mycetophila sp.


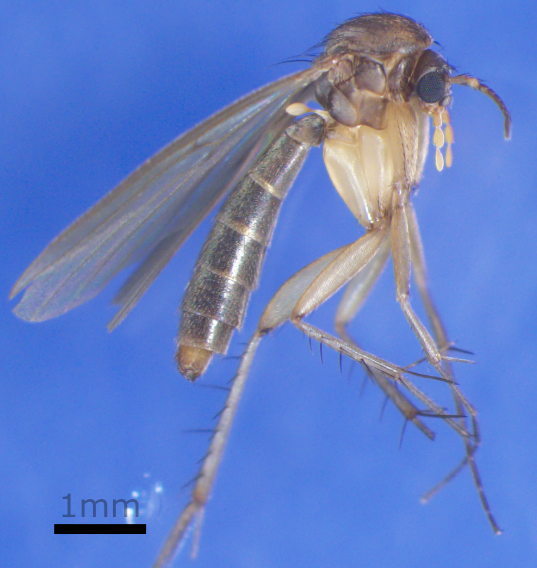


## Pegomya notabilis


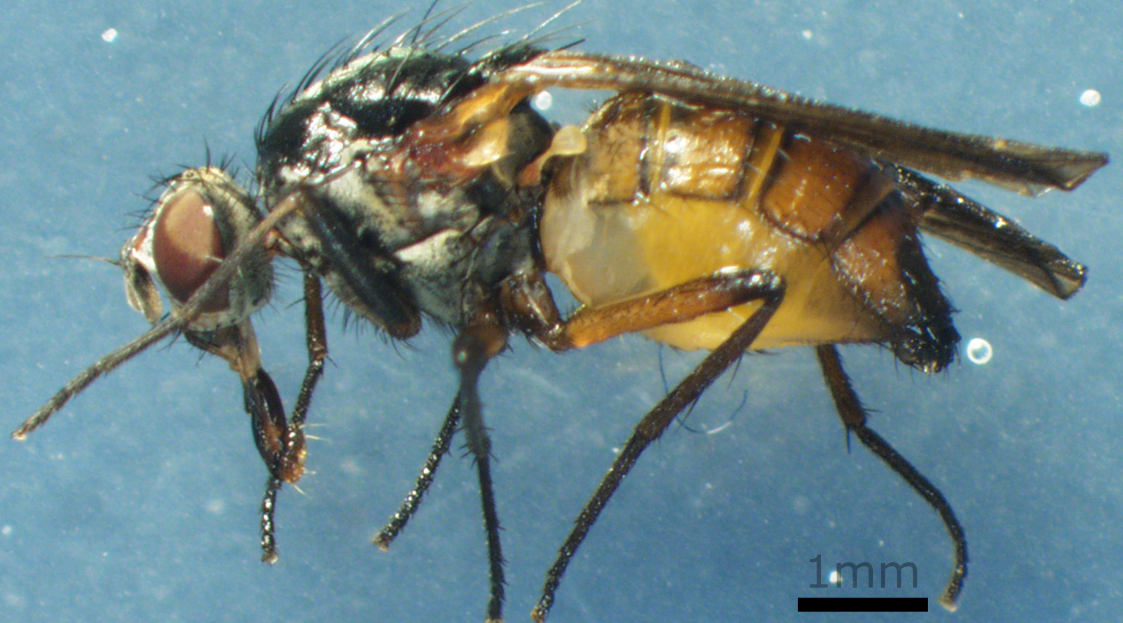


## Pegomya sp.


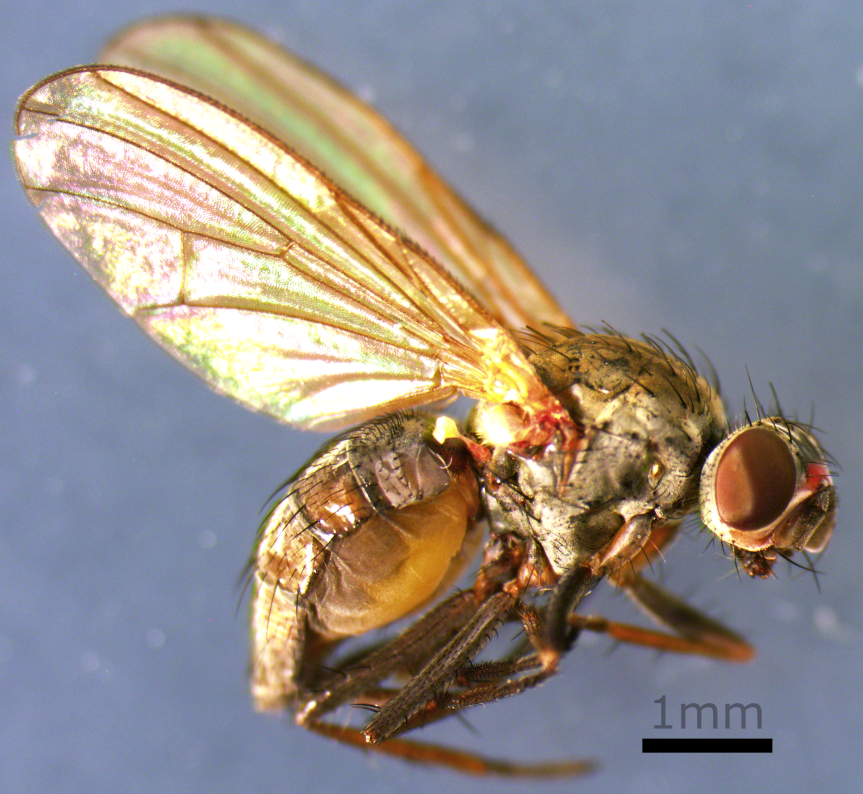


## Pegomya zonata


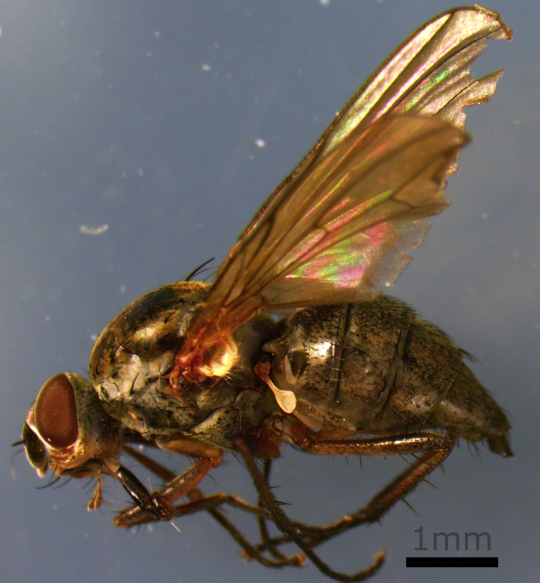


## Piophila sp.


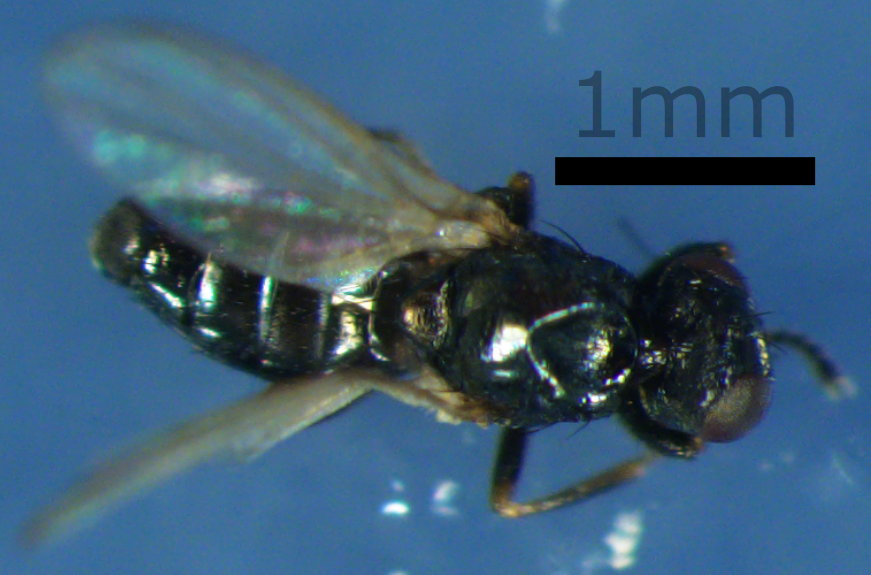


## Protophormia terranovae


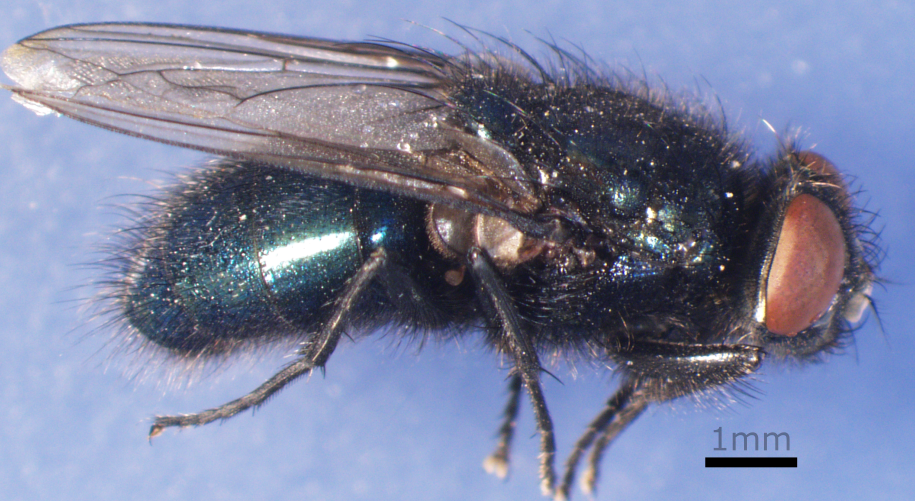


## Scathophaga litorea


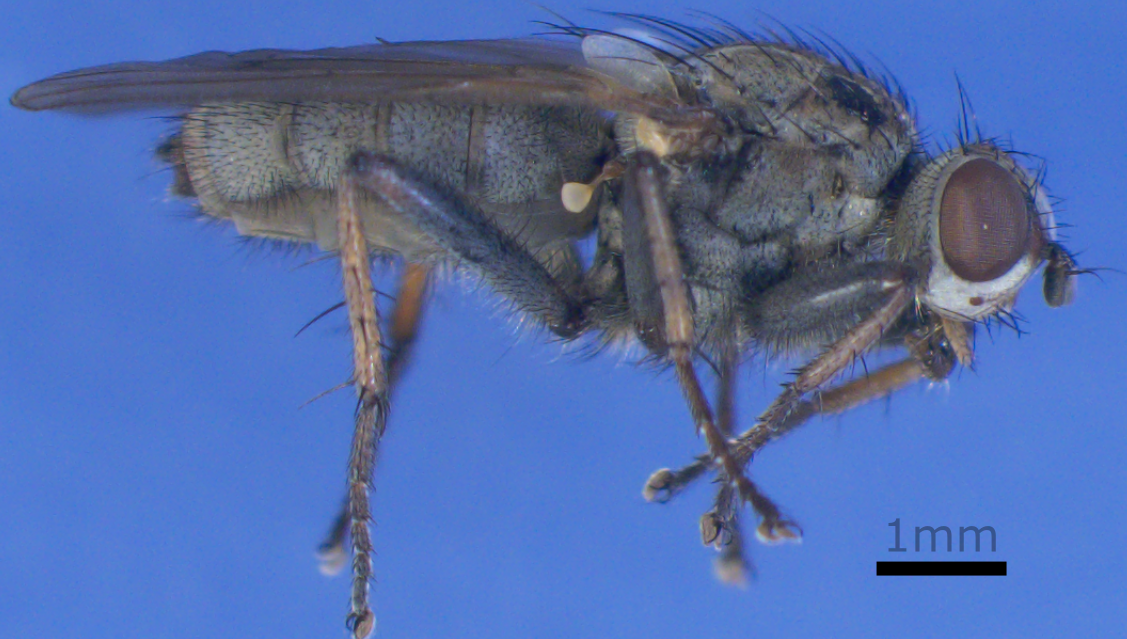


## Scathophaga sp.


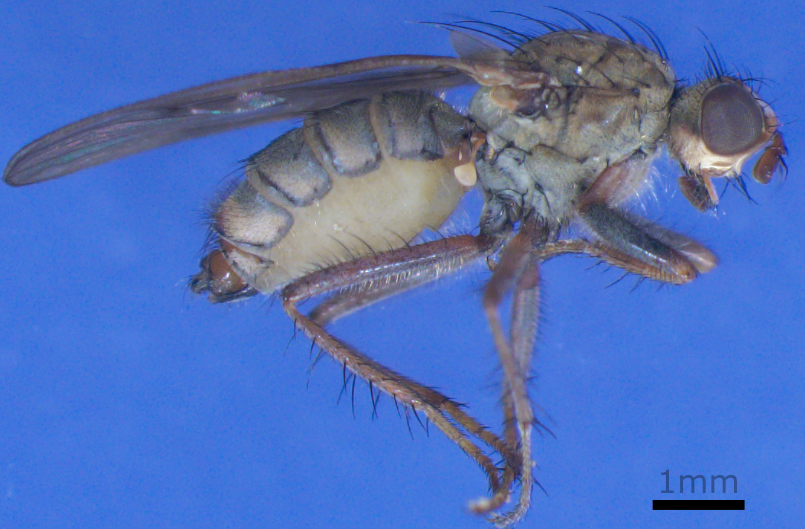


## Scathophagidae sp.


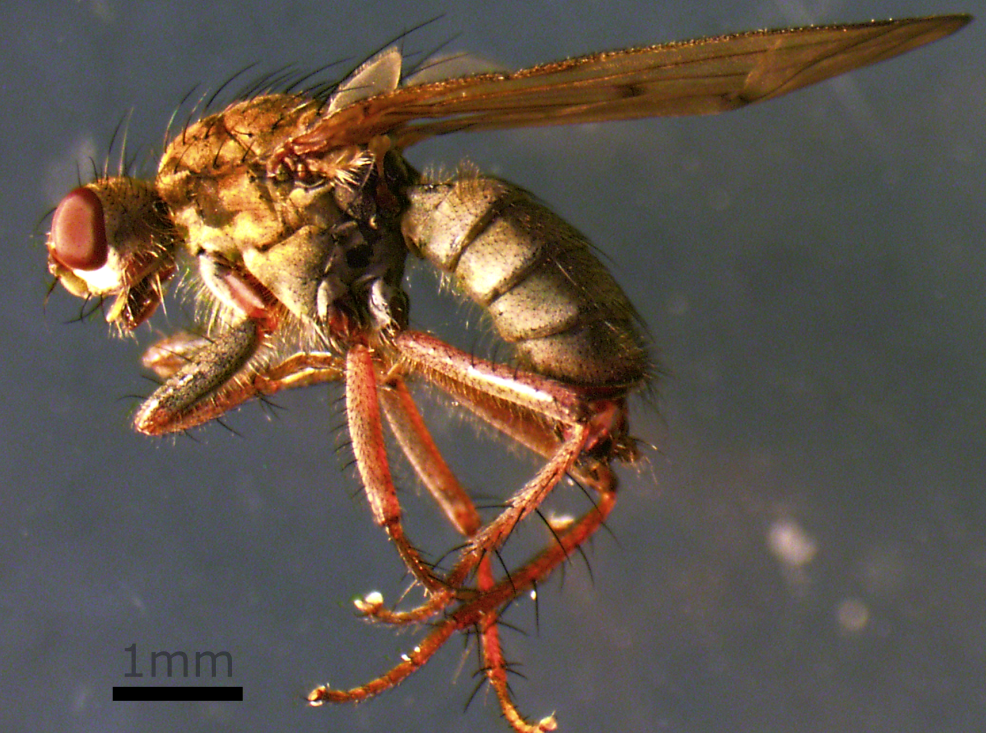


## Sciaridae sp.


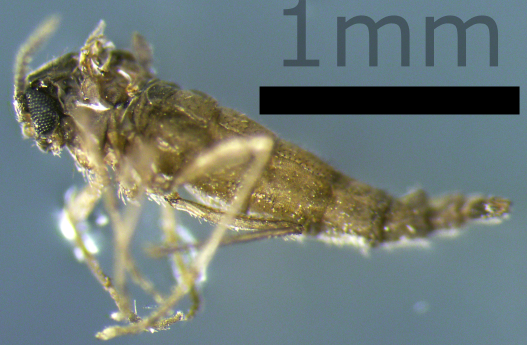


## Simulium sp.


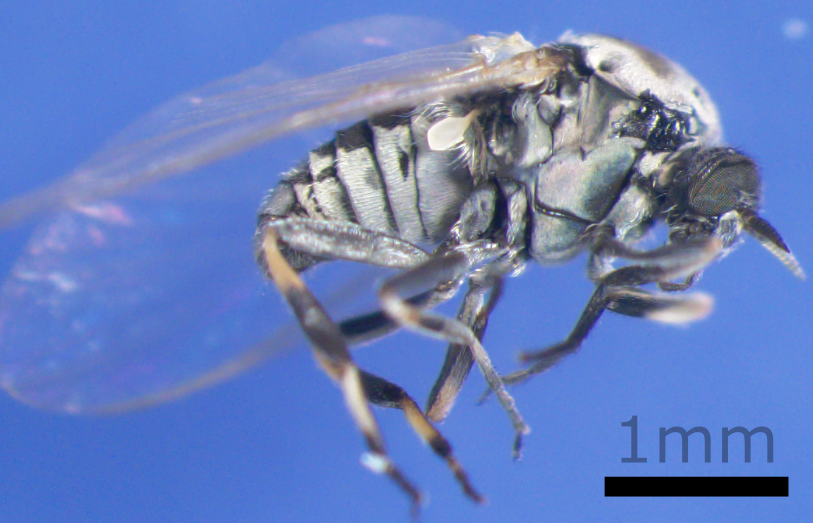


## Simulium vittatum


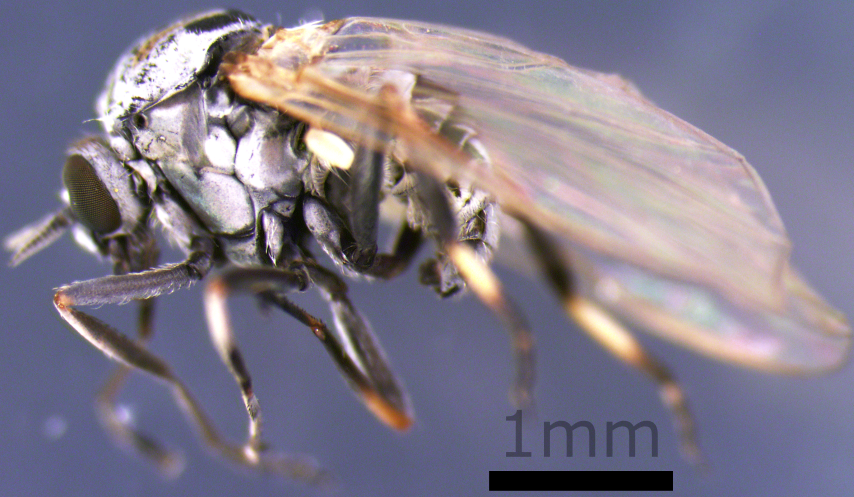


## Sphaerophoria sp.


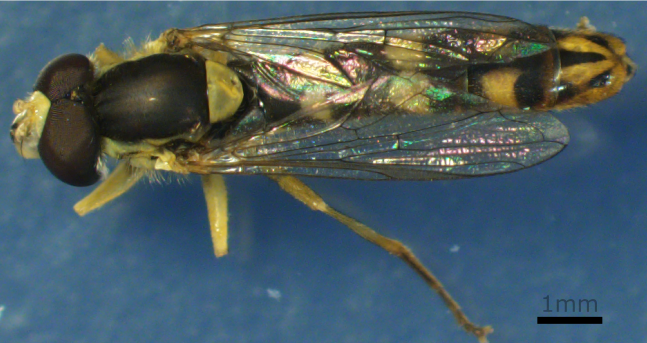


## Spilogona arctica
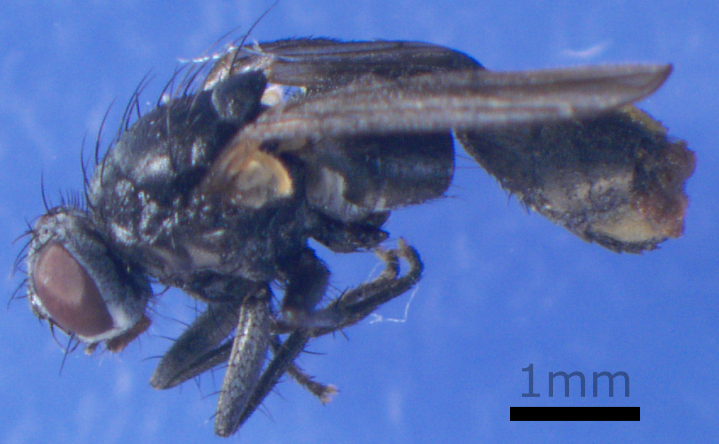


## Spilogona sp.
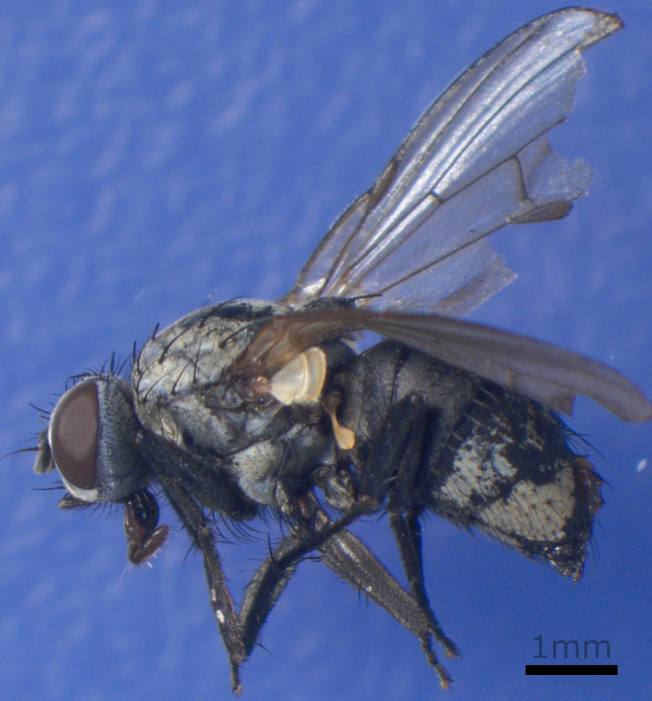


## Syrphidae sp.


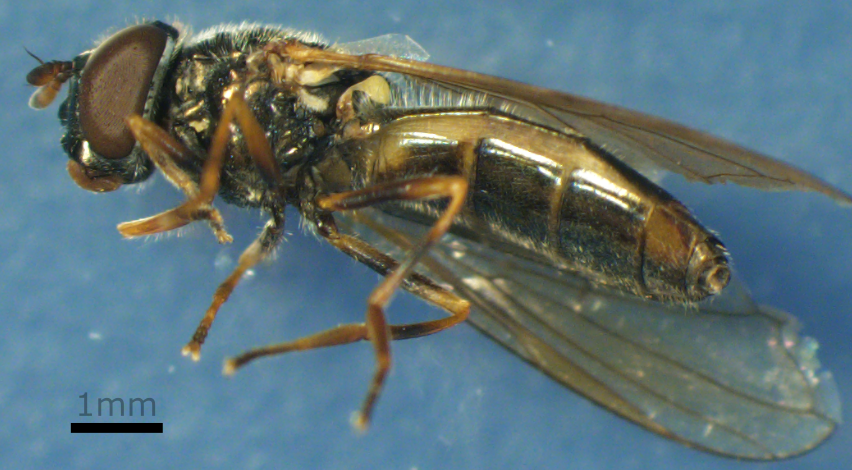


## Tachina ampliforceps


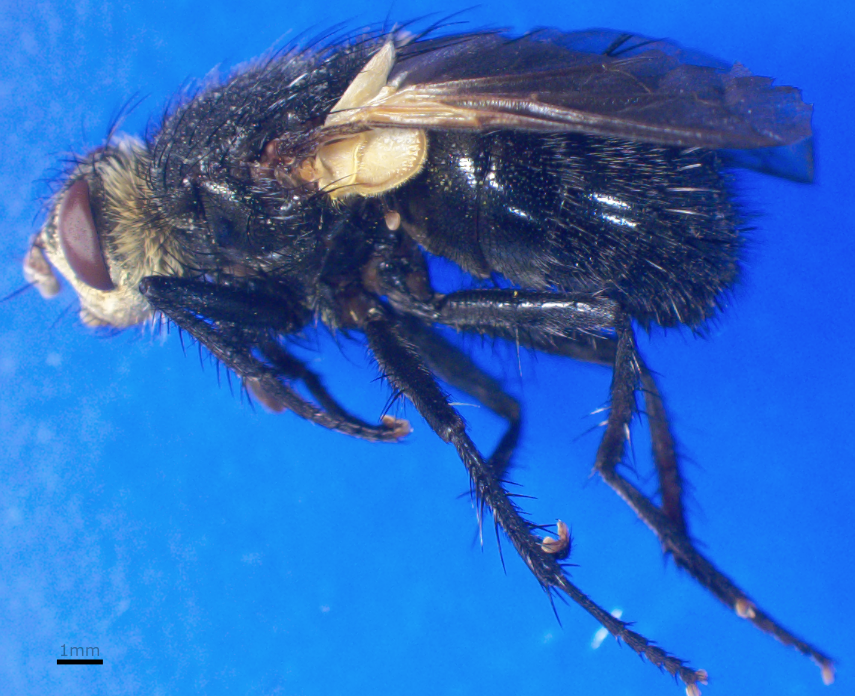


# Entomobryomorpha

## Lepidocyrtus sp.


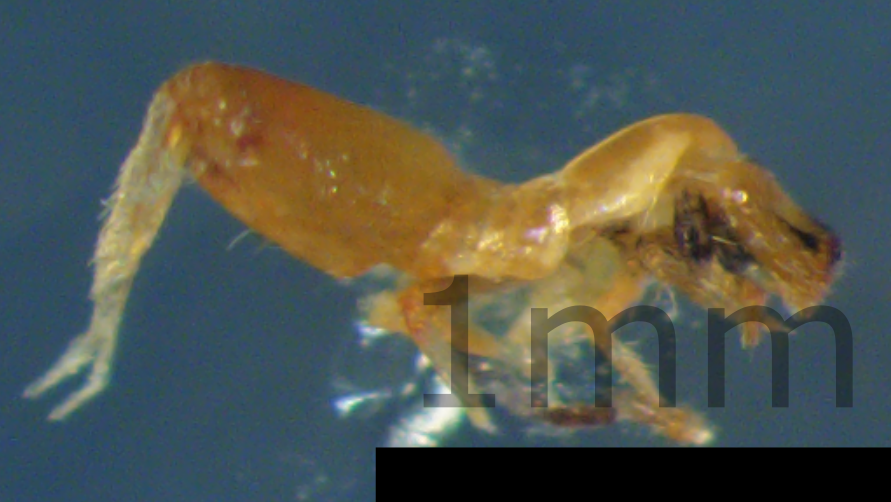


# Hemiptera

## Aphididae sp.


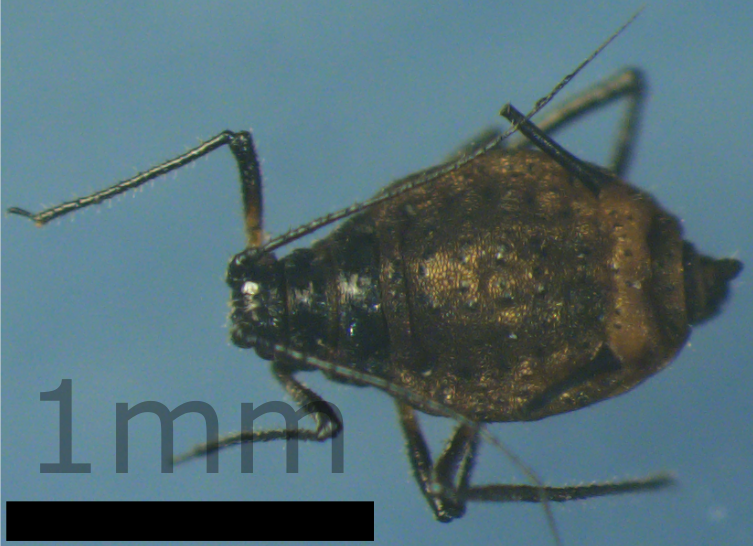


## Cavariella sp.


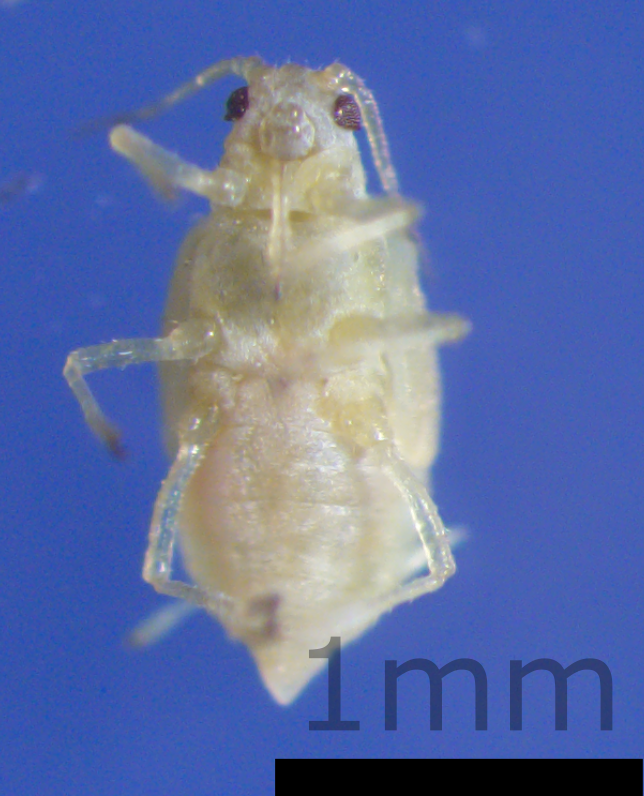


## Euceraphis punctipennis


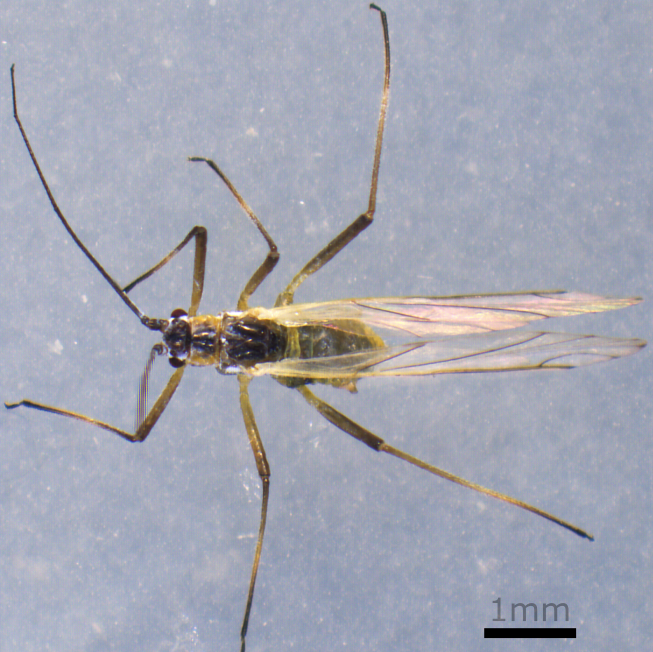


## Euceraphis sp


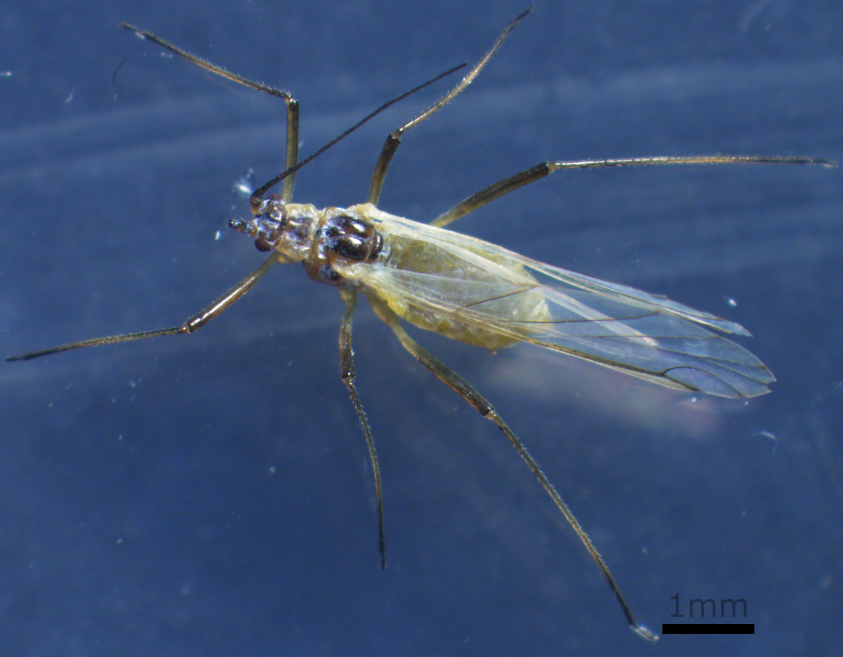


## Myzodium modestum


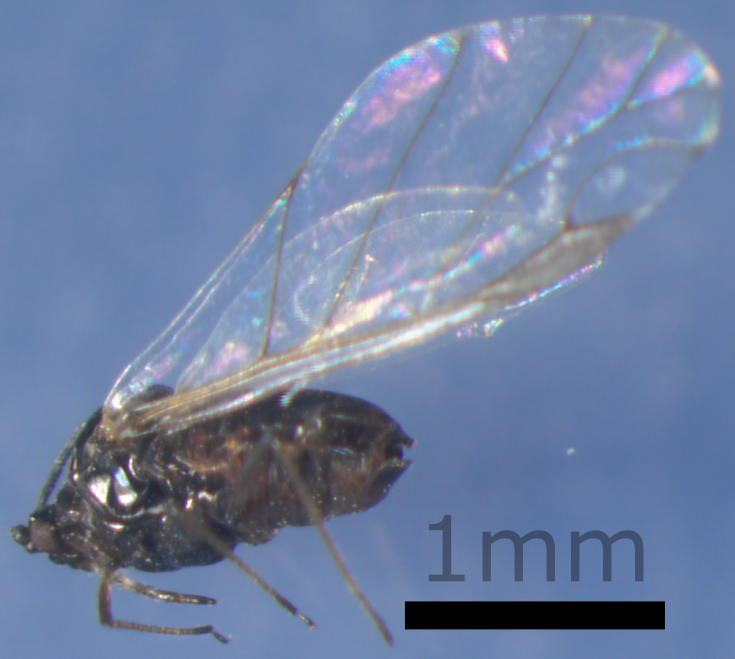


## Nabis flavomarginatus


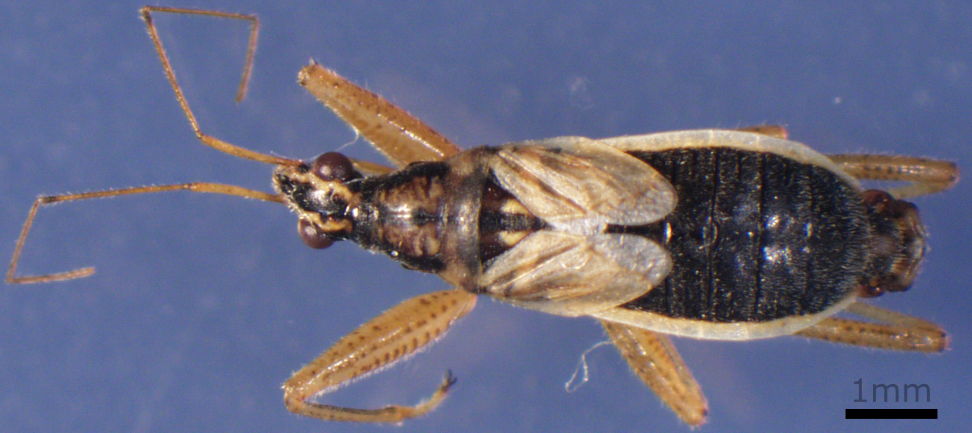


## Nysius groenlandicus


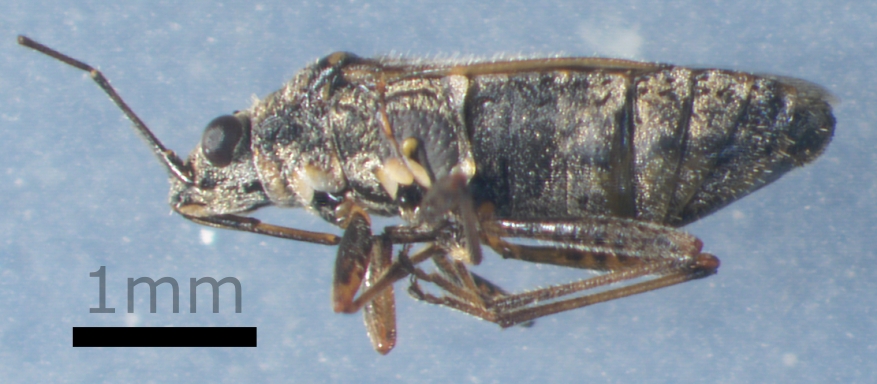


## Psammotettix lividellus


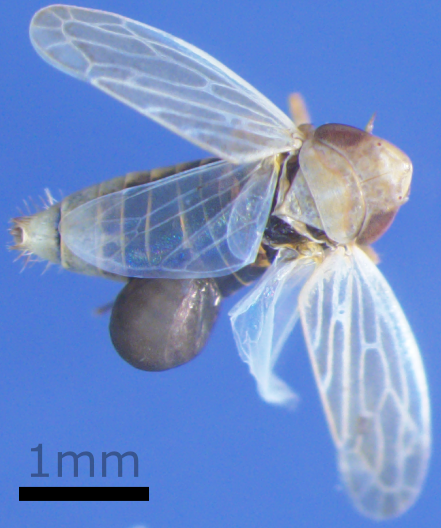


## Psyllidae sp.


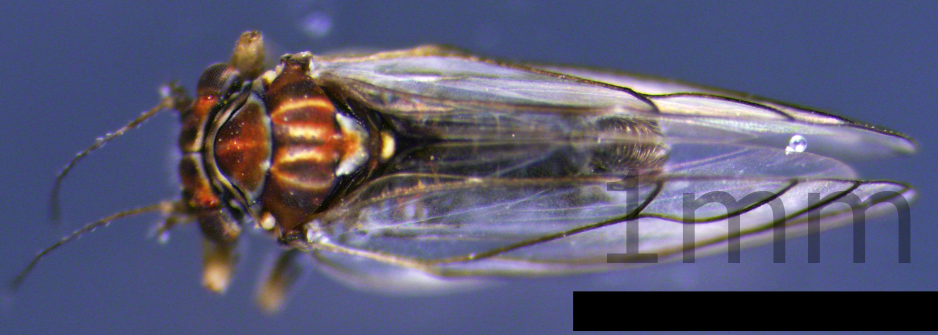


## Pterocomma sp.


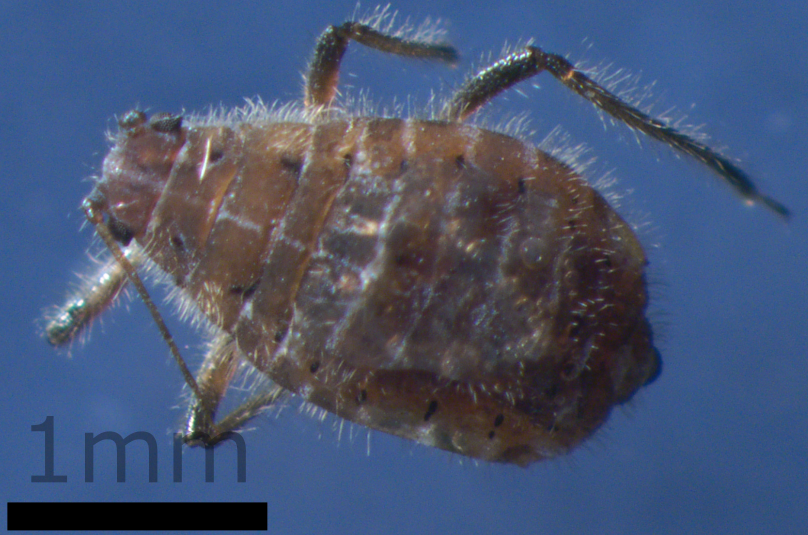


## Utamphorophora sp.


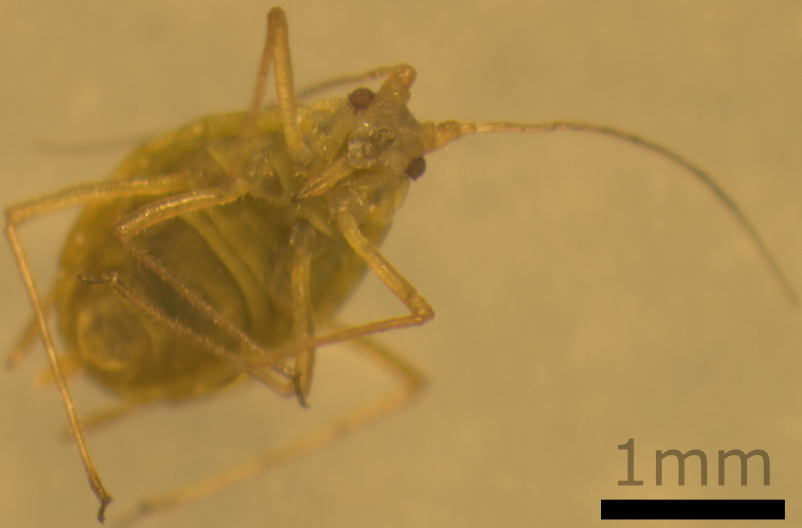


# Hymenoptera

## Brachonidae sp.


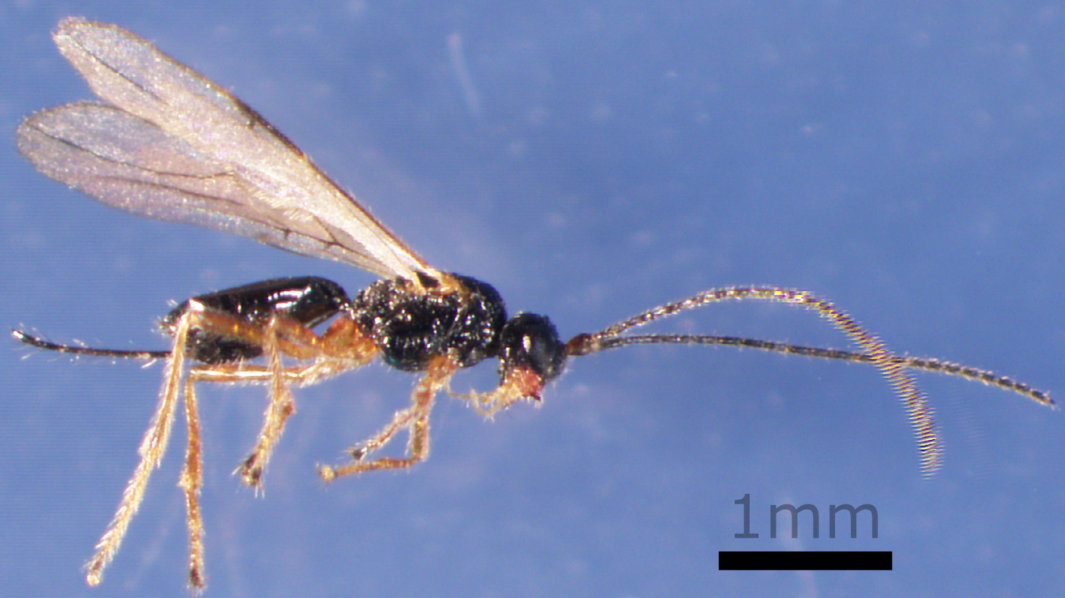


## Campoletis horstmanni


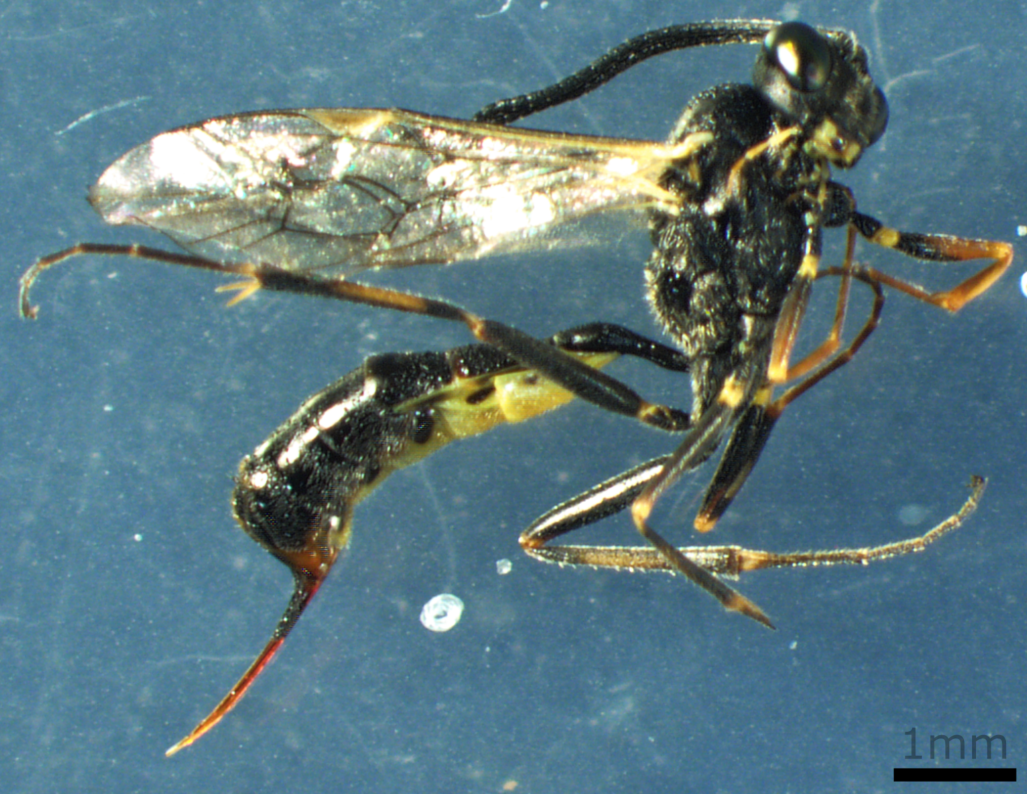


## Campopleginae sp.


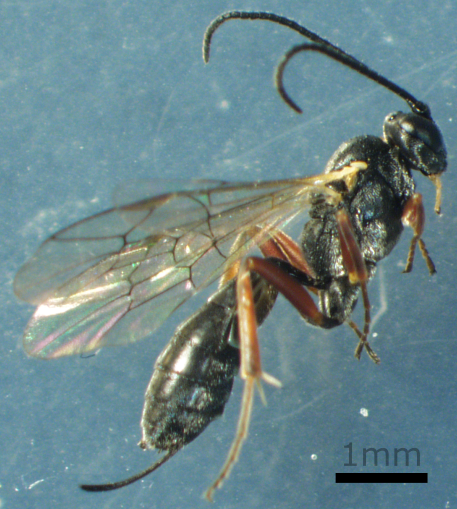


## Hymenoptera sp.


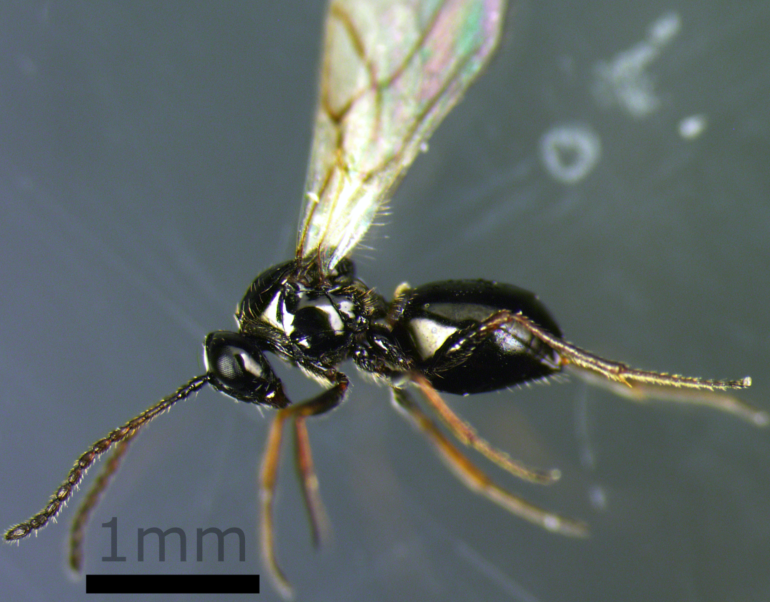


## Hyposoter frigidus


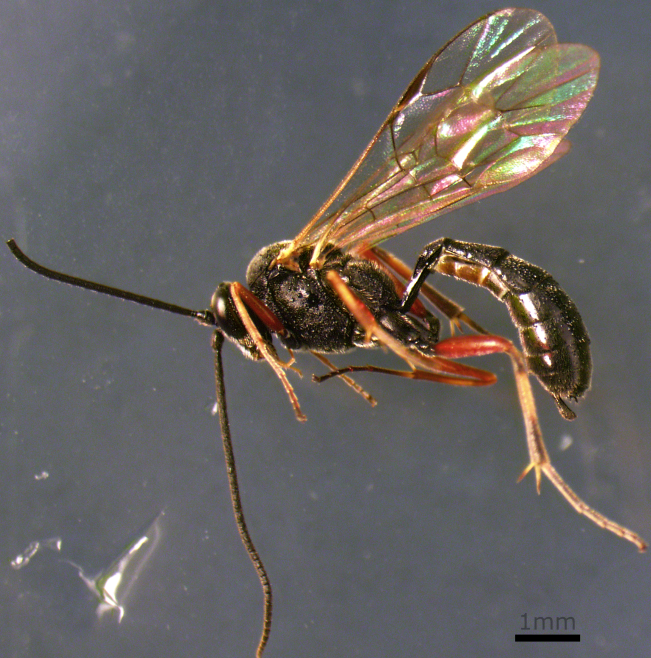


## Hyposoter sp.


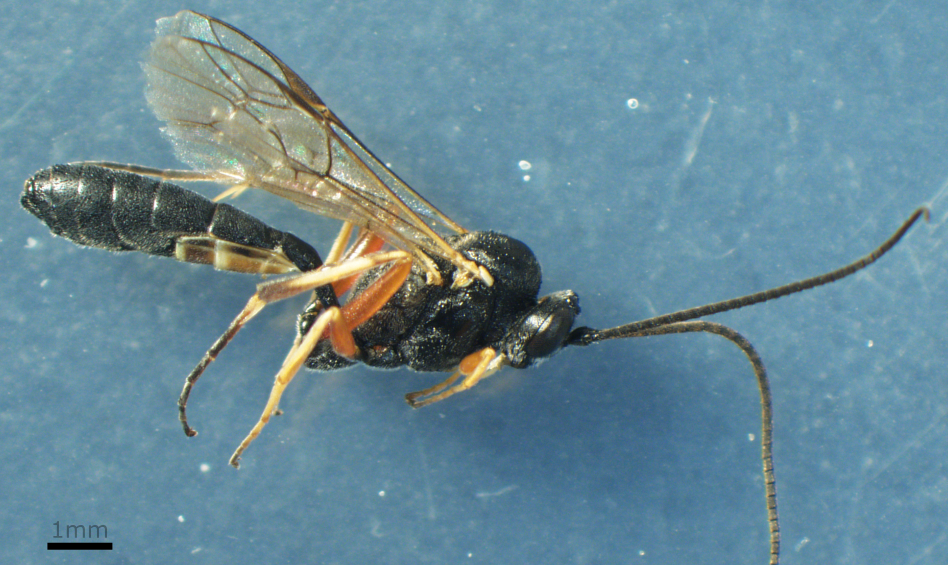


## Ichneumon sarcitorius


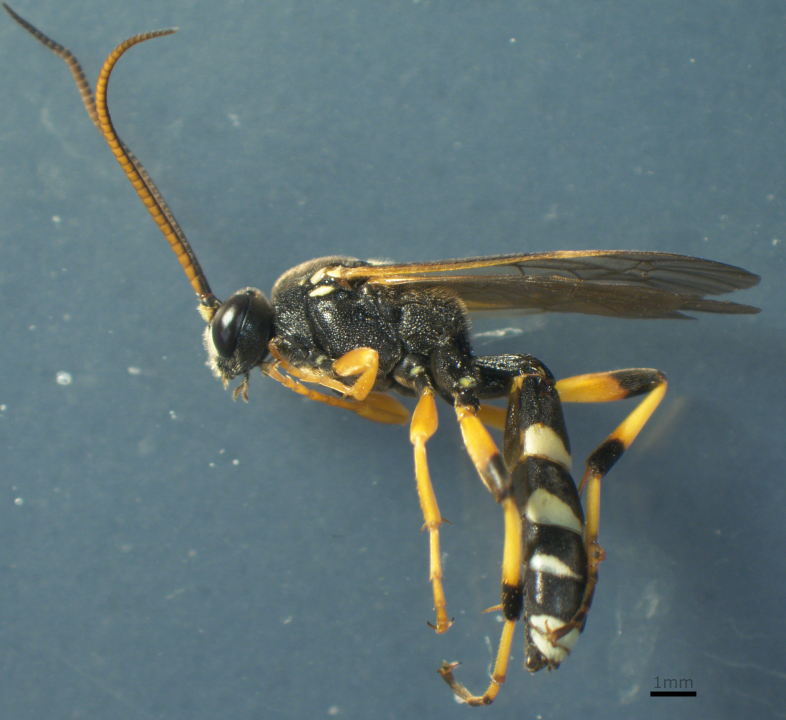


## Ichneumonidae sp.


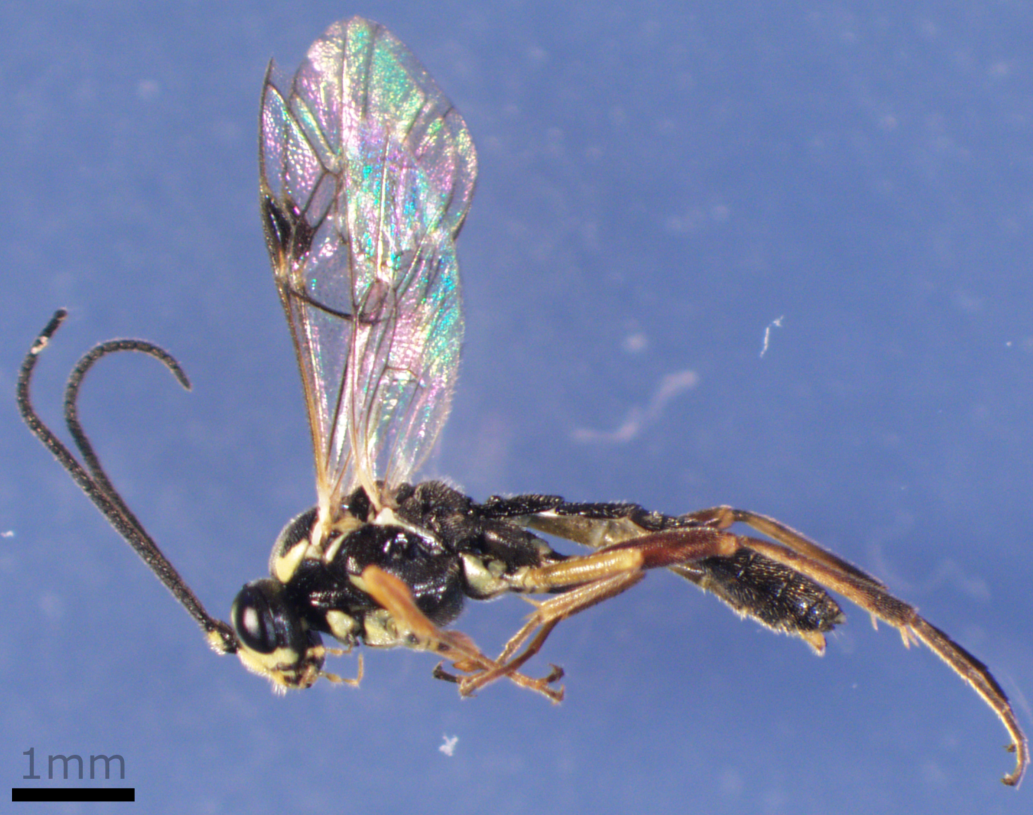


## Meteorus rubens


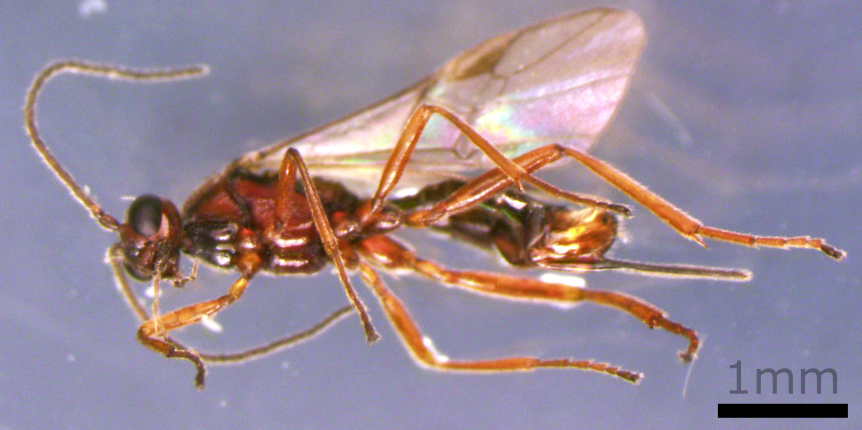


## Panthisarthrus lubricus


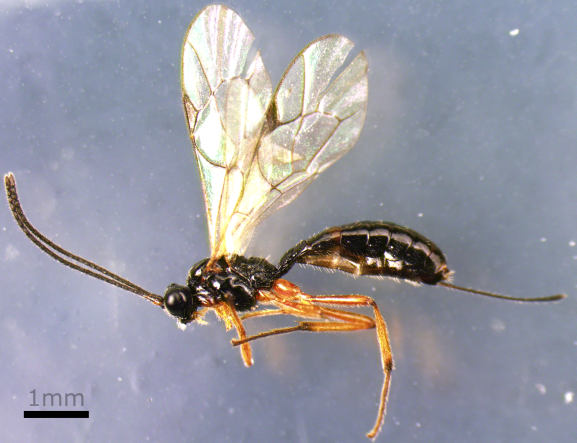


## Protopanatales fulvipes


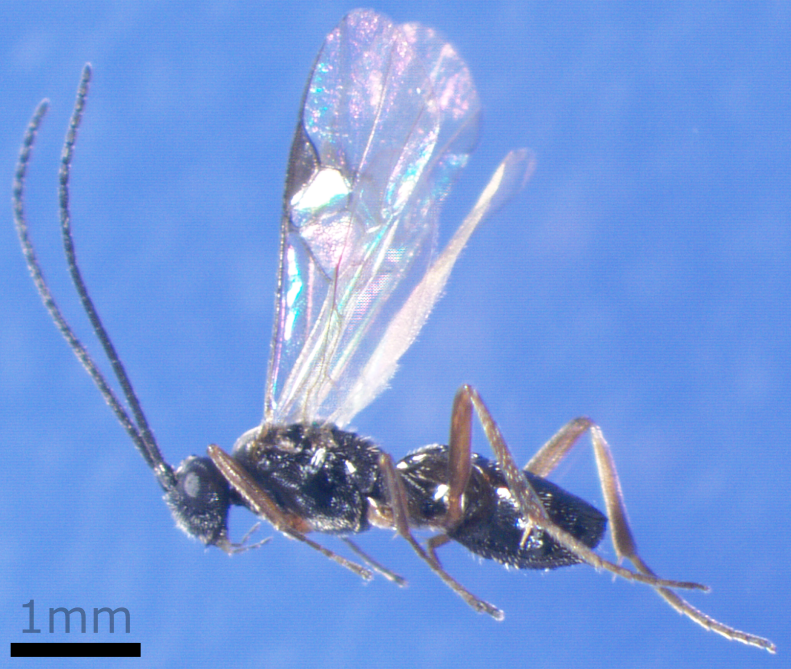


## Tenthredinidae sp.


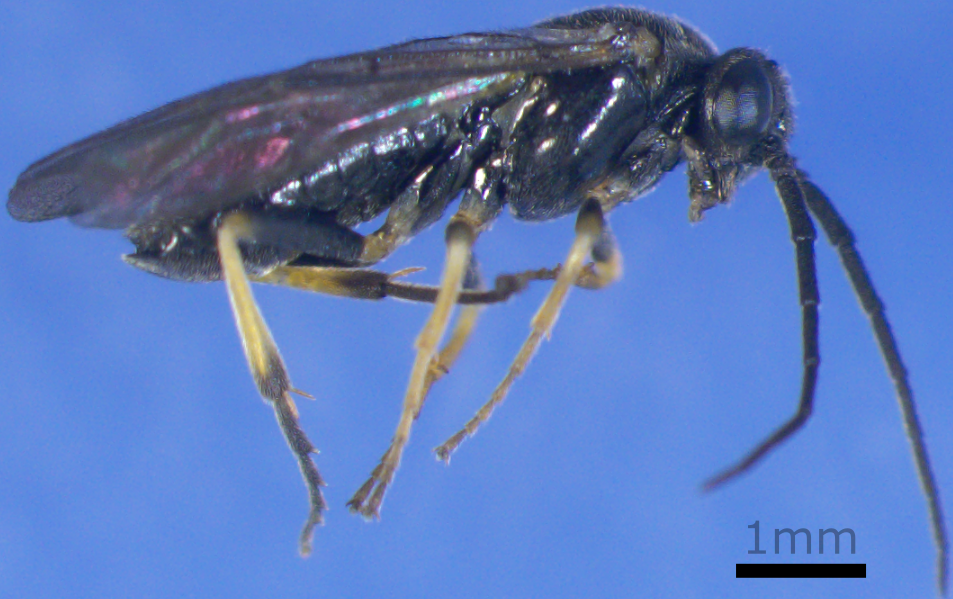


# Lepidoptera

## Acleris caryosphena


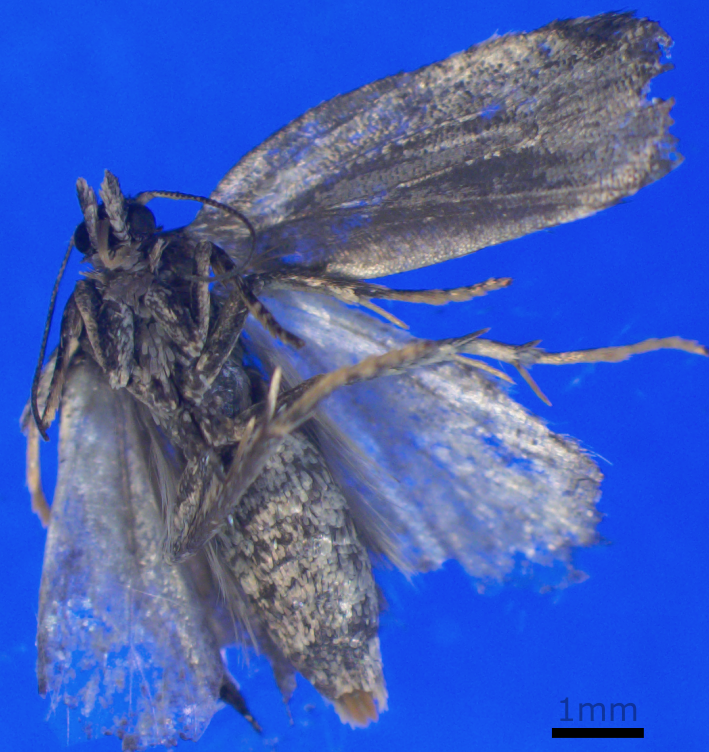


## Autographa gamma


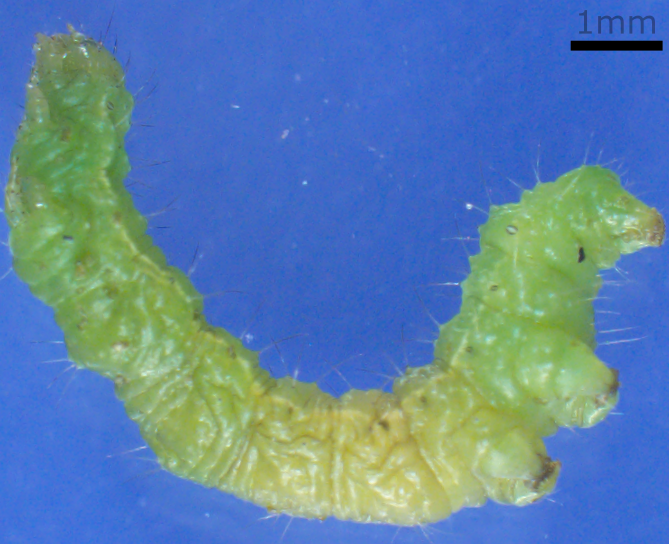


## Eurois occulta


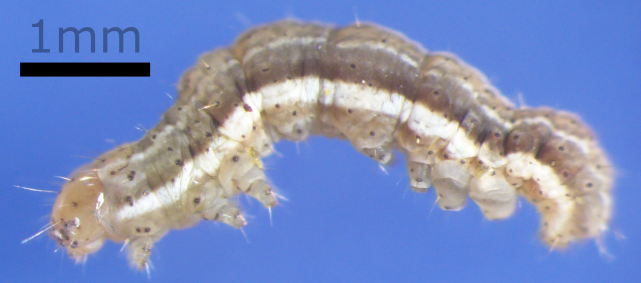


## Mniotype adusta


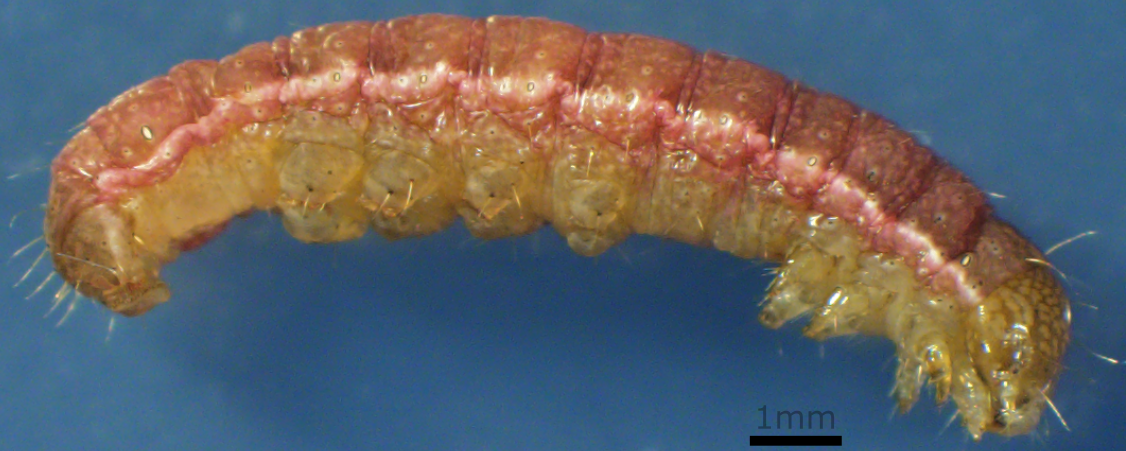


## Scythris noricella


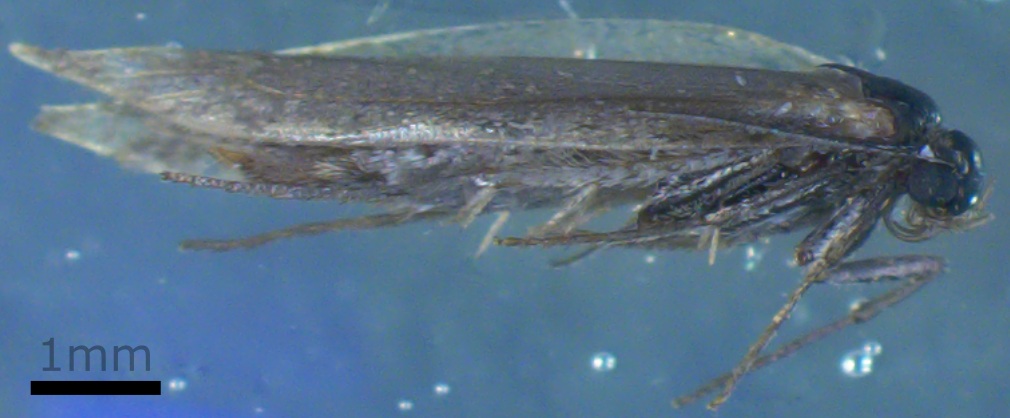


## Spaelotis clandestine


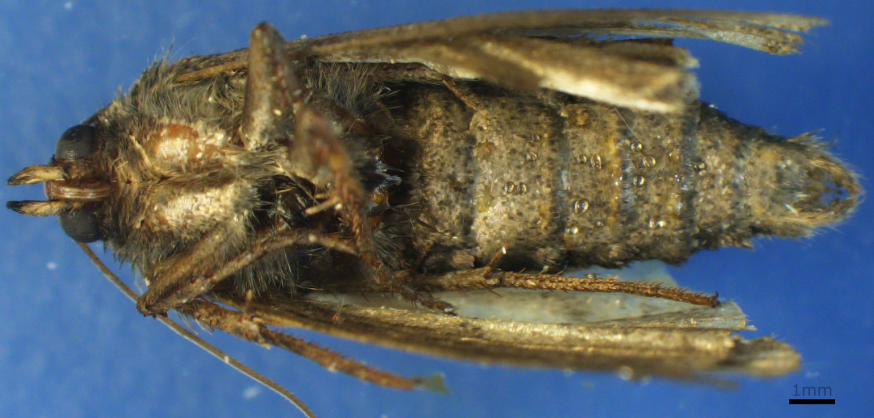


## Syngrapha borea


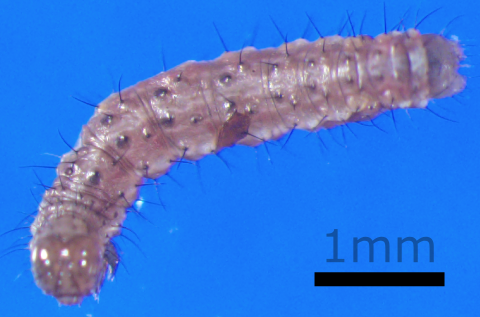


## Torticidae sp.


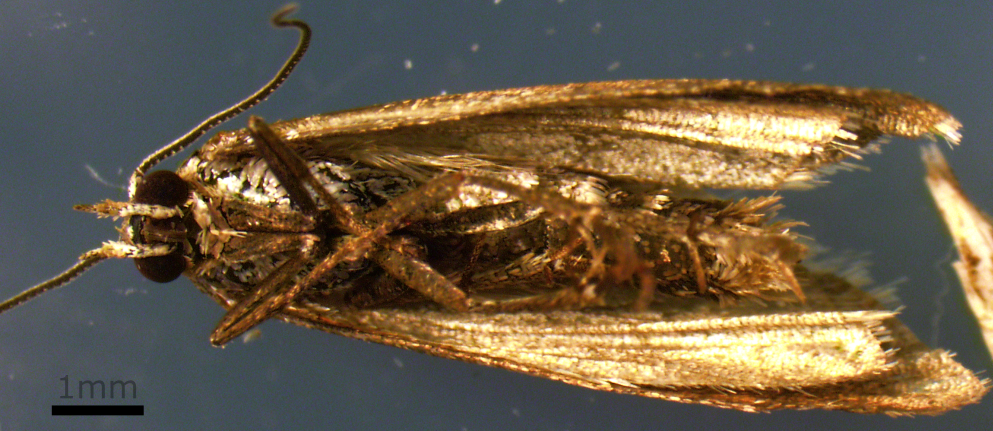


# Neuroptera

## Hemerobius ovalis


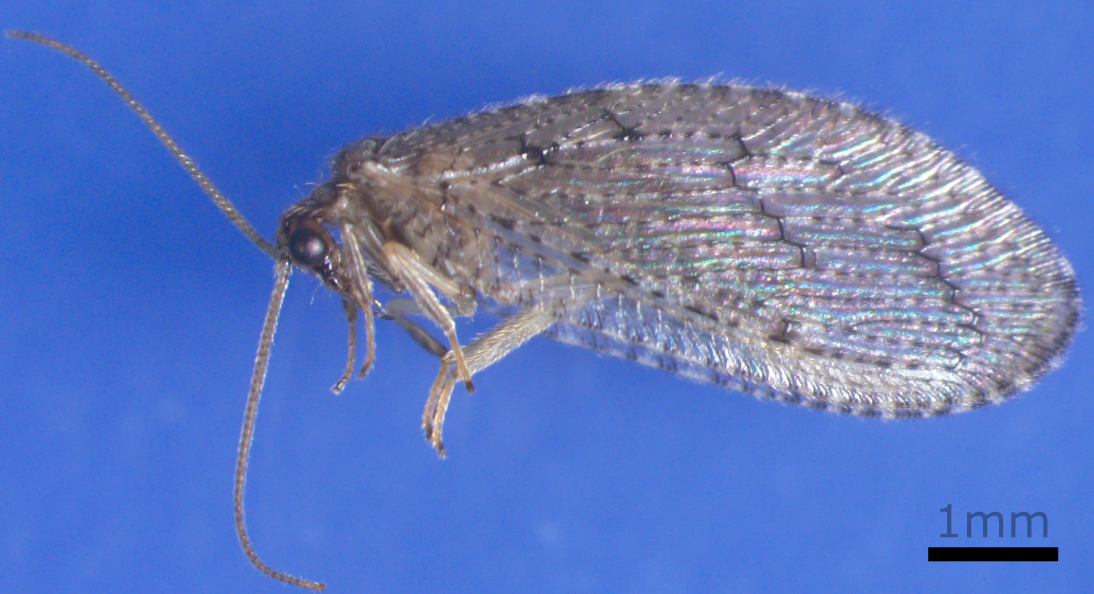


## Wesmaelius nervosus


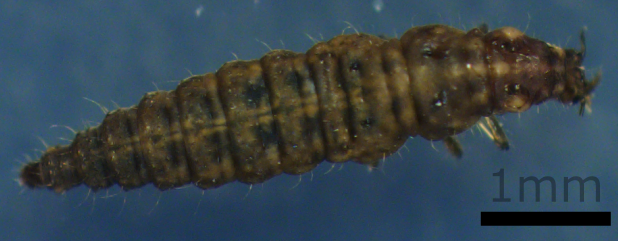


# Trichoptera

## Limnephilus kennicotti


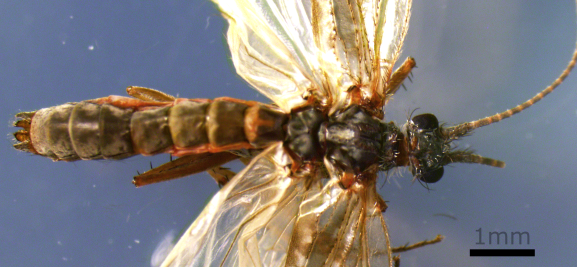


## Limnephilus sp.


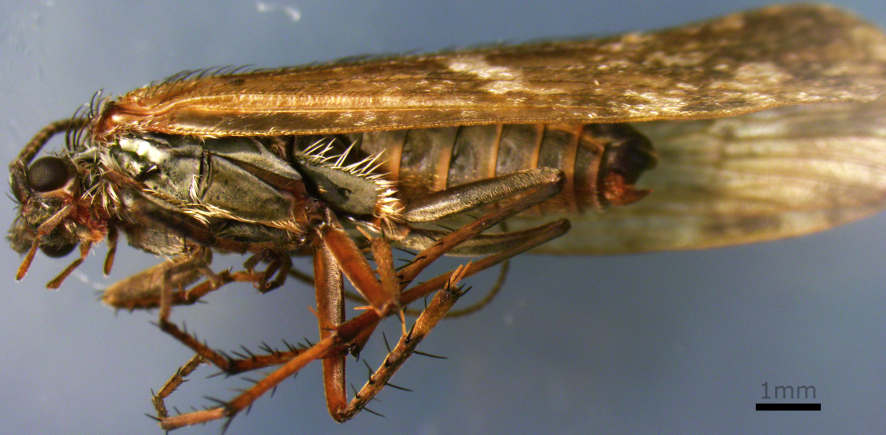


# Trombidiformes

## Anystidae sp.


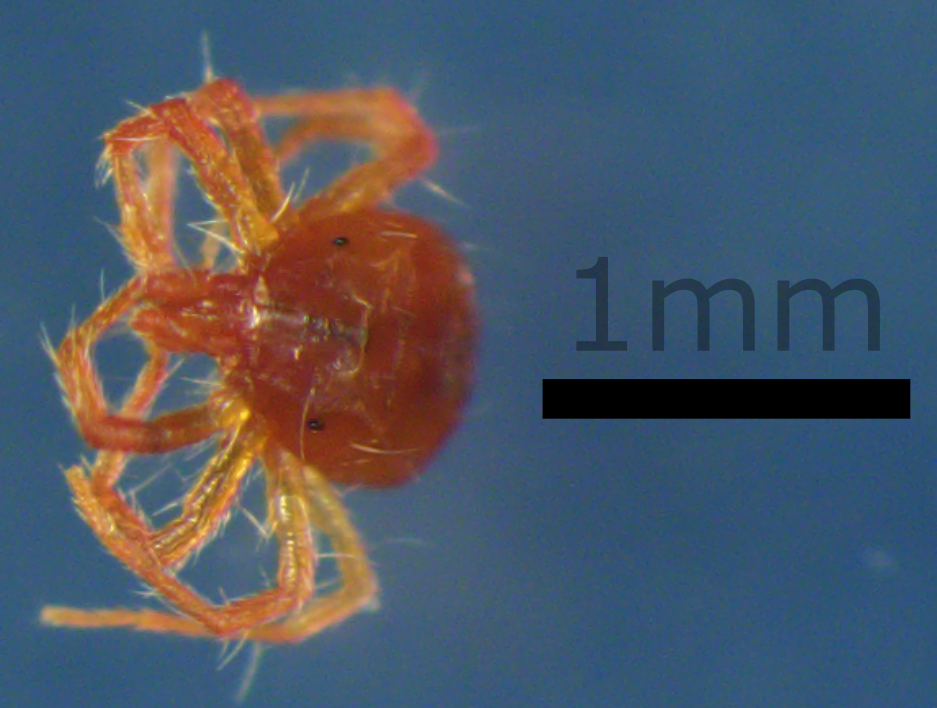

Supplement: Supplementary file 1 [file 8a154b6418821be7852c7e09.docx]
