# Supplementary material for: Heat tolerance and thermal scope are evolutionarily constrained in Greenlandic terrestrial arthropods
Source: Research Square preprint supplement (doi:10.21203/rs.3.rs-5640068/v1), 2024-12-23
Supplement: Supplementary file 3 [file f83340b02e2f608dce25da02.xlsx]

## Sheet: Overblik
Sample ID	Primer Pair	Treatment	Crit_term_lim ˚C	Length (mm)	Kingdom	Phylum	Class	Order	Family	Genus	Species	Sequence	% identity
Run 6, Sample 123	LCO1490 + HCO2198	CTmax	45.85	4.5	Animalia	Arthropoda	Arachnida	Araneae			Araneae sp.	TAGGGCATCTCCCTCCACCAGGCAGGATCAAAAAAAGAAGTATTAAAATTTCGATCTGTTAATAATATAGTAATAGCACCTGCTAATACAGGTAAAGAAAGCAACAATAGTACTGCCGTAATTAAAACTGATCAAACAAAAAGAGGAACTTTTTCTATAGATATTCCTAATATTCGTATATTAATAATAGTAGAAATAAAATTTACAGCCCCTATAATAGAAGAAGCACCAGCTAAATGAAGAGAAAAAATAGCAAAATCCATTGAACTTCCTATATGACCAACCGTAGATGCTAAAGGAGGATAAACAGTTCATCCAGCACCAACTCCTATTTCTACTATAGAGGATATTGACAATAAAAATAATGAAGGAGGTAATAATCAAAAAGAAAGATTATTT…
Run 5, Sample 59	LCO1490 + HCO2198	CTmax	34.96	5.2	Animalia	Arthropoda	Arachnida	Araneae			Araneae sp.	TAAAAGGTTGAAATAAATAGGGATCTCCTCCACCAGCAGGATCAAAAAAAGAAGTATTAAAATTTCGATCTGTTAATAATATAGTAATAGCACCTGCTAATACAGGTAAAGAAAGCAACAATAGTACTGCCGTAATTAAAACTGATCAAACAAAAAGAGGAACTTTTTCTATAGATATTCCTAATATTCGTATATTAATAATAGTAGAAATAAAATTTACAGCCCCTATAATAGAAGAAGCACCAGCTAAATGAAGAGAAAAAATAGCAAAATCCATTGAACTTCCTATATGACCAACCGTAGATGCTAAAGGAGGATAAACAGTTCATCCAGCACCAACTCCTATTTCTACTATAGAGGATATTGACAATAAAAATAATGAAGGAGGTAATAATCAAA…
Run 3, Sample 86	BR2 + BF3	CTmin	-6.2	3.3	Animalia	Arthropoda	Arachnida	Araneae	Araneidae	Araneus	Araneus groenlandicola	AGTTAATAATATAGTAATAGCACCAGCTAATACGGGTAGGGAAAGCAATAACAATACAGCAGTAATTAATACAGATCATACAAATAACGGAACTTTTTCTATAGTTATTCCATAAAATCGTATATTAATAATTGTTGAAATAAAATTAATAGCACCTATAATAGATGATGCCCCAGCTAAATGTAAAGAAAAAATTGCAAAATCTACAGAACTTCCAGCATGTCCCTCAAGACCTGCTAGTGGAGGATACACAGTTCAACCTGCCCCTACGCCCATTTCAACTATAGAAGACACAATTAGAAGAAACAAAGAAGGAGGAAGTAACCAAAATCTTAAATTATTTATTCGGGGAAAGGCCATGT
Run 6, Sample 60	BR2 + BF3	CTmax		1.6	Animalia	Arthropoda	Arachnida	Araneae	Araneidae	Araneus	Araneus groenlandicola	AAAAAAAATGGTTTGGAAATTAAAATTAAGGGATCCCCACCCTCCAGAAGGATCAAAAAATGAAGTATTAAAATTTCGATCAGTTAATAATATAGTAATAGCACCAGCTAATACAGGTAGGGAAAGCAATAACAATACAGCAGTAATTAATACAGATCATACAAATAACGGAACTTTTTCTATAGTTATTCCATAAAATCGTATATTAATAATTGTTGAAATAAAATTAATAGCACCTATAATAGATGATGCCCCAGCTAAATGTAAAGAAAAAATTGCAAAATCTACAGAACTTCCAGCATGTCCCTCAAGACCTGCTAGTGGAGGATACACAGTTCAACCTGCCCCTACGCCCATTTCAACTATAGAAGACACAATTAGAAGAAACAAAGAAGGAGG…	97.1 %
Run 1, Sample 16	LCO1490 + HCO2198	CTmax	43.23	1.5	Animalia	Arthropoda	Arachnida	Araneae	Dictynidae	Dictyna	Dictyna major	AAAGGTGGAATAAATAGGGATCTCCTCCTCCTGCAGGATCAAAAAACGATGTATTAAAATTTCGATCAGTCAACAATATAGTAATAGCTCCTGCTAAAACAGGAAGAGACAATAATAAAAGAACAGCAGTAATTAAAACAGATCACACAAACAATGGAACCTTTTCTATTGTTATTCCCTCTATTCGTATATTAATAATAGTAGAAATAAAATTAATAGCTCCTATAATAGAAGAAGCACCAGCCAAATGTAAAGAAAAAATTGCAAAATCTACAGATCTGCCCGAATGTCCAACTAAGGAAGCCAAAGGAGGGTAAATAGTCCATCCCGCTCCAACACCTATCTCAACTATAGAAGAAATAAACAATAATAATAAAGAAGGAGGTAATAATCAAAATC…
Run 1, Sample 25	LCO1490 + HCO2198	CTmax	49.71	2.1	Animalia	Arthropoda	Arachnida	Araneae	Dictynidae	Dictyna	Dictyna major	AAAAAGGTGGAATAAATAGGGATCTCCCCCTCCCGCAGGATCAAAAAACGATGTATTAAAATTTCGATCAGTCAACAATATAGTAATAGCTCCTGCTAAAACAGGAAGAGACAATAATAAAAGAACAGCAGTAATTAAAACAGATCACACAAACAATGGAACTTTTTCTATTGTTATTCCTTCTATTCGTATATTAATAATAGTAGAAATAAAATTAATAGCTCCTATAATAGAAGAAGCACCAGCCAAATGTAAAGAAAAAATTGCAAAATCTACAGATCTACCCGAATGTCCAACTAGAGAAGCCAAAGGAGGGTAAATCGTCCATCCAGCCCCAACACCTATCTCAACCATAGAAGAAATAAACAATAATAATAAAGAAGGGGGTAGTAATCAAAA…
Run 1, Sample 57	LCO1490 + HCO2198	CTmax	48.6	0.7	Animalia	Arthropoda	Arachnida	Araneae	Dictynidae	Dictyna	Dictyna major	GTGGAAAAAATAGGGATCTCCCCCTCCCGCAGGATCAAAAAACGATGTATTAAAATTTCGATCAGTCAACAATATAGTAATAGCTCCTGCTAAAACAGGAAGAGACAATAATAAAAGAACAGCAGTAATTAAAACAGATCACACAAACAATGGAACTTTTTCTATTGTTATTCCTTCTATTCGTATATTAATAATAGTAGAAATAAAATTAATAGCTCCTATAATAGAAGAAGCACCAGCCAAATGTAAAGAAAAAATTGCAAAATCTACAGATCTACCCGAATGTCCAACTAGAGAAGCCAAAGGAGGGTAAATCGTCCATCCAGCCCCAACACCTATCTCAACCATAGAAGAAATAAACAATAATAATAAAGAAGGGGGTAATAATCAAAATCTTAA…
Run 2, Sample 121	LCO1490 + HCO2198	CTmin	-4.71	1.8	Animalia	Arthropoda	Arachnida	Araneae	Dictynidae	Dictyna	Dictyna major	AAAAAATGTTGAAATAAATAGGGATCTCCCCCTCCCGCAGGATCAAAAAACGATGTATTAAAATTTCGATCAGTCAACAATATAGTAATAGCTCCTGCTAAAACAGGAAGAGACAATAATAAAAGAACAGCAGTAATTAAAACAGATCACACAAACAATGGAACTTTTTCTATTGTTATTCCTTCTATTCGTATATTAATAATAGTAGAAATAAAATTAATAGCTCCTATAATAGAAGAAGCACCAGCCAAATGTAAAGAAAAAATTGCAAAATCTACAGATCTACCCGAATGTCCAACTAAAGAAGCCAAAGGAGGGTAAATCGTCCATCCAGCCCCAACACCTATCTCAACCATAGAAGAAATAAACAATAATAATAAAGAAGGGGGTAATAATCAA…
Run 2, Sample 66	LCO1490 + HCO2198	CTmin	-4.64	1.9	Animalia	Arthropoda	Arachnida	Araneae	Dictynidae	Dictyna	Dictyna major	GGTTGAAATAAATAGGGATCTCCCCCTCCCGCAGGGTCAAAAAACGATGTATTAAAATTTCGATCAGTCAACAATATAGTAATAGCTCCCGCTAAAACAGGAAGAGACAATAATAAAAGAACAGCAGTAATTAAAACAGATCACACAAACAATGGAACTTTTTCTATTGTTATTCCTTCTATTCGTATATTAATAATAGTAGAAATAAAATTAATAGCTCCTATAATAGAAGAAGCACCAGCCAAATGTAAAGAAAAAATTGCAAAATCTACAGATCTACCCGAATGTCCAACTAGAGAAGCCAAAGGAGGGTAGATCGTCCATCCAGCCCCAACACCTATCTCAACCATAGAAGAAATAAACAATAATAATAAAGAAGGGGGTAGTAATCAAAATCTT…
Run 3, Sample 88	LCO1490 + HCO2198	CTmin	-5.51	2.5	Animalia	Arthropoda	Arachnida	Araneae	Dictynidae	Dictyna	Dictyna major	CCCTCCCGACACAGGTCAAAAAACGATGTATTAAAATTTCGATCAGTCAACAATATAGTAATAGCTCCCGCTAAAACAGGAAGAGACAATAATAAAAGAACAGCAGTAATTAAAACAGATCACACAAACAATGGAACTTTTTCTATTGTTATTCCTTCTATTCGTATATTAATAATAGTAGAAATAAAATTAATAGCTCCTATAATAGAAGAAGCACCAGCCAAATGTAAAGAAAAAATTGCAAAATCTACAGATCTACCCGAATGTCCAACTAGAGAAGCCAAAGGAGGGTAGATCGTCCATCCAGCCCCAACACCTATCTCAACCATAGAAGAAATAAACAATAATAATAAAGAAGGGGGTAGTAATCAAAATCTTAAATTATTCATTCGAGGAAAA…
Run 4, Sample 116	LCO1490 + HCO2198	CTmin	-6.25	3	Animalia	Arthropoda	Arachnida	Araneae	Dictynidae	Dictyna	Dictyna major	AAAAGGTGAATAAATAGGATCTCCCCCTCCCGCAGGATCAAAAAACGATGTATTAAAATTTCGATCAGTCAACAATATAGTAATAGCTCCTGCTAAAACAGGAAGAGACAATAATAAAAGAACAGCAGTAATTAAAACAGATCACACAAACAATGGAACTTTTTCTATTGTTATTCCTTCTATTCGTATATTAATAATAGTAGAAATAAAATTAATAGCCCCTATAATAGAAGAAGCACCAGCCAAATGTAAAGAAAAAATTGCAAAATCTACAGATCTACCTGAATGTCCAACTAGAGAAGCCAAAGGAGGGTAAATCGTCCATCCAGCCCCAACACCTATCTCAACCATAGAAGAAATAAACAATAATAATAAAGAAGGGGGTAGTAATCAAAATCT…
Run 4, Sample 131	LCO1490 + HCO2198	CTmin	-6.4	2.4	Animalia	Arthropoda	Arachnida	Araneae	Dictynidae	Dictyna	Dictyna major	AAAAAGGTTGAATAAATAGGATCTCCTCCTCCTGCAGGATCAAAAAACGATGTATTAAAATTTCGATCAGTCAACAATATAGTAATAGCTCCTGCTAAAACAGGAAGAGACAATAATAAAAGAACAGCAGTAATTAAAACAGATCACACAAACAATGGAACCTTTTCTATTGTTATTCCCTCTATTCGTATATTAATAATAGTAGAAATAAAATTAATAGCTCCTATAATAGAAGAAGCACCAGCCAAATGTAAAGAAAAAATTGCAAAATCTACAGATCTGCCCGAATGTCCAACTAAGGAAGCCAAAGGAGGGTAAATAGTCCATCCCGCTCCAACACCTATCTCAACTATAGAAGAAATAAACAATAATAATAAAGAAGGAGGTAATAATCAAAAT…
Run 4, Sample 6	LCO1490 + HCO2198	CTmin		3.3	Animalia	Arthropoda	Arachnida	Araneae	Dictynidae	Dictyna	Dictyna major	GGTTGAATTAAATAGGGAATCTCCCCCTCCCGCAGGGTCAAAAAACGATGTATTAAAATTTCGATCAGTCAACAATATAGTAATAGCTCCCGCTAAAACAGGAAGAGACAATAATAAAAGAACAGCAGTAATTAAAACAGATCACACAAACAATGGAACTTTTTCTATTGTTATTCCTTCTATTCGTATATTAATAATAGTAGAAATAAAATTAATAGCTCCTATAATAGAAGAAGCACCAGCCAAATGTAAAGAAAAAATTGCAAAATCTACAGATCTACCCGAATGTCCAACTAGAGAAGCCAAAGGAGGGTAGATCGTCCATCCAGCCCCAACACCTATCTCAACCATAGAAGAAATAAACAATAATAATAAAGAAGGGGGTAGTAATCAAAATCT…
Run 4, Sample 66	BR2 + BF3	CTmin	-4.54	1.8	Animalia	Arthropoda	Arachnida	Araneae	Dictynidae	Dictyna	Dictyna major	AGTCAACAATATAGTAATAGCTCCTGCTAAAACAGGAAGAGACAATAATAAAAGAACAGCAGTAATTAAAACAGATCACACAAACAATGGAACTTTTTCTATTGTTATTCCTTCTATTCGTATATTAATAATAGTAGAAATAAAATTAATAGCTCCTATAATAGAAGAAGCACCAGCCAAATGTAAAGAAAAAATTGCAAAATCTACAGATCTACCCGAATGTCCAACTAAAGAAGCCAAAGGAGGGTAAATCGTCCATCCAGCCCCAACACCTATCTCAACCATAGAAGAAATAAACAATAATAATAAAGAAGGGGGTAATAATCAAAATCTTAAATTATTCATTCGGGGAAAGGCT
Run 5, Sample 43	BR2 + BF3	CTmax	43.46	2.8	Animalia	Arthropoda	Arachnida	Araneae	Dictynidae	Dictyna	Dictyna major	GATAATGGTTGAAATAAAATTAGGGATCTCCCCCTCCCGCAGGGTCAAAAAACGATGTATTAAAATTTCGATCAGTCAACAATATAGTAATAGCTCCCGCTAAAACAGGAAGAGACAATAATAAAAGAACAGCAGTAATTAAAACAGATCACACAAACAATGGAACTTTTTCTATTGTTATTCCTTCTATTCGTATATTAATAATAGTAGAAATAAAATTAATAGCTCCTATAATAGAAGAAGCACCAGCCAAATGTAAAGAAAAAATTGCAAAATCTACAGATCTACCCGAATGTCCAACTAGAGAAGCCAAAGGAGGGTAGATCGTCCATCCAGCCCCAACACCTATCTCAACCATAGAAGAAATAAACAATAATAATAAAGAAGGGGGTAGTAATC…
Run 5, Sample 43	LCO1490 + HCO2198	CTmax	43.46	2.8	Animalia	Arthropoda	Arachnida	Araneae	Dictynidae	Dictyna	Dictyna major	AAAAAGGTGAATAAATAGGATCTCCCCCTCCCGCAGGGTCAAAAAACGATGTATTAAAATTTCGATCAGTCAACAATATAGTAATAGCTCCCGCTAAAACAGGAAGAGACAATAATAAAAGAACAGCAGTAATTAAAACAGATCACACAAACAATGGAACTTTTTCTATTGTTATTCCTTCTATTCGTATATTAATAATAGTAGAAATAAAATTAATAGCTCCTATAATAGAAGAAGCACCAGCCAAATGTAAAGAAAAAATTGCAAAATCTACAGATCTACCCGAATGTCCAACTAGAGAAGCCAAAGGAGGGTAGATCGTCCATCCAGCCCCAACACCTATCTCAACCATAGAAGAAATAAACAATAATAATAAAGAAGGGGGTAGTAATCAAAATC…
Run 6, Sample 110	LCO1490 + HCO2198	CTmax	49.97	2	Animalia	Arthropoda	Arachnida	Araneae	Dictynidae	Dictyna	Dictyna major	AAAAAAGGTTGAAATAAAATAGGGATCTCCCTCCCTCCTGCAGGATCAAAAAACGATGTATTAAAATTTCGATCAGTCAACAATATAGTAATAGCTCCTGCTAAAACAGGTAAGAGACAATAATAAAAGAACAGCAGTAATTAAAACAGATCACACAAACAATGGAACCTTTTCTATTGTTATTCCCTCTATTCGTATATTAATAATAGTAGAAATAAAATTAATAGCTCCTATAAAGAAGAAGCACCAGCCAAATGTAAAGAAAAAATTGCAAAATCTACAGATCTCGCCCGTAATGTCCAACTAAGGAAGCCAAAGGAGGGTAAATAGTCCATCCCGCTCCAACACCTATCTCAACTATAGAAGAAATAAACAATAATAATAAAGAAGGAGGTAATA…	97.30 %
Run 6, Sample 31	LCO1490 + HCO2198	CTmax	49.05	2.7	Animalia	Arthropoda	Arachnida	Araneae	Dictynidae	Dictyna	Dictyna major	AGGTTGAATAAATAGGGATCCCCCCCTCCCGCAGGATCAAAAAATGATGTATTAAAATTTCGATCAGTCAACAATATAGTAATAGCTCCTGCTAAAACAGGAAGAGACAATAATAAAAGAACAGCAGTAATTAAAACAGATCACACAAACAATGGAACTTTTTCTATTGTTATTCCTTCTATTCGTATATTAATAATAGTAGAAATAAAATTAATAGCTCCTATAATAGAAGAAGCACCAGCCAAATGTAAAGAAAAAATTGCAAAATCTACAGATCTACCCGAATGTCCAACTAGAGAGGCCAAAGGAGGGTAAATCGTCCATCCAGCCCCAACACCTATCTCAACCATAGAAGAAATAAACAATAATAATAAAGAAGGGGGTAATAATCAAAATCTT…
Run 6, Sample 83	LCO1490 + HCO2198	CTmax	48.82	3	Animalia	Arthropoda	Arachnida	Araneae	Dictynidae	Dictyna	Dictyna major	AAAAAAGGTGAAATAAATAGGATCTCCCCCTCCCGCAGGGTCAAAAAACGATGTATTAAAATTTCGATCAGTCAACAATATAGTAATAGCTCCCGCTAAAACAGGAAGAGACAATAATAAAAGAACAGCAGTAATTAAAACAGATCACACAAACAATGGAACTTTTTCTATTGTTATTCCTTCTATTCGTATATTAATAATAGTAGAAATAAAATTAATAGCTCCTATAATAGAAGAAGCACCAGCCAAATGTAAAGAAAAAATTGCAAAATCTACAGATCTACCCGAATGTCCAACTAGAGAAGCCAAAGGAGGGTAGATCGTCCATCCAGCCCCAACACCTATCTCAACCATAGAAGAAATAAACAATAATAATAAAGAAGGGGGTAGTAATCAAAA…
Run 1, Sample 59	LCO1490 + HCO2198	CTmax	50.24	1.1	Animalia	Arthropoda	Arachnida	Araneae	Dictynidae	Emblyna	Emblyna borealis	AGGCTGAATAAATAGGGATCTCCTCCCCCGGGCAGGATCAAAAAAAGACGTATTAAAATTTCGATCCGTCAACAACATTGTAATAGCCCCGGCCAAAACCGGAAGCGATAACAACAAAAGAATAGCTGTAATTAACACCGATCAAACAAACAACGGTACTTTTTCCATAGTCATTCCCTCTATTCGTATATTAATAATAGTAGAAATAAAATTAATAGCCCCCATAATTGAAGAAGCCCCCGCTAAATGAAGAGAAAAAATAGCAAAATCCACAGAACTCCCTGAATGTCCAACCACAGAAGCCAAAGGAGGATAAATAGTTCACCCTGCCCCAACTCCTATCTCAACTATAGATGAAACAAACAACAATAATAAAGAAGGAGGTAACAATCAGAATCT…
Run 1, Sample 61	LCO1490 + HCO2198	CTmax	51.4	1.2	Animalia	Arthropoda	Arachnida	Araneae	Dictynidae	Emblyna	Emblyna borealis	AAAGGCTGAATAAATAGGGATCTCCTCCCCCGGGCAGGATCAAAAAAAGACGTATTAAAATTTCGATCCGTCAACAACATTGTAATAGCCCCGGCCAAAACCGGAAGCGATAACAACAAAAGAATAGCTGTGATTAACACCGATCAAACAAACAACGGTACTTTTTCCATAGTTATTCCCTCTATTCGTATATTAATAATAGTAGAAATAAAATTAATAGCCCCCATAATTGAAGAAGCCCCCGCTAAATGAAGAGAAAAAATAGCAAAATCCACAGAACTCCCTGAATGTCCAACCACAGAAGCCAAAGGAGGATAAATAGTTCACCCTGCCCCAACTCCTATCTCAACTATAGATGAAACAAACAACAATAATAAAGAAGGAGGTAACAATCAGAAT…
Run 4, Sample 103	LCO1490 + HCO2198	CTmin	-1.35	1	Animalia	Arthropoda	Arachnida	Araneae	Dictynidae	Emblyna	Emblyna borealis	AAGGTGAATAAATAGGATCTCCTCCCCCAGCAGGGTCAAAAAAAGACGTATTAAAATTTCGATCCGTCAACAACATTGTAATAGCCCCAGCCAAAACCGGAAGCGACAACAACAAAAGAATAGCCGTAATTAACACTGACCAAACAAACAACGGTACTTTTTCCATAGTTATTCCTTCTATTCGTATATTAATAATAGTAGAAATAAAATTAATAGCCCCCATAATTGAAGAAGCCCCAGCCAAATGAAGAGAAAAAATAGCAAAATCCACAGAACTCCCTGAATGTCCAACTACAGAAGCCAAAGGAGGATAAATAGTTCATCCTGCCCCAACTCCTATCTCAACTATAGATGAAACAAACAATAATAATAAAGAAGGAGGTAACAATCAAAATCTCA…
Run 4, Sample 25	LCO1490 + HCO2198	CTmin	0.11	1.5	Animalia	Arthropoda	Arachnida	Araneae	Dictynidae	Emblyna	Emblyna borealis	CTGAAATTAAATAGGGATCTCCTCCCCCGGGCAGGATCAAAAAAAGACGTATTAAAATTTCGATCCGTCAACAACATTGTAATAGCCCCGGCTAAAACCGGAAGCGATAACAACAAAAGAATAGCTGTGATTAACACCGATCAAACAAACAACGGTACTTTTTCCATAGTTATTCCCTCTATTCGTATATTAATAATAGTAGAAATAAAATTAATAGCCCCCATAATTGAAGAAGCCCCCGCTAAATGAAGAGAAAAAATAGCAAAATCCACAGAACTCCCTGAATGTCCAACCACAGAAGCCAAAGGAGGATAAATAGTTCACCCTGCCCCAACTCCTATCTCAACTATAGATGAAACAAACAACAATAATAAAGAAGGGGGTAACAATCAGAATCTC…
Run 6, Sample 111	LCO1490 + HCO2198	CTmax	51.09	1.5	Animalia	Arthropoda	Arachnida	Araneae	Dictynidae	Emblyna	Emblyna borealis	GGTGAATTAAATAGGGATCTCCTCCCCCGGGCAGGATCAAAAAAAGACGTATTAAAATTTCGATCCGTCAACAACATTGTAATAGCCCCGGCCAAAACCGGAAGCGATAACAACAAAAGAATAGCTGTGATTAACACCGATCAAACAAACAACGGTACTTTTTCCATAGTTATTCCCTCTATTCGTATATTAATAATAGTAGAAATAAAATTAATAGCCCCCATAATTGAAGAAGCCCCCGCTAAATGAAGAGAAAAAATAGCAAAATCCACAGAACTCCCTGAATGTCCAACCACAGAAGCCAAAGGAGGATAAATAGTTCACCCTGCCCCAACTCCTATCTCGACTATAGATGAAACAAACAACAATAATAAAGAAGGAGGTAACAATCAGAATCTC…
Run 6, Sample 112	LCO1490 + HCO2198	CTmax	51.21	1.2	Animalia	Arthropoda	Arachnida	Araneae	Dictynidae	Emblyna	Emblyna borealis	ATTAAAAGGTGAAATAAATAGGATCTCCTCCCCCAGCAGGGTCAAAAAAAGACGTATTAAAATTTCGATCCGTCAACAATATTGTAATAGCCCCAGCCAAAACCGGAAGCGATAACAACAAAAGAATAGCCGTAATTAACACTGACCAAACAAACAACGGTACTTTTTCCATAGTTATTCCTTCTATTCGTATATTAATAATAGTAGAAATAAAATTAATAGCCCCCATAATTGAAGAAGCTCCAGCCAAATGAAGAGAAAAAATAGCAAAATCCACAGAACTCCCTGAATGTCCAACTACAGAAGCCAAAGGAGGATAAATAGTTCATCCTGCCCCAACTCCTATCTCAACTATAGATGAAACAAACAATAATAATAAAGAAGGAGGTAACAATCAAA…
Run 6, Sample 46	LCO1490 + HCO2198	CTmax	44.31	8.5	Animalia	Arthropoda	Insecta	Araneae	Gnaphosidae	Haplodrassus	Haplodrassus signifer	AAAAAGTTGAATAAATAGGGATCCCCTCCTCCAGCTGGGTCAAAAAACGAAGTATTAAAATTACGATCTGTTAATAATATAGTAATGGCTCCAGCCAATACAGGTAATGATAATAATAATAGCACTGCTGTAATGAAAACAGATCAAACAAATAAAGGTACCTTCTCTATACTTATTCCTAAAGAACGCATATTAATTACAGTAGAAATAAAATTAATAGCCCCTATAATAGAAGAAGCACCAGCCAAATGTAAAGAAAAAATAGCAAAATCCATAGCTCTACCACTATGTCCTACAGAAGAAGCTAAAGGGGGATATACAGTTCACCCAGCTCCAACTCCCATTTCAACTATAGAAGAAACAAATAATAAAACTAAAGATGGGGGTAATAATCAAAAA…
Run 5, Sample 25	LCO1490 + HCO2198	CTmax	47.13	2.8	Animalia	Arthropoda	Insecta	Araneae	Theridiidae	Ohlertidion ohlerti	Ohlertidion ohlerti	AGGTTGAATAAATAGGGATCCCCACCCCCAGCAGGATCAAAGAAAGAAGTATTAAAATTTCGATCAGTTAATAATATAGTGATAGCACCTGCTAATACAGGTAATGATAATAATAGCAATACAGCAGTAATTAAAACTGATCAAACAAATAATGAAACTTTTTCTATTGTTATTCCGTATGAACGTATATTTAAAATAGTTGAAATAAAATTTACAGCTCCCATAATAGAAGAAGCACCTGCTAAATGAAGAGAAAAAATAGCAAAATCTACAGATCTACCACCATGTCCATCTAAAGAAGATAAAGGAGGATAAACAGTCCATCCAGTCCCTACCCCTACTTCTACTATAGAAGAAATAAATAATAAAATTAATGAAGGGGGTAATAATCAAAATCTT…
Run 3, Sample 29	BR2 + BF3	CTmin	-1.32	9	Animalia	Arthropoda	Insecta	Araneae	Lycosidae	Pardosa	Pardosa furcifera	CGGAATTCCCCTCCCTCCAGGCCAGGGTCAAAAAAAGAAGTATTAAAATTTCGATCTGTTAACAATATAGTAATAGCACCTGCTAAAACAGGTAAAGAAAGTAATAATAATACTGCTGTAATTAAAACTGATCATACAAAAAGAGGAACCTTTTCTATAGATATTCCTAATATCCGTATATTAATAATAGTAGAAATAAAATTTACAGCCCCTATAATAGAAGAAGCTCCAGCTAAATGAAGAGAAAAAATAGCAAAATCTATTGAACTTCCTATATGTCCAACCGTAGATGCCAAAGGAGGATAAACAGTTCATCCAGCCCCAACTCCTATTTCTACTATAGAAGATATAGATAATAAAAACAAAGAAGGTGGTAACAATCAAAAAGAAAGATTATTT…
Run 3, Sample 47	LCO1490 + HCO2198	CTmin	-6.2	9.8	Animalia	Arthropoda	Insecta	Araneae	Lycosidae	Pardosa	Pardosa furcifera	TTATTGGATCCCCTCCCTCCAGCAGGGTCAAAAAAAGAAGTATTAAAATTTCGATCTGTTAACAATATAGTAATAGCACCTGCTAAAACAGGTAAAGAAAGTAATAATAATACTGCTGTAATTAAAACTGATCATACAAAAAGAGGAACCTTTTCTATAGATATTCCTAATATCCGTATATTAATAATAGTAGAAATAAAATTTACAGCCCCTATAATAGAAGAAGCTCCAGCTAAATGAAGAGAAAAAATAGCAAAATCTATTGAACTTCCTATATGTCCAACCGTAGATGCCAAAGGAGGATAAACAGTTCATCCAGCCCCAACTCCTATTTCTACTATAGAAGATATAGATAATAAAAACAAAGAAGGTGGTAACAATCAAAAAGAAAGATTATTT…
Run 3, Sample 9	BR2 + BF3	CTmin	-5.9	8	Animalia	Arthropoda	Insecta	Araneae	Lycosidae	Pardosa	Pardosa furcifera	GAATAATTCTGCTGTAATTAAAACTGATCATACAAAAAGAGGAACCTTTTCTATAGATATTCCTAATATCCGTATATTAATAATAGGAGAAATAAAATTTACAGCCCCTATAAAAGAAGAAGCTCCAGCTAAATGAAGAGAAAAAATAGCAAAATCTATTGAACTTCCTATATGTCCAACCGTATATGCCAAAGGAGGATAAACAGTTCATCCAGCCCCAACTCCTATTTCTACTATAGAAGATATAGATAATAAAAACAAAGAAGGTGGTAACAATCAAAAAGAAAGATTATTTATTCGGGGAAAAGCCA
Run 5, Sample 81	LCO1490 + HCO2198	CTmax	46.21	8	Animalia	Arthropoda	Insecta	Araneae	Lycosidae	Pardosa	Pardosa furcifera	AAAAGTAATAATAATACTGCTGTAATTAAAACTGATCATACAAAAAGAGGAACCTTTTCTATAGATATTCCTAATATCCGTATATTAATAATAGTAGAAATAAAATTTACAGCCCCTATAATAGAAGAAGCTCCAGCTAAATGAAGAGAAAAAATAGCATAAATCTATTGAACTTCCTATATGTCCAACCGTTAGATGCCAAAGGAGGATAAACAGTT
Run 4, Sample 125	LCO1490 + HCO2198	CTmin	-1.86	11	Animalia	Arthropoda	Insecta	Araneae	Lycosidae	Pardosa	Pardosa groenlandica	AAAAAGGTTGAATAAATAGGGATCCCCTCCTCCAGCAGGGTCAAAAAAAGAAGTATTAAAATTTCGATCTGTTAACAATATAGTAATAGCACCTGCTAAAACAGGTAAAGAAAGTAATAATAATACTGCTGTAATTAAAACTGATCATACAAAAAGAGGAACCTTTTCTATAGACATCCCTAATATTCGTATATTAATAATAGTAGAAATAAAATTTACAGCCCCTATAATAGAAGAAGCTCCAGCTAAATGAAGAGAAAAAATAGCAAAATCTATTGAACTTCCTATATGCCCAACCGTAGATGCTAAAGGAGGATAAACAGTTCATCCAGCCCCAACTCCTATTTCTACTATAGAAGATATAGATAATAAAAACAAAGAAGGAGGTAATAATCAAAA…
Run 5, Sample 58	LCO1490 + HCO2198	CTmax	47.92	10.5	Animalia	Arthropoda	Insecta	Araneae	Lycosidae	Pardosa	Pardosa groenlandica	AGGTTGAAATAAATAGGGATCCCCTCCTCCAGCAGGGTCAAAAAAAGAAGTATTAAAATTTCGATCTGTTAACAATATAGTAATAGCACCTGCTAAAACAGGTAAAGAAAGTAATAATAATACTGCTGTAATTAAAACTGATCATACAAAAAGAGGAACCTTTTCTATAGACATCCCTAATATTCGTATATTAATAATAGTAGAAATAAAATTTACAGCCCCTATAATAGAAGAAGCTCCAGCTAAATGAAGAGAAAAAATAGCAAAATCTATTGAACTTCCTATATGCCCAACCGTAGATGCTAAAGGAGGATAAACAGTTCATCCAGCCCCAACTCCTATTTCTACTATAGAAGATATAGATAATAAAAACAAAGAAGGAGGTAATAATCAAAAAGA…
Run 6, Sample 121	LCO1490 + HCO2198	CTmax	47.02	9.3	Animalia	Arthropoda	Insecta	Araneae	Lycosidae	Pardosa	Pardosa groenlandica	GTTGAATAAATAGGGATCCCCTCCTCCAGCAGGGTCAAAAAAAGAAGTATTAAAATTTCGATCTGTTAACAATATAGTAATAGCACCTGCTAAAACAGGTAAAGAAAGTAATAATAATACTGCTGTAATTAAAACTGATCATACAAAAAGAGGAACCTTTTCTATAGACATCCCTAATATTCGTATATTAATAATAGTAGAAATAAAATTTACAGCCCCTATAATAGAAGAAGCTCCAGCTAAATGAAGAGAAAAAATAGCAAAATCTATTGAACTTCCTATATGCCCAACCGTAGATGCTAAAGGAGGATAAACAGTTCATCCAGCCCCAACTCCTATTTCTACTATAGAAGATATAGATAATAAAAACAAAGAAGGAGGTAATAATCAAAAAGAAAG…
Run 6, Sample 126	LCO1490 + HCO2198	CTmax	47.17	7.5	Animalia	Arthropoda	Insecta	Araneae	Lycosidae	Pardosa	Pardosa groenlandica	AAAGGTGGAATAAATAGGGATCCCCTCCTCCAGCAGGGTCAAAAAAAGAAGTATTAAAATTTCGATCTGTTAACAATATAGTAATAGCACCTGCTAAAACAGGTAAAGAAAGTAATAATAATACTGCTGTAATTAAAACTGATCATACAAAAAGAGGAACCTTTTCTATAGACATCCCTAATATTCGTATATTAATAATAGTAGAAATAAAATTTACAGCCCCTATAATAGAAGAAGCTCCAGCTAAATGAAGAGAAAAAATAGCAAAATCTATTGAACTTCCTATATGCCCAACCGTAGATGCTAAAGGAGGATAAACAGTTCATCCAGCCCCAACTCCTATTTCTACTATAGAAGATATAGATAATAAAAACAAAGAAGGAGGTAATAATCAAAAAG…
Run 6, Sample 139	LCO1490 + HCO2198	CTmax		11	Animalia	Arthropoda	Insecta	Araneae	Lycosidae	Pardosa	Pardosa groenlandica	AAAAAGGTGAATAAATAGGATCCCCTCCTCCAGCAGGGTCAAAAAAAGAAGTATTAAAATTTCGATCTGTTAACAATATAGTAATAGCACCTGCTAAAACAGGTAAAGAAAGTAATAATAATACTGCTGTAATTAAAACTGATCATACAAAAAGAGGAACCTTTTCTATAGACATCCCTAATATTCGTATATTAATAATAGTAGAAATAAAATTTACAGCCCCTATAATAGAAGAAGCTCCAGCTAAATGAAGAGAAAAAATAGCAAAATCTATTGAACTTCCTATATGCCCAACCGTAGATGCTAAAGGAGGATAAACAGTTCATCCAGCCCCAACTCCTATTTCTACTATAGAAGATATAGATAATAAAAACAAAGAAGGAGGTAATAATCAAAAAG…
Run 6, Sample 47	LCO1490 + HCO2198	CTmax	47.09	10	Animalia	Arthropoda	Insecta	Araneae	Lycosidae	Pardosa	Pardosa groenlandica	ATAAATAGGGATCCCCTCCTCCAGCAGGGTCAAAAAAAGAAGTATTAAAATTTCGATCTGTTAACAATATAGTAATAGCACCTGCTAAAACAGGTAAAGAAAGTAATAATAATACTGCTGTAATTAAAACTGATCATACAAAAAGAGGAACCTTTTCTATAGACATCCCTAATATTCGTATATTAATAATAGTAGAAATAAAATTTACAGCCCCTATAATAGAAGAAGCTCCAGCTAAATGAAGAGAAAAAATAGCAAAATCTATTGAACTTCCTATATGCCCAACCGTAGATGCTAAAGGAGGATAAACAGTTCATCCAGCCCCAACTCCTATTTCTACTATAGAAGATATAGATAATAAAAACAAAGAAGGAGGTAATAATCAAAAAGAAAGATTAT…
Run 5, Sample 89	LCO1490 + HCO2198	CTmax	43.79	8.5	Animalia	Arthropoda	Insecta	Araneae	Tetragnathidae	Tetragnatha	Tetragnatha extensa	AAAAAGGTTGGAAAGCACCGGGATCTCCCCCACCAGAAAGGATCAAAAAAAGAAGTATTAAAATTTCGGTCAGTTAACAATATAGTGATAGCCCCAGCTAAAACTGGAAGGGATAAAAGTAGTAACACCGCAGTAATTAACACAGATCACACAAATAATGGAACCTTTTCTATAGAAATCCCTCTTATCCGCATATTAATAATTGTGGAAATAAAATTAATGGCCCCTATAATAGAAGAAGCCCCAGCCAAATGAAGAGAAAAAATAGCAAAATCCACAGATCTCCCTGAATGCCCCTCCAAAGATGCTAAAGGAGGATAAACAGTTCAACCCGCTCCAACTCCTACATCCACCATAGATGAAATAAATAATATAAAGAGTGAGGGAGGTAAAAGTCAG…
Run 4, Sample 48	LCO1490 + HCO2198	CTmin	-5.82	2.5	Animalia	Arthropoda	Insecta	Araneae	Theridiidae	Theridion	Theridion ohlerti	TAAAGGTTGAATAAATAGGGATCCCCACCCCCAGCAGGATCAAAGAAAGAAGTATTAAAATTTCGATCAGTTAGTAATATAGTGATAGCACCTGCTAATACAGGTAATGATAATAATAGCAATACAGCAGTAATTAAAACTGATCAAACAAATAATGAAACTTTTTCTATTGTTATTCCGTATGAACGTATATTTAAAATAGTTGAAATAAAATTTACAGCTCCCATAATAGAAGAAGCACCTGCTAAATGAAGAGAAAAAATAGCAAAATCTACAGATCTACCACCATGTCCATCTAAAGAAGATAAAGGAGGATAAACAGTCCATCCAGTCCCTACCCCTACTTCTACTATAGAAGAAATAAATAATAAAATTAATGAAGGGGGTAATAATCAAAAT…
Run 1, Sample 15	LCO1490 + HCO2198	CTmax	48.83	3.2	Animalia	Arthropoda	Arachnida	Araneae	Thomisidae	Xysticus	Xysticus sp.	AAGGTTGAATAAATAGGGATCACCCTCCACCTGCAGGATCAAAAAAAGAAGTATTAAAATTACGATCCGTAAGCAATATAGTAATAGCCCCTGCTAAAACAGGTAAAGATAAAAGAAGTAAAATAGCAGTAATTAATACAGACCAAACAAATAATGGAACCCTCTCTATTGTTATTCCAGAAACTCGTATATTTACAATCGTAGAAATAAAATTTACAGCACCTATAATTGAAGAAGCACCAGCTAAATGAAGAGAAAAAATAGCAAAATCCATAGATCTCCCTATATGCCCTACACTAGAAGCTAACGGAGGATAAACAGTCCATCCAGCCCCAACACCTATTTCCACCAAAGAAGATATAAATAACAAAAACAATGAAGGAGGTAAAAGTCAAAAAG…
Run 1, Sample 17	LCO1490 + HCO2198	CTmax	46.83	2.5	Animalia	Arthropoda	Arachnida	Araneae	Thomisidae	Xysticus	Xysticus sp.	AAAAGGTGGAATAAATAGGGATCACCTCCACCTGCAGGATCAAAAAAAGAAGTATTAAAATTACGATCCGTAAGTAATATAGTAATAGCCCCTGCTAAAACAGGTAAAGATAAAAGAAGTAAAATAGCAGTAATTAATACAGACCAAACAAATAATGGAACCCTCTCTATTGTTATTCCAGAAACTCGTATATTTACAATCGTAGAAATAAAATTTACAGCACCTATAATTGAAGAAGCACCAGCTAAATGAAGAGAAAAAATAGCAAAATCCATAGATCTCCCTATATGCCCTACACTAGAAGCTAACGGAGGATAAACAGTCCATCCAGCTCCAACACCTATTTCCACCAAAGAAGATATAAATAACAAAAACAATGAAGGAGGTAAAAGTCAAAAA…
Run 1, Sample 19	LCO1490 + HCO2198	CTmax	47.93	1.6	Animalia	Arthropoda	Arachnida	Araneae	Thomisidae	Xysticus	Xysticus sp.	AAAAGGTGGAATAAAAAAGGATCACCTCCACCTGCAGGATCAAAAAAAGAAGTATTAAAATTACGATCCGTAAGCAATATAGTAATAGCCCCTGCTAAAACAGGTAAAGATAAAAGAAGTAAAATAGCAGTAATTAATACAGACCAAACAAATAATGGAACCCTCTCTATTGTTATTCCAGAAACTCGTATATTTACAATCGTAGAAATAAAATTTACAGCACCTATAATTGAAGAAGCACCAGCTAAATGAAGAGAAAAAATAGCAAAATCCATAGATCTCCCTATATGCCCTACACTAGAAGCTAACGGAGGATAAACAGTCCATCCAGCTCCAACGCCTATTTCCACCAAAGAAGATATAAATAACAAAAACAATGAAGGAGGTAAAAGTCAAAAA…
Run 1, Sample 2	LCO1490 + HCO2198	CTmax	49.38	3.45	Animalia	Arthropoda	Arachnida	Araneae	Thomisidae	Xysticus	Xysticus sp.	AAAAGGTGGAATAAATAGGGATCACCCTCCACCTGCAGGATCAAAAAAAGAAGTATTAAAATTACGATCCGTAAGCAATATAGTAATAGCCCCTGCTAAAACAGGTAAAGATAAAAGAAGTAAAATAGCAGTAATTAATACAGACCAAACAAATAATGGAACCCTCTCTATTGTTATTCCAGAAACTCGTATATTTACAATCGTAGAAATAAAATTTACAGCACCTATAATTGAAGAAGCACCAGCTAAATGAAGAGAAAAAATAGCAAAATCCATAGATCTCCCTATATGCCCTACACTAGAAGCTAACGGAGGATAAACAGTCCATCCAGCTCCAACACCTATTTCCACCAAAGAAGATATAAATAACAAAAACAATGAAGGAGGTAAAAGTCAAAA…
Run 1, Sample 37	LCO1490 + HCO2198	CTmax	50.36	4.5	Animalia	Arthropoda	Arachnida	Araneae	Thomisidae	Xysticus	Xysticus sp.	AAAGGTGGAATAAATAGGGATCACCCTCCACCTGCAGGATCAAAAAAAGAAGTATTAAAATTACGATCCGTAAGCAATATAGTAATAGCCCCTGCTAAAACAGGCAAAGATAAAAGAAGTAAAATAGCAGTAATTAATACAGACCAAACAAATAATGGAACCCTCTCTATTGTTATTCCAGAAACTCGTATATTTACAATCGTAGAAATAAAATTTACAGCACCTATAATTGAAGAAGCTCCAGCTAAATGAAGAGAAAAAATAGCAAAATCCATAGATCTCCCTATATGCCCTACACTAGAAGCTAACGGAGGATAAACAGTCCATCCAGCTCCAACACCTATTTCCACCAAAGAAGATATAAATAACAAAAACAATGAAGGAGGTAAAAGTCAAAAA…
Run 1, Sample 39	LCO1490 + HCO2198	CTmax	49.21	3	Animalia	Arthropoda	Arachnida	Araneae	Thomisidae	Xysticus	Xysticus sp.	GTGGAATAAATAGGGATCACCCTCCACCTGCAGGATCAAAAAAAGAAGTATTAAAATTACGATCCGTAAGCAATATAGTAATAGCCCCTGCTAAAACAGGTAAAGATAAAAGAAGTAAAATAGCAGTAATTAATACAGACCAAACAAATAATGGAACCCTCTCTATTGTTATTCCAGAAACTCGTATATTTACAATCGTAGAAATAAAATTTACAGCTCCTATAATTGAAGAAGCACCAGCTAAATGAAGAGAAAAAATAGCAAAATCCATAGATCTCCCTATATGCCCTACACTAGAAGCTAACGGAGGATAAACAGTCCATCCAGCTCCAACACCTATTTCCACCAAAGAAGATATAAATAACAAAAACAATGAAGGAGGTAAAAGTCAAAAAGATA…
Run 1, Sample 46	LCO1490 + HCO2198	CTmax	50.59	3.9	Animalia	Arthropoda	Arachnida	Araneae	Thomisidae	Xysticus	Xysticus sp.	GGTGGAATAAATAGGGATCACCCTCCCACCCTGCAGGATCAAAAAAAGAAGTATTAAAATTACGATCCGTAAGCAATATAGTAATAGCCCCTGCTAAAACAGGTAAAGATAAAAGAAGTAAAATAGCAGTAATTAATACAGACCAAACAAATAATGGAACCCTCTCTATTGTTATTCCAGAAACTCGTATATTTACAATCGTAGAAATAAAATTTACAGCTCCTATAATTGAAGAAGCACCAGCTAAATGAAGAGAAAAAATAGCAAAATCCATAGATCTCCCTATATGCCCTACACTAGAAGCTAACGGAGGATAAACAGTCCATCCAGCTCCAACACCTATTTCCACCAAAGAAGATATAAATAACAAAAACAATGAAGGAGGTAAAAGTCAAAAAG…
Run 1, Sample 51	LCO1490 + HCO2198	CTmax	48.9	1.2	Animalia	Arthropoda	Arachnida	Araneae	Thomisidae	Xysticus	Xysticus sp.	GTGGAATAAATAGGGATCACCTCCACCCTGCAGGATCAAAAAAAGAAGTATTAAAATTACGATCCGTAAGCAATATAGTAATAGCCCCTGCTAAAACAGGTAAAGATAAAAGAAGTAAAATAGCAGTAATTAATACAGACCAAACAAATAATGGAACCCTCTCTATTGTTATTCCAGAAACTCGTATATTTACAATCGTAGAAATAAAATTTACAGCTCCTATAATTGAAGAAGCACCAGCTAAATGAAGAGAAAAAATAGCAAAATCCATAGATCTCCCTATATGCCCTACACTAGAAGCTAACGGAGGATAAACAGTCCATCCAGCTCCAACACCTATTTCCACCAAAGAAGATATAAATAACAAAAACAATGAAGGAGGTAAAAGTCAAAAAGATA…
Run 1, Sample 70	LCO1490 + HCO2198	CTmax	49.53	3.7	Animalia	Arthropoda	Arachnida	Araneae	Thomisidae	Xysticus	Xysticus sp.	AGGTGGAATAAATAGGGATCACCTCCACCTGCAGGATCAAAAAAAGAAGTATTAAAATTACGATCCGTAAGCAATATAGTAATAGCCCCTGCTAAAACAGGTAAAGATAAAAGAAGTAAAATAGCAGTAATTAATACAGACCAAACAAATAATGGAACCCTCTCTATTGTTATTCCAGAAACTCGTATATTTACAATCGTAGAAATAAAATTTACAGCACCTATAATTGAAGAAGCACCAGCTAAATGAAGAGAAAAAATAGCAAAATCCATAGATCTCCCTATATGCCCTACACTAGAAGCTAACGGAGGATAAACAGTCCATCCAGCTCCAACACCTATTTCCACCAAAGAAGATATAAATAACAAAAACAATGAAGGAGGTAAAAGTCAAAAAGAT…
Run 1, Sample 82	LCO1490 + HCO2198	CTmax	50.26	4.6	Animalia	Arthropoda	Arachnida	Araneae	Thomisidae	Xysticus	Xysticus sp.	ATGTGGAATAAATAGGGATCACCCTCCACCTGCAGGATCAAAAAAAGAAGTATTAAAATTACGATCCGTAAGCAATATAGTAATAGCCCCTGCTAAAACAGGCAAAGATAAAAGAAGTAAAATAGCAGTAATTAATACAGACCAAACAAATAATGGAACCCTCTCTATTGTTATTCCAGAAACTCGTATATTTACAATCGTAGAAATAAAATTTACAGCACCTATAATTGAAGAAGCACCAGCTAAATGAAGAGAAAAAATAGCAAAATCCATAGATCTCCCTATATGCCCTACACTAGAAGCTAACGGAGGATAAACAGTCCATCCAGCTCCAACACCTATTTCCACCAAAGAAGATATAAATAACAAAAACAATGAAGGAGGTAAAAGTCAAAAAGA…
Run 2, Sample 17	LCO1490 + HCO2198	CTmin	-4.61	3	Animalia	Arthropoda	Arachnida	Araneae	Thomisidae	Xysticus	Xysticus sp.	TTGGAAAAAATAGGGATCACCTCCACCCTGCAGGATCAAAAAAAGAAGTATTAAAATTACGATCCGTAAGCAATATAGTAATAGCCCCTGCTAAAACAGGTAAAGATAAAAGAAGTAAAATAGCAGTAATTAATACAGACCAAACAAATAATGGAACCCTCTCTATTGTTATTCCAGAAACTCGTATATTTACAATCGTAGAAATAAAATTTACAGCACCTATAATTGAAGAAGCACCAGCTAAATGAAGAGAAAAAATAGCAAAATCCATAGATCTCCCTATATGCCCTACACTAGAAGCTAACGGAGGATAAACAGTCCATCCAGCTCCAACACCTATTTCCACCAAAGAAGATATAAATAACAAAAACAATGAAGGAGGTAAAAGTCAAAAAGATA…
Run 2, Sample 32	LCO1490 + HCO2198	CTmin	-4.12	3	Animalia	Arthropoda	Arachnida	Araneae	Thomisidae	Xysticus	Xysticus sp.	AAAAAGGTTGAAATAAATAGGGATCACCTCCACCTGCAGGATCAAAAAAAGAAGTATTAAAATTACGATCCGTAAGCAATATAGTAATAGCCCCTGCTAAAACAGGTAAAGATAAAAGAAGTAAAATAGCAGTAATTAATACAGACCAAACAAATAATGGAACCCTCTCTATTGTTATTCCAGAAACTCGTATATTTACAATCGTAGAAATAAAATTTACAGCTCCTATAATTGAAGAAGCACCAGCTAAATGAAGAGAAAAAATAGCAAAATCCATAGATCTCCCTATATGCCCTACACTAGAAGCTAACGGAGGATAAACAGTCCATCCAGCTCCAACACCTATTTCCACCAAAGAAGATATAAATAACAAAAACAATGAAGGAGGTAAAAGTCAAA…
Run 3, Sample 110	LCO1490 + HCO2198	CTmin	-6.2	3.5	Animalia	Arthropoda	Arachnida	Araneae	Thomisidae	Xysticus	Xysticus sp.	GGTTGAAAAAATAGGGATCACCCTCCACCCTGCAGGATCAAAAAAAGAAGTATTAAAATTACGATCCGTAAGTAACATAGTAATAGCCCCTGCTAAAACAGGTAAAGATAAAAGAAGTAAAATAGCAGTAATTAATACGGACCAAACAAATAACGGAACCCTCTCTATTGTTATTCCAGAAACTCGTATATTTACAATCGTAGAAATAAAATTTACAGCACCTATAATTGAAGAAGCACCAGCTAAATGAAGAGAAAAAATAGCAAAATCCATAGATCTCCCTATATGCCCTACACTAGAAGCTAACGGAGGATAAACAGTCCATCCAGCTCCAACACCTATTTCCACCAAAGAAGATATAAATAACAAAAACAATGAAGGGGGTAAAAGTCAAAAAGA…
Run 3, Sample 97	LCO1490 + HCO2198	CTmin	-1.47	2	Animalia	Arthropoda	Arachnida	Araneae	Thomisidae	Xysticus	Xysticus sp.	GTTGAATTAAATAGGGATCACCCTCCACCCTGCAGGATCAAAAAAAGAAGTATTAAAATTACGATCCGTAAGCAATATAGTAATAGCCCCTGCTAAAACAGGTAAAGATAAAAGAAGTAAAATAGCAGTAATTAATACAGACCAAACAAATAATGGAACCCTCTCTATTGTTATTCCAGAAACTCGTATATTTACAATCGTAGAAATAAAATTTACAGCTCCTATAATTGAAGAAGCACCAGCTAAATGAAGAGAAAAAATAGCAAAATCCATAGATCTCCCTATATGCCCTACACTAGAAGCTAACGGAGGATAAACAGTCCATCCAGCTCCAACACCTATTTCCACCAAAGAAGATATAAATAACAAAAACAATGAAGGAGGTAAAAGTCAAAAAGA…
Run 4, Sample 100	LCO1490 + HCO2198	CTmin	-5.02	3	Animalia	Arthropoda	Arachnida	Araneae	Thomisidae	Xysticus	Xysticus sp.	TCCGTCTGCCATCTGGCCCGAATATCTTTTAAGATTTGTTGACCAGATCCGTAAGCAATATAGTAATAGCCCCTGCTAAAACAGGTAAAGATAAAAGAAGTAAAATAGCAGTAATTAATACAGACCAAACAAATAATGGAACCCTCTCTATTGTTATTCCAGAAACTCGTATATTTACAATCGTAGAAATAAAATTTACAGCACCTATAATTGAAGAAGCACCAGCTAAATGAAGAGAAAAAATAGCAAAATCCATAGATCTCCCTATATGCCCTACACTAGAAGCTAACGGAGGATAAACAGTCCATCCAGCTCCAACACCTATTTCCACCAAAGAAGATATAAATAACAAAAACAATGAAGGAGGTAAAAGTCAAAAAGATAAATTATTTATCCGCG…
Run 4, Sample 111	LCO1490 + HCO2198	CTmin	-4	6	Animalia	Arthropoda	Arachnida	Araneae	Thomisidae	Xysticus	Xysticus sp.	AGGTTGAAATAAATAGGGATCACCCTCCACCCTGCAGGATCAAAAAAAGAAGTATTAAAATTACGATCCGTAAGCAATATAGTAATAGCCCCTGCTAAAACAGGTAAAGATAAAAGAAGTAAAATAGCAGTAATTAATACAGACCAAACAAATAATGGAACCCTCTCTATTGTTATTCCAGAAACTCGTATATTTACAATCGTAGAAATAAAATTTACAGCACCTATAATTGAAGAAGCACCAGCTAAATGAAGAGAAAAAATAGCAAAATCCATAGATCTCCCTATATGCCCTACACTAGAAGCTAACGGAGGATAAACAGTCCATCCAGCTCCAACACCTATTTCCACCAAAGAAGATATAAATAACAAAAACAATGAAGGAGGTAAAAGTCAAAAA…
Run 4, Sample 135	LCO1490 + HCO2198	CTmin	-3.38	4.2	Animalia	Arthropoda	Arachnida	Araneae	Thomisidae	Xysticus	Xysticus sp.	GTGGAATAAATAGGGATCACCCTCCACCCTGCAGGATCAAAAAAAGAAGTATTAAAATTACGATCCGTAAGCAATATAGTAATAGCCCCTGCTAAAACAGGTAAAGATAAAAGAAGTAAAATAGCAGTAATTAATACGGACCAAACAAATAATGGAACCCTCTCTATTGTTATTCCAGAAACTCGTATATTTACAATCGTAGAAATAAAATTTACAGCACCTATAATTGAAGAAGCACCAGCTAAATGAAGAGAAAAAATAGCAAAATCCATAGATCTCCCTATATGCCCTACACTAGAAGCTAACGGAGGATAAACAGTCCATCCAGCTCCAACACCTATTTCCACCAAAGAAGATATAAATAACAAAAACAATGAAGGAGGTAAAAGTCAAAAAGAT…
Run 4, Sample 22	LCO1490 + HCO2198	CTmin	-5.38	2	Animalia	Arthropoda	Arachnida	Araneae	Thomisidae	Xysticus	Xysticus sp.	AGGTTGAATAAATAGGGATCACCTCCACCCTGCAGGATCAAAAAAAGAAGTATTAAAATTACGATCCGTAAGCAATATAGTAATAGCCCCTGCTAAAACAGGTAAAGATAAAAGAAGTAAAATAGCAGTAATTAATACAGACCAAACAAATAATGGAACCCTCTCTATTGTTATTCCAGAAACTCGTATATTTACAATCGTAGAAATAAAATTTACAGCTCCTATAATTGAAGAAGCACCAGCTAAATGAAGAGAAAAAATAGCAAAATCCATAGATCTCCCTATATGCCCTACACTAGAAGCTAACGGAGGATAAACAGTCCATCCAGCTCCAACACCTATTTCCACCAAAGAAGATATAAATAACAAAAACAATGAAGGAGGTAAAAGTCAAAAAGA…
Run 4, Sample 5	LCO1490 + HCO2198	CTmin		3	Animalia	Arthropoda	Arachnida	Araneae	Thomisidae	Xysticus	Xysticus sp.	ATAAATAGGGATCACCCTCCACCCTGCAGGATCAAAAAAAGAAGTATTAAAATTACGATCCGTAAGTAATATAGTAATAGCCCCTGCTAAAACAGGTAAAGATAAAAGAAGTAAAATAGCAGTAATTAATACAGACCAAACAAATAATGGAACCCTCTCTATTGTTATTCCAGAAACTCGTATATTTACAATCGTAGAAATAAAATTTACAGCACCTATAATTGAAGAAGCACCAGCTAAATGAAGAGAAAAAATAGCAAAATCCATAGATCTCCCTATATGTCCTACACTAGAAGCTAATGGAGGATAAACAGTCCATCCAGCTCCAACACCTATTTCCACCAAAGAAGATATAAATAACAAAAACAATGAAGGAGGTAAAAGTCAAAAAGATAAATT…
Run 4, Sample 62	LCO1490 + HCO2198	CTmin		2	Animalia	Arthropoda	Arachnida	Araneae	Thomisidae	Xysticus	Xysticus sp.	TCACCTTCCCCCTGCCGGATCAAAAAAAGAAGTATTAAAATTACGATCCGTAAGTAATATAGTAATAGCCCCTGCTAAAACAGGTAAAGATAAAAGAAGTAAAATAGCAGTAATTAATACAGACCAAACAAATAATGGAACCCTCTCTATTGTTATTCCAGAAACTCGTATATTTACAATCGTAGAAATAAAATTTACAGCACCTATAATTGAAGAAGCACCAGCTAAATGAAGAGAAAAAATAGCAAAATCCATAGATCTCCCTATATGCCCTACACTAGAAGCTAACGGAGGATAAACAGTCCATCCAGCTCCAACACCTATTTCCACCAAAGAAGATATAAATAACAAAAACAATGAAGGAGGTAAAAGTCAAAAAGATAAATTATTTATCCGCGG…
Run 4, Sample 64	LCO1490 + HCO2198	CTmin	-2.11	2.8	Animalia	Arthropoda	Arachnida	Araneae	Thomisidae	Xysticus	Xysticus sp.	AAAGGTTGAATAAATAGGGATCACCCTCCACCTGCAGGATCAAAAAAAGAAGTATTAAAATTACGATCCGTAAGCAATATAGTAATAGCCCCTGCTAAAACAGGTAAAGATAAAAGAAGTAAAATAGCAGTAATTAATACAGACCAAACAAATAATGGAACCCTCTCTATTGTTATTCCAGAAACTCGTATATTTACAATCGTAGAAATAAAATTTACAGCTCCTATAATTGAAGAAGCACCAGCTAAATGAAGAGAAAAAATAGCAAAATCCATAGATCTCCCTATATGCCCTACACTAGAAGCTAACGGAGGATAAACAGTCCATCCAGCTCCAACACCTATTTCCACCAAAGAAGATATAAATAACAAAAACAATGAAGGAGGTAAAAGTCAAAAA…
Run 4, Sample 77	LCO1490 + HCO2198	CTmin	-3.59	3.8	Animalia	Arthropoda	Arachnida	Araneae	Thomisidae	Xysticus	Xysticus sp.	AAAAATGTTGAAATAAATAGGGATCACCTCCACCTGCAGGATCAAAAAAAGAAGTATTAAAATTACGATCCGTAAGCAATATAGTAATAGCCCCTGCTAAAACAGGTAAAGATAAAAGAAGTAAAATAGCAGTAATTAATACAGACCAAACAAATAATGGAACCCTCTCTATTGTTATTCCAGAAACTCGTATATTTACAATCGTAGAAATAAAATTTACAGCTCCTATAATTGAAGAAGCACCAGCTAAATGAAGAGAAAAAATAGCAAAATCCATAGATCTCCCTATATGCCCTACACTAGAAGCTAACGGAGGATAAACAGTCCATCCAGCTCCAACACCTATTTCCACCAAAGAAGATATAAATAACAAAAACAATGAAGGAGGTAAAAGTCAAA…
Run 4, Sample 83	LCO1490 + HCO2198	CTmin	-3.73	3.3	Animalia	Arthropoda	Arachnida	Araneae	Thomisidae	Xysticus	Xysticus sp.	AAAAAGGTTGAAATAAATAGGGATCACCCTCCACCTGCAGGATCAAAAAAAGAAGTATTAAAATTACGATCCGTAAGCAATATAGTAATAGCCCCTGCTAAAACAGGTAAAGATAAAAGAAGTAAAATAGCAGTAATTAATACAGACCAAACAAATAATGGAACCCTCTCTATTGTTATACCAGAAACTCGTATATTTACAATCGTAGAAATAAAATTTACAGCACCTATAATTGAAGAAGCACCAGCTAAATGAAGAGAAAAAATAGCAAAATCTATAGATCTCCCTATATGCCCTACACTAGAAGCTAACGGAGGATAAACAGTCCATCCAGCTCCAACACCTATTTCCACCAAAGAAGATATAAATAACAAAAACAATGAAGGAGGTAAAAGTCAA…
Run 5, Sample 122	LCO1490 + HCO2198	CTmax	48.59	3.5	Animalia	Arthropoda	Arachnida	Araneae	Thomisidae	Xysticus	Xysticus sp.	ATAAATAGGGATCACCTCCACCCTGCAGGATCAAAAAAAGAAGTATTAAAATTACGATCCGTAAGCAATATAGTGATAGCCCCTGCTAAAACAGGCAAAGATAAAAGAAGTAAAATAGCAGTAATTAATACAGACCAAACAAATAATGGAACCCTCTCTATTGTTATTCCAGAAACTCGTATATTTACAATCGTAGAAATAAAATTTACAGCACCTATAATTGAAGAAGCTCCAGCTAAATGAAGAGAAAAAATAGCAAAATCCATAGATCTCCCTATATGCCCTACACTAGAAGCTAACGGAGGATAAACAGTCCATCCAGCTCCAACACCTATTTCCACCAAAGAAGATATAAATAACAAAAACAATGAAGGAGGTAAAAGTCAAAAAGATAAATTA…
Run 5, Sample 128	LCO1490 + HCO2198	CTmax	34.31	6.5	Animalia	Arthropoda	Arachnida	Araneae	Thomisidae	Xysticus	Xysticus sp.	AAAAAGGTTGAAATAAATAGGGATCACCCTCCACCTGCAGGATCAAAAAAAGAAGTATTAAAATTACGATCCGTAAGCAATATAGTAATAGCCCCTGCTAAAACAGGCAAAGATAAAAGAAGTAAAATAGCAGTAATTAATACAGACCAAACAAATAATGGAACCCTCTCTATTGTTATTCCAGAAACTCGTATATTTACAATCGTAGAAATAAAATTTACAGCACCTATAATTGAAGAAGCTCCAGCTAAATGAAGAGAAAAAATAGCAAAATCCATAGATCTCCCTATATGCCCTACACTAGAAGCTAACGGAGGATAAACAGTCCATCCAGCTCCAACACCTATTTCCACCAAAGAAGATATAAATAACAAAAACAATGAAGGAGGTAAAAGTCAA…
Run 5, Sample 15	LCO1490 + HCO2198	CTmax	48.76	4.3	Animalia	Arthropoda	Arachnida	Araneae	Thomisidae	Xysticus	Xysticus sp.	TAAAGGTTGAATAAATAGGGATCACCCTCCACCCTGCAGGATCAAAAAAAGAAGTATTAAAATTACGATCCGTAAGCAATATAGTAATAGCCCCTGCTAAAACAGGTAAAGATAAAAGAAGTAAAATAGCAGTAATTAATACAGACCAAACAAATAATGGAACCCTCTCTATTGTTATTCCAGAAACTCGTATATTTACAATCGTAGAAATAAAATTTACAGCACCTATAATTGAAGAAGCACCAGCTAAATGAAGAGAAAAAATAGCAAAATCCATAGATCTCCCTATATGCCCTACACTAGAAGCTAACGGAGGATAAACAGTCCATCCAGCTCCAACACCTATTTCCACCAAAGAAGATATAAATAACAAAAACAATGAAGGAGGTAAAAGTCAAA…
Run 5, Sample 39	LCO1490 + HCO2198	CTmax	48.52	3.8	Animalia	Arthropoda	Arachnida	Araneae	Thomisidae	Xysticus	Xysticus sp.	AAAAGGTTGAATAAATAGGGATCACCCTCCACCTGCAGGATCAAAAAAAGAAGTATTAAAATTACGATCCGTAAGCAATATAGTAATAGCCCCTGCTAAAACAGGTAAAGATAAAAGAAGTAAAATAGCAGTAATTAATACAGACCAAACAAATAATGGAACCCTCTCTATTGTTATTCCAGAAACTCGTATATTTACAATCGTAGAAATAAAATTTACAGCTCCTATAATTGAAGAAGCACCAGCTAAATGAAGAGAAAAAATAGCAAAATCCATAGATCTCCCTATATGCCCTACACTAGAAGCTAACGGAGGATAAACAGTCCATCCAGCTCCAACACCTATTTCCACCAAAGAAGATATAAATAACAAAAACAATGAAGGAGGTAAAAGTCAAAA…
Run 5, Sample 40	LCO1490 + HCO2198	CTmax	50	5	Animalia	Arthropoda	Arachnida	Araneae	Thomisidae	Xysticus	Xysticus sp.	AAAAAGGTTGAATAAATAGGGATCACCCTCCACCTGCAGGATCAAAAAAAGAAGTATTAAAATTACGATCCGTAAGTAATATAGTAATAGCCCCTGCTAAAACAGGTAAAGATAAAAGAAGTAAAATAGCAGTAATTAATACAGACCAAACAAATAATGGAACCCTCTCTATTGTTATTCCAGAAACTCGTATATTTACAATCGTAGAAATAAAATTTACAGCACCTATAATTGAAGAAGCACCAGCTAAATGAAGAGAAAAAATAGCAAAATCCATAGATCTCCCTATATGCCCTACACTAGAAGCTAATGGAGGATAAACAGTCCATCCAGCTCCAACACCTATTTCCACCAAAGAAGATATAAATAACAAAAACAATGAAGGAGGTAAAAGTCAAA…
Run 6, Sample 100	LCO1490 + HCO2198	CTmax	48.94	1.5	Animalia	Arthropoda	Arachnida	Araneae	Thomisidae	Xysticus	Xysticus sp.	CGGAGAAATAAAATTTACAGCACCTATAATTGAAGAAGCACCAGCTAAATGAAGAGAAAAAATAGCAAAATCCATAGATCTCCCTATATGCCCTACACTAGAAGCTAACGGAGGATAAACAGTCCATCCCGCTCCCACACCTATTTCCACCAAAGAAGATATAAATAACAAAAACAATGAAGGAGGTAAAAGTCAAAAAGATATATTATTTATCCGCGGAAAAGACATATCAGGAGCCCCTAATATTAAAGGT
Run 6, Sample 118	LCO1490 + HCO2198	CTmax	50.11	8	Animalia	Arthropoda	Arachnida	Araneae	Thomisidae	Xysticus	Xysticus sp.	TATTTAAAATAGCAGTAATTAATACAGACCAAACAAATAATGGAACCCTCTCTATTGTTATTCCAGAAACTCGTATATTTACAATCGTAGAAATAAAATTTACAGCTCCTATAATTGAAGAAGCACCAGCTAAATGAAGAGAAAAAATAGCAAAATCCATAGATCTCCCTATATGCCCTACACTAGAAGCTAACGGAGGATAAACAGTCCATCCAGCTCCAACACCTATTTCCACCAAAGAAGATATAAATAACAAAAACAATGAAGGAGGTAAAAGTCAAAAAGATAAATTATTTATCCGCGGAAAAGATATATCAGGAGCCCCTAATATTAAAGGTACTAACCAATTTCCAAAACCACCAATTAAAATTGGTATTACTATAAAAAAAATTATAACAA…
Run 6, Sample 130	LCO1490 + HCO2198	CTmax	42.03	6.5	Animalia	Arthropoda	Insecta	Chilopoda	Henicopidae	Lamyctes	Lamyctes emarginatus	TGAAGAGATCAAAGAATCTTGTATTAAAATTTCGGTCTGTTAATAATATTGTAATTGCCCCTGCAAGAACCGGAAGTGAGAGAAGAAGTAAAATAGCTGTGATTTTTACAGCTCATACAAAAAGAGGTATTCGTTCGAAGACTATTCCTCTTGTTCGTATATTAATAATTGTTGTAATAAAATTAATAGCTCCTAAAATAGAGGAAATTCCTGCTAAATGAAGGGAAAAAATTGTTATATCTACAGAGCCCCCACTATGTGATATTCCTGCAGCAAGAGGGGGGTATACTGTTCACCCTGTCCCTGCCCCATTTTCTACTGCTGCTGAACCTAATAGCAATATGAATGAGGGTGGAAGTAGTCAAAATCTTATATTATTAAGTCGAGGGAATGCCATAT…
Run 6, Sample 18	LCO1490 + HCO2198	CTmax	43.23	6.5	Animalia	Arthropoda	Insecta	Chilopoda	Henicopidae	Lamyctes	Lamyctes sp.	AAATAGATGGGGGTCTCCTCCCCCAGCAGGATCAAAGAATCTTGTATTAAAATTTCGGTCTGTTAATAATATTGTAATTGCCCCTGCAAGAACCGGGAGTGAGAGAAGAAGTAAAATAGCTGTGATTTTTACAGCTCATACAAAAAGAGGTATTCGTTCGAAGACTATTCCTCTTGTTCGTATATTAATAATTGTTGTAATAAAATTAATAGCTCCTAAAATAGAGGAAACTCCTGCTAAATGAAGGGAAAAAATTGTTATATCTACAGAGCCCCCACTATGTGATATTCCTGCAGCAAGAGGGGGGTATACTGTTCACCCTGTCCCTGCCCCATTTTCTACTGATGCTGAACCTAATAGTAATATGAATGAGGGTGGAAGTAGTCAAAATCTTATATT…
Run 6, Sample 72	LCO1490 + HCO2198	CTmax	42.36	5.7	Animalia	Arthropoda	Insecta	Chilopoda	Henicopidae	Lamyctes	Lamyctes sp.	TAAGGAATGGGGGTCTCCTCCCCCAGCAGGATCAAAGAATCTTGTATTAAAATTTCGGTCTGTTAATAATATTGTAATTGCCCCTGCAAGAACCGGGAGTGAGAGAAGAAGTAAAATAGCTGTGATTTTTACAGCTCATACAAAAAGAGGTATTCGTTCGAAGACTATTCCTCTTGTTCGTATATTAATAATTGTTGTAATAAAATTAATAGCTCCTAAAATAGAGGAAACTCCTGCTAAATGAAGGGAAAAAATTGTTATATCTACAGAGCCCCCACTATGTGATATTCCTGCAGCAAGAGGGGGGTATACTGTTCACCCTGTCCCTGCCCCATTTTCTACTGATGCTGAACCTAATAGTAATATGAATGAGGGTGGAAGTAGTCAAAATCTTATATT…
Run 6, Sample 1	LCO1490 + HCO2198	CTmax	42.11	4.6	Animalia	Arthropoda	Insecta	Coleoptera	Carabidae	Bembidion	Bembidion grapii	TTAAGAATTGGGATCTCCTCCTCCTGCTGGGTCAAAAACGAAGTATTTAGATTTCGATCTGTTAAAAGTATAGTAATAGCTCCTGCTAAAACAGGAAGAGAAAGTAATAATAATAATGCTGTAATTCCTACTGATCATACAAATAATGGTATTCGATCAAATCTTATTCCAATTGATCGTATATTGATAATAGTAGTAATAAAGTTTACTGCACCTAAAATTGAAGATACACCTGCAAGGTGTAATCTAAAAATTGCTAGATCTACGGATGCTCCTCTATGGGCAATAGAAGATGATAGCGGAGGGTAAACTGTTCATCCTGTCCCTGCACCTCTTTCAACTATAGAACTCATCAAAAGTAATCTTAATGAAGGAGGTAGTAATCAGAATCTTATATTA…
Run 6, Sample 128	LCO1490 + HCO2198	CTmax	40.97	4.2	Animalia	Arthropoda	Insecta	Coleoptera	Carabidae	Bembidion	Bembidion grapii	CATGCCACCCTCCTGCTGGGTCAAAAACGAAGTATTTAGATTTCGATCTGTTAAAAGTATAGTAATAGCTCCTGCTAAAACAGGAAGAGAAAGTAATAATAATAATGCTGTAATTCCTACTGATCATACAAATAATGGTATTCGATCAAATCTTATTCCAATTGATCGTATATTGATAATAGTAGTAATAAAGTTTACTGCACCTAAAATTGAAGATACACCTGCAAGGTGTAATCTAAAAATTGCTAGATCTACGGATGCTCCTCTATGGGCAATAGAAGATGATAGCGGAGGGTAAACTGTTCATCCTGTCCCTGCACCTCTTTCAACTATAGAACTCATCAAAAGTAATCTTAATGAAGGAGGTAGTAATCAGAATCTTATATTATTTATTCGAGG…
Run 6, Sample 129	LCO1490 + HCO2198	CTmax	40.97	3.9	Animalia	Arthropoda	Insecta	Coleoptera	Carabidae	Bembidion	Bembidion grapii	ATTAAGATTGGGATCTCCTCCTCCTGCTGGGTCAAAAACGAAGTATTTAGATTTCGATCTGTTAAAAGTATAGTAATAGCTCCTGCTAAAACAGGAAGAGAAAGTAATAATAATAATGCTGTAATTCCTACTGATCATACAAATAATGGTATTCGATCAAATCTTATTCCAATTGATCGTATATTGATAATAGTAGTAATAAAGTTTACTGCACCTAAAATTGAAGATACACCTGCAAGGTGTAATCTAAAAATTGCTAGATCTACGGATGCTCCTCTATGGGCAATAGAAGATGATAGCGGAGGGTAAACTGTTCATCCTGTCCCTGCACCTCTTTCAACTATAGAACTCATCAAAAGTAATCTTAATGAAGGAGGTAGTAATCAGAATCTTATATTA…
Run 6, Sample 131	LCO1490 + HCO2198	CTmax	41.04	4.3	Animalia	Arthropoda	Insecta	Coleoptera	Carabidae	Bembidion	Bembidion grapii	TTAAGAATTGGGATCTCCTCCTCCTGCTGGGTCAAAAACGAAGTATTTAGATTTCGATCTGTTAAAAGTATAGTAATAGCTCCTGCTAAAACAGGAAGAGAAAGTAATAATAATAATGCTGTAATTCCTACTGATCATACAAATAATGGTATTCGATCAAATCTTATTCCAATTGATCGTATATTGATAATAGTAGTAATAAAGTTTACTGCACCTAAAATTGAAGATACACCTGCAAGGTGTAATCTAAAAATTGCTAGATCTACGGATGCTCCTCTATGGGCAATAGAAGATGATAGCGGAGGGTAAACTGTTCATCCTGTCCCTGCACCTCTTTCAACTATAGAACTCATCAAAAGTAATCTTAATGAAGGAGGTAGTAATCAGAATCTTATATTA…
Run 6, Sample 9	LCO1490 + HCO2198	CTmax	45.02	7	Animalia	Arthropoda	Insecta	Coleoptera	Byrrhidae	Byrrhus	Byrrhus fasciatus	GTGGGTAAGAATTGGGGTCTCCCCTCCAGCTGGGATCAAAAATGAAGTATTTACGTTTCGATCTGTTAATAGTATTGTGATTGCCCCAGCAAGAACAGGAAGGGATAGTAGTAATAAAAGGGCTGTGATTACTACTGATCATGAAAAAAGAGATATTTGATCAAACGATATTCCTGGTGATCGCATATTAATAACTGTAGAAATGAAGTTTACTGCTCCAAGAATTGAAGAAATTCCAGCAAGATGAAGCCTAAAAATTGCAAGATCTACAGATGATCCTCTATGAGCAATATTAGCTGATAAAGGTGGATAAACAGTTCACCCTGTTCCTGCCCCTCTTTCTACAACTCTTCTTATTAAAAGTAAAGATAATGATGGTGGTAACAGCCAGAATCTTAT…
Run 2, Sample 49	LCO1490 + HCO2198	CTmin	-3.27	4.7	Animalia	Arthropoda	Insecta	Coleoptera	Coccinellidae	Coccinella	Coccinella transversoguttata	GTTAAGAATTGGGGTCGCCTCCTCCTATAGGATCAAAAAAAGAAGTATTAATATTTCGATCTGTTAATAATATTGTAATTGCTCCTGCAAGCACAGGTAATGATAATAAAAGTAAAATAGCAGTAATTAATACTGATCATACAAATAAAGGGGTTTTATCTAAATTTATTCCAAAGGGGCGTATATTTATAATAGTAGAAATAAAATTAACAGCTCCTAAAATAGAAGAAATTCCAGCTAAGTGTAATCTAAAAATTACTAAATCTACTGAAGGTCCATTATGGGCTAAATTAGAGGATAATGGCGGATAAACAGTTCAACCAGTTCCTGCGCCTATTTCAACTAATCTTCTAATAATTAGTAAAGTTAAAGCAGGAGGTAATAATCAAAATCTTATAT…
Run 4, Sample 28	LCO1490 + HCO2198	CTmin	-3.04	5.5	Animalia	Arthropoda	Insecta	Coleoptera	Coccinellidae	Coccinella	Coccinella transversoguttata	GGTAAGGAATTGGGGTCGCCTCCTCCTATAGGATCAAAAAAAGAAGTATTAATATTTCGATCTGTTAATAATATTGTAATTGCTCCTGCAAGCACAGGTAATGATAATAAAAGTAAAATAGCAGTAATTAATACTGATCATACAAATAAAGGGGTTTTATCTAAATTTATTCCAAAGGGGCGTATATTTATAATAGTAGAAATAAAATTAACAGCTCCTAAAATAGAAGAAATTCCAGCTAAGTGTAATCTAAAAATTACTAAATCTACTGAAGGTCCATTATGGGCTAAATTAGAGGATAATGGCGGATAAACAGTTCAACCAGTTCCTGCACCTATTTCAACTAATCTTCTAATAATTAGTAAAGTTAAAGCAGGAGGTAATAATCAAAATCTTATA…
Run 4, Sample 36	LCO1490 + HCO2198	CTmin		5.6	Animalia	Arthropoda	Insecta	Coleoptera	Coccinellidae	Coccinella	Coccinella transversoguttata	TAAGGAATTGGGGTCGCCTCCTCCTATAGGATCAAAAAAAGAAGTATTAATATTTCGATCTGTTAATAATATTGTAATTGCTCCTGCAAGCACAGGTAATGATAATAAAAGTAAAATAGCAGTAATTAATACTGATCATACAAATAAAGGGGTTTTATCTAAATTTATTCCAAAGGGGCGTATATTTATAATAGTAGAAATAAAATTAACAGCTCCTAAAATAGAAGAAATTCCAGCTAAGTGTAATCTAAAAATTACTAAATCTACTGAAGGTCCATTATGGGCTAAATTAGAGGATAATGGCGGATAAACAGTTCAACCAGTTCCTGCACCTATTTCAACTAATCTTCTAATAATTAGTAAAGTTAAAGCAGGAGGTAATAATCAAAATCTTATATT…
Run 5, Sample 18	LCO1490 + HCO2198	CTmax	49.17	5.9	Animalia	Arthropoda	Insecta	Coleoptera	Coccinellidae	Coccinella	Coccinella transversoguttata	GGGTGGGTAAGAATTGGGGTCGCCTCCTCCTATAGGATCAAAAAAAGAAGTATTAATATTTCGATCTGTTAATAATATTGTAATTGCTCCTGCAAGCACAGGTAATGATAATAAAAGTAAAATAGCAGTAATTAATACTGATCATACAAATAAAGGGGTTTTATCTAAATTTATTCCAAAGGGGCGTATATTTATAATAGTAGAAATAAAATTAACAGCTCCTAAAATAGAAGAAATTCCAGCTAAGTGTAATCTAAAAATTACTAAATCTACTGAAGGTCCATTATGGGCTAAATTAGAGGATAATGGCGGATAAACAGTTCAACCAGTTCCTGCACCTATTTCAACTAATCTTCTAATAATTAGTAAAGTTAAAGCAGGAGGTAATAATCAAAATCT…
Run 6, Sample 10	LCO1490 + HCO2198	CTmax	47.1	5.3	Animalia	Arthropoda	Insecta	Coleoptera	Coccinellidae	Coccinella	Coccinella transversoguttata	AAAAAGGGTGGGTAAGAATTGGGGTCGCCTCCTCCTATAGGATCAAAAAAAGAAGTATTAATATTTCGATCTGTTAATAATATTGTAATTGCTCCTGCAAGCACAGGTAATGATAATAAAAGTAAAATAGCAGTAATTAATACTGATCATACAAATAAAGGGGTTTTATCTAAATTTATTCCAAAGGGGCGTATATTTATAATAGTAGAAATAAAATTAACAGCTCCTAAAATAGAAGAAATTCCAGCTAAGTGTAATCTAAAAATTACTAAATCTACTGAAGGTCCATTATGGGCTAAATTAGAGGATAATGGCGGATAAACAGTTCAACCAGTTCCTGCACCTATTTCAACTAATCTTCTAATAATTAGTAAAGTTAAAGCAGGAGGTAATAATCAA…
Run 6, Sample 37	LCO1490 + HCO2198	CTmax	49.42	5.6	Animalia	Arthropoda	Insecta	Coleoptera	Coccinellidae	Coccinella	Coccinella transversoguttata	GGGGTAAGAATTGGGGTCGCCCCCTCCTATAGGATCAAAAAAAGAAGTATTAATATTTCGATCTGTTAATAATATTGTAATTGCTCCTGCAAGCACAGGTAATGATAATAAAAGTAAAATAGCAGTAATTAATACTGATCATACAAATAAAGGGGTTTTATCTAAATTTATTCCAAAGGGGCGTATATTTATAATAGTAGAAATAAAATTAACAGCTCCTAAAATAGAAGAAATTCCAGCTAAGTGTAATCTAAAAATTACTAAATCTACTGAAGGTCCATTATGGGCTAAATTAGAGGATAATGGCGGATAAACAGTTCAACCAGTTCCTGCACCTATTTCAACTAATCTTCTAATAATTAGTAAAGTTAAAGCAGGAGGTAATAATCAAAATCTTAT…
Run 5, Sample 101	LCO1490 + HCO2198	CTmax	41.78	5.8	Animalia	Arthropoda	Insecta	Coleoptera	Gyrinidae	Gyrinus	Gyrinus opacus	ATTAAATAGGGATCCCCTCCTCCTGCAGGGTCAAAAATGAGGTATTTAAATTTCGATCTGTTAATAATATAGTAATAGCTCCTGCTAAAACAGGTAAAGATAATAATAATAATAATGCTGTAATTCCTACAGATCAAACAAATAAAGGTATTCGATCTAAAGTTATCCCAACGGATCGTATATTAATAATTGTAGTAATAAAATTTACAGCTCCTAAAATTGATGAAATTCCGGCTAAATGTAGTCTAAAAATTGCTAAATCAACTGAAGCTCCTCCATGAGCAATATTAGAAGAAAGAGGTGGGTAAACAGTTCATCCTGTTCCTGCACCATTTTCAACTATTCTGCTCATCAGTAATAATGTTAATGAGGGAGGTAATAATCAAAATCTTATATTAT…
Run 5, Sample 102	LCO1490 + HCO2198	CTmax	36.64	6	Animalia	Arthropoda	Insecta	Coleoptera	Gyrinidae	Gyrinus	Gyrinus opacus	AAATTAAATAGGATCCCCTCCTCCTGCAGGGTCAAAAATGAGGTATTTAAATTTCGATCTGTTAATAATATAGTAATAGCTCCTGCTAAAACAGGTAAAGATAATAATAATAATAATGCTGTAATTCCTACAGATCAAACAAATAAAGGTATTCGATCTAAAGTTATCCCAACGGATCGTATATTAATAATTGTAGTAATAAAATTTACAGCTCCCAAAATTGATGAAATTCCGGCTAAATGTAGTCTAAAAATTGCTAAATCAACTGAAGCTCCCCCATGAGCAATATTAGAAGAAAGAGGTGGGTAAACAGTTCATCCTGTTCCTGCACCATTTTCAACTATTCTGCTCATCAGTAATAATGTTAATGAAGGAGGTAATAATCAAAATCTTATATTA…
Run 5, Sample 103	LCO1490 + HCO2198	CTmax	37.23	4.9	Animalia	Arthropoda	Insecta	Coleoptera	Gyrinidae	Gyrinus	Gyrinus opacus	TGTTGAATTAAATAGGATCCCCTCCTCCTGCAGGGTCAAAAATGAGGTATTTAAATTTCGATCTGTTAATAATATAGTAATAGCTCCTGCTAAAACAGGTAAAGATAATAATAATAATAATGCTGTAATTCCTACAGATCAAACAAATAAAGGTATTCGATCTAAAGTTATCCCAACGGATCGTATATTAATAATTGTAGTAATAAAATTTACAGCTCCCAAAATTGATGAAATTCCGGCTAAATGTAGTCTAAAAATTGCTAAATCAACTGAAGCTCCTCCATGAGCAATATTAGAAGAAAGAGGTGGGTAAACAGTTCATCCTGTTCCTGCACCATTTTCAACTATTCTGCTCATCAGTAATAATGTTAATGAAGGAGGTAATAATCAAAATCTTAT…
Run 5, Sample 104	LCO1490 + HCO2198	CTmax	37.23	6	Animalia	Arthropoda	Insecta	Coleoptera	Gyrinidae	Gyrinus	Gyrinus opacus	TTAAAATAGGGATCCCCTCCTCCTGCAGGGTCAAAAATGAGGTATTTAAATTTCGATCTGTTAATAATATAGTAATAGCTCCTGCTAAAACAGGTAAAGATAATAATAATAATAATGCTGTAATTCCTACAGATCAAACAAATAAAGGTATTCGATCTAAAGTTATCCCAACGGATCGTATATTAATAATTGTAGTAATAAAATTTACAGCTCCCAAAATTGATGAAATTCCGGCTAAATGTAGTCTAAAAATTGCTAAATCAACTGAAGCTCCTCCATGAGCAATATTAGAAGAAAGAGGTGGGTAAACAGTTCATCCTGTTCCTGCACCATTTTCAACTATTCTGCTCATCAGTAATAATGTTAATGAAGGAGGTAATAATCAAAATCTTATATTAT…
Run 5, Sample 107	BR2 + BF3	CTmax	38.71	3.8	Animalia	Arthropoda	Insecta	Coleoptera	Dytiscidae	Hydroporus	Hydrophorus morio	CCCTTCCGATCAGTTACAAGTATTGTGATTGCCCCCGCTAATACTGGAAGAGAAAGTAATAATAATAAAGCTGTAATTCCTACTGATCATACAAATAAAGGTATTCGATCAAAAGTTATTCCAATTGATCGTATATTAATAATTGTAGTAATAAAATTTACAGCCCCTAAAATTGAAGATACTCCTGCTAAGTGTAATCTAAAAATAGCTAAATCTACAGAAGCTCCTCTATGGGCAATCCCTGATGATAAAGGGGGATATACAGTTCATCCGGTTCCCGCACCATTTTCTACTATTCTTCTTATTAATAATAATCTTAATGATGGGGGGAGTAGTCAAAATCTTATATTATTTATTCGGGGAAAGGCTATGTCGGGGCAATATCAGCACCAACAGAAA…
Run 6, Sample 138	LCO1490 + HCO2198	CTmax	38.31	5.8	Animalia	Arthropoda	Insecta	Coleoptera	Carabidae	Nebria	Nebria rufescens	AGGATTGGGATCTCCTCCTCCAGCAGGGTCAAAGAAAGTTGTATTTAAGTTTCGATCAGTTAAAAGTATAGTGATTGCTCCAGCTAGAACGGGTAAAGATAAAAGTAATAGTAATGCAGTAATTCCGACTGATCAAACAAAAAGAGGTATCCGATCAAATGTTATTCCCATTGATCGTATATTAATAATTGTAGTAATAAAGTTAACTGCACCTAAAATAGAAGATACTCCTGCTAAGTGTAATCTAAAAATAGCTATATCGACAGATGCTCCACTATGGGCAATTCCGGATGATAAAGGAGGGTAAACAGTTCACCCAGTTCCTGCTCCTCTTTCTACTATTGAACTTATTAAAAGTAGTGTTAATGAAGGTGGGAGAAGTCAAAAACTTATGTTATT…
Run 6, Sample 65	LCO1490 + HCO2198	CTmax	38.44	8.8	Animalia	Arthropoda	Insecta	Coleoptera	Carabidae	Nebria	Nebria rufescens	AAAAGGATTGGGATCTCCTCCTCCAGCAGGGTCAAAGAAAGTTGTATTTAAGTTTCGATCAGTTAAAAGTATAGTGATTGCTCCAGCTAGAACGGGTAAAGATAAAAGTAATAGTAATGCAGTAATTCCGACTGATCAAACAAAAAGAGGTATCCGATCAAATGTTATTCCCATTGATCGTATATTAATAATTGTAGTAATAAAGTTAACTGCACCTAAAATAGAAGATACTCCTGCTAAGTGTAATCTAAAAATAGCTATATCGACAGATGCTCCACTATGGGCAATTCCGGATGATAAAGGAGGGTAAACAGTTCACCCAGTTCCTGCTCCTCTTTCTACTATTGAACTTATTAAAAGTAGTGTTAATGAAGGTGGGAGAAGTCAAAAACTTATGTT…
Run 6, Sample 70	LCO1490 + HCO2198	CTmax	38.31	5.5	Animalia	Arthropoda	Insecta	Coleoptera	Carabidae	Nebria	Nebria rufescens	TAAAGAATTGGGAATCTCCTCCCTCCAGCAGGGTCAAAGAAAGTATGTATTTAAGTTTCGATCAGTTAAAAGTATAGTGATTGCTCCAGCTAGAACGGGTAAAGATAAAAGTAATAGTAATGCAGTAATTCCGACTGATCAAACAAAAAGAGGTATCCGATCAAATGTTATTCCCATTGATCGTATATTAATAATTGTAGTAATAAAGTTAACTGCACCTAAAATAGAAGATACTCCTGCTAAGTGTAATCTAAAAATAGCTATATCGACAGATGCTCCACTATGGGCAATTCCGGATGATAAAGGAGGGTAAACAGTTCACCCAGTTCCTGCTCCTCTTTCTACTATTGAACTTATTAAAAGTAGTGTTAATGAAGGTGGGAGAAGTCAAAAACTTAT…
Run 6, Sample 71	LCO1490 + HCO2198	CTmax	38.31	5.2	Animalia	Arthropoda	Insecta	Coleoptera	Carabidae	Nebria	Nebria rufescens	GAATTGGGATCTCCTCCTCCAGCAGGGTCAAAGAAAGTTGTATTTAAGTTTCGATCAGTTAAAAGTATAGTGATTGCTCCAGCTAGAACGGGTAAAGATAAAAGTAATAGTAATGCAGTAATTCCGACTGATCAAACAAAAAGAGGTATCCGATCAAATGTTATTCCCATTGATCGTATATTAATAATTGTAGTAATAAAGTTAACTGCACCTAAAATAGAAGATACTCCTGCTAAGTGTAATCTAAAAATAGCTATATCGACAGATGCTCCACTATGGGCAATTCCGGATGATAAAGGAGGGTAAACAGTTCACCCAGTTCCTGCTCCTCTTTCTACTATTGAACTTATTAAAAGTAGTGTTAATGAAGGTGGGAGAAGTCAAAAACTTATGTTATTT…
Run 1, Sample 60	LCO1490 + HCO2198	CTmax	45.04	7	Animalia	Arthropoda	Insecta	Coleoptera	Curculionidae	Otiorhyncus	Otiorhynchus arcticus	AAAGGGTTGGGTAAGAATAGGGTCTCCGCCTCCGGCTGGGTCAAAAAAGATGTATTTACATTACGGTCAGTAAGTAGTATTGTAATAGCTCCTGCTAAAACGGGTAGAGATAGCAAAAGTAGAATTGCTGTAATTTTAACAGCTCAAATAAATAAAGTTATACGATCAGGGGATATGCCATTTGGACGTATATTAACTACGGTAGAGATAAAGTTAATGGCTCCTAAAATTGAGGATACCCCTGCTATATGAAGGCTAAAAATAGCTAGGTCTACGGATACCCCTTCGTGGGCAATATTAGAAGAAAGAGGTGGATAAACTGTTCACCCAGTTCCAGCCCCCTTATCGATAATTCTTCTTATTAAAAGAAGTCTTAGAGATGGAGGTAGAAGTCAAAAT…
Run 6, Sample 12	LCO1490 + HCO2198	CTmax	45.03	6.1	Animalia	Arthropoda	Insecta	Coleoptera	Curculionidae	Otiorhyncus	Otiorhynchus arcticus	AGAATAGGATCTCCCGCCCTCCGGGCCTGGGTCAAAAAAGATGTATTTACATTACGGTCAGTAAGTAGTATTGTAATAGCTCCTGCTAAAACGGGTAGAGATAGCAAAAGTAGAATTGCTGTAATTTTAACAGCTCAAATAAATAAAGTTATACGATCAGGGGATATGCCATTTGGACGTATATTAACTACGGTAGAGACAAAGTTAATGGCTCCTAAAATTGAGGATACCCCTGCTATATGAAGGCTAAAAATAGCTAGGTCTACGGATGCCCCTTCGTGGGCAATATTAGAAGAAAGAGGTGGATAAACTGTTCACCCAGTTCCGGCCCCCTTATCGATAATTCTTCTTATTAAAAGAAGTCTTAGAGATGGAGGTAGAAGTCAAAATCTTATATTG…
Run 6, Sample 17	LCO1490 + HCO2198	CTmax	42.29	7.5	Animalia	Arthropoda	Insecta	Coleoptera	Curculionidae	Otiorhyncus	Otiorhynchus arcticus	TAAGGAATAGGGTCTCCGCCTCCGGCTGGGTCAAAAAAGATGTATTTACATTACGGTCAGTAAGTAGTATTGTAATAGCTCCTGCTAAAACGGGTAGAGATAGCAAAAGTAGAATTGCTGTAATTTTAACAGCTCAAATAAATAAAGTTATACGATCAGGGGATATGCCATTTGGACGTATATTAACTACGGTAGAGATAAAGTTAATGGCTCCTAAAATTGAGGATACCCCTGCTATATGAAGGCTAAAAATAGCTAGGTCTACGGATGCCCCTTCGTGGGCAATATTAGAAGAAAGAGGTGGATAAACTGTTCACCCAGTTCCAGCCCCCTTATCGATAATTCTTCTTATTAAAAGAAGTCTTAGAGATGGAGGTAGAAGTCAAAATCTTATATTGT…
Run 4, Sample 68	LCO1490 + HCO2198	CTmin	3.79	7.5	Animalia	Arthropoda	Insecta	Coleoptera	Curculionidae	Otiorhyncus	Otiorhynchus nodosus	GGTGGTTAAAATTGGGATCCCCTCCCCCAGCGGGGTCAAAAAAGGAAGTATTAATATTTCGGTCAGTAAGAAGTATTGTGATTGCTCCTGCTAATACTGGCAGAGATAGTAAAAGTAGAATAGCAGTAATTTTTACAGATCAAATAAAAAGAGATATGCGGTCAGGTGTTATACCTCTTGGACGTATGTTAATAGCAGTAGAAATAAAATTAATAGCCCCTAAAATGGAGGAAATTCCTGCTATATGTAATCTAAAAATTGCTAGGTCTACTGAGGCTCCCTCATGAGAGATATTGGAAGATAATGGGGGGTAAACCGTTCAACCTGTTCCGGATCCTTTATCAATAATTCTTCTTATTAATAATAGGGATAGAGAGGGTGGGAGCAGTCAAAATCTTA…
Run 6, Sample 132	LCO1490 + HCO2198	CTmax	42.18	8	Animalia	Arthropoda	Insecta	Coleoptera	Curculionidae	Otiorhyncus	Otiorhynchus nodosus	GGTGGGTTAAATTGGGATCCCCTCCCCCAGCGGGGTCAAAAAAGGAAGTATTAATATTTCGGTCAGTAAGAAGTATTGTGATTGCTCCTGCTAATACTGGCAGAGATAGTAAAAGTAGAATAGCAGTAATTTTTACAGATCAAATAAAAAGAGATATGCGGTCAGGTGTTATACCTCTTGGACGTATGTTAATAGCAGTAGAAATAAAATTAATAGCCCCTAAAATGGAGGAAATTCCTGCTATATGTAATCTAAAAATTGCTAGGTCTACTGAGGCTCCCTCATGAGAGATATTGGAAGATAATGGGGGGTAAACCGTTCAACCTGTTCCGGATCCTTTATCAATAATTCTTCTTATTAATAATAGGGATAGAGAGGGTGGGAGCAGTCAAAATCTTA…
Run 6, Sample 134	LCO1490 + HCO2198	CTmax	42.18	8	Animalia	Arthropoda	Insecta	Coleoptera	Curculionidae	Otiorhyncus	Otiorhynchus nodosus	GTTGGGTTAAATTGGGATCCCCTCCCCCAGCGGGGTCAAAAAGGAAGTATTAATATTTCGGTCAGTAAGAAGTATTGTGATTGCTCCTGCTAATACTGGCAGAGATAGTAAAAGTAGAATAGCAGTAATTTTTACAGATCAAATAAAAAGAGATATGCGGTCAGGTGTTATACCTCTTGGACGTATGTTAATAGTAGTAGAAATAAAATTAATAGCCCCTAAAATGGAGGAAATTCCTGCTATATGTAATCTAAAAATTGCTAGGTCTACTGAGGCTCCCTCATGAGAGATATTGGAAGATAATGGGGGGTAAACCGTTCAACCTGTTCCGGATCCTTTATCAATAATTCTTCTTATTAATAATAGGGATAGAGAGGGTGGGAGCAGTCAAAATCTTAT…
Run 6, Sample 34	LCO1490 + HCO2198	CTmax	42.46	9	Animalia	Arthropoda	Insecta	Coleoptera	Carabidae	Patrobus	Patrobus septentrionis	GGTGGGTTAAATTGGGATCTCCTCCTCCAGCAGGGTCAAAAAATGAAGTATTTAAATTTCGATCAGTTAATAATATTGTAATTGCTCCTGCTAATACTGGTAATGATAAAAGTAAAAGTAGAGCTGTAATCCCCACTGATCACACAAATAAAGGTATTCGATCAAAAGATATTCCTACTGATCGTATGTTAATAATAGTTGTAATAAAATTTACAGCACCTAAAATAGAAGAAATTCCAGCTAAATGTAATCTAAAAATTGCTAAATCTACAGATGCCCCACTATGGGCAATACCAGAAGATAGCGGGGGGTACACAGTTCATCCTGTCCCAGCTCCACTTTCTACCATTCTTCTTATTAATAAAAGAGTTAATGAAGGAGGTAAAAGTCAAAATCTCA…
Run 6, Sample 7	LCO1490 + HCO2198	CTmax	40.07	8	Animalia	Arthropoda	Insecta	Coleoptera	Carabidae	Patrobus	Patrobus septentrionis	AGGGTGGTATAATTGGGATCTCCTCCTCCAGCAGGGTCAAAAAATGAAGTATTTAAATTTCGATCAGTTAATAATATTGTAATTGCTCCTGCTAATACTGGTAATGATAAAAGTAAAAGTAGAGCTGTAATCCCCACTGATCACACAAATAAAGGTATTCGATCAAAAGATATTCCTACTGATCGTATGTTAATAATAGTTGTAATAAAATTTACAGCACCTAAAATAGAAGAAATTCCAGCTAAATGTAATCTAAAAATTGCTAAATCTACAGATGCCCCACTATGGGCAATACCAGAAGATAGCGGGGGGTACACAGTTCATCCTGTCCCAGCTCCACTTTCTACCATTCTTCTTATTAATAAAAGAGTTAATGAAGGAGGTAAAAGTCAAAATCTC…
Run 1, Sample 79	BR2 + BF3	CTmax	41.38	6.6	Animalia	Arthropoda	Insecta	Diptera	Anthomyiidae	Botanophila	Botanophila profuga	TGGGTTAAAAATTGGGAACTCCTCCTCCTGCTGGGATCAAAAAATGAAGTATTTAAATTTCGATCTGTTAGTAATATAGTAATAGCTCCTGCTAAAACTGGTAAAGATAATAAAAGTAATAAAGCTGTAATTACTACAGATCATACAAATAATGGTATTCGATCAAAAGTAATTCCTGTTGATCGTATATTAATTACAGTTGTAATAAAATTTACGGCTCCTAAAATTGAAGAAATTCCGGCTAAATGTAAAGAAAAAATAGCTAAATCAACAGAAGCTCCGCCATGAGCAATATTAGAAGATAAAGGAGGATAAACAGTTCATCCTGTACCAGCTCCGTTTTCTACTATACTGCTTACTAATAATAAAGTTAATGCAGGAGGTAAAAGTCAAAATCTT…
Run 2, Sample 5	BR2 + BF3	CTmin	-3.39	5	Animalia	Arthropoda	Insecta	Diptera	Anthomyiidae	Botanophila	Botanophila profuga	TTGGGTTACTCCTCCTCCTGCTGGATCAAAAAATGAAGTATTTAAATTTCGATCTGTTAGTAATATAGTAATAGCTCCTGCTAAAACTGGTAAAGATAATAAAAGTAATAAAGCTGTAATTACTACAGATCATACAAATAATGGTATTCGATCAAAAGTAATTCCTGTTGATCGTATATTAATTACAGTTGTAATAAAATTTACGGCTCCTAAAATTGAAGAAATTCCGGCTAAATGTAAAGAAAAAATAGCTAAATCAACAGAAGCTCCGCCATGAGCAATATTAGAAGATAAAGGAGGATAAACAGTTCATCCTGTACCAGCTCCGTTTTCTACTATACTGCTTACTAATAATAAAGTTAATGCAGGAGGTAAAAGTCAAAATCTTATATTATTTAT…
Run 2, Sample 97	BR2 + BF3	CTmin	-4.63	4.1	Animalia	Arthropoda	Insecta	Diptera	Anthomyiidae	Botanophila	Botanophila profuga	ATAAAGTTGGATACTCCTCCTCCCTGCTGGGATCAAAAATGAAGTATTTAAATTTCGATCTGTTAGTAATATAGTAATAGCTCCTGCTAAAACTGGTAAAGATAATAAAAGTAATAAAGCTGTAATTACTACAGATCATACAAATAATGGTATTCGATCAAAAGTAATTCCTGTTGATCGTATATTAATTACAGTTGTAATAAAATTTACGGCTCCTAAAATTGAAGAAATTCCGGCTAAATGTAAAGAAAAAATAGCTAAATCAACAGAAGCTCCGCCATGAGCAATATTAGAAGATAAAGGAGGATAAACAGTTCATCCTGTACCAGCTCCGTTTTCTACTATACTGCTTACTAATAATAAAGTTAATGCAGGAGGTAAAAGTCAAAATCTTATATT…
Run 4, Sample 59	LCO1490 + HCO2198	CTmin	-4.49	5	Animalia	Arthropoda	Insecta	Diptera	Anthomyiidae	Botanophila	Botanophila profuga	AGGTGGGTAAAATTGGGATCTCCTCCTCCTGCTGGGATCAAAAATGAAGTATTTAAATTTCGATCTGTTAGTAATATAGTAATAGCTCCTGCTAAAACTGGTAAAGATAATAAAAGTAATAAAGCTGTAATTACTACAGATCATACAAATAATGGTATTCGATCAAAAGTAATTCCTGTTGATCGTATATTAATTACAGTTGTAATAAAATTTACGGCTCCTAAAATTGAAGAAATTCCGGCTAAATGTAAAGAAAAAATAGCTAAATCAACAGAAGCTCCGCCATGAGCAATATTAGAAGATAAAGGAGGATAAACAGTTCATCCTGTACCAGCTCCGTTTTCTACTATACTGCTTACTAATAATAAAGTTAATGCAGGAGGTAAAAGTCAAAATCTT…
Run 5, Sample 10	BR2 + BF3	CTmax	27.84	5.7	Animalia	Arthropoda	Insecta	Diptera	Anthomyiidae	Botanophila	Botanophila profuga	AGATATCCTCCTCCTCCTGCTGGATCAAAAATGAAGTATTTAAATATCGATCTGTTAGTAATATAGTAATAGCTCCTGCTAAAACTGGTAAAGATAATAAAAGTAATAAAGCTGTAATTACTACAGATCATACAAATAATGGTATTCGATCAAAAGTAATTCCTGTTGATCGTATATTAATTACAGTTGTAATAAAATTTACGGCTCCTAAAATTGAAGAAATTCCGGCTAAATGTAAAGAAAAAATAGCTAAATCAACAGAAGCTCCGCCATGAGCAATATTAGAAGATAAAGGAGGATAAACAGTTCATCCTGTACCAGCTCCGTTTTCTACTATACTGCTTACTAATAATAAAGTTAATGCAGGAGGTAAAAGTCAAAATCTTATATTATTTATTC…
Run 5, Sample 108	LCO1490 + HCO2198	CTmax	41.23	5.4	Animalia	Arthropoda	Insecta	Diptera	Anthomyiidae	Botanophila	Botanophila profuga	GAATGAAGGTATTTAAATTTCGATCTGTTAGAAATATAGTAATAGCTCCGGCTAAAACTGGTAAAGATAATAAAAGTAATAAGGCTGTAATTACTACGGATCATACAAATAATGGTATTCGATCAAAAGTAATTCCTGTTGATCGTATATTAATTACAGTTGTAATAAAATTTACGGCTCCTAAAATTGAAGAAATTCCGGCTAAATGTAAAGAAAAAATAGCTAAATCAACAGAACCTCCGCCATGAGCAATATTAGAAGATAAAGGAGGATAAACAGTTCATCCTGTCCCACCTCCGTTTTCTACTATACTGCTTACTAATAATAAAGTTAATGGAGGAGGTAAAAGTCAAAATCTTATATTATTTATTCGAGGAAAAGCTATATCAGGAGCTCCTA…
Run 5, Sample 109	BR2 + BF3	CTmax	41.23	5.4	Animalia	Arthropoda	Insecta	Diptera	Anthomyiidae	Botanophila	Botanophila profuga	AATAGCTCCTGCTAAAACTGGTAAAGATAATAAAAGTAATAAAGCTGTAATTACTACAGATCATACAAATAATGGTATTCGATCAAAAGTAATTCCTGTTGATCGTATATTAATTACAGTTGTAATAAAATTTACGGCTCCTAAAATTGAAGAAATTCCGGCTAAATGTAAAGAAAAAATAGCTAAATCAACAGAAGCTCCGCCATGAGCAATATTAGAAGATAAAGGAGGATAAACAGTTCATCCTGTACCAGCTCCGTTTTCTACTATACTGCTTACTAATAATAAAGTTAATGCAGGAGGTAAAAGTCAAAATCTTATATTATTTATTCGGGGAAAGGCCATGTCGGG
Run 5, Sample 117	BR2 + BF3	CTmax	38.94	5.2	Animalia	Arthropoda	Insecta	Diptera	Anthomyiidae	Botanophila	Botanophila profuga	ATAGCTAAATCAACAGAAGCTCCGCCATGAGCAATATTATAAGATAAAGGAGGATAAACAGTTCATCCTGTACCAGCTCCGTTTTCTACTATACTGCTTACTAATAATAAAGTCAATGCGGGAGGTAAAAGTCAAAATCTTATATTATTTATTCGGGGAAAAGCTATGTCAGGGCAATATCACCACCAACAGAAAAGC
Run 5, Sample 14	BR2 + BF3	CTmax	40.83	5.3	Animalia	Arthropoda	Insecta	Diptera	Anthomyiidae	Botanophila	Botanophila profuga	TGGGTAATAAAATTGGGATCTCCTCCTCCTGCTGGGATCAAAAAATGAAGTATTTAAATTTCGATCTGTTAGTAATATAGTAATAGCTCCTGCTAAAACTGGTAAAGATAATAAAAGTAATAAAGCTGTAATTACTACAGATCATACAAATAATGGTATTCGATCAAAAGTAATTCCTGTTGATCGTATATTAATTACAGTTGTAATAAAATTTACGGCTCCTAAAATTGAAGAAATTCCGGCTAAATGTAAAGAAAAAATAGCTAAATCAACAGAAGCTCCGCCATGAGCAATATTAGAAGATAAAGGAGGATAAACAGTTCATCCTGTACCAGCTCCGTTTTCTACTATACTGCTTACTAATAATAAAGTTAATGCAGGAGGTAAAAGTCAAAATCT…
Run 5, Sample 33	BR2 + BF3	CTmax	41.06	5.5	Animalia	Arthropoda	Insecta	Diptera	Anthomyiidae	Botanophila	Botanophila profuga	TTGGTAACTCCTCCTCCTGCTGGATCAAAAAATGAAGTATTTAAATTTCGATCTGTTAGTAATATAGTAATAGCTCCTGCTAAAACTGGTAAAGATAATAAAAGTAATAAAGCTGTAATTACTACAGATCATACAAATAATGGTATTCGATCAAAAGTAATTCCTGTTGATCGTATATTAATTACAGTTGTAATAAAATTTACGGCTCCTAAAATTGAAGAAATTCCGGCTAAATGTAAAGAAAAAATAGCTAAATCAACAGAAGCTCCGCCATGAGCAATATTAGAAGATAAAGGAGGATAAACAGTTCATCCTGTACCAGCTCCGTTTTCTACTATACTGCTTACTAATAATAAAGTTAATGCAGGAGGTAAAAGTCAAAATCTTATATTATTTATT…
Run 5, Sample 37	BR2 + BF3	CTmax	37.16	5.2	Animalia	Arthropoda	Insecta	Diptera	Anthomyiidae	Botanophila	Botanophila profuga	TCAGATATCTCCTCCTCCTGCTGGGATCAAAAAATGAAGTATATAAATTCCGATCTGTTAGTAATATAGTAATAGCTCCTGCTAAAACTGGTAAAGATAATAAAAGTAATAAAGCTGTAATTACTACAGATCATACAAATAATGGTATTCGATCAAAAGTAATTCCTGTTGATCGTATATTAATTACAGTTGTAATAAAATTTACGGCTCCTAAAATTGAAGAAATTCCGGCTAAATGTAAAGAAAAAATAGCTAAATCAACAGAAGCTCCGCCATGAGCAATATTAGAAGATAAAGGAGGATAAACAGTTCATCCTGTACCAGCTCCGTTTTCTACTATACTGCTTACTAATAATAAAGTTAATGCAGGAGGTAAAAGTCAAAATCTTATATTATTTA…
Run 5, Sample 52	LCO1490 + HCO2198	CTmax	41.29	5.5	Animalia	Arthropoda	Insecta	Diptera	Anthomyiidae	Botanophila	Botanophila profuga	TGGGTTAAAATTGGGATCTCCTCCTCCTGCTGGATCAAAAAATGAAGTATTTAAATTTCGATCTGTTAGTAATATAGTAATAGCTCCGGCTAAAACTGGTAAAGATAATAAAAGTAATAAAGCTGTAATTACTACAGATCATACAAATAATGGTATTCGATCAAAAGTAATTCCTGTTGATCGTATATTAATTACAGTTGTAATAAAATTTACGGCTCCTAAAATTGAAGAAATTCCGGCTAAATGTAAAGAAAAAATAGCTAAATCAACAGAAGCTCCGCCATGAGCAATATTAGAAGATAAAGGAGGATAAACAGTTCATCCTGTACCAGCTCCGTTTTCTACTATACTGCTTACTAATAATAAAGTTAATGCGGGAGGTAAAAGTCAAAATCTTAT…
Run 6, Sample 104	LCO1490 + HCO2198	CTmax	41.77	5	Animalia	Arthropoda	Insecta	Diptera	Anthomyiidae	Botanophila	Botanophila profuga	AGGTGGGTAAAATTGGGATCTCCTCCTCCTGCTGGATCAAAAATGAAGTATTTAAATTTCGATCTGTTAGTAATATAGTAATAGCTCCTGCTAAAACTGGTAAAGATAATAAAAGTAATAAAGCTGTAATTACTACAGATCATACAAATAATGGTATTCGATCAAAAGTAATTCCTGTTGATCGTATATTAATTACAGTTGTAATAAAATTTACGGCTCCTAAAATTGAAGAAATTCCGGCTAAATGTAAAGAAAAAATAGCTAAATCAACAGAAGCTCCGCCATGAGCAATATTAGAAGATAAAGGAGGATAAACAGTTCATCCTGTACCAGCTCCGTTTTCTACTATACTGCTTACTAATAATAAAGTTAATGCAGGAGGTAAAAGTCAAAATCTTA…
Run 1, Sample 10	BR2 + BF3	CTmax	41.53	4.9	Animalia	Arthropoda	Insecta	Diptera	Anthomyiidae	Botanophila	Botanophila sp.	GGGTACTTCCTCCCTCCTGCAGGATCAAAAAATGAAGTATTTAAATTTCGATCTGTTAATAATATAGTGATAGCTCCGGCTAAAACTGGTAATGATAATAAAAGTAATAAAGCTGTGATTACTACTGATCAAACAAATAATGGCATTCGATCAAAAGTAATTCCTGTTGATCGTATATTAATTACAGTTGTAATAAAATTTACAGCTCCTAAAATGGATGAGATTCCTGCTAAATGTAAAGAAAAAATAGCTAAATCAACAGAAGCTCCACCATGAGCAATATTAGAAGATAAAGGAGGATAAACAGTTCATCCTGTTCCAGCTCCATTTTCTACTATACTACTTACTAACAATAAAGTTAGTGCAGGAGGTAAAAGTCAAAAACTTATATTATTTATT…
Run 2, Sample 38	LCO1490 + HCO2198	CTmin	-4.14	4.6	Animalia	Arthropoda	Insecta	Diptera	Anthomyiidae	Botanophila	Botanophila sp.	GTTGAAATAAATAGGGTCTCCTCCTCCTGCAGGATCAAAAAATGAAGTATTTAAATTTCGATCTGTTAATAATATAGTGATAGCTCCGGCTAAAACTGGTAATGATAATAAAAGTAATAAAGCTGTGATTACTACTGATCAAACAAATAATGGCATTCGATCAAAAGTAATTCCTGTTGATCGTATATTAATTACAGTTGTAATAAAATTTACAGCTCCTAAAATGGATGAGATTCCTGCTAAATGTAAAGAAAAAATAGCTAAATCAACAGAAGCTCCACCATGAGCAATATTAGAAGATAAAGGAGGATAAACAGTTCATCCTGTTCCAGCTCCATTTTCTACTATACTACTTACTAACAATAAAGTTAGTGCAGGAGGTAAAAGTCAAAAACTTAT…
Run 2, Sample 40	LCO1490 + HCO2198	CTmin	-4.5	4.1	Animalia	Arthropoda	Insecta	Diptera	Anthomyiidae	Botanophila	Botanophila sp.	TGTTGAATAAAATAGGGTCTCCTCCTCCTGCAGGATCAAAAAATGAAGTATTTAAATTTCGATCTGTTAATAATATAGTGATAGCTCCGGCTAAAACTGGTAATGATAATAAAAGTAATAAAGCTGTGATTACTACTGATCAAACAAATAATGGCATTCGATCAAAAGTAATTCCTGTTGATCGTATATTAATTACAGTTGTAATAAAATTTACAGCTCCTAAAATGGATGAGATTCCTGCTAAATGTAAAGAAAAAATAGCTAAATCAACAGAAGCTCCACCATGAGCAATATTAGAAGATAAAGGAGGATAAACAGTTCATCCTGTTCCAGCTCCATTTTCTACTATACTACTTACTAACAATAAAGTTAGTGCAGGAGGTAAAAGTCAAAAACTTA…
Run 4, Sample 47	LCO1490 + HCO2198	CTmin	-0.17	5	Animalia	Arthropoda	Insecta	Diptera	Anthomyiidae	Botanophila	Botanophila sp.	GGTTGAATTAAATAGGGTCTCCTCCTCCTGCAGGATCAAAAAATGAAGTATTTAAATTTCGATCTGTTAATAATATAGTGATAGCTCCGGCTAAAACTGGTAATGATAATAAAAGTAATAAAGCTGTGATTACTACTGATCAAACAAATAATGGCATTCGATCAAAAGTAATTCCTGTTGATCGTATATTAATTACAGTTGTAATAAAATTTACAGCTCCTAAAATGGATGAGATTCCTGCTAAATGTAAAGAAAAAATAGCTAAATCAACAGAAGCTCCACCATGAGCAATATTAGAAGATAAAGGAGGATAAACAGTTCATCCTGTTCCAGCTCCATTTTCTACTATACTACTTACTAACAATAAAGTTAGTGCAGGAGGTAAAAGTCAAAAACTTA…
Run 4, Sample 89	LCO1490 + HCO2198	CTmin	-2.52	5	Animalia	Arthropoda	Insecta	Diptera	Anthomyiidae	Botanophila	Botanophila sp.	GTTGAATTAAATAGGGGTCTCCTCCTCCTGCAGGATCAAAAAATGAAGTATTTAAATTTCGATCTGTTAATAATATAGTGATAGCTCCGGCTAAAACTGGTAATGATAATAAAAGTAATAAAGCTGTGATTACTACTGATCAAACAAATAATGGCATTCGATCAAAAGTAATTCCTGTTGATCGTATATTAATTACAGTTGTAATAAAATTTACAGCTCCTAAAATGGATGAGATTCCTGCTAAATGTAAAGAAAAAATAGCTAAATCAACAGAAGCTCCACCATGAGCAATATTAGAAGATAAAGGAGGATAAACAGTTCATCCTGTTCCAGCTCCATTTTCTACTATACTACTTACTAACAATAAAGTTAGTGCAGGAGGTAAAAGTCAAAAACTTA…
Run 5, Sample 47	BR2 + BF3	CTmax	40.68	5.5	Animalia	Arthropoda	Insecta	Diptera	Anthomyiidae	Botanophila	Botanophila sp.	ATTTCGATCTGTTAATAATATAGTAATAGCTCCTGCTAAAACTGGTAAAGATAATAAAAGTAATAAAGCTGTAATTACTACAGATCATACAAATAATGGTATTCAATCAAAAGTAATTCCTGTTGATCGTATATTAATTACAGTTGTAATAAAATTTACGGCTCCTAAAATTGAAAAAATTCCGGCTAAATGTAAAGAAAAAATAGCTAAATCAACAGAAGCTCCGCCATGAGCAATATTAGAAAATAAAGGAGGATAAACAGTTCACCCTGTACCAGCTCCGTTTTCTACTATACTGCTTACTAATAATAAAGTTAATGCAGGAGGTAAAAGTCAAAATCTTATATTATTTATTCGGGGAAAGGCTAT
Run 5, Sample 96	LCO1490 + HCO2198	CTmax	40.52	5	Animalia	Arthropoda	Insecta	Diptera	Anthomyiidae	Botanophila	Botanophila sp.	AAGTTGATAAAATAGGGGTCTCCTCCTCCTGCAGGATCAAAAAATGAAGTATTTAAATTTCGATCTGTTAATAATATAGTGATAGCTCCGGCTAAAACTGGTAATGATAATAAAAGTAATAAAGCTGTGATTACTACTGATCAAACAAATAATGGCATTCGATCAAAAGTAATTCCTGTTGATCGTATATTAATTACAGTTGTAATAAAATTTACAGCTCCTAAAATGGATGAGATTCCTGCTAAATGTAAAGAAAAAATAGCTAAATCAACAGAAGCTCCACCATGAGCAATATTAGAAGATAAAGGAGGATAAACAGTTCATCCTGTTCCAGCTCCATTTTCTACTATACTACTTACTAACAATAAAGTTAGTGCAGGAGGTAAAAGTCAAAAACTT…
Run 6, Sample 8	LCO1490 + HCO2198	CTmax	42.13	4.8	Animalia	Arthropoda	Insecta	Diptera	Anthomyiidae	Botanophila	Botanophila sp.	AAAAGGTGAATAAATAGGGTCTCCTCCTCCTGCAGGATCAAAAAATGAAGTATTTAAATTTCGATCTGTTAATAATATAGTGATAGCTCCGGCTAAAACTGGTAATGATAATAAAAGTAATAAAGCTGTGATTACTACTGATCAAACAAATAATGGCATTCGATCAAAAGTAATTCCTGTTGATCGTATATTAATTACAGTTGTAATAAAATTTACAGCTCCTAAAATGGATGAGATTCCTGCTAAATGTAAAGAAAAAATAGCTAAATCAACAGAAGCTCCACCATGAGCAATATTAGAAGATAAAGGAGGATAAACAGTTCATCCTGTTCCAGCTCCATTTTCTACTATACTACTTACTAACAATAAAGTTAGTGCAGGAGGTAAAAGTCAAAAACT…
Run 4, Sample 97	LCO1490 + HCO2198	CTmin	3.74		Animalia	Arthropoda	Insecta	Diptera	Anthomyiidae	Botanophila	Botanophila sp.	AAAAATGTTGATATAAATAGGGTCTCCTCCTCCTGCAGGATCAAAAAATGAAGTATTTAAATTTCGATCTGTTAATAATATAGTGATAGCTCCGGCTAAAACTGGTAATGATAATAAAAGTAATAAAGCTGTGATTACTACTGATCAAACAAATAATGGCATTCGATCAAAAGTAATTCCTGTTGATCGTATATTAATTACAGTTGTAATAAAATTTACAGCTCCTAAAATGGATGAGATTCCTGCTAAATGTAAAGAAAAAATAGCTAAATCAACAGAAGCTCCACCATGAGCAATATTAGAAGATAAAGGAGGATAAACAGTTCATCCTGTTCCAGCTCCATTTTCTACTATACTACTTACTAACAATAAAGTTAGTGCAGGAGGTAAAAGTCAAAA…
Run 4, Sample 80	LCO1490 + HCO2198	CTmin	-3.63	1.2	Animalia	Arthropoda	Insecta	Diptera	Sciaridea	Bradysia	Bradysia sp.	CTACGCGGCGGGGTCAAAAATGAGGTATTCAAGTTTCGGTCTGTTAATAATATTGTAATTGCCCCGGCTAGAACTGGTAAAGATAGCAATAGTAATACGGCAGTAATTAAAACGAATCACACAAATAAGGGTATTTTATCAAATGATATTCCGGGGGCCCGTATATTAATAATAGTAAAAATGAAATTTACGGCCCCTAAAATTGATGAAATACCGGCTAGATGGAGGGAAAAGATTGATAAATCGACTGAAGCCCCTGAATGGGACAAAGTTGAAGATAGTGGGGGGTAAACTGTTCACCCTGTCCCTGTTCCTCTTTCTACTAATCTACTAGTTAATAATAATGTGAGTGAGGGGGGCAGCAGTCAAAATCTTATGTTATTTAAACGGGGAAATGCT…	97.91 %
Run 6, Sample 109	LCO1490 + HCO2198	CTmax	22.27	14	Animalia	Arthropoda	Insecta	Diptera	Carabidae	Calliphora	Calliphora uralensis	GTGGGGTAAAATTGGGGTCTCCTCCTCCTGCTGGATCAAAGAATGAAGTATTAAGGTTTCGATCTGTTAATAATATAGTAATAGCTCCTGCTAATACTGGTAAAGATAATAAAAGTAATAAAGCTGTAATTACTACTGATCAAACAAATAATGGTATTCGGTCGAAGGTAATCCCTGTTGATCGTATATTAATAACTGTAGTAATAAAATTTACAGCTCCTAAAATTGAAGAAATTCCTGCTAAATGCAAAGAAAAAATAGCTAAATCAACAGAAGCTCCTCCATGAGCAATATTAGAAGATAAAGGTGGGTAAACAGTTCATCCTGTTCCAGCTCCGTTTTCTACTATACTACTTACTAATAGTAAAGTTAATGCAGGAGGTAAAAGTCAGAAACTTA…
Run 6, Sample 122	LCO1490 + HCO2198	CTmax	29.96	13	Animalia	Arthropoda	Insecta	Diptera	Carabidae	Calliphora	Calliphora uralensis	TGCTGGGATCAAAGAATGAAGTATTAAGGTTTCGATCTGTTAATAATATAGTAATAGCTCCTGCTAATACTGGTAAAGATAATAAAAGTAATAAAGCTGTAATTACTACTGATCAAACAAATAATGGTATTCGGTCGAAGGTAATCCCTGTTGATCGTATATTAATAACTGTAGTAATAAAATTTACAGCTCCTAAAATTGAAGAAATTCCTGCTAAATGCAAAGAAAAAATAGCTAAATCAACAGAAGCTCCTCCATGAGCAATATTAGAAGATAAAGGTGGATAAACAGTTCATCCTGTTCCAGCTCCGTTTTCTACTATACTACTTACTAATAGTAAAGTTAATGCAGGAGGTAAAAGTCAGAAACTTATATTATTTATTCGAGGGAATGCTATAT…
Run 2, Sample 124	LCO1490 + HCO2198	CTmin	13.5	4	Animalia	Arthropoda	Insecta	Diptera	Muscidae		Muscidae sp.	AGGTGGAATAAATTGGGGTCTCCTCCTCCAGCTGGGTCAAAGAAAGATGTGTTTAAATTTCGATCTGTTAATAATATTGTAATAGCTCCAGCCAGTACTGGTAAGGATAATAAAAGTAATAAAGCTGTAATTGTTACTGATCAAACAAATAAAGGTATTCGATCAAAGGTAATTCCTGTTGATCGTATATTAATTACAGTAGTAATAAAATTAACAGCTCCTAAAATTGAAGAAATTCCTGCTAAATGTAAAGAAAAAATAGCTAAATCTACAGAAGCTCCTCCATGAGCAATATTAGATGATAGAGGAGGGTAAACTGTTCAACCTGTCCCAGCTCCATTTTCTACTATACTGCTTGCTAGTAAAAGGGTTAAAGCTGGAGGTAGTAATCAAAAACTT…
Run 3, Sample 13	LCO1490 + HCO2198	CTmin	-5.34	4.1	Animalia	Arthropoda	Insecta	Diptera	Muscidae		Muscidae sp.	AGTTGAATTAAATTGGGGTCTCCTCCTCCAGCTGGGTCAAAGAAAGATGTGTTTAAATTTCGATCTGTTAATAATATTGTAATAGCTCCAGCCAGTACTGGTAAGGATAATAAAAGTAATAAAGCTGTAATTGCTACTGATCAAACAAATAAAGGTATTCGATCAAAGGTAATTCCTGTTGATCGTATATTAATTACAGTAGTAATAAAATTAACAGCTCCTAAAATTGAAGAAATTCCTGCTAAATGTAAAGAAAAAATAGCTAAATCTACAGAAGCTCCTCCATGAGCAATATTAGATGATAGAGGAGGGTAAACTGTTCAACCTGTCCCAGCTCCATTTTCTACTATACTGCTTGCTAGTAAAAGGGTTAAAGCTGGAGGTAGTAATCAAAAACTT…
Run 3, Sample 20	LCO1490 + HCO2198	CTmin	-4.71	3.7	Animalia	Arthropoda	Insecta	Diptera	Muscidae		Muscidae sp.	AAAAGCTGTAATTGCTACTGATCAAACAAATAAAGGTATTCGATCAAAGGTAATTCCTGTTGATCGTATATTAATTACAGTAGTAATAAAATTAACAGCTCCTAAAATTGAAGAAATTCCTGCTAAATGTAAAGAAAAAATAGCTAAATCTACAGAAGCTCCTCCATGAGCAATATTAAAAGATAGAGGAG
Run 3, Sample 38	LCO1490 + HCO2198	CTmin	9.94	3.5	Animalia	Arthropoda	Insecta	Diptera	Muscidae		Muscidae sp.	ATGAACATGTTTAAATTTCGATCTGTTAATAATATTGTAATAGCTCCAGCCAGTACTGGTAAGGATAATAAAAGTAATAAAGCTGTAATTGCTACTGATCAAACAAATAAAGGTATTCGATCAAAGGTAATTCCTGTTGATCGTATATTAATTACAGTAGTAATAAAATTAACAGCTCCTAAAATTGAAGAAATTCCTGCTAAATGTAAAGAAAAAATAGCTAAATCTACAGAAGCTCCTCCATGAGCAATATTAGATGATAGAGGAGGGTAAACTGTTCAACCTGTCCCAGCTCCATTTTCTACTATACTGCTTGCTAGTAAAAGGGTTAAAGCTGGAGGTAGTAATCAAAAACTTATATTATTTATTCGAGGGAAGGCTATATCTGGGGCTCCTAAT…
Run 3, Sample 75	LCO1490 + HCO2198	CTmin	-5.44	3.8	Animalia	Arthropoda	Insecta	Diptera	Muscidae		Muscidae sp.	GAGCATAGATGTGTTTAAATTTCGATCTGTTAATAATATTGTAATAGCTCCAGCCAGTACTGGTAAGGATAATAAAAGTAATAAAGCTGTAATTGCTACTGCATCAAACAAATAAAGGTATTCGATCAAAGGTAATTCCTGTCGATCGTATATTAATTACAGTAGTAATAAAATTAACAGCTCCTAAAATTGAAGAAATTCCTGCTAAATGTAAAGAAAAAATAGCTAAATCTACACAACCTCCTCCATGAGCAATATTAGATGAGAGAGGAGGGTAAACTGTTCACCCTGTCCCAGCTCCATTTTCTACTATACTGCTTGCTAGTAAAAGGGTTAAAGCTGGAGGTAGTAATCAAAAACTTATATTATTTATTCGAGGGAAGGCTATATCTGGGGCTC…
Run 6, Sample 76	LCO1490 + HCO2198	CTmax	42.57	4.1	Animalia	Arthropoda	Insecta	Diptera	Muscidae		Muscidae sp.	GTGAAATTAAATTGGGGTCTCCTCCTCCAGCTGGGTCAAAGAAAGATGTATTTAAATTTCGATCTGTTAATAATATTGTAATAGCTCCAGCCAGTACTGGTAAGGATAATAAAAGTAATAAAGCTGTAATTGCTACTGATCAAACAAATAAAGGTATTCGATCAAAGGTAATTCCTGTTGATCGTATATTAATTACAGTAGTAATAAAATTAACAGCTCCTAAAATTGAAGAAATTCCTGCTAAATGTAAAGAAAAAATAGCTAAATCTACAGAAGCTCCTCCATGAGCAATATTAGATGATAGAGGAGGGTAAACTGTTCAACCTGTCCCAGCTCCATTTTCTACTATACTGCTTGCTAGTAAAAGGGTTAAAGCTGGAGGTAGTAATCAAAAACTTA…
Run 1, Sample 53	LCO1490 + HCO2198	CTmax	43.14	4.4	Animalia	Arthropoda	Insecta	Diptera	Anthomyiidae	Delia	Delia echinata	AAAGGGTGGAATAAATTGGGATCTCCTCCTCCTGCAGGGTCAAAAAATGATGTGTTTAGATTTCGATCAGTTAATAATATAGTAATAGCACCTGCTAAAACAGGTAAAGATAATAAAAGAAGTAAAGCTGTAATTACTACTGATCACACAAATAATGGTATACGATCAAAAGTGATTCCCTTTGATCGTATATTAATTACAGTTGTGATGAAATTTACGGCACCTAAAATTGATGAAATCCCAGCTAAATGTAGAGAAAAAATTGCTAAATCTACAGAAGCTCCACTATGAGCAATATTATTAGACAGAGGAGGGTAAACAGTTCATCCTGTACCAGCCCCGTTATCTACTATACTTCTTATAAGCAATAGAGTTAATGATGGAGGTAGAAGTCAAAAT…
Run 4, Sample 86	LCO1490 + HCO2198	CTmin		4	Animalia	Arthropoda	Insecta	Diptera	Anthomyiidae	Delia	Delia echinata	TGTTGATTAAAATTGGGATCTCCTCCTCCTGCAGGGTCAAAAAATGATGTGTTTAGATTTCGATCAGTTAATAATATAGTAATAGCACCTGCTAAAACAGGTAAAGATAATAAAAGAAGTAAAGCTGTAATTACTACTGATCACACAAATAATGGTATACGATCAAAAGTGATTCCCTTTGATCGTATATTAATTACAGTTGTGATGAAATTTACGGCACCTAAAATTGATGAAATCCCAGCTAAATGTAGAGAAAAAATTGCTAAATCTACAGAAGCTCCACTATGAGCAATATTATTAGACAGAGGAGGGTAAACAGTTCATCCTGTACCAGCCCCGTTATCTACTATACTTCTTATAAGCAATAGAGTTAATGATGGAGGTAGAAGTCAAAATCTT…
Run 4, Sample 91	LCO1490 + HCO2198	CTmin	-6.01	4.5	Animalia	Arthropoda	Insecta	Diptera	Anthomyiidae	Delia	Delia echinata	TAGATTTAGATCAGTTAATAATATAGTAATAGCACCTGCTAAAACAGGTAAAGATAATAAAAGAAGTAAAGCTGTAATTACTACTGATCACACAAATAATGGTATACGATCAAAAGTGATTCCCTTTGATCGTATATTAATTACAGTTGTGATGAAATTTACGGCACCTAAAATTGATGAAATCCCAGCTAAATGTAGAGAAAAAATTGCTAAATCTACAGAAGCTCCACTATGAGCAATATTATTAGACAGAGGAGGGTAAACAGTTCATCCTGTACCAGCCCCGTTATCTACTATACTTCTTATAAGCAATAGAGTTAATGATGGAGGTAGAAGTCAAAATCTTATATTATTCATTCGAGGAAAAGCTATATCTGGAGCACCTAGTATAAGGGGAAC…
Run 1, Sample 58	LCO1490 + HCO2198	CTmax	42.55	5.2	Animalia	Arthropoda	Insecta	Diptera	Anthomyiidae	Delia	Delia fabricii	AGTTGATTAAAATTGGGATCTCCTCCTCCAGCGGGATCAAAAAATGAAGTATTTAAATTTCGATCTGTTAATAATATAGTAATAGCTCCAGCTAAAACTGGTAAAGATAATAAAAGAAGTAAAGCTGTAATTACTACTGATCATACAAATAATGGTATTCGATCAAAAGTAATTCCTGTTGATCGTATATTAATTACAGTTGTAATAAAATTTACGGCTCCTAGAATTGATGAAATTCCTGCTAAATGCAGAGAAAAAATTGCTAAATCTACAGAAGCTCCACCATGAGCAATATTAGAAGATAAAGGTGGGTAAACAGTTCATCCTGTCCCAGCTCCATTTTCTACTATACTTCTTACTAATAGTAAAGTTAATGCAGGGGGTAATAATCAAAAGCTT…
Run 1, Sample 72	LCO1490 + HCO2198	CTmax	43.03	5.8	Animalia	Arthropoda	Insecta	Diptera	Anthomyiidae	Delia	Delia fabricii	GTTGAATTAAATTGGGATCTCCTCCTCCAGCGGGATCAAAAATGAAGTATTTAAATTTCGATCTGTTAATAATATAGTAATAGCTCCAGCTAAAACTGGTAAAGATAATAAAAGAAGTAAAGCTGTAATTACTACTGATCATACAAATAATGGTATTCGATCAAAAGTAATTCCTGTTGATCGTATATTAATTACAGTTGTAATAAAATTTACGGCTCCTAGAATTGATGAAATTCCTGCTAAATGCAGAGAAAAAATTGCTAAATCTACAGAAGCTCCACCATGAGCAATATTAGAAGATAAAGGTGGGTAAACAGTTCATCCTGTCCCAGCTCCATTTTCTACTATACTTCTTACTAATAGTAAAGTTAATGCAGGGGGTAATAATCAAAAGCTTAT…
Run 1, Sample 75	LCO1490 + HCO2198	CTmax	42.92	6.2	Animalia	Arthropoda	Insecta	Diptera	Anthomyiidae	Delia	Delia fabricii	TGGTAAAAAATTGGGATCTCCTCCTCCAGCGGGATCAAAAAATGAAGTATTTAAATTTCGATCTGTTAATAATATAGTAATAGCTCCAGCTAAAACTGGTAAAGATAATAAAAGAAGTAAAGCTGTAATTACTACTGATCATACAAATAATGGTATTCGATCAAAAGTAATTCCTGTTGATCGTATATTAATTACAGTTGTAATAAAATTTACGGCTCCTAGAATTGATGAAATTCCTGCTAAATGCAGAGAAAAAATTGCTAAATCTACAGAAGCTCCACCATGAGCAATATTAGAAGATAAAGGTGGGTAAACAGTTCATCCTGTCCCAGCTCCATTTTCTACTATACTTCTTACTAATAGTAAAGTTAATGCAGGGGGTAATAATCAAAAGCTTAT…
Run 1, Sample 85	LCO1490 + HCO2198	CTmax	43.35	6.5	Animalia	Arthropoda	Insecta	Diptera	Anthomyiidae	Delia	Delia fabricii	AAAAGGTGGAATAAAATTGGGATCTCCTCCTCCAGCGGGATCAAAAAATGAAGTATTTAAATTTCGATCTGTTAATAATATAGTAATAGCTCCAGCTAAAACTGGTAAAGATAATAAAAGAAGTAAAGCTGTAATTACTACTGATCATACAAATAATGGTATTCGATCAAAAGTAATTCCTGTTGATCGTATATTAATTACAGTTGTAATAAAATTTACGGCTCCTAGAATTGATGAAATTCCTGCTAAATGCAGAGAAAAAATTGCTAAATCTACAGAAGCTCCACCATGAGCAATATTAGAAGATAAAGGTGGGTAAACAGTTCATCCTGTCCCAGCTCCATTTTCTACTATACTTCTTACTAATAGTAAAGTTAATGCAGGGGGTAATAATCAAAA…
Run 2, Sample 102	LCO1490 + HCO2198	CTmin	-1.93	5.6	Animalia	Arthropoda	Insecta	Diptera	Anthomyiidae	Delia	Delia fabricii	GAGCCTAATAATATAGTAATAGCTCCAGCTAAAACTGGTAAAGATAATAAAAGAAGTAAAGCTGTAATTACTACTGATCATACAAATAATGGTATTCGATCAAAAGTAATTCCTGTTGATCGTATATTAATTACAGTTGTAATAAAATTTACGGCTCCTAGAATTGATGAAATTCCTGCTAAATGCAGAGAAAAAATTGCTAAATCTACAGAAGCTCCACCATGAGCAATATTAGAAGATAAAGGTGGGTAAACAGTTCATCCTGTCCCAGCTCCATTTTCTACTATACTTCTTACTAATAGTAAAGTTAATGCAGGGGGTAATAATCAAAAGCTTATATTATTTATTCGGGGGAAGGCTATATCTGGGGCACCTAATATAAGGGGAACTAATCAGTTA…
Run 2, Sample 103	LCO1490 + HCO2198	CTmin	6.99	5	Animalia	Arthropoda	Insecta	Diptera	Anthomyiidae	Delia	Delia fabricii	GTGGAATTAAATTGGGATCTCCTCCTCCAGCGGGATCAAAAAATGAAGTATTTAAATTTCGATCTGTTAATAATATAGTAATAGCTCCAGCTAAAACTGGTAAAGATAATAAAAGAAGTAAAGCTGTAATTACTACTGATCATACAAATAATGGTATTCGATCAAAAGTAATTCCTGTTGATCGTATATTAATTACAGTTGTAATAAAATTTACGGCTCCTAGAATTGATGAAATTCCTGCTAAATGCAGAGAAAAAATTGCTAAATCTACAGAAGCTCCACCATGAGCAATATTAGAAGATAAAGGTGGGTAAACAGTTCATCCTGTCCCAGCTCCATTTTCTACTATACTTCTTACTAATAGTAAAGTTAATGCAGGGGGTAATAATCAAAAGCTTA…
Run 2, Sample 126	LCO1490 + HCO2198	CTmin	15.35	5	Animalia	Arthropoda	Insecta	Diptera	Anthomyiidae	Delia	Delia fabricii	TAAAAATGTTGAAATAAATTGGGATCTCCTCCTCCAGCGGGATCAAAAAATGAAGTATTTAAATTTCGATCTGTTAATAATATAGTAATAGCTCCAGCTAAAACTGGTAAAGATAATAAAAGAAGTAAAGCTGTAATTACTACTGATCATACAAATAATGGTATTCGATCAAAAGTAATTCCTGTTGATCGTATATTAATTACAGTTGTAATAAAATTTACGGCTCCTAGAATTGATGAAATTCCTGCTAAATGCAGAGAAAAAATTGCTAAATCTACAGAAGCTCCACCATGAGCAATATTAGAAGATAAAGGTGGGTAAACAGTTCATCCTGTCCCAGCTCCATTTTCTACTATACTTCTTACTAATAGTAAAGTTAATGCAGGGGGTAATAATCAA…
Run 2, Sample 127	LCO1490 + HCO2198	CTmin	2.35	6.5	Animalia	Arthropoda	Insecta	Diptera	Anthomyiidae	Delia	Delia fabricii	GGTGGAATAAAATTGGGATCTCCTCCTCCAGCGGGATCAAAAAATGAAGTATTTAAATTTCGATCTGTTAATAATATAGTAATAGCTCCAGCTAAAACTGGTAAAGATAATAAAAGAAGTAAAGCTGTAATTACTACTGATCATACAAATAATGGTATTCGATCAAAAGTAATTCCTGTTGATCGTATATTAATTACAGTTGTAATAAAATTTACGGCTCCTAGAATTGATGAAATTCCTGCTAAATGCAGAGAAAAAATTGCTAAATCTACAGAAGCTCCACCATGAGCAATATTAGAAGATAAAGGTGGGTAAACAGTTCATCCTGTCCCAGCTCCATTTTCTACTATACTTCTTACTAATAGTAAAGTTAATGCAGGGGGTAATAATCAAAAGCTT…
Run 2, Sample 14	LCO1490 + HCO2198	CTmin	-2.61	6	Animalia	Arthropoda	Insecta	Diptera	Anthomyiidae	Delia	Delia fabricii	AAAAATGTTGATTAAATTGGGATCTCCTCCTCCAGCGGGATCAAAAATGAAGTATTTAAATTTCGATCTGTTAATAATATAGTAATAGCTCCAGCTAAAACTGGTAAAGATAATAAAAGAAGTAAAGCTGTAATTACTACTGATCATACAAATAATGGTATTCGATCAAAAGTAATTCCTGTTGATCGTATATTAATTACAGTTGTAATAAAATTTACGGCTCCTAAAATTGATGAAATTCCTGCTAAATGCAGAGAAAAAATTGCTAAATCTACAGAACCTCCACCATGAGCAATATTAGAAGATAAAGGTGGGTAAACAGTTCATCCTGTCCCAGCTCCATTTTCTACTATACTTCTTACTAATAGTAAAGTTAATGCAGGGGGTAATAATCAAAAG…
Run 2, Sample 29	LCO1490 + HCO2198	CTmin	11.44	7.5	Animalia	Arthropoda	Insecta	Diptera	Anthomyiidae	Delia	Delia fabricii	AAAAATGTTGAATTAAATTGGGATCTCCTCCTCCAGCGGGATCAAAAAATGAAGTATTTAAATTTCGATCTGTTAATAATATAGTAATAGCTCCAGCTAAAACTGGTAAAGATAATAAAAGAAGTAAAGCTGTAATTACTACTGATCATACAAATAATGGTATTCGATCAAAAGTAATTCCTGTTGATCGTATATTAATTACAGTTGTAATAAAATTTACGGCTCCTAGAATTGATGAAATTCCTGCTAAATGCAGAGAAAAAATTGCTAAATCTACAGAAGCTCCACCATGAGCAATATTAGAAGATAAAGGTGGGTAAACAGTTCATCCTGTCCCAGCTCCATTTTCTACTATACTTCTTACTAATAGTAAAGTTAATGCAGGGGGTAATAATCAAA…
Run 2, Sample 31	LCO1490 + HCO2198	CTmin	-3.52	5.5	Animalia	Arthropoda	Insecta	Diptera	Anthomyiidae	Delia	Delia fabricii	GTTGAAATTAAATTGGGATCTCCTCCTCCAGCGGGATCAAAAATGAAGTATTTAAATTTCGATCTGTTAATAATATAGTAATAGCTCCAGCTAAAACTGGTAAAGATAATAAAAGAAGTAAAGCTGTAATTACTACTGATCACACAAATAATGGTATTCGATCAAAAGTAATTCCTGTTGATCGTATATTAATTACAGTTGTAATAAAATTTACGGCTCCTAGAATTGATGAAATTCCTGCTAAATGCAGAGAAAAAATTGCTAAATCTACAGAAGCTCCACCATGAGCAATATTAGAAGATAAAGGTGGGTAAACAGTTCATCCTGTCCCAGCCCCATTTTCTACTATACTTCTTACTAATAGTAAAGTTAATGCAGGGGGTAATAATCAAAAGCTTA…
Run 2, Sample 36	LCO1490 + HCO2198	CTmin	-4.14	5	Animalia	Arthropoda	Insecta	Diptera	Anthomyiidae	Delia	Delia fabricii	AAAATGTTGATTAAATTGGGATCTCCTCCTCCAGCGGGATCAAAAAATGAAGTATTTAAATTTCGATCTGTTAATAATATAGTAATAGCTCCAGCTAAAACTGGTAAAGATAATAAAAGAAGTAAAGCTGTAATTACTACTGATCATACAAATAATGGTATTCGATCAAAAGTAATTCCTGTTGATCGTATATTAATTACAGTTGTAATAAAATTTACGGCTCCTAGAATTGATGAAATTCCTGCTAAATGCAGAGAAAAAATTGCTAAATCTACAGAAGCTCCACCATGAGCAATATTAGAAGATAAAGGTGGGTAAACAGTTCATCCTGTCCCAGCTCCATTTTCTACTATACTTCTTACTAATAGTAAAGTTAATGCAGGGGGTAATAATCAAAAG…
Run 3, Sample 1	LCO1490 + HCO2198	CTmin	-3.1	5	Animalia	Arthropoda	Insecta	Diptera	Anthomyiidae	Delia	Delia fabricii	GGAATACTCCGTCCTACAGCGGGATCAAAAAATGAAGTATTTAAATTTCGATCTGTTAATAATATAGTAATAGCTCCAGCTAAAACTGGTAAAGATAATAAAAGAAGTAAAGCTGTAATTACTACTGATCATACAAATAATGGTATTCGATCAAAAGTAATTCCTGTTGATCGTATATTAATTACAGTTGTAATAAAATTTACGGCTCCTAGAATTGATGAAATTCCTGCTAAATGCAGAGAAAAAATTGCTAAATCTACAGAAGCTCCACCATGAGCAATATTAGAAGATAAAGGTGGGTAAACAGTTCATCCTGTCCCAGCTCCATTTTCTACTATACTTCTTACTAATAGTAAAGTTAATGCAGGGGGTAACAATCAAAAGCTTATATTATTTATT…
Run 3, Sample 10	LCO1490 + HCO2198	CTmin	-2.27	5	Animalia	Arthropoda	Insecta	Diptera	Anthomyiidae	Delia	Delia fabricii	TGTTGAATTAAATTGGGATCTCCTCCTCCAGCGGGATCAAAAATGAAGTATTTAAATTTCGATCTGTTAATAATATAGTAATAGCTCCAGCTAAAACTGGTAAAGATAATAAAAGAAGTAAAGCTGTAATTACTACTGATCATACAAATAATGGTATTCGATCAAAAGTAATTCCTGTTGATCGTATATTAATTACAGTTGTAATAAAATTTACGGCTCCTAGAATTGATGAAATTCCTGCTAAATGCAGAGAAAAAATTGCTAAATCTACAGAAGCTCCACCATGAGCAATATTAGAAGATAAAGGTGGGTAAACAGTTCATCCTGTCCCAGCTCCATTTTCTACTATACTTCTTACTAATAGTAAAGTTAATGCAGGGGGTAATAATCAAAAGCTTA…
Run 3, Sample 11	LCO1490 + HCO2198	CTmin	-3.26	5	Animalia	Arthropoda	Insecta	Diptera	Anthomyiidae	Delia	Delia fabricii	AAAAATGTTGATTAAATTGGGATCTCCTCCTCCAGCGGGATCAAAAAATGAAGTATTTAAATTTCGATCTGTTAATAATATAGTAATAGCTCCAGCTAAAACTGGTAAAGATAATAAAAGAAGTAAAGCTGTAATTACTACTGATCATACAAATAATGGTATTCGATCAAAAGTAATTCCTGTTGATCGTATATTAATTACAGTTGTAATAAAATTTACGGCTCCTAGAATTGATGAAATTCCTGCTAAATGCAGAGAAAAAATTGCTAAATCTACAGAAGCTCCACCATGAGCAATATTAGAAGATAAAGGTGGGTAAACAGTTCATCCTGTCCCAGCTCCATTTTCTACTATACTTCTTACTAATAGTAAAGTTAATGCAGGGGGTAATAATCAAAA…
Run 3, Sample 12	LCO1490 + HCO2198	CTmin	1.06	6	Animalia	Arthropoda	Insecta	Diptera	Anthomyiidae	Delia	Delia fabricii	TTGAAATTAAATTGGGATCTCCTCCTCCAGCGGGATCAAAAAATGAAGTATTTAAATTTCGATCTGTTAATAATATAGTAATAGCTCCAGCTAAAACTGGTAAAGATAATAAAAGAAGTAAAGCTGTAATTACTACTGATCACACAAATAATGGTATTCGATCAAAAGTAATTCCTGTTGATCGTATATTAATTACAGTTGTAATAAAATTTACGGCTCCTAGAATTGATGAAATTCCTGCTAAATGCAGAGAAAAAATTGCTAAATCTACAGAAGCTCCACCATGAGCAATATTAGAAGATAAAGGTGGGTAAACAGTTCATCCTGTCCCAGCCCCATTTTCTACTATACTTCTTACTAATAGTAAAGTTAATGCAGGGGGTAATAATCAAAAGCTTA…
Run 3, Sample 2	LCO1490 + HCO2198	CTmin	-0.87	7	Animalia	Arthropoda	Insecta	Diptera	Anthomyiidae	Delia	Delia fabricii	GTTGAAATTAAATTGGGATCTCCTCCTCCAGCGGGATCAAAAATGAAGTATTTAAATTTCGATCTGTTAATAATATAGTAATAGCTCCAGCTAAAACTGGTAAAGATAATAAAAGAAGTAAAGCTGTAATTACTACTGATCATACAAATAATGGTATTCGATCAAAAGTAATTCCTGTTGATCGTATATTAATTACAGTTGTAATAAAATTTACGGCTCCTAGAATTGATGAAATTCCTGCTAAATGCAGAGAAAAAATTGCTAAATCTACAGAAGCTCCACCATGAGCAATATTAGAAGATAAAGGTGGGTAAACAGTTCATCCTGTCCCAGCTCCATTTTCTACTATACTTCTTACTAATAGTAAAGTTAATGCAGGGGGTAATAATCAAAAGCTTA…
Run 3, Sample 22	LCO1490 + HCO2198	CTmin	-2.53	7	Animalia	Arthropoda	Insecta	Diptera	Anthomyiidae	Delia	Delia fabricii	AAATTTGGGATCCTCCTCCTCCAGCGGGATCAAAAAATGAAGTATTTAAATTTCGATCTGTTAATAATATAGTAATAGCTCCAGCTAAAACTGGTAAAGATAATAAAAGAAGTAAAGCTGTAATTACTACTGATCATACAAATAATGGTATTCGATCAAAAGTAATTCCTGTTGATCGTATATTAATTACAGTTGTAATAAAATTTACGGCTCCTAGAATTGATGAAATTCCTGCTAAATGCAGAGAAAAAATTGCTAAATCTACAGAAGCTCCACCATGAGCAATATTAGAAGATAAAGGTGGGTAAACAGTTCATCCTGTCCCAGCTCCATTTTCTACTATACTTCTTACTAATAGTAAAGTTAATGCAGGGGGTAATAATCAAAAGCTTATATTAT…
Run 3, Sample 23	LCO1490 + HCO2198	CTmin	-3.45	6	Animalia	Arthropoda	Insecta	Diptera	Anthomyiidae	Delia	Delia fabricii	TAAATTGGGATTCTCCTCCTCCAGCGGGATCAAAAAATGAAGTATTTAAATTTCGATCTGTTAATAATATAGTAATAGCTCCAGCTAAAACTGGTAAAGATAATAAAAGAAGTAAAGCTGTAATTACTACTGATCATACAAATAATGGTATTCGATCAAAAGTAATTCCTGTTGATCGTATATTAATTACAGTTGTAATAAAATTTACGGCTCCTAGAATTGATGAAATTCCTGCTAAATGCAGAGAAAAAATTGCTAAATCTACAGAAGCTCCACCATGAGCAATATTAGAAGATAAAGGTGGGTAAACAGTTCATCCTGTCCCAGCTCCATTTTCTACTATACTTCTTACTAATAGTAAAGTTAATGCAGGGGGTAATAATCAAAAGCTTATATTAT…
Run 3, Sample 28	LCO1490 + HCO2198	CTmin	-3.59	6.2	Animalia	Arthropoda	Insecta	Diptera	Anthomyiidae	Delia	Delia fabricii	GAGCGGCAATCAAAAAATGAAGTATTTAAATTTCGATCTGTTAATAATATAGTAATAGCTCCAGCTAAAACTGGTAAAGATAATAAAAGAAGTAAAGCTGTAATTACTACTGATCATACAAATAATGGTATTCGATCAAAAGTAATTCCTGTTGATCGTATATTAATTACAGTTGTAATAAAATTTACGGCTCCTAGAATTGATGAAATTCCTGCTAAATGCAGAGAAAAAATTGCTAAATCTACAGAAGCTCCACCATGAGCAATATTAGAAGATAAAGGTGGGTAAACAGTTCATCCTGTCCCAGCTCCATTTTCTACTATACTTCTTACTAATAGTAAAGTTAATGCAGGGGGTAATAATCAAAAGCTTATATTATTTATTCGGGGGAAGGCTATA…
Run 3, Sample 30	LCO1490 + HCO2198	CTmin	-3.68	6.9	Animalia	Arthropoda	Insecta	Diptera	Anthomyiidae	Delia	Delia fabricii	AGTTGAATTAAATTGGGATCTCCTCCTCCAGCGGGATCAAAAAATGAAGTATTTAAATTTCGATCTGTTAATAATATAGTAATAGCTCCAGCTAAAACTGGTAAAGATAATAAAAGAAGTAAAGCTGTAATTACTACTGATCATACAAATAATGGTATTCGATCAAAAGTAATTCCTGTTGATCGTATATTAATTACAGTTGTAATAAAATTTACGGCTCCTAGAATTGATGAAATTCCTGCTAAATGCAGAGAAAAAATTGCTAAATCTACAGAAGCTCCACCATGAGCAATATTAGAAGATAAAGGTGGGTAAACAGTTCATCCTGTCCCAGCTCCATTTTCTACTATACTTCTTACTAATAGTAAAGTTAATGCAGGGGGTAATAATCAAAAGCTT…
Run 3, Sample 33	LCO1490 + HCO2198	CTmin	-5.43	5	Animalia	Arthropoda	Insecta	Diptera	Anthomyiidae	Delia	Delia fabricii	AAATTTGGATTCTCCTCCTCCAGCGGGATCAAAAAATGAAGTATTTAAATTTCGATCTGTTAATAATATAGTAATAGCTCCAGCTAAAACTGGTAAAGATAATAAAAGAAGTAAAGCTGTAATTACTACTGATCATACAAATAATGGTATTCGATCAAAAGTAATTCCTGTTGATCGTATATTAATTACAGTTGTAATAAAATTTACGGCTCCTAGAATTGATGAAATTCCTGCTAAATGCAGAGAAAAAATTGCTAAATCTACAGAAGCTCCACCATGAGCAATATTAGAAGATAAAGGTGGGTAAACAGTTCATCCTGTCCCAGCTCCATTTTCTACTATACTTCTTACTAATAGTAAAGTTAATGCAGGGGGTAATAATCAAAAGCTTATATTATT…
Run 3, Sample 35	LCO1490 + HCO2198	CTmin	0.73	7	Animalia	Arthropoda	Insecta	Diptera	Anthomyiidae	Delia	Delia fabricii	TGAAAAAATTTGGGATCTCCTCCTCCAGCGGGATCAAAAATGAAGTATTTAAATTTCGATCTGTTAATAATATAGTAATAGCTCCGGCTAAAACTGGTAAAGATAATAAAAGAAGTAAAGCTGTAATTACTACTGATCATACAAATAATGGTATTCGATCAAAAGTAATTCCTGTTGATCGTATATTAATTACAGTTGTAATAAAATTTACGGCTCCTAGAATTGATGAAATTCCTGCTAAATGCAGAGAAAAAATTGCTAAATCTACAGAAGCTCCACCATGAGCAATATTAGAAGATAAAGGTGGGTAAACAGTTCATCCTGTCCCAGCTCCATTTTCTACTATACTTCTTACTAATAGTAAAGTTAATGCAGGGGGTAATAATCAAAAGCTTATAT…
Run 4, Sample 102	LCO1490 + HCO2198	CTmin	-1.37	6	Animalia	Arthropoda	Insecta	Diptera	Anthomyiidae	Delia	Delia fabricii	AAAAATGTTGAAATTAAATTGGGATCTCCTCCTCCAGCGGGATCAAAAAATGAAGTATTTAAATTTCGATCTGTTAATAATATAGTAATAGCTCCAGCTAAAACTGGTAAAGATAATAAAAGAAGTAAAGCTGTAATTACTACTGATCATACAAATAATGGTATTCGATCAAAAGTAATTCCTGTTGATCGTATATTAATTACAGTTGTAATAAAATTTACGGCTCCTAGAATTGATGAAATTCCTGCTAAATGCAGAGAAAAAATTGCTAAATCTACAGAAGCTCCACCATGAGCAATATTAGAAGATAAAGGTGGGTAAACAGTTCATCCTGTCCCAGCTCCATTTTCTACTATACTTCTTACTAATAGTAAAGTTAATGCAGGGGGTAATAATCAA…
Run 4, Sample 17	LCO1490 + HCO2198	CTmin	-6.25	6.5	Animalia	Arthropoda	Insecta	Diptera	Anthomyiidae	Delia	Delia fabricii	AAATTTGGGATTCTCCTCCTCCAGCAGGGATCAAAAAATGAAGTATTTAAATTTCGATCTGTTAATAATATAGTAATAGCTCCAGCTAAAACTGGTAAAGATAATAAAAGAAGTAAAGCTGTAATTACTACTGATCATACAAATAATGGTATTCGATCAAAAGTAATTCCTGTTGATCGTATATTAATTACAGTTGTAATAAAATTTACGGCTCCTAGAATTGATGAAATTCCTGCTAAATGCAGAGAAAAAATTGCTAAATCTACAGAAGCTCCACCATGAGCAATATTAGAAGATAAAGGTGGGTAAACAGTTCATCCTGTCCCAGCTCCATTTTCTACTATACTTCTTACTAATAGTAAAGTTAATGCAGGGGGTAATAATCAAAAGCTTATATTA…
Run 4, Sample 3	LCO1490 + HCO2198	CTmin	-6.1	7	Animalia	Arthropoda	Insecta	Diptera	Anthomyiidae	Delia	Delia fabricii	TTGGAAATTAAATTGGGATCTCCTCCTCCAGCGGGATCAAAAATGAAGTATTTAAATTTCGATCTGTTAATAATATAGTAATAGCTCCAGCTAAAACTGGTAAAGATAATAAAAGAAGTAAAGCTGTAATTACTACTGATCATACAAATAATGGTATTCGATCAAAAGTAATTCCTGTTGATCGTATATTAATTACAGTTGTAATAAAATTTACGGCTCCTAGAATTGATGAAATTCCTGCTAAATGCAGAGAAAAAATTGCTAAATCTACAGAAGCTCCACCATGAGCAATATTAGAAGATAAAGGTGGGTAAACAGTTCATCCTGTCCCAGCTCCATTTTCTACTATACTTCTTACTAATAGTAAAGTTAATGCAGGGGGTAATAATCAAAAGCTTA…
Run 4, Sample 95	LCO1490 + HCO2198	CTmin	-5.58	5	Animalia	Arthropoda	Insecta	Diptera	Anthomyiidae	Delia	Delia fabricii	AAAATGTTGAAATAAATTGGGATCTCCTCCTCCAGCGGGATCAAAAAATGAAGTATTTAAATTTCGATCTGTTAATAATATAGTAATAGCTCCAGCTAAAACTGGTAAAGATAATAAAAGAAGTAAAGCTGTAATTACTACTGATCATACAAATAATGGTATTCGATCAAAAGTAATTCCTGTTGATCGTATATTAATTACAGTTGTAATAAAATTTACGGCTCCTAGAATTGATGAAATTCCTGCTAAATGCAGAGAAAAAATTGCTAAATCTACAGAAGCTCCACCATGAGCAATATTAGAAGATAAAGGTGGGTAAACAGTTCATCCTGTCCCAGCTCCATTTTCTACTATACTTCTTACTAATAGTAAAGTTAATGCAGGGGGTAATAATCAAAA…
Run 5, Sample 28	LCO1490 + HCO2198	CTmax	43.62	7	Animalia	Arthropoda	Insecta	Diptera	Anthomyiidae	Delia	Delia fabricii	AAAAGGTTGATTTAAAATGGGATCTCCTCCTCCAGCGGGATCAAAAATGAAGTATTTAAATTTCGATCTGTTAATAATATAGTAATAGCTCCAGCTAAAACTGGTAAAGATAATAAAAGAAGTAAAGCTGTAATTACTACTGATCATACAAATAATGGTATTCGATCAAAAGTAATTCCTGTTGATCGTATATTAATTACAGTTGTAATAAAATTTACGGCTCCTAGAATTGATGAAATTCCTGCTAAATGCAGAGAAAAAATTGCTAAATCTACAGAAGCTCCACCATGAGCAATATTAGAAGATAAAGGTGGGTAAACAGTTCATCCTGTCCCAGCTCCATTTTCTACTATACTTCTTACTAATAGTAAAGTTAATGCAGGGGGTAATAATCAAAAG…
Run 5, Sample 5	LCO1490 + HCO2198	CTmax	43.42	7	Animalia	Arthropoda	Insecta	Diptera	Anthomyiidae	Delia	Delia fabricii	TGTTGAAATTAAATTGGGATCTCCTCCTCCAGCGGGATCAAAAAATGAAGTATTTAAATTTCGATCTGTTAATAATATAGTAATAGCTCCAGCTAAAACTGGTAAAGATAATAAAAGAAGTAAAGCTGTAATTACTACTGATCATACAAATAATGGTATTCGATCAAAAGTAATTCCTGTTGATCGTATATTAATTACAGTTGTAATAAAATTTACGGCTCCTAGAATTGATGAAATTCCTGCTAAATGCAGAGAAAAAATTGCTAAATCTACAGAAGCTCCACCATGAGCAATATTAGAAGATAAAGGTGGGTAAACAGTTCATCCTGTCCCAGCTCCATTTTCTACTATACTTCTTACTAATAGTAAAGTTAATGCAGGGGGTAATAATCAAAAGCT…
Run 5, Sample 7	LCO1490 + HCO2198	CTmax	42.78	6	Animalia	Arthropoda	Insecta	Diptera	Anthomyiidae	Delia	Delia fabricii	AAAAATGTTGAAATTAAATTGGGATCTCCTCCTCCAGCGGGATCAAAAAATGAAGTATTTAAATTTCGATCTGTTAATAATATAGTAATAGCTCCAGCTAAAACTGGTAAAGATAATAAAAGAAGTAAAGCTGTAATTACTACTGATCATACAAATAATGGTATTCGATCAAAAGTAATTCCTGTTGATCGTATATTAATTACAGTTGTAATAAAATTTACGGCTCCTAGAATTGATGAAATTCCTGCTAAATGCAGAGAAAAAATTGCTAAATCTACAGAAGCTCCACCATGAGCAATATTAGAAGATAAAGGTGGGTAAACAGTTCATCCTGTCCCAGCTCCATTTTCTACTATACTTCTTACTAATAGTAAAGTTAATGCAGGGGGTAATAATCAA…
Run 6, Sample 35	LCO1490 + HCO2198	CTmax	42.49	6.2	Animalia	Arthropoda	Insecta	Diptera	Anthomyiidae	Delia	Delia fabricii	AGTTGAAATAAATTGGGATCTCCTCCTCCAGCGGGATCAAAAAATGAAGTATTTAAATTTCGATCTGTTAATAATATAGTAATAGCTCCAGCTAAAACTGGTAAAGATAATAAAAGAAGTAAAGCTGTAATTACTACTGATCATACAAATAATGGTATTCGATCAAAAGTAATTCCTGTTGATCGTATATTAATTACAGTTGTAATAAAATTTACGGCTCCTAGAATTGATGAAATTCCTGCTAAATGCAGAGAAAAAATTGCTAAATCTACAGAAGCTCCACCATGAGCAATATTAGAAGATAAAGGTGGGTAAACAGTTCATCCTGTCCCAGCTCCATTTTCTATTATACTTCTTACTAATAGTAAAGTTAATGCAGGGGGTAATAATCAAAAGCTT…
Run 6, Sample 40	LCO1490 + HCO2198	CTmax	42.52	6.7	Animalia	Arthropoda	Insecta	Diptera	Anthomyiidae	Delia	Delia fabricii	ATGTTGAATAAAATTGGGATCTCCTCCTCCAGCGGGATCAAAAATGAAGTATTTAAATTTCGATCTGTTAATAATATAGTAATAGCTCCAGCTAAAACTGGTAAAGATAATAAAAGAAGTAAAGCTGTAATTACTACTGATCATACAAATAATGGTATTCGATCAAAAGTAATTCCTGTTGATCGTATATTAATTACAGTTGTAATAAAATTTACGGCTCCTAGAATTGATGAAATTCCTGCTAAATGCAGAGAAAAAATTGCTAAATCTACAGAAGCTCCACCATGAGCAATATTAGAAGATAAAGGTGGGTAAACAGTTCATCCTGTCCCAGCTCCATTTTCTACTATACTTCTTACTAATAGTAAAGTTAATGCAGGGGGTAATAATCAAAAGCTT…
Run 6, Sample 44	LCO1490 + HCO2198	CTmax	34.13	7	Animalia	Arthropoda	Insecta	Diptera	Anthomyiidae	Delia	Delia fabricii	TTGAAATTAAATTGGGATCTCCTCCTCCAGCGGGATCAAAAATGAAGTATTTAAATTTCGATCTGTTAATAATATAGTAATAGCTCCAGCTAAAACTGGTAAAGATAATAAAAGAAGTAAAGCTGTAATTACTACTGATCATACAAATAATGGTATTCGATCAAAAGTAATTCCTGTTGATCGTATATTAATTACAGTTGTAATAAAATTTACGGCTCCTAGAATTGATGAAATTCCTGCTAAATGCAGAGAAAAAATTGCTAAATCTACAGAAGCTCCACCATGAGCAATATTAGAAGATAAAGGTGGGTAAACAGTTCATCCTGTCCCAGCTCCATTTTCTACTATACTTCTTACTAATAGTAAAGTTAATGCAGGGGGTAACAATCAAAAGCTTAT…
Run 6, Sample 52	LCO1490 + HCO2198	CTmax	42.67	5.9	Animalia	Arthropoda	Insecta	Diptera	Anthomyiidae	Delia	Delia fabricii	AAAATGTTGAATTAAAATTGGGATCTCCTCCTCCAGCGGGATCAAAAAATGAAGTATTTAAATTTCGATCTGTTAATAATATAGTAATAGCTCCAGCTAAAACTGGTAAAGATAATAAAAGAAGTAAAGCTGTAATTACTACTGATCATACAAATAATGGTATTCGATCAAAAGTAATTCCTGTTGATCGTATATTAATTACAGTTGTAATAAAATTTACGGCTCCTAGAATTGATGAAATTCCTGCTAAATGCAGAGAAAAAATTGCTAAATCTACAGAAGCTCCACCATGAGCAATATTAGAAGATAAAGGTGGGTAAACAGTTCATCCTGTCCCAGCTCCATTTTCTACTATACTTCTTACTAATAGTAAAGTTAATGCAGGGGGTAATAATCAAA…
Run 6, Sample 59	LCO1490 + HCO2198	CTmax	42.88	6.5	Animalia	Arthropoda	Insecta	Diptera	Anthomyiidae	Delia	Delia fabricii	AGGTTGATTAAAATTGGGATCTCCTCCTCCAGCGGGATCAAAAATGAAGTATTTAAATTTCGATCTGTTAATAATATAGTAATAGCTCCAGCTAAAACTGGTAAAGATAATAAAAGAAGTAAAGCTGTAATTACTACTGATCATACAAATAATGGTATTCGATCAAAAGTAATTCCTGTTGATCGTATATTAATTACAGTTGTAATAAAATTTACGGCTCCTAGAATTGATGAAATTCCTGCTAAATGCAGAGAAAAAATTGCTAAATCTACAGAAGCTCCACCATGAGCAATATTAGAAGATAAAGGTGGGTAAACAGTTCATCCTGTCCCAGCTCCATTTTCTACTATACTTCTTACTAATAGTAAAGTTAATGCAGGGGGTAATAATCAAAAGCTT…
Run 6, Sample 6	LCO1490 + HCO2198	CTmax	44.08	7	Animalia	Arthropoda	Insecta	Diptera	Anthomyiidae	Delia	Delia fabricii	AAAAATGTTGATATTAAATTGGGATCTCCTCCTCCAGCGGGATCAAAAATGAAGTATTTAAATTTCGATCTGTTAATAATATAGTAATAGCTCCAGCTAAAACTGGTAAAGATAATAAAAGAAGTAAAGCTGTAATTACTACTGATCATACAAATAATGGTATTCGATCAAAAGTAATTCCTGTTGATCGTATATTAATTACAGTTGTAATAAAATTTACGGCTCCTAGAATTGATGAAATTCCTGCTAAATGCAGAGAAAAAATTGCTAAATCTACAGAAGCTCCACCATGAGCAATATTAGAAGATAAAGGTGGGTAAACAGTTCATCCTGTCCCAGCTCCATTTTCTACTATACTTCTTACTAATAGTAAAGTTAATGCAGGGGGTAATAATCAAA…
Run 6, Sample 73	LCO1490 + HCO2198	CTmax	43.59	6.5	Animalia	Arthropoda	Insecta	Diptera	Anthomyiidae	Delia	Delia fabricii	GTTGATATTAAATTGGGATCTCCTCCTCCAGCGGGATCAAAAAATGAAGTATTTAAATTTCGATCTGTTAATAATATAGTAATAGCTCCAGCTAAAACTGGTAAAGATAATAAAAGAAGTAAAGCTGTAATTACTACTGATCATACAAATAATGGTATTCGATCAAAAGTAATTCCTGTTGATCGTATATTAATTACAGTTGTAATAAAATTTACGGCTCCTAGAATTGATGAAATTCCTGCTAAATGCAGAGAAAAAATTGCTAAATCTACAGAAGCTCCACCATGAGCAATATTAGAAGATAAAGGTGGGTAAACAGTTCATCCTGTCCCAGCTCCATTTTCTACTATACTTCTTACTAATAGTAAAGTTAATGCAGGGGGTAATAATCAAAAGCTT…
Run 1, Sample 83	LCO1490 + HCO2198	CTmax	22.78	4.2	Animalia	Arthropoda	Insecta	Diptera	Anthomyiidae	Delia	Delia platura	GGTGGGATAAATTGGGATCTCCTCCTCCTGCAGGGTCAAAAAATGATGTATTTAGATTTCGATCTGTTAATAGTATAGTGATGGCACCAGCTAATACCGGTAAAGATAGTAAAAGAAGTAATGCTGTAATTACTACTGATCAAACAAATAAAGGTATTCGATCAAAAGTAATTCCTGTAGATCGTATATTAATTACAGTAGTAATAAAATTTACGGCTCCTAAAATTGATGAAATTCCTGCTAAATGTAAAGAAAAAATTGCTAAATCAACAGAAGCTCCGCCATGAGCGATATTAGAAGATAAAGGTGGGTAAACAGTTCATCCTGTCCCAGCTCCATTTTCTACTATACTTCTTACTAACAATAAAGTTAATGCAGGAGGTAGAAGTCAAAAACTTA…
Run 3, Sample 14	LCO1490 + HCO2198	CTmin	-1	5.1	Animalia	Arthropoda	Insecta	Diptera	Dolichopodidae	Dolichopus	Dolichopus groenlandicus	TAGAAGTGAGTATTTAAGTTTCGATCTGTTAAAAATATTGTAATAATTCCCGCTAGTACTGGTAAAGATAGTAATCATAAAATAGCAGTAATTACTACTGATCATACAAAAAGAGGTATTCGGTCAAATGTAATACCTGTTGATCGTATATTAATAACTGTTGTAATAAAATTTACAGCTCCTAAAATAGATGAAATACCGGCTAAATGAAGGGAAAAAATTGCTAAATCTACAGATGCTCCTCCATGAGCAACCCCCGC	0.94
Run 3, Sample 18	LCO1490 + HCO2198	CTmin	-4.63	5.3	Animalia	Arthropoda	Insecta	Diptera	Dolichopodidae	Dolichopus	Dolichopus plumipes	TCTCCACCCTCCCTGCTGGGTCAGAGAATGAGGTATTTAGGATTTCGATCTGTTAAAAGTATTGTAATAGCTCCAGCTAATACTGGTAAAGATAATAATAGTAAAATTGCAGTAATTACTACCGATCATACAAAGAGAGGTATTCGGTCAAACGTAATACCCGTTGATCGTATATCAATTACTGTTGTAATAAAGTTTACTGCTCCTAAAATAGATCAAATACCAGCTAAGTGAAGGGAGAAA	96.7 %
Run 1, Sample 47	LCO1490 + HCO2198	CTmax	32.74	9.5	Animalia	Arthropoda	Insecta	Diptera	Syrphidae	Eupeodes	Eupeodes sp.	GTGATAAAAATTGGGATCACCTCCCTCCTGCTGGGTCAAAGAATGATGTATTTAAATTCCGATCAGTTAAAAGTATAGTAATAGCTCCTGCTAATACTGGTAATGATAAAAGTAATAATAAAGCAGTAATTACTACTGATCATACAAATAAAGGTATACGATCATAAGAAATTCCATTAGATCGTATATTAATTACTGTAGTAATAAAATTTACAGCTCCTAAAATTGAAGATATACCAGCTAGATGAAGAGAAAAAATAGCTAAATCAACAGAAGCTCCTCCATGTGCAATACTAGCAGAAAGTGGAGGGTAAACTGTTCAACCAGTTCCAGCTCCATTTTCAACTATTCTTCTTACTAATAAAAGAGTTAAAGATGGAGGTAATAATCAAAAACTTA…
Run 6, Sample 94	LCO1490 + HCO2198	CTmax	35.57	4	Animalia	Arthropoda	Insecta	Diptera	Mycetophilidae	Exechia	Exechia sp.	AAAAAAGGTTGATATTAAATTGGGGTCTCCTCCTCCAGCGGGATCAAAGAATGATGTATTTAAATTTCGGTCTGTTAATAGTATTGTAATAGCACCGGCTAAAACAGGTAAAGATAATAATAGAAGAACAGCTGTAATTAACACTGATCATACAAATAATGGTAATCGATCGAAAGTAATTCCTGGAGCTCGTATATTAATAATAGTAGTAATAAAATTTACTGCTCCTAAAATAGATGAAATACCTGCTAAATGTAGGGAAAAAATAGCAAGATCAACAGATGCACCAGCATGTGCAATTGCTGAAGAAAGAGGAGGATATACAGTTCACCCTGTTCCGGCCCCTGCTTCTACAAGACTACTTGAAAGTAGTAATGTTAAAGAGGGAGGAAGTATTCA…
Run 1, Sample 86	LCO1490 + HCO2198	CTmax	42.7	4	Animalia	Arthropoda	Insecta	Diptera	Fannidae	Fannia	Fannia sp.	AAAAGGTGGGAAAAATTGGGGTCTCCTCCTCCTGCTGGGTCAAAAATGAAGTATTTAAATTACGATCTGTTAATAGTATAGTAATAGCTCCTGCTAAAACTGGCAAGGATAAAAGAAGTAATAAAGCTGTAATTACTACAGATCAAACAAATAGAGGTATTCGGTCTAGAGTAATTCCAGTTGATCGTATATTAATAACAGTAGTAATAAAATTTACAGCTCCTAGAATAGATGAAATTCCAGCTAAATGAAGAGAGAAAATTGCTAAATCAACTGAAGCACCTCCATGTGCAATGTTAGATGAAAGTGGGGGGTAAACAGTTCATCCTGTACCAGCTCCGTTTTCTACTATACTACTTACCAATAATAAAGTTAATGCTGGTGGTAGTAATCAAAAAC…
Run 5, Sample 129	LCO1490 + HCO2198	CTmax	35.23	2.1	Animalia	Arthropoda	Insecta	Diptera	Ceratopogonidae	Forcipomyia	Forcipomyia sp.	AGCTGGTTAAATAGGGTCACCCCCTCCCGCAGGGTCAAAGAAGGATGTATTAAAATTACGATCTGTTAATAATATTGTAATTGCTCCGGCTAATACCGGCAATGAAAGAAGTAAAAGAACAGCAGTAATTAAAACTGATCAAACAAATAAAGGTATTCGGTCAAATGTAATTCCATTTGATCGTATATTAATAATTGTAGTAATAAAATTAACTGCCCCTAAAATTGATGAAATACCAGCCAGATGAAGGGAAAAAATTGCAAAGTCCACAGAGGATCCGGCATGAGAAATATTGGCGGCCAGGGGCGGATAAACCGTTCAGCCTGTTCCGGCCCCATTTTCCACTAAACTGCTAATTAATAGCAGTGAAAGAGAGGGAGGTAATATTCAAAATCTCAT…
Run 5, Sample 29	LCO1490 + HCO2198	CTmax	37.1	4	Animalia	Arthropoda	Insecta	Diptera	Chironomoidae	Halocladius	Halocladius variabilis	AGGTGGGTAAGAATAGGGTCTCCTCCTCCGGCAGGATCAAAGAATGATGTATTTAAATTCCGATCTGTTAATAATATAGTAATGGCTCCAGCTAAAACAGGTAAAGATAATAGTAAAAGGATAGCTGTAATAATTACAGATCAAACAAATAAAGGTATTCGGTCTAAAGTAATTCCTTCAGAACGTATATTAATTACTGTAGTAATAAAATTTACAGCCCCTAAAATAGAAGAAATTCCGGCAAGATGTAAAGAAAAAATAGCTAAATCTACAGAAGCTCCAGCATGAGCAATTCCAGAAGATAGGGGAGGGTACACTGTTCAACCTGTCCCAGCCCCGTTTTCAACAATTGAGCTTGAAAGTAATAAAGTTAAAGAAGGTGGTAATAATCAAAAACTT…
Run 5, Sample 45	LCO1490 + HCO2198	CTmax	33.02	3	Animalia	Arthropoda	Insecta	Diptera	Chironomoidae	Halocladius	Halocladius variabilis	GGGTAAGAATAGGGTCTCCTCCTCCGGCAGGATCAAAGAATGATGTATTTAAATTCCGATCTGTTAATAATATAGTAATGGCTCCAGCTAAAACAGGTAAAGATAATAGTAAAAGGATAGCTGTAATAATTACAGATCAAACAAATAAAGGTATTCGGTCTAAAGTAATTCCTTCAGAACGTATATTAATTACTGTAGTAATAAAATTTACAGCCCCTAAAATAGAAGAAATTCCGGCAAGATGTAAAGAAAAAATAGCTAAATCTACAGAAGCCCCAGCATGAGCAATTCCAGAAGATAGGGGAGGGTACACTGTTCAACCTGTCCCAGCCCCGTTTTCAACAATTGAGCTTGAAAGTAATAAAGTTAAAGAAGGTGGTAATAATCAAAAACTTATAT…
Run 6, Sample 99	LCO1490 + HCO2198	CTmax	38.88	3.1	Animalia	Arthropoda	Insecta	Diptera	Chironomoidae	Halocladius	Halocladius variabilis	AAAGGAATAGGGTCTCCTCCTCCGGCAGGATCAAAGAATGATGTATTTAAATTCCGATCTGTTAATAATATAGTAATGGCTCCAGCTAAAACAGGTAAAGATAATAGTAAAAGGATAGCTGTAATAATTACAGATCAAACAAATAAAGGTATTCGGTCTAAAGTAATTCCTTCAGAACGTATATTAATTACTGTAGTAATAAAATTTACAGCCCCTAAAATAGAAGAAATTCCGGCAAGATGTAAAGAAAAAATAGCTAAATCTACAGAAGCTCCAGCATGAGCAATTCCAGAAGATAGGGGAGGGTACACTGTTCAACCTGTCCCAGCCCCGTTTTCAACAATTGAGCTTGAAAGTAATAAAGTTAAAGAAGGTGGTAATAATCAAAAACTTATATTA…
Run 3, Sample 72	LCO1490 + HCO2198	CTmin	-3.96	3	Animalia	Arthropoda	Insecta	Diptera	Chironomoidae	Hydrobaenus	Hydrobaenus fusistylus	TGGGTTAAAATTGGGATCCCCTCCTCCAGCAGGAATCAAAAAAAGAGGTGTTTAAATTTCGATCTGTTAAAAGCATTGTAATAGCTCCTGCTAAAACTGGAAGAGATAGTAGTAATAAAATAGCTGTAATTACAACGGACCAAACAAATAAGGGTATTCGGTCTAGAGTAATTCCAGCTGATCGTATATTAATAACAGTAGTAATAAAATTTACTGCCCCTAAAATAGAAGAGATTCCAGCTAAATGTAGAGAAAAAATTGCTAAATCTACAGAACCCCCAGCATGGGCAATCCCTGATGAAAGAGGAGGGTAGACAGTTCAACCTGTCCCCGCCCCGTTTTCAACAATTGAGCTAGAGAGCAGTAGGGTTAAAGAAGGAGGTAAAAGTCAAAATCTTA…
Run 5, Sample 22	LCO1490 + HCO2198	CTmax	34.1	4.7	Animalia	Arthropoda	Insecta	Diptera	Keroplatidae	Macrocera	Macrocera sp.	AAAAAGTTGATTAAATAGGGGTCCCCTACCTCCCGCAGGGTCAAAAATGAAGTATTTAAATTTCGATCTGTTAAAAGTATTGTAATAGCTCCGGCTAAAACGGGAAGGGATAAAAGAAGTAAGATAGCAGTAATTAAGACTGATCATACAAATAAAGGCATCATATCAAAATTTATTCCAGGAGATCGTATATTAATAATTGTTGTGATAAAATTTACTGCCCCTAAAATTGAGGAAATTCCGGCTAAATGTAAAGAAAAAATTGCTAAATCAACTGATGCCCCTGAATGAGAAATAGTTGTAGATAAAGGAGGATAAACTGTTCAACCTGTCCCAGCTCCATTTTCGATTAAGCTACTTAATAATAATAAAGTTAATGAAGGGGGGAGTATTCAAAAT…
Run 5, Sample 30	LCO1490 + HCO2198	CTmax	41.01	8	Animalia	Arthropoda	Insecta	Diptera	Syrphidae		Syrphidae sp.	AAAAGTTGAATAAAATAGGATCTCCTCCTCCGGCTGGGTCAAAAAAGAAGTATTTAAATTTCGGTCTGTTAATAATATTGTAATTGCTCCAGCAAGAACTGGTAATGATAATAAAAGAAGTAAAGCTGTAATTACAACTGATCAAACAAATAATGGTATTCGATCATAAGAAATACCTGTAGAACGTATATTAATTACTGTAGTAATAAAATTTACTGCTCCTAGAATTGAGGATATACCAGCTAAATGAAGAGAAAAAATAGCTAAATCAACAGAAGCTCCACCGTGAGCAATTCTAGAAGAAAGAGGAGGGTAAACAGTTCATCCTGTACCAGCTCCATTTTCTACTATACTTCTTACTAATAATAAAGTTAATGAAGGAGGAAGTAATCAAAAACT…
Run 5, Sample 55	LCO1490 + HCO2198	CTmax	43.2	7	Animalia	Arthropoda	Insecta	Diptera	Syrphidae		Syrphidae sp.	AGGTTGAATAAATAGGATCTCCTCCTCCGGCTGGGTCAAAAAAGAAGTATTTAAATTTCGGTCTGTTAATAATATTGTAATTGCTCCAGCAAGAACTGGTAATGATAATAAAAGAAGTAAAGCTGTAATTACAACTGATCAAACAAATAATGGTATTCGATCATAAGAAATACCTGTAGAACGTATATTAATTACTGTAGTAATAAAATTTACTGCTCCTAGAATTGAGGATATACCAGCTAAATGAAGAGAAAAAATAGCTAAATCAACAGAAGCTCCACCATGAGCAATTCTAGAAGAAAGAGGAGGGTAAACAGTTCATCCTGTACCAGCTCCATTTTCTACTATACTTCTTACTAATAATAAAGTTAATGAAGGAGGAAGTAATCAAAAACTTAT…
Run 5, Sample 94	BR2 + BF3	CTmax	41.94	8	Animalia	Arthropoda	Insecta	Diptera	Syrphidae		Syrphidae sp.	CGGAATGGTTTGGATATAAATTAGGTTACTCCTCCTCCGGCTGGGTCAAAAAAGAAGTATTTAAATTTCGCGTCTGTTAATAATATTGTAATTGCTCCAGCAAGAACTGGTAATGATAATAAAAGAAGTAAAGCTGTAATTACAACTGATCAAACAAATAATGGTATTCGATCATAAGAAATACCTGTAGAACGTATATTAATTACTGTAGTAATAAAATTTACTGCTCCTAGAATTGAGGATATACCAGCTAAATGAAGAGAAAAAATAGCTAAATCAACAGAAGCTCCACCATGAGCAATTCTAGAAGAAAGAGGAGGGTAAACAGTTCATCCTGTACCAGCTCCATTTTCTACTATACTTCTTACTAATAATAAAGTTAATGAAGGAGGAAGTAAT…	97.64 %
Run 4, Sample 18	BR2 + BF3	CTmin	7.55	7	Animalia	Arthropoda	Insecta	Diptera	Syrphidae		Syrphidae sp.	CCCCGCAAGAACTGGTAATGATAATAAAAGAAGTAAAGCTGTAATTACAACTGATCAAACAAATAAGGGTATTCGATCATAAGAAATACCTGTAGAACGTATATTAATTACTGTAGTAATAAAATTTACTGCTCCTAAAATTGAGGATATACCAGCTAAATGAAGAGAAAAAATAGCTAAATCAACAGAAGCTCCACCATGAGCAATTCTAGAAGAAAGAGGAGGGTAAACAGTTCATCCTGTACCACCTCCATTTTCTACTATACTTCTTACTAATAATAAAGTTAATGAAGGAGGAAGTAATCAAAAACTTATATTATTTATTCGGGGAAAAGCT
Run 6, Sample 38	LCO1490 + HCO2198	CTmax	35.18	4.7	Animalia	Arthropoda	Insecta	Diptera	Mycetophilidae	Mycetophila	Mycetophila sp.	GTGGGTTAAATAGGGGTCTCCTCCTCCAGCAGGATCGAAGAATGAAGTATTTAAATTACGATCAGTAAGTAATATAGTAATTGCTCCAGCTAAAACTGGTAATGATAGTAGTAATAATACAGCTGTAATTAAAACTGATCAAACAAATAAAGGTAGTCGATCAAATGTTATTCCAGGAGCTCGTATATTAATAATTGTAGTAATAAAATTAATAGCTCCTAAAATTGATGAAATACCAGCAAGATGTAATGAAAAAATTGCTAAATCAACTGAAGATCCAGCGTGGGCAATAGTAGATGAAAGTGGGGGGTACACTGTCCATCCTGTCCCAGCCCCTGCTTCAACTAAGCTACTTGAAAGTAATAAAGTTAAAGAAGGAGGTAAAAGTCAAAATCTTAT…
Run 2, Sample 82	BR2 + BF3	CTmin	-2.49	6	Animalia	Arthropoda	Insecta	Diptera	Anthomyiidae	Pegomya	Pegomya notabilis	AAAAAAAAATGGTTTGGATATAAAATTGGGAACTCCTCCTCCTGCGGGATCAAAAAATGAAGTATTTAAATTTCGATCTGTTAATAATATAGTAATAGCTCCAGCTAATACTGGTAATGATAATAAAAGTAATAATGCTGTAATTACTACAGATCAAACAAATAAAGGTATTCGATCAAATGTAATTCCTGTAGATCGTATATTAATTACTGTAGTAATAAAATTTACTGCTCCTAAAATTGAAGAGATTCCTGCTAAGTGTAAAGAAAAAATAGCTAAATCAACAGAAGCTCCACCATGAGCAATATTAGAAGATAGTGGAGGATAAACAGTTCATCCTGTTCCAGCTCCGTTTTCTACTATACTACTTACTAATAATAAAGTTAATGCAGGAGGTAA…	97.74 %
Run 4, Sample 61	BR2 + BF3	CTmin	-1.98	7.5	Animalia	Arthropoda	Insecta	Diptera	Anthomyiidae	Pegomya	Pegomya notabilis	AAAAAAATAAATGGTTTGGAAATAAAATTGGGAACTCCTCCTCCTGCGGGATCAAAAAATGAAGTATTTAAATTTCGATCTGTTAATAATATAGTAATAGCTCCAGCTAATACTGGTAATGATAATAAAAGTAATAATGCTGTAATTACTACAGATCAAACAAATAAAGGTATTCGATCAAATGTAATTCCTGTAGATCGTATATTAATTACTGTAGTAATAAAATTTACTGCTCCTAAAATTGAAGAGATTCCTGCTAAGTGTAAAGAAAAAATAGCTAAATCAACAGAAGCTCCACCATGAGCAATATTAGAAGATAGTGGAGGATAAACAGTTCATCCTGTTCCAGCTCCGTTTTCTACTATACTACTTACTAATAATAAAGTTAATGCAGGAGGT…
Run 2, Sample 81	BR2 + BF3	CTmin	-2.48	4.7	Animalia	Arthropoda	Insecta	Diptera	Anthomyiidae	Pegomya	Pegomya sp.	TTAAATTTCGATCTGTTAATAATATAGTAATAGCTCCAGCTAATACTGGTAATGATAATAAAAGTAATAATGCTGTAATTACTACAGATCAAACAAATAAAGGTATTCGATCAAATGTAATTCCTGTAGATCGTATATTAATTACTGTAGTAATAAAATTTACTGCTCCTAAAATTGAAGAGATTCCTGCTAAGTGTAAAGAAAAAATAGCTAAATCAACAGAAGCTCCACCATGAGCAATATTAGAAGATAGTGGAGGATAAACAGTTCATCCTGTTCCAGCTCCGTTTTCTACTATACTACTTACTAATAATAAAGTTAATGCAGGAGGTAAAAGTCAAAAACTTATATTATTTATTCGGGGAAAGGCT
Run 2, Sample 83	BR2 + BF3	CTmin	6.52	6	Animalia	Arthropoda	Insecta	Diptera	Anthomyiidae	Pegomya	Pegomya sp.	TGGAATACTCCTCCTCCTGCAGGGTCAAAAAATGAAGTATTTAAATTTCGATCCGTTAATAATATAGTAATAGCTCCAGCTAATACTGGTAATGATAATAAAAGTAATAGTGCTGTAATTACTACAGATCAAACAAATAAAGGTATTCGATCAAATGTAATTCCTGTAGATCGTATATTAATTACTGTAGTAATAAAATTTACTGCTCCTAAAATTGAAGAAATTCCTGCTAAATGTAAAGAAAAAATAGCTAAATCAACAGAAGCTCCACCATGAGCAATATTAGAAGATAGTGGAGGGTAAACAGTTCATCCTGTTCCAGCTCCGTTTTCTACTATACTACTTACTAATAATAAAGTTAATGCAGGAGGTAAAAGTCAAAAACTTATATTATTTATT…
Run 5, Sample 120	BR2 + BF3	CTmax	37.4	5.3	Animalia	Arthropoda	Insecta	Diptera	Anthomyiidae	Pegomya	Pegomya sp.	AACAAATAAGGGTATTCGATCAAATGTAATTCCTGTAGATCGTATATTAATTACTGTAGTAATAAAATTTACTGCTCCTAAAATTGAAGAAATTCCTGCTAAATGTAAAGAAAAAATAGCTAAATCAACAGAAGCTCCACCATGAGCAATATTAGAAGATAGTGGAGGGTAAACAGTTCATCCTGTTCCAGCTCCGTTTTCTACTATACTACTTACTAATAATAAAGTTAATGCAGGAGGTAAAAGTCAAAAACTTATATTATTTATTCGGGGAAATGCCAT	89.51 %
Run 2, Sample 88	LCO1490 + HCO2198	CTmin	-1.36	6	Animalia	Arthropoda	Insecta	Diptera	Anthomyiidae	Pegomya	Pegomya sp.	AAATACAGGGCATGAGCTGTTACAATTACGTTATAAATTTGATCATCACCAATAAGTGCTCCTGGATGTCCTAGTTCAGCTCGGAATTAAAATACTTAACGAAGTACCTACTATTCCTGATCATGCTCCGAGACATAAGATATAGATGTTCC
Run 4, Sample 11	BR2 + BF3	CTmin	-1.02	5.5	Animalia	Arthropoda	Insecta	Diptera	Anthomyiidae	Pegomya	Pegomya sp.	GTATTTCTTTTTCGATCTGTTAATAATATAGTAATAGCTCCAGCTAATACTGGTAATGATAATAAAAGTAATAATGCTGTAATTACTACAGATCAAACAAATAAAGGTATTCGATCAAATGTAATTCCTGTAGATCGTATATTAATTACTGTAGTAATAAAATTTACTGCTCCTAAAATTGAAGAGATTCCTGCTAAGTGAAAAGAAAAAATAGCTAAATCAACAGAACCTCCACCATGAGCAATATTAGAAGATAGTGGAGGATAAACAGTTCATCCTGTTCCACCTCCGTTTTCTACTATACTACTTACTAATAATAAAGTTAAGGCAGGAGGTAAAAGTCAAAAACTTATATTATTTATTCGGGGAAAGGCTATGTCGGG
Run 3, Sample 15	BR2 + BF3	CTmin	-2.43	5.8	Animalia	Arthropoda	Insecta	Diptera	Anthomyiidae	Pegomya	Pegomya zonata	GGATATAAATTGGGTACTCCTCCTCCTGCAGGGTCAAAAAATGAAGTATTTCAATTTCGATCCGTTAATAATATAGTAATAGCTCCAGCTAATACTGGTAATGATAATAAAAGTAATAGTGCTGTAATTACTACAGATCAAACAAATAAAGGTATTCGATCAAATGTAATTCCTGTAGATCGTATATTAATTACTGTAGTAATAAAATTTACTGCTCCTAAAATTGAAGAAATTCCTGCTAAATGTAAAGAAAAAATAGCTAAATCAACAGAAGCTCCACCATGAGCAATATTAGAAGATAGTGGAGGGTAAACAGTTCATCCTGTTCCAGCTCCGTTTTCTACTATACTACTTACTAATAATAAAGTTAATGCAGGAGGTAAAAGTCAAAAACTTATA…
Run 5, Sample 121	LCO1490 + HCO2198	CTmax	40.58	2.8	Animalia	Arthropoda	Insecta	Diptera	Piophilidae	Piophila	Piophila sp.	AAAAAGGTGGGTAAGAATTGGGGTCTCCTCCTCCTGCTGGGTCAAAGAATGAAGTATTTAAATTTCGATCTGTTAATAATATTGTAATTGCTCCTGCTAGAACAGGTAGAGATAAAAGTAATAATAAAGCTGTAATTACAACAGATCAAACAAATAAAGGTATTCGATCAAAAGTGATACCTGTAGATCGTATATTAATTACAGTTGTGATAAAATTTACAGCTCCTAAAATTGAAGAAATTCCTGCGAGGTGAAGGGAAAAAATAGCTAAATCAACAGAAGCCCCTCCATGAGCAATAACAGAAGAAAGAGGAGGGTAAACTGTTCAACCTGTACCAGCTCCGTTTTCTACTATACTTCTTACTAATAGTAGCGTAAGAGAAGGAGGTAATATTCAAA…
Run 2, Sample 86	BR2 + BF3	CTmin	-4.72	3.5	Animalia	Arthropoda	Insecta	Diptera	Calliphoridae	Protophormia	Protophormia terranovae	AGGGACTCCTCCTCCAGCTGGATCAAAAAATGAAGTATTTAAATTTCGGTCAGTTAATAATATAGTAATAGCACCTGCTAATACTGGTAAAGATAATAAAAGTAAAAGAGCAGTAATAACTACAGATCAAACAAATAAAGGTATTCGATCAAATGTAATTCCTGTAGATCGTATATTAATTACAGTTGTAATGAAATTTACAGCTCCTAAAATTGAAGAAATTCCGGCCAAGTGAAGAGAGAAAATAGCTAAATCAACAGATGCTCCTCCGTGAGCAATATTAGAAGATAAAGGTGGGTAGACAGTTCATCCTGTTCCAGCCCCATTTTCTACTATACTACTTACTAATAATAAAGTTAATGCAGGAGGTAAAAGTCAGAAACTTATATTATTTATTCG…
Run 3, Sample 49	LCO1490 + HCO2198	CTmin	0.51	10.3	Animalia	Arthropoda	Insecta	Diptera	Calliphoridae	Protophormia	Protophormia terranovae	AGGTGGGTTAAATAGGGGTCTCCTCCTCCAGCTGGATCAAAAAATGAAGTATTTAAATTTCGGTCAGTTAATAATATAGTAATAGCACCTGCTAATACTGGTAAAGATAATAAAAGTAAAAGAGCAGTAATAACTACAGATCAAACAAATAAAGGTATTCGATCAAATGTAATTCCTGTAGATCGTATATTAATTACAGTTGTAATGAAATTTACAGCTCCTAAAATTGAAGAAATTCCGGCCAAGTGAAGAGAGAAAATAGCTAAATCAACAGATGCTCCTCCGTGAGCAATATTAGAAGATAAAGGTGGGTAGACAGTTCATCCTGTTCCAGCCCCATTTTCTACTATACTACTTACTAATAATAAAGTTAATGCAGGAGGTAAAAGTCAGAAACTT…
Run 4, Sample 112	LCO1490 + HCO2198	CTmin	-1.06	9.2	Animalia	Arthropoda	Insecta	Diptera	Calliphoridae	Protophormia	Protophormia terranovae	GGTGGGTTAAATAGGGGTCTCCTCCCTCCAGCTGGGATCAAAAATGAAGTATTTAAATTTCGGTCAGTTAATAATATAGTAATAGCACCTGCTAATACTGGTAAAGATAATAAAAGTAAAAGAGCAGTAATAACTACAGATCAAACAAATAAAGGTATTCGATCAAATGTAATTCCTGTAGATCGTATATTAATTACAGTTGTAATGAAATTTACAGCTCCTAAAATTGAAGAAATTCCGGCCAAGTGAAGAGAGAAAATAGCTAAATCAACAGATGCTCCTCCGTGAGCAATATTAGAAGATAAAGGTGGGTAGACAGTTCATCCTGTTCCAGCCCCATTTTCTACTATACTACTTACTAATAATAAAGTTAATGCAGGAGGTAAAAGTCAGAAACTT…
Run 4, Sample 130	LCO1490 + HCO2198	CTmin	-1.68	10	Animalia	Arthropoda	Insecta	Diptera	Calliphoridae	Protophormia	Protophormia terranovae	GGGATAAATAGGGGTCTCCTCCTCCAGCTGGGATCAAAAAATGAAGTATTTAAATTTCGGTCAGTTAATAATATAGTAATAGCACCTGCTAATACTGGTAAAGATAATAAAAGTAAAAGAGCAGTAATAACTACAGATCAAACAAATAAAGGTATTCGATCAAATGTAATTCCTGTAGATCGTATATTAATTACAGTTGTAATGAAATTTACAGCTCCTAAAATTGAAGAAATTCCGGCCAAGTGAAGAGAGAAAATAGCTAAATCAACAGATGCTCCTCCGTGAGCAATATTAGAAGATAAAGGTGGGTAAACAGTTCATCCTGTTCCAGCCCCATTTTCTACTATACTACTTACTAATAATAAAGTTAATGCAGGAGGTAAAAGTCAGAAACTTATA…
Run 6, Sample 113	LCO1490 + HCO2198	CTmax	35.89	10	Animalia	Arthropoda	Insecta	Diptera	Calliphoridae	Protophormia	Protophormia terranovae	AGGTGGGTTAAATAGGGGTCTCCTCCTCCAGCTGGGATCAAAAAATGAAGTATTTAAATTTCGGTCAGTTAATAATATAGTAATAGCACCTGCTAATACTGGTAAAGATAATAAAAGTAAAAGAGCAGTAATAACTACAGATCAAACAAATAAAGGTATTCGATCAAATGTAATTCCTGTAGATCGTATATTAATTACAGTTGTAATGAAATTTACAGCTCCTAAAATTGAAGAAATTCCGGCCAAGTGAAGAGAGAAAATAGCTAAATCAACAGATGCTCCTCCGTGAGCAATATTAGAAGATAAAGGTGGGTAAACAGTTCATCCTGTTCCAGCCCCATTTTCTACTATACTACTTACTAATAATAAAGTTAATGCAGGAGGTAAAAGTCAGAAACT…
Run 6, Sample 135	LCO1490 + HCO2198	CTmax	33.73	10	Animalia	Arthropoda	Insecta	Diptera	Calliphoridae	Protophormia	Protophormia terranovae	GGTGGGTATAAATAGGGGTCTCCTCCTCCAGCTGGGATCAAAAAATGAAGTATTTAAATTTCGGTCAGTTAATAATATAGTAATGGCACCTGCTAATACTGGTAAAGATAATAAAAGTAAAAGAGCAGTAATAACTACAGATCAAACAAATAAAGGTATTCGATCAAATGTAATTCCTGTAGATCGTATATTAATTACAGTTGTAATGAAATTTACAGCTCCTAAAATTGAAGAAATTCCGGCCAAGTGAAGAGAGAAAATAGCTAAATCAACAGATGCTCCTCCGTGAGCAATATTAGAAGATAAAGGTGGGTAGACAGTTCATCCTGTTCCAGCCCCATTTTCTACTATACTACTTACTAATAATAAAGTTAATGCAGGAGGTAAAAGTCAGAAACT…
Run 4, Sample 98	LCO1490 + HCO2198	CTmin		5.5	Animalia	Arthropoda	Insecta	Diptera	Scathophagidae	Scathophaga	Scathophaga inquinata	ATAAAAAAAATAATATGGCTGTAATTACTACTGATCATACAAATAAAGGTATTCGATCAAAAGTAATTCCTGTTGATCGTATATTAATTACTGTTGTAATAAAATTTACAGCTCCTAAAATTGATGAAATTCCTGCTAAATGAAGAGAAAAAATTGCTAGGTCTACTGAAGCTCCTCCATGAGCAATATTTGAAGAGAGAGGAGGGTAAACTGTTCATCCTGTTCCAGCTCCGTTTTCTACTATATGTAGCTTGATAACAGTAAGGTTAATGAGGGAGGTAAAAGTCAAAATCTTATATTATTTATTCGAGGAAAAGCTATATCAGGAGCACCTAATATAAGAGGAACTAATCAATTTCCAAATCCTCCAATTATAATTGGTATTACTATAAAAAAAAT…	0.93
Run 5, Sample 17	LCO1490 + HCO2198	CTmax	40.12	7	Animalia	Arthropoda	Insecta	Diptera	Scathophagidae	Scathophaga	Scathophaga litorea	ATTAGGGATCTCCTCCTCCAGCAGGGTCAAAGAATGAAGTATTAAGGTTTCGATCAGTTAATAATATAGTAATAGCTCCTGCTAAAACTGGTAAAGATAAAAGAAGTAATAAAGCTGTAATTACTACAGATCATACAAATAAAGGTATTCGGTCAAAAGTAATTCCTGTTGATCGTATATTGATTACTGTTGTAATAAAATTAACAGCTCCTAAAATAGATGAAATTCCTGCTAAATGAAGAGAGAAAATTGCTAAATCAACAGAAGCTCCACCATGAGCGATATTTGAAGATAAAGGAGGGTAAACAGTTCATCCTGTTCCAGCTCCATTTTCTACTATACTACTTACTAATAATAGAGTTAATGCTGGGGGTAAAAGTCAAAAACTTATATTATTTA…
Run 5, Sample 4	LCO1490 + HCO2198	CTmax	38.87	7	Animalia	Arthropoda	Insecta	Diptera	Scathophagidae	Scathophaga	Scathophaga sp.	TTGAAATTAAATTGGGATCACCTCCCTCCTGCTGGGATCAAAAATGATGTATTAAGATTTCGATCAGTTAATAATATAGTAATAGCTCCAGCTAATACTGGTAAAGATAAAAGAAGTAATAAAGCTGTAATTACTACAGATCATACAAATAGAGGTATTCGATCAAAAGTAATTCCTGTTGATCGTATATTAATTACAGTTGTAATAAAATTTACAGCTCCTAAAATAGATGAAATTCCAGCTAAATGAAGAGAAAAAATTGCTAAATCAACAGAAGCTCCTCCATGAGCAATATTTGAAGATAACGGAGGGTAAACAGTTCATCCTGTTCCAGCTCCGTTTTCTACTATACTACTTACTAACAATAAAGTTAGTGCAGGAGGTAAAAGTCAAAAACTT…
Run 5, Sample 90	LCO1490 + HCO2198	CTmax	38.76	5.8	Animalia	Arthropoda	Insecta	Diptera	Scathophagidae	Scathophaga	Scathophaga sp.	TAAATAGGGATCTCCTCCTCCTGCTGGATCAAAAATGATGTATTAAGATTTCGATCTGTTAATAATATAGTAATAGCTCCGGCTAATACTGGTAAAGATAAAAAAAATAAAATGGCTGTAATTACTACTGATCATACAAATAAAGGTATTCGATCAAAAGTAATTCCTTTTGATCGTATATTAATTACTGTTGTAATAAAATTTACAGCTCCTAAAATTGATGAAATTCCTGCTAAATGAAGAGAAAAAATTGCTAGGTCTACTGAAGCTCCTCCATGAGCAATATCTTAGAAGAATGAGAGGAGGGATAAACAGTTCATCCTGTTCCAGCTCCGTTTTCTACTATACTACTTGCATAACAGTAAGGTTAATGAGGGAGGTAAAAGTCAAAATCTTATA…	93.47 %
Run 6, Sample 58	LCO1490 + HCO2198	CTmax	39.48	7	Animalia	Arthropoda	Insecta	Diptera	Scathophagidae	Scathophaga	Scathophaga sp.	GTGGGTATAAATTGGGATCTCCTCCTCCTGCTGGATCAAAAATGATGTATTAAGATTTCGATCAGTTAATAATATAGTAATAGCTCCAGCTAATACTGGTAAAGATAAAAGAAGTAATAAAGCTGTAATTACTACAGATCATACAAATAGAGGTATTCGATCAAAAGTAATTCCTGTTGATCGTATATTAATTACAGTTGTAATAAAATTTACAGCTCCTAAAATAGATGAAATTCCAGCTAAATGAAGAGAAAAAATTGCTAAATCAACAGAAGCTCCTCCATGAGCAATATTTGAAGATAACGGAGGGTAAACAGTTCATCCTGTTCCAGCTCCGTTTTCTACTATACTACTTACTAACAATAAAGTTAATGCAGGAGGTAAAAGTCAAAAACTTAT…
Run 3, Sample 36	BR2 + BF3	CTmin	-5.81	4.8	Animalia	Arthropoda	Insecta	Diptera	Scathophagidae		Scathophagidae sp.	AATTGGGAACTTCTCCTCCTCCCTGCTGGGTCAAAAAATGATGTATTAAGGATTTCGGATCAGTTAATAATATAGTAATAGCTCCAGCTAATACTGGTAAAGATAAAAGAAGTAATAAAGCTGTAATTACTACAGATCATACAAATAGAGGTATTCGATCAAAAGTAATTCCTGTTGATCGTATATTAATTACAGTTGTAATAAAATTTACAGCTCCTAAAATAGATGAAATTCCAGCTAAATGAAGAGAAAAAATTGCTAAATCAACAGAAGCTCCTCCATGAGCAATATTTGAAGATAACGGAGGGTAAACAGTTCATCCTGTTCCAGCTCCGTTTTCTACTATACTACTTACTAACAATAAAGTTAATGCAGGAGGTAAAAGTCAAAAACTTATAT…
Run 5, Sample 50	LCO1490 + HCO2198	CTmax	37.96	6	Animalia	Arthropoda	Insecta	Diptera	Scathophagidae		Scathophagidae sp.	TGTTGAATTAGAATAGGATCTCCTCCTCCAGCAGGGTCAAAGAATGAAGTATTAAGGTTTCGATCAGTTAATAATATAGTAATAGCTCCTGCTAAAACTGGTAAAGATAAAAGAAGTAATAAAGCTGTAATTACTACAGATCATACAAATAAAGGTATTCGGTCAAAAGTAATTCCTGTTGATCGTATATTGATTACTGTTGTAATAAAATTAACAGCTCCTAAAATAGATGAAATTCCTGCTAAATGAAGAGAGAAAATTGCTAAATCAACAGAAGCTCCACCATGAGCGATATTTGAAGATAAAGGAGGGTAAACAGTTCATCCTGTTCCAGCTCCGTTTTCTACTATACTACTTACTAATAATAGAGTTAATGCTGGGGGTAAAAGTCAAAAACTT…
Run 6, Sample 81	LCO1490 + HCO2198	CTmax	37.16	2	Animalia	Arthropoda	Insecta	Diptera	Sciaridea		Sciaridae sp.	AAAAAATGGGGGTCTCCTCCTCCTGCAGGGTCAAAAAAAGATGTATTTAAATTTCGATCTGTTAAAAGTATAGTGATAGCTCCTGCTAGAACAGGTAAAGATAATAGTAGTAAAATAGCAGTAATTAATACTGATCAGATGAATAAAGGTATTTTATCAAATGATATTCCTGGTGCTCGTATATTAATAATAGTAGAAATAAAATTTACAGCACCTAGGATTGAAGAAATTCCAGCTAAATGTAAAGAAAAAATTGATAAATCAACGGAAGCTCCTGAGTGGGATAATGTAGACGACAAGGGGGGGTAAACTGTTCATCCTGTTCCTGTTCCTCTTTCTACTAAACTTCTAGTTAATAAAAGAGTTAGAGATGGGGGTAAAAGTCAAAAACTTATATTA…	97.20 %
Run 4, Sample 53	LCO1490 + HCO2198	CTmin		3	Animalia	Arthropoda	Insecta	Diptera	Simuliidae	Simulium	Simulium sp.	AAAAAATGTTGGGATAAATAGGGGTCTCCTCCTCCTGCAGGGTCAAAAAAAGAAGTATTTAAATTTCGGTCTGTCAATAATATTGTAATAGCTCCTGCTAATACTGGTAAAGATAAAAGTAATAAAATTGCTGTAATAACTACAGATCATACAAATAATGGTATTCGGTCAAAAGTAATTCCATTTGATCGTATATTAATAATTGTTGTAATAAAATTTACAGCTCCTAAAATTGATGAAATTCCGGCTAAATGAAGTGAAAAAATAGCTAAATCTACAGAAGCTCCGGCATGAGCAATTCCTGAAGATAAAGGAGGGTAAACAGTTCAACCTGTTCCAGCCCCTGCTTCTACTATACTGCTAGCTAATAATAATGTTAAAGAGGGTGGTAATATTCAA…
Run 6, Sample 25	LCO1490 + HCO2198	CTmax	42.33	2.7	Animalia	Arthropoda	Insecta	Diptera	Simuliidae	Simulium	Simulium sp.	GTTAAAATAGGGGTCTCCTCCTCCTGCAGGGTCAAAAAAAGAAGTATTTAAATTTCGGTCTGTCAATAATATTGTAATAGCTCCTGCTAATACTGGTAAAGATAAAAGTAATAAAATTGCTGTAATAACTACAGATCATACAAATAATGGTATTCGGTCAAAAGTAATTCCATTTGATCGTATATTAATAATTGTTGTAATAAAATTTACAGCTCCTAAAATTGATGAAATTCCGGCTAAATGAAGTGAAAAAATAGCTAAATCTACAGAAGCTCCGGCATGAGCAATTCCTGAAGATAAAGGAGGGTAAACAGTTCAACCTGTTCCAGCCCCTGCTTCTACTATACTGCTAGCTAATAATAATGTTAAAGAGGGTGGTAATATTCAAAAACTTATATT…
Run 6, Sample 26	LCO1490 + HCO2198	CTmax	42.33	3	Animalia	Arthropoda	Insecta	Diptera	Simuliidae	Simulium	Simulium sp.	AAAAAAGGTTGGTATAATAGGGGTCTCCTCCTCCTGCAGGGTCAAAAAAAGAAGTATTTAAATTTCGGTCTGTCAATAATATTGTAATAGCTCCTGCTAATACTGGTAAAGATAAAAGTAATAAAATTGCTGTAATAACTACAGATCATACAAATAATGGTATTCGGTCAAAAGTAATTCCATTTGATCGTATATTAATAATTGTTGTAATAAAATTTACAGCTCCTAAAATTGATGAAATTCCGGCTAAATGAAGTGAAAAAATAGCTAAATCTACAGAAGCTCCGGCATGAGCAATTCCTGAAGATAAAGGAGGGTAAACAGTTCAACCTGTTCCAGCCCCTGCTTCTACTATACTGCTAGCTAATAATAATGTTAAAGAGGGTGGTAATATTCAAA…
Run 6, Sample 51	LCO1490 + HCO2198	CTmax	40.82	2.5	Animalia	Arthropoda	Insecta	Diptera	Simuliidae	Simulium	Simulium sp.	AGGTTGGTTAAATAGGGGTCTCCTCCTCCTGCAGGGTCAAAAAAAGAAGTATTTAAATTTCGGTCTGTCAATAATATTGTAATAGCTCCTGCTAATACTGGTAAAGATAAAAGTAATAAAATTGCTGTAATAACTACAGATCATACAAATAATGGTATTCGGTCAAAAGTAATTCCATTTGATCGTATATTAATAATTGTTGTAATAAAATTTACAGCTCCTAAAATTGATGAAATTCCGGCTAAATGAAGTGAAAAAATAGCTAAATCTACAGAAGCTCCGGCATGAGCAATTCCTGAAGATAAAGGAGGGTAAACAGTTCAACCTGTTCCAGCCCCTGCTTCTACTATACTGCTAGCTAATAATAATGTTAAAGAGGGTGGTAATATTCAAAAACTT…
Run 6, Sample 66	LCO1490 + HCO2198	CTmax	42.96	2.9	Animalia	Arthropoda	Insecta	Diptera	Simuliidae	Simulium	Simulium sp.	GTGGGTATAAATAGGGGTCTCCTCCTCCTGCAGGGTCAAAAAAAGAAGTATTTAAATTTCGGTCTGTCAATAATATTGTAATAGCTCCTGCTAATACTGGTAAAGATAAAAGTAATAAAATTGCTGTAATAACTACAGATCATACAAATAATGGTATTCGGTCAAAAGTAATTCCATTTGATCGTATATTAATAATTGTTGTAATAAAATTTACAGCTCCTAAAATTGATGAAATTCCGGCTAAATGAAGTGAAAAAATAGCTAAATCTACAGAAGCTCCGGCATGAGCAATTCCTGAAGATAAAGGAGGGTAAACAGTTCAACCTGTTCCAGCCCCTGCTTCTACTATACTGCTAGCTAATAATAATGTTAAAGAGGGTGGTAATATTCAAAAACTTA…
Run 6, Sample 75	LCO1490 + HCO2198	CTmax	41.25	2.6	Animalia	Arthropoda	Insecta	Diptera	Simuliidae	Simulium	Simulium sp.	GGGTTAAATAGGGGTCTCCTCCTCCTGCAGGGTCAAAAAAAGAAGTATTTAAATTTCGGTCTGTCAATAATATTGTAATAGCTCCTGCTAATACTGGTAAAGATAAAAGTAATAAAATTGCTGTAATAACTACAGATCATACAAATAATGGTATTCGGTCAAAAGTAATTCCATTTGATCGTATATTAATAATTGTTGTAATAAAATTTACAGCTCCTAAAATTGATGAAATTCCGGCTAAATGAAGTGAAAAAATAGCTAAATCTACAGAAGCTCCGGCATGAGCAATTCCTGAAGATAAAGGAGGGTAAACAGTTCAACCTGTTCCAGCCCCTGCTTCTACTATACTGCTAGCTAATAATAATGTTAAAGAGGGTGGTAATATTCAAAAACTTATAT…
Run 1, Sample 34	LCO1490 + HCO2198	CTmax	41.77	2.3	Animalia	Arthropoda	Insecta	Diptera	Simuliidae	Simulium	Simulium vittatum	AGGTGGGTTAAATAGGGGTCTCCTCCTCCTGCAGGGTCAAAAAAAGAAGTATTTAAATTTCGGTCTGTCAATAATATTGTAATAGCTCCTGCTAATACTGGTAAAGATAAAAGTAATAAAATTGCTGTAATAACTACAGATCATACAAATAATGGTATTCGGTCAAAAGTAATTCCATTTGATCGTATATTAATAATTGTTGTAATAAAATTTACAGCTCCTAAAATTGATGAAATTCCGGCTAAATGAAGTGAAAAAATAGCTAAATCTACAGAAGCTCCGGCATGAGCAATTCCTGAAGATAAAGGAGGGTAAACAGTTCAACCTGTTCCAGCCCCTGCTTCTACTATACTGCTAGCTAATAATAATGTTAAAGAGGGTGGTAATATTCAAAAACTT…
Run 6, Sample 23	LCO1490 + HCO2198	CTmax	42.28	2.8	Animalia	Arthropoda	Insecta	Diptera	Simuliidae	Simulium	Simulium vittatum	AGGTTGGGTAAAATAGGGGTCTCCTCCTCCTGCAGGGTCAAAAAAAGAAGTATTTAAATTTCGGTCTGTCAATAATATTGTAATAGCTCCTGCTAATACTGGTAAAGATAAAAGTAATAAAATTGCTGTAATAACTACAGATCATACAAATAATGGTATTCGGTCAAAAGTAATTCCATTTGATCGTATATTAATAATTGTTGTAATAAAATTTACAGCTCCTAAAATTGATGAAATTCCGGCTAAATGAAGTGAAAAAATAGCTAAATCTACAGAAGCTCCGGCATGAGCAATTCCTGAAGATAAAGGAGGGTAAACAGTTCAACCTGTTCCAGCCCCTGCTTCTACTATACTGCTAGCTAATAATAATGTTAAAGAGGGTGGTAATATTCAAAAACT…
Run 1, Sample 62	BR2 + BF3	CTmax	37.02	2.1	Animalia	Arthropoda	Insecta	Diptera	Sciaridae		Sciaridae sp.	TTATTAAAATAGGGTCTCCCCCTCCTGCCGGATCAAAAAATGAAGTGTTTAAATTTCGGTCTGTTAATAATATAGTAATAGCTCCAGCTAGTACAGGAAGAGATAATAATAATAAAATGGCTGTAATAAAAACTGATCATACAAATAAAGGTATTTTATCAAAAAGTATTCCTGGTCTTCGCATATTAATAATGGTTGAAATGAAATTTACTGCCCCTAAAATTGAAGAAATCCCAGCTAAATGAAGTGAAAAAATAGATAAGTCTACAGAAGCTCCCGAATGTGATAAAGTAGAAAATAGGGGGGGGTAAACTGTTCAGCCTGTCCCTGTTCCTCTTTCTACTAATCTACTCGTTAGTAATAAAGTTAGAGAAGGGGGGAGTAACCAAAAACTTATAT…	90.4 %
Run 4, Sample 78	LCO1490 + HCO2198	CTmin	-2.42	10	Animalia	Arthropoda	Insecta	Diptera	Syrphini	Spaerophoria	Sphaerophoria sp.	AAAAAGGTTGAAATTAAATTGGGGTCTCCTCCTCCAGCTGGGTCAAAGAAAGATGTATTTAAATTTCGATCTGTTAAAAGTATAGTAATTGCTCCTGCTAATACAGGTAAAGATAAAAGTAATAATAAAGCAGTAATTACTACTGATCATACAAATAAAGGTATTCGATCATATGAAATTCCATTTGATCGTATATTAATTACTGTTGTAATAAAATTTACAGCTCCTAAAATTGATGATATTCCTGCTAAATGTAATGAAAAAATTGCTAAATCTACAGAAGCTCCACCATGAGCAATTCTTGCAGAAAGAGGTGGATAAACTGTTCATCCAGTTCCTGCTCCATTTTCAACTATACTACTTACTAAAAGTAATGTTAGAGAAGGAGGTAATAATCAG…
Run 3, Sample 26	LCO1490 + HCO2198	CTmin	-3.59	5.5	Animalia	Arthropoda	Insecta	Diptera	Muscidae	Spilogona	Spilogona arctica	AATTAAATTGGGAATCCTCCTCCTCCTGCTGGGTCAAAAATGAAGTATTTAAATTTCGATCTGTTAATAATATAGTAATAGCTCCTGCTAATACAGGTAATGATAAAAGTAATAATAAAGCTGTAATAACTACTGATCAAACAAATAAAGGTATTCGGTCAAAGGTAATTCCTGTTGATCGTATATTAATTACAGTAGTAATAAAATTTACAGCTCCTAAAATAGAAGAAATTCCAGCTAAATGTAAAGAAAAAATAGCTAAATCTACAGAGGCTCCTCCATGGGCAATATTAGATGATAAAGGAGGATAAACAGTTCATCCAGTTCCAGCTCCATTTTCTACTAAACTACTTGTTAGTAATAAAATTAGAGCTGGAGGTAAAAGTCAAAAACTTATAT…
Run 3, Sample 8	BR2 + BF3	CTmin	10.15	5	Animalia	Arthropoda	Insecta	Diptera	Muscidae	Spilogona	Spilogona arctica	AAAAATAAATGGTTTGGATATAAAATTGGGATCTCCTCCTCCTGCTGGGTCAAAAATGAAGTATTTAAATTTCGATCTGTTAATAATATAGTAATAGCTCCTGCTAATACAGGTAATGATAAAAGTAATAATAAAGCTGTAATAACTACTGATCAAACAAATAAAGGTATTCGGTCAAAGGTAATTCCTGTTGATCGTATATTAATTACAGTAGTAATAAAATTTACAGCTCCTAAAATAGAAGAAATTCCAGCTAAATGTAAAGAAAAAATAGCTAAATCTACAGAGGCTCCTCCATGGGCAATATTAGATGATAAAGGAGGATAAACAGTTCATCCAGTTCCAGCTCCATTTTCTACTAAACTACTTGTTAGTAATAAAATTAGAGCTGGAGGTAAA…	97.98 %
Run 5, Sample 49	LCO1490 + HCO2198	CTmax	33.75	6	Animalia	Arthropoda	Insecta	Diptera	Muscidae	Spilogona	Spilogona arctica	AAAAAGGTTGATTAAAATTGGGATCTCCTCCTCCTGCTGGGTCAAAAATGAAGTATTTAAATTTCGATCTGTTAATAATATAGTAATAGCTCCTGCTAATACAGGTAATGATAAAAGTAATAATAAAGCTGTAATAACTACTGATCAAACAAATAAAGGTATTCGGTCAAAGGTAATTCCTGTTGATCGTATATTAATTACAGTAGTAATAAAATTTACAGCTCCTAAAATAGAAGAAATTCCAGCTAAATGTAAAGAAAAAATAGCTAAATCTACAGAGGCTCCTCCATGGGCAATATTAGATGATAAAGGAGGATAAACAGTTCATCCAGTTCCAGCTCCATTTTCTACTAAACTACTTGTTAGTAATAAAATTAGAGCTGGAGGTAAAAGTCAAAA…
Run 3, Sample 37	LCO1490 + HCO2198	CTmin	-3.82	4.2	Animalia	Arthropoda	Insecta	Diptera	Muscidae	Spilogona	Spilogona arctica	ATTAATTTGGGAATCTCCTCCTCCTGCTGGGTCAAAAATGAAGTATTTAAATTTCGATCTGTTAATAATATAGTAATAGCTCCTGCTAATACAGGTAATGATAAAAGTAATAATAAAGCTGTAATAACTACTGATCAAACAAATAAAGGTATTCGGTCAAAGGTAATTCCTGTTGATCGTATATTAATTACAGTAGTAATAAAATTTACAGCTCCTAAAATAGAAAAAATTCCAGCTAAATGTAAAGAAAAAATAGCTAAATCTACAGAGGCTCCTCCATGGGCAATATTAGATGATAAAGGAGGATAAACAGTTCATCCAGTTCCAGCTCCATTTTCTACTAAACTACTTGTTAGTAATAAAATTAGAGCTGGAGGTAAAAGTCAAAAACTTATATTA…
Run 5, Sample 26	LCO1490 + HCO2198	CTmax	40.3	6.3	Animalia	Arthropoda	Insecta	Diptera	Muscidae	Spilogona	Spilogona sp.	GTTGATATTAAATTGGGATCCCCTCCTCCTGCTGGGATCAAAAAATGAAGTATTTAAATTTCGATCTGTTAATAATATAGTAATAGCTCCAGCTAATACAGGTAATGATAAAAGTAATAGTAAAGCTGTAATTACTACTGATCAAACGAATAAAGGTATTCGATCAAAGGTAATTCCTGTTGATCGTATATTAATTACAGTAGTAATAAAATTTACAGCTCCTAAAATAGAAGAAATTCCGGCTAAATGTAAAGAAAAAATAGCTAAGTCTACAGAAGCTCCTCCATGAGCAATATTAGAAGATAAAGGAGGATAAACAGTTCAACCAGTTCCAGCTCCATTTTCCACTATACTACTTGTTAGTAGTAAAATTACAGCAGGAGGTAAAAGTCAAAATCT…
Run 5, Sample 98	LCO1490 + HCO2198	CTmax	40.52	4.3	Animalia	Arthropoda	Insecta	Diptera	Muscidae	Spilogona	Spilogona sp.	TGGGTATAAATAGGATCTCCTCCTCCTGCTGGATCAAAAATGAAGTATTTAAGTTTCGATCTGTTAATAGTATAGTAATAGCTCCAGCTAATACAGGTAATGATAATAATAATAATAAAGCTGTAATTACTACTGATCATACAAATAAAGGTATTCGGTCAAATGTAATTCCTGTTGATCGTATATTAATTACAGTAGTAATAAAATTAACAGCTCCTAAAATAGAAGAAACTCCAGCTAAATGTAAAGAAAAAATAGCTAAATCTACAGAAGCTCCTCCATGAGCAATATTAGATGATAAAGGAGGATATACAGTTCATCCAGTCCCAGCTCCGTTTTCTACTATACTGCTTGTAAGTAGTAAAATTAAAGCAGGAGGTAAAAGTCAAAATCTTATAT…
Run 1, Sample 6	LCO1490 + HCO2198	CTmax	43.86	13	Animalia	Arthropoda	Insecta	Diptera	Tachinidae	Tachina	Tachina ampliforceps	TTGATAAGAATTGGGATCTCCTCCTCCAGCGGGGTCAAAAAATCGATGTATTTAAATTTCGATCTGTTAATAATATAGTAATAGCTCCAGCTAATACTGGTAATGATAAAAGTAATAATAATGCTGTAATTACTACTGATCATACAAATAAAGGTATTCGGTCAAAAGTAATTCCTGTAGATCGTATATTAATAACTGTTGTAATAAAATTTACAGCTCCTAAAATAGAAGAAATTCCAGCTAAATGTAATGAGAAAATTGCTAAATCAACAGAAGCTCCTCCATGGGCAATATTAGAAGATAAAGGAGGGTAAACAGTTCATCCTGTTCCAGCTCCATTTTCTACTATACTACTTACAAGGAGTAAAGTTAATGCAGGAGGTAAAAGTCAAAAACTTA…
Run 6, Sample 87	LCO1490 + HCO2198	CTmax	42.99	19	Animalia	Arthropoda	Insecta	Diptera	Tachinidae	Tachina	Tachina ampliforceps	AAAAATGTTGAAAAGAATTGGGATCTCCTCCTCCAGCGGGGTCAAAAATGATGTATTTAAATTTCGATCTGTTAATAATATAGTAATAGCTCCAGCTAATACTGGTAATGATAAAAGTAATAATAATGCTGTAATTACTACTGATCATACAAATAAAGGTATTCGGTCAAAAGTAATTCCTGTAGATCGTATATTAATAACTGTTGTAATAAAATTTACAGCTCCTAAAATAGAAGAAATTCCAGCTAAATGTAATGAGAAAATTGCTAAATCAACAGAAGCTCCTCCATGGGCAATATTAGAAGATAAAGGAGGGTAAACAGTTCATCCTGTTCCAGCTCCATTTTCTACTATACTACTTACAAGGAGTAAAGTTAATGCAGGAGGTAAAAGTCAAAA…
Run 1, Sample 49	LCO1490 + HCO2198	CTmax	24.5	4.9	Animalia	Arthropoda	Insecta	Diptera	Muscidae		Muscidae sp.	GGGTGGGAAAAATTGGGATCTCCTCCTCCTGCTGGGTCAAAGAATGAAGTATTTATATTTCGATCAGTTAATAGTATAGTAATAGCTCCTGCTAATACTGGTAATGATAAAAGTAATAGTAAAGCTGTAATTACTACAGATCAAACGAATAAAGGCATACGATCAAAAGTAATTCCTGTTGATCGTATATTAATTACTGTTGTAATAAAGTTTACTGCTCCTAGAATTGAAGAAATTCCTGCTAAATGTAATGAGAAAATAGCTAAATCAACAGAAGCTCCACTATGAGCGATATTTGAAGACAAAGGAGGGTAAACGGTTCAACCTGTACCAGCTCCATTTTCTACTATACTTCTGACTAATAAAAGCGATAAAGCAGGAGGCAATAGTCAAAAACTT…
Run 4, Sample 136	LCO1490 + HCO2198	CTmin	1.26	5	Animalia	Arthropoda	Insecta	Diptera	Muscidae		Muscidae sp.	TGACCAAATGAAGTATTTATATTTCGATCAGTTAATAGTATAGTAATAGCTCCTGCTAATACTGGTAATGATAAAAGTAATAGTAAAGCTGTAATTACTACAGATCAAACGAATAAAGGCATACGATCAAAAGTAATTCCTGTTGATCGTATATTAATTACTGTTGTAATAAAGTTTACTGCTCCTAGAATTGAAGAAATTCCTGCTAAATGTAATGAGAAAATAGCTAAATCAACAGAAGCTCCACTATGAGCGATATTTGAAGACAAAGGAGGGTAAACGGTTCAACCTGTACCAGCTCCATTTTCTACTATACTTCTGACTAATAAAAGCGATAAAGCAGGAGGCAATAGTCAAAAACTTATATTATTTATTCGAGGAAATGCTATATCTGGAGCT…
Run 5, Sample 100	LCO1490 + HCO2198	CTmax	38.07	5.4	Animalia	Arthropoda	Insecta	Diptera	Muscidae		Muscidae sp.	GTGGGTTAAATTGGGATCTCCTCCTCCTGCTGGGTCAAAGAATGAAGTATTTATATTTCGATCAGTTAATAGTATAGTAATAGCTCCTGCTAATACTGGTAATGATAAAAGTAATAGTAAAGCTGTAATTACTACAGATCAAACGAATAAAGGCATACGATCAAAAGTAATTCCTGTTGATCGTATATTAATTACTGTTGTAATAAAGTTTACTGCTCCTAGAATTGAAGAAATTCCTGCTAAATGTAATGAGAAAATAGCTAAATCAACAGAAGCTCCACTATGAGCGATATTTGAAGACAAAGGAGGGTAAACGGTTCAACCTGTACCAGCTCCATTTTCTACTATACTTCTGACTAATAAAAGCGATAAAGCAGGAGGCAATAGTCAAAAACTTAT…
Run 5, Sample 118	BR2 + BF3	CTmax	38.93	4.2	Animalia	Arthropoda	Insecta	Diptera	Muscidae		Muscidae sp.	TAGTGAAGCTGTAATTACTACAGATCAAACGAATAAGGGCATACGATCAAAAGTAATTCCTGTTGATCGTATATTAATTACTGTTGTAATAAAGTTTACTGCTCCTAGAATTGAAGAAATTCCTGCTAAATGTAATGAGAAAATAGCTAAATCAACAGAAGCTCCACTATGAGCGATATTTGAAGACAAAGGAGGGTAAACGGTTCAACCTGTACCAGCTCCATTTTCTACTATACTTCTGACTAATAAAAGCGATAAAGCAGGAGGCAATAGTCAAAAACTTATATTATTTATTCGGGGAAAGGCTATGTCGGGGCAATATCAGCACCAACAGAAAATGAGACCCGTCTT
Run 5, Sample 12	LCO1490 + HCO2198	CTmax	35.44	5.4	Animalia	Arthropoda	Insecta	Diptera	Muscidae		Muscidae sp.	GTTGGTTAAATTGGGATCTCCTCCTCCTGCTGGGTCAAAGAATGAAGTATTTATATTTCGATCAGTTAATAGTATAGTAATAGCTCCTGCTAATACTGGTAATGATAAAAGTAATAGTAAAGCTGTAATTACTACAGATCAAACGAATAAAGGCATACGATCAAAAGTAATTCCTGTTGATCGTATATTAATTACTGTTGTAATAAAGTTTACTGCTCCTAGAATTGAAGAAATTCCTGCTAAATGTAATGAGAAAATAGCTAAATCAACAGAAGCTCCACTATGAGCGATATTTGAAGACAAAGGAGGGTAAACGGTTCAACCTGTACCAGCTCCATTTTCTACTATACTTCTGACTAATAAAAGCGATAAAGCAGGAGGCAATAGTCAAAAACTTAT…
Run 5, Sample 13	LCO1490 + HCO2198	CTmax	39.36	5	Animalia	Arthropoda	Insecta	Diptera	Muscidae		Muscidae sp.	GGTGGGTTAAATTGGGATCTCCTCCTCCTGCTGGGTCAAGAATGAAGTATTTATATTTCGATCAGTTAATAGTATAGTAATAGCTCCTGCTAATACTGGTAATGATAAAAGTAATAGTAAAGCTGTAATTACTACAGATCAAACGAATAAAGGCATACGATCAAAAGTAATTCCTGTTGATCGTATATTAATTACTGTTGTAATAAAGTTTACTGCTCCTAGAATTGAAGAAATTCCTGCTAAATGTAATGAGAAAATAGCTAAATCAACAGAAGCTCCACTATGAGCGATATTTGAAGACAAAGGAGGGTAAACGGTTCAACCTGTACCAGCTCCATTTTCTACTATACTTCTGACTAATAAAAGCGATAAAGCAGGAGGCAATAGTCAAAAACTTAT…
Run 5, Sample 20	LCO1490 + HCO2198	CTmax	38.71	5.2	Animalia	Arthropoda	Insecta	Diptera	Muscidae		Muscidae sp.	AAACACCTGCTGGGTCAAAAATGAAGTATTTATATTTCGATCAGTTAATAGTATAGTAATAGCTCCTGCTAATACTGGTAATGATAAAAGTAATAGTAAAGCTGTAATTACTACAGATCAAACGAATAAAGGCATACGATCAAAAGTAATTCCTGTTGATCGTATATTAATTACTGTTGTAATAAAGTTTACTGCTCCTAGAATTGAAGAAATTCCTGCTAAATGTAATGAGAAAATAGCTAAATCAACAGAAGCTCCACTATGAGCGATATTTGAAGACAAAGGAGGGTAAACGGTTCAACCTGTACCAGCTCCATTTTCTACTATACTTCTGACTAATAAAAGCGATAAAGCAGGAGGCAATAGTCAAAAACTTATATTATTTATTCGAGGAAATGC…
Run 5, Sample 31	LCO1490 + HCO2198	CTmax	39.56	4.2	Animalia	Arthropoda	Insecta	Diptera	Muscidae		Muscidae sp.	AGATTGCGATCTCCTCCTCCTGCTGGGTGACCGAATGAAGTATTTATATTTCGATCAGTTAATAGTATAGTAATAGCTCCTGCTAATACTGGTAATGATAAAAGTAATAGTAAAGCTGTAATTACTACAGATCAAACGAATAAAGGCATACGATCAAAAGTAATTCCTGTTGATCGTATATTAATTACTGTTGTAATAAAGTTTACTGCTCCTAGAATTGAAGAAATTCCTGCTAAATGTAATGAGAAAATAGCTAAATCAACAGAAGCTCCACTATGAGCGATATTTGAAGACAAAGGAGGGTAAACGGTTCAACCTGTACCAGCTCCATTTTCTACTATACTTCTGACTAATAAAAGCGATAAAGCAGGAGGCAATAGTCAAAAACTTATATTATTT…
Run 5, Sample 42	BR2 + BF3	CTmax	38.98	5	Animalia	Arthropoda	Insecta	Diptera	Muscidae		Muscidae sp.	TATCGCTCCTGCTAATACTGGTAATGATAAAAGTAATAGTAAAGCTGTAATTACTACAGATCAAACGAATAAAGGCATACGATCAAAAGTAATTCCTGTTGATCGTATATTAATTACTGTTGTAATAAAGTTTACTGCTCCTAAAATTGAAGAAATTCCTGCTAAATGTAATGAGAAAATAGCTAAATCAACAGAAGCTCCACTATGAGCGATATTTGAAGACAAAGGAGGGTAAACGGTTCAACCTGTACCAGCTCCATTTTCTACTATACTTCTGACTAATAAAAGCGATAAAGCAGGAGGCAATAGTCAAAAACTTATATTATTTATTCGGGGAAAGGCTA
Run 5, Sample 48	BR2 + BF3	CTmax	37.53	5	Animalia	Arthropoda	Insecta	Diptera	Muscidae		Muscidae sp.	TATACGATCAAAAGTAATTCCTGTTGATCGTATATTAATTACTGTTGTAATAAAGTTTACTGCTCCTAGAATTGAAGAAATTCCTGCTAAATGTAATGAGAAAATAGCTAAATCAACAGAAGCTCCACTATGAGCGATATTTGAAGACAAAGGAGGGTAAACGGTTCAACCTGTACCAGCTCCATTTTCTACTATACTTCTGACTAATAAAAGCGATAAAGCAGGAGGCAATAGTCAAAAATTTATATTATTTATTCGAGGAAAT
Run 5, Sample 8	BR2 + BF3	CTmax	38.82	5.7	Animalia	Arthropoda	Insecta	Diptera	Muscidae		Muscidae sp.	AAATAAAAATATAGTAATAGCTCCTGCTAATACTGGTAATGATAAAAGTAATAGTAAAGCTGTAATTACTACAGATCAAACGAATAAAGGCATACGATCAAAAGTAATTCCTGTTGATCGTATATTAATTACTGTTGTAATAAAGTTTACTGCTCCTAGAATTGAAGAAATTCCTGCTAAATGTAATGAGAAAATAGCTAAATCAACAGAAGCTCCACTATGAGCGATATTTGAAGACAAAGGAGGGTAAACGGTTCAACCTGTACCAGCTCCATTTTCTACTATACTTCTGACTAATAAAAGCGATAAAGCAGGAGGCAATAGTCAAAAACTTATATTATTTATTCGGGGAAAGGCTATGTCGGGGCAATATCAGCACCAAACAGAAAA
Run 6, Sample 24	LCO1490 + HCO2198	CTmax		4.7	Animalia	Arthropoda	Insecta	Diptera	Muscidae		Muscidae sp.	AAATTGGGATCTCCTTCCCTCCTGTCTGGGTCAAAAATGAAGTATTTATATTTCGATCAGTTAATAGTATAGTAATAGCTCCTGCTAATACTGGTAATGATAAAAGTAATAGTAAAGCTGTAATTACTACAGATCAAACGAATAAGGGCATACGATCAAAAGTAATTCCTGTTGATCGTATATTAATTACTGTTGTAATAAAGTTTACTGCTCCTAGAATTGAAGAAATTCCTGCTAAATGTAATGAGAAAATAGCTAAATCAACAGAAGCTCCACTATGAGCGATATTTGAAGACAAAGGAGGGTAAACGGTTCAACCTGTACCAGCTCCATTTTCTACTATACTTCTGACTAATAAAAGCGATAAAGCAGGAGGCAATAGTCAAAAACTTATATTAT…
Run 4, Sample 38	LCO1490 + HCO2198	CTmin	-1.47	6	Animalia	Arthropoda	Insecta	Diptera	Muscidae		Muscidae sp.	AAAAATTGGGATCCTCCTCCTCCTGCAGGGTCAAAGAATGAAGTATTTATATTTCGATCTGTTAATAATATAGTGATAGCTCCTGCTAATACTGGTAATGATAAAAGTAATAATAAAGCAGTAATTACTACAGATCAAACAAATAAAGGTATACGATCAAATGTAATTCCTGTTGATCGTATATTAATTACTGTTGTAATAAAATTTACTGCTCCTAAAATTGAAGAAATTCCTGCTAAATGTAATGAGAAAATAGCTAAATCAACAGAAGCTCCACTATGGGCAATATTAGAAGATAAAGGAGGATAAACAGTTCAACCTGTACCAGCTCCGTTTTCCACTATACTACTGACTAGTAAAAGTGTTAAAGCAGGAGGTAATAATCAAAAACTTATATTA…	0.9767
Run 5, Sample 106	LCO1490 + HCO2198	CTmax	37.89	6.1	Animalia	Arthropoda	Insecta	Diptera	Muscidae		Muscidae sp.	AAAATGTTGAATTAAATTGGGATCTCCTCCTCCTGCAGGGTCAAAGAATGAAGTATTTATATTTCGATCTGTTAATAATATAGTGATAGCTCCTGCTAATACTGGTAATGATAAAAGTAATAATAAAGCAGTAATTACTACAGATCAAACAAATAAAGGTATACGATCAAATGTAATTCCTGTTGATCGTATATTAATTACTGTTGTAATAAAATTTACTGCTCCTAAAATTGAAGAAATTCCTGCTAAATGTAATGAGAAAATAGCTAAATCAACAGAAGCTCCACTATGGGCAATATTAGAAGATAAAGGAGGATAAACAGTTCAACCTGTACCAGCTCCGTTTTCCACTATACTACTGACTAGTAAAAGTGTTAAAGCAGGAGGTAATAATCAAAA…	0.9755
Run 4, Sample 101	LCO1490 + HCO2198	CTmin		4	Animalia	Arthropoda	Insecta	Diptera	Mycetophilidae	Trichonta	Trichonta sp.	ATGTTGAATTAAATAGGATCTCCTCCTCCAGAAGGGTCAAAAAATGAAGTATTTAAATTTCGATCTGTTAAAAGTATGGTAATAGCACCTGCTAATACAGGTAAAGATAATAATAATAATACTGCTGTAATTAAAACAGATCATACAAATAAAGGTAAACTATCAAAAGATATACCGGGGGCACGTATATTAATGATAGTTGTAATAAAATTTACTGCTCCTAAAATAGAAGAAATACCGGCTAAATGAAGAGAAAAAATTGCTAAATCTACAGATGAGCCGGCATGTGCAATTGTTGAAGAAAGTGGTGGATAAACTGTCCAACCTGTACCTGCTCCTGCTTCCACTAAACTTCTAGAAAGTAATAATGTTAGTGAAGGGGGTAAAAGTCAAAAACTT…
Run 4, Sample 79	LCO1490 + HCO2198	CTmin	-5.52	1.5	Animalia	Arthropoda	Collembola	Entomobryomorpha	Entomobryidae	Lepidocyrtus	Lepidocyrtus sp.	TCCGGACAATAATAGGGTTAAAGATGGGGGGAGAAGTCAAAAGCTTATGTTGTTTATACGAGGAAAGGCTATATCGGGGGCCCCGATTATTAACGGCACTAATCAATTACCAAACCCCCCGATTATAATGGGTATAACCATAAAAAAAATTATAATAAAAGCATGAGCAGTTACCATAACGTTATAGATTTGATCGTCTCCAATGAATCTTCCTGGTTGACCTAATTCTAGGCGGATTAGCACACTAAAAGCAGTACCAACTATTGCTGATCATGTTCCAAAAATTAAGTATAGTGTTCCAATATCTTTTATGTTTTGGT	97.91 %
Run 6, Sample 11	LCO1490 + HCO2198	CTmax	40.16	1.3	Animalia	Arthropoda	Insecta	Hemiptera	Aphididae	Cavariella	Cavariella sp.	AAAAATGTTGGTAAAATTGGGATCACCTCCCTCCGGGCTGGGATCAAAAATGATGTATTTAAATTTCGATCAGTTAATAATATTGTGATAGCTCCTGCTAAAACAGGTAATGACAAGATTAATAAAATAGCTGTAATTAAAATTGATCATGGGAATAATGGAATTTGATTAAGTTTTATATTGTAAGGTATTATATTTAAAATAGTACAAATAAAATTAATTGCTCCTAAAATTGATGAGATTCCTGCTAAATGTAATGAAAAAATAGTTAAATCAACTGAAATATTATTATGTGCAATATTATTAGATAATGGGGGGTAAATAGTTCATCCTGTTCCTGTTCCATTATTAATTAAAAAACTACAAATTATTATTATTAATGAAGGTGGTAATAATCAA…
Run 6, Sample 43	LCO1490 + HCO2198	CTmax	40.33	1.7	Animalia	Arthropoda	Insecta	Hemiptera	Aphididae	Cavariella	Cavariella sp.	TGGGTTAAAATTGGGATCACCCTCCCTCCGGCTGGATCAAAAATGATGTATTTAAATTTCGATCAGTTAATAATATTGTGATAGCTCCTGCTAAAACAGGTAATGACAAGATTAATAAAATAGCTGTAATTAAAATTGATCATGGGAATAATGGAATTTGATTAAGTTTTATATTGTAAGGTATTATATTTAAAATAGTACAAATAAAATTAATTGCTCCTAAAATTGATGAGATTCCTGCTAAATGTAATGAAAAAATAGTTAAATCAACTGAAATATTATTATGTGCAATATTATTAGATAATGGGGGGTAAATAGTTCATCCTGTTCCTGTTCCATTATTAATTAAAAAACTACAAATTATTATTATTAATGAAGGTGGTAATAATCAAAAACTAA…	94.77 %
Run 6, Sample 32	LCO1490 + HCO2198	CTmax	40.42	1.9	Animalia	Arthropoda	Insecta	Hemiptera	Aphididae	Cavariella	Cavariella sp.	GTTGGTAAAATTGGGATCACCTCCTCCGGCTGGATCAAAAATGATGTATTTAAATTTCGATCAGTTAATAATATTGTGATAGCTCCTGCTAAAACAGGTAATGACAAGATTAATAAAATAGCTGTAATTAAAATTGATCATGGGAATAATGGAATTTGATTAAGTTTTATATTGTAAGGTATTATATTTAAAATAGTACAAATAAAATTAATTGCTCCTAAAATTGATGAGATTCCTGCTAAATGTAATGAAAAAATAGTTAAATCAACTGAAATATTATTATGTGCAATATTATTAGATAATGGGGGGTAAATAGTTCATCCTGTTCCTGTTCCATTATTAATTAAAAAACTACAAATTATTATTATTAATGAAGGTGGTAATAATCAAAAACTAATA…
Run 6, Sample 42	LCO1490 + HCO2198	CTmax	40.33	1.3	Animalia	Arthropoda	Insecta	Hemiptera	Aphididae	Cavariella	Cavariella sp.	AAAAATGTTGGTTAAATTGGGATCACCTCCTCCGGCTGGATCAAAAATGATGTATTTAAATTTCGATCAGTTAATAATATTGTGATAGCTCCTGCTAAAACAGGTAATGACAAGATTAATAAAATAGCTGTAATTAAAATTGATCATGGGAATAATGGAATTTGATTAAGTTTTATATTGTAAGGTATTATATTTAAAATAGTACAAATAAAATTAATTGCTCCTAAAATTGATGAGATTCCTGCTAAATGTAATGAAAAAATAGTTAAATCAACTGAAATATTATTATGTGCAATATTATAAGATAATGGGGGGTAAATAGTTCATCCGGTTCCTGTTCCGTTATTAATTAAAAAACTACAAATTATTATTATTAATGAAGGGGGTAATAATCAAAAA…	94.03 %
Run 3, Sample 74	LCO1490 + HCO2198	CTmin	-4.07	3.2	Animalia	Arthropoda	Insecta	Hemiptera	Aphididae	Euceraphis	Euceraphis punctipennis	TAAGGAATTGGGTCTCCTCCTCCAGAATGGATCAAAAAAAGAAGTATTTAAATTTCGATCGGTTAATAGTATTGTAATTGCTCCAGCTAAAACTGGTAAAGATAAAATTAATAGAATAGCTGTGATTAAAATTGATCAGGGAAATAAAGGAATTTGATTTATTTTTATGTTATTGGGTATTATATTTAAAATTGTACAAATAAAATTAATTGCTCCTAAAATGGAAGAGATTCCTGCAAGGTGTAAAGAAAAAATTGTTAAGTCTACTGAAATATTATTATGTGCAATATTATTTGAAAGAGGGGGGTAAATAGTTCAACCTGTTCCTGTTCCATTATTAATTAGAAAACTACTAATTATTATTATTAAAGAAGGGGGTAGAAGTCAAAATCTAATATT…
Run 3, Sample 90	LCO1490 + HCO2198	CTmin	-2.9	2.8	Animalia	Arthropoda	Insecta	Hemiptera	Aphididae	Euceraphis	Euceraphis punctipennis	GAAGAATTGGGGTCTCCTCCTCCGGATGGGGTCAAAAAAGAAGTATTTAAATTTCGATCAGTTAATAATATTGTAATTGCTCCAGCTAAAACTGGTAAAGATAAAATTAATAGAATAGCTGTAATTAAAATTGATCAGGGAAACAAAGGAATTTGATTTATTTTTATGTTATTGGGCATTATATTTAAAATTGTACAAATGAAATTAATTGCTCCTAAAATGGAAGAGATTCCTGCAAGGTGTAAACAAAAAATTGTTAAATCTACTGAAATATTATTATGTGCGATATTATTTGAAAGAGGGGGGTAAATAGTTCAACCTGTTCCTGTTCCATTATTAATTAGGAATCTACTAATTATTATTATTAAAGAAGGAGGTAGAAGCCAAAATCTAATATTA…	96.58 %
Run 4, Sample 107	LCO1490 + HCO2198	CTmin	-2.68	2.2	Animalia	Arthropoda	Insecta	Hemiptera	Aphididae	Euceraphis	Euceraphis punctipennis	GAATGGGTCAAAAAAAGAAGTATTTAAATTTCGATCAGTTAATAATATTGTAATTGCTCCAGCTAAAACTGGTAAAGATAAAATTAATAGAATAGCTGTAATTAAAATTGATCAGGGAAACAAAGGAATTTGATTTATTTTTATGTTATTGGGCATTAAATTTAAAATTGTACAAATGAAATTAATTGCTCCTAAAATGGAAGAGATTCCTGCAAGGTGTAAACAAAAAATTGTTAAATCTACTGAAATATTATTATGTGCGATATTATTTGAAAGAGGGGGGTAAATAGTTCAACCTGTTCCTGTTCCATTATTAATTAGGAATCTACTAATTATTATTATTAAAGAAGGAGGTAGAAGCCAAAATCTAATATTATTTAATCGTGGAAATGATATATC…	only 97%
Run 4, Sample 13	LCO1490 + HCO2198	CTmin	-2.76	3.7	Animalia	Arthropoda	Insecta	Hemiptera	Aphididae	Euceraphis	Euceraphis punctipennis	GAATTGGGGTCTCCTCCTCCAGAATGGGATCAAAAAAAGAAGTATTTAAATTTCGATCGGTTAATAATATTGTAATTGCTCCAGCTAAAACTGGTAAAGATAAAATTAATAGAATAGCTGTGATTAAAATTGATCAGGGAAACAAAGGAATTTGATTTATTTTTATGTTATTGGGCATTATATTTAAAATTGTACAAATGAAATTAATTGCTCCTAAAATGGAAGAGATTCCTGCAAGGTGTAAACAAAAAATTGTTAAGTCTACTGAAATATTATTATGTGCAATATTATTTGAAAGAGGGGGGTAAATAGTTCAACCTGTTCCTGTTCCATTATTAATTAGAAAACTACTAATTATTATTATTAAAGAAGGAGGTAGAAGTCAAAATCTAATATTAT…
Run 4, Sample 20	BR2 + BF3	CTmin	-3.91	2.5	Animalia	Arthropoda	Insecta	Hemiptera	Aphididae	Euceraphis	Euceraphis punctipennis	GGTTTGGAAAAAGGGAATTGGGGTTCTCCTCCCTCCAGGATGAGATCAAAAAAGGAAGTATTTAAATTTCGATCGGTTAATAGTATTGTAATTGCTCCAGCTAAAACTGGTAAAGATAAAATTAATAGAATAGCTGTGATTAAAATTGATCAGGGAAATAAAGGAATTTGATTTATTTTTATGTTATTGGGTATTATATTTAAAATTGTACAAATAAAATTAATTGCTCCTAAAATGGAAGAGATTCCTGCAAGGTGTAAAGAAAAAATTGTTAAGTCTACTGAAATATTATTATGTGCAATATTATTTGAAAGAGGGGGATAAATAGTTCAACCTGTTCCTGTTCCATTATTAATTAGAAAACTACTAATTATTATTATTAAAGAAGGGGGTAGAAGT…
Run 4, Sample 26	LCO1490 + HCO2198	CTmin	-4.1	2.8	Animalia	Arthropoda	Insecta	Hemiptera	Aphididae	Euceraphis	Euceraphis punctipennis	GGAATGGGGTCAAAAAAGAAGTATTTAAATTTCGATCAGTTAATAATATTGTAATTGCTCCAGCTAAAACTGGTAAAGATAAAATTAATAGAATAGCTGTGATTAAAATTGATCAGGGAAACAAAGGAATTTGATTTATTTTTATGTTATTGGGCATTATATTTAAAATTGTACAAATGAAATTAATTGCTCCTAAAATGGAAGAGATTCCTGCAAGGTGTAAACAAAAAATTGTTAAATCTACTGAAATATTATTATGTGCAATATTATTTGAAAGAGGGGGGTAAATAGTTCAACCTGTTCCTGTTCCATTATTAATTAGGAATCTACTAATTATTATTATTAAAGAAGGAGGTAGAAGCCAAAATCTAATATTATTTAATCGTGGAAATGATATAT…
Run 4, Sample 96	LCO1490 + HCO2198	CTmin	2.05	2.5	Animalia	Arthropoda	Insecta	Hemiptera	Aphididae	Euceraphis	Euceraphis punctipennis	AGAAGAATTGGGGTCTCCTCCTCCGGATGGGTCAAAAAAAGAAGTATTTAAATTTCGATCAGTTAATAATATTGTAATTGCTCCAGCTAAAACTGGTAAAGATAAAATTAATAGAATAGCTGTAATTAAAATTGATCAGGGAAACAAAGGAATTTGATTTATTTTTATGTTATTGGGCATTATATTTAAAATTGTACAAATGAAATTAATTGCTCCTAAAATGGAAGAGATTCCTGCAAGGTGTAAACAAAAAATTGTTAAATCTACTGAAATATTATTATGTGCGATATTATTTGAAAGAGGGGGGTAAATAGTTCAACCTGTTCCTGTTCCATTATTAATTAGGAATCTACTAATTATTATTATTAAAGAAGGAGGTAGAAGCCAAAATCTAATATT…
Run 5, Sample 11	LCO1490 + HCO2198	CTmax	40.96	3	Animalia	Arthropoda	Insecta	Hemiptera	Aphididae	Euceraphis	Euceraphis punctipennis	TAAAGGAATTGGGGTCTCCTCCCTCCAGATGGGATCAAAAAAAGAAGTATTTAAATTTCGATCGGTTAATAGTATTGTAATTGCTCCAGCTAAAACTGGTAAAGATAAAATTAATAGAATAGCTGTGATTAAAATTGATCAGGGAAATAAAGGAATTTGATTTATTTTTATGTTATTGGGTATTATATTTAAAATTGTACAAATAAAATTAATTGCTCCTAAAATGGAAGAGATTCCTGCAAGGTGTAAAGAAAAAATTGTTAAGTCTACTGAAATATTATTATGTGCAATATTATTTGAAAGAGGGGGGTAAATAGTTCAACCTGTTCCTGTTCCATTATTAATTAGAAAACTACTAATTATTATTATTAAAGAAGGGGGTAGAAGTCAAAATCTAAT…
Run 3, Sample 89	LCO1490 + HCO2198	CTmin	-2.89	3.9	Animalia	Arthropoda	Insecta	Hemiptera	Aphididae	Euceraphis	Euceraphis sp.	AAGGAATTGGGGTCTCCTCCTCCAGGAATGGATCAAAAAAAGAAGTATTTAAATTTCGATCGGTTAATAGTATTGTAATTGCTCCAGCTAAAACTGGTAAAGATAAAATTAATAGGAATAGCTGTGATTAAAATTGATCAGGGAAATAAAGGATTTTGATTTATTTTTATGTTATTGGGTATTAAATTTAAAATTGTGCAA	0.96
Run 4, Sample 110	BR2 + BF3	CTmin	-2.64	1.7	Animalia	Arthropoda	Insecta	Hemiptera	Aphididae	Myzodium	Myzodium modestum	AGGGAAACTTCCTCCTCCTGCTGGGATCAAAAAATGAAGGTATTTAAATTACGATCAGTTAATAATATAGTAATAGCTCCAGCTAAAACTGGTAGAGATAAAATTAATAAAATAGCTGTAATTAAAATTGATCAAGGGAAAAGAGGGATTTGATTTAATTTTATGTTATTTGGTATTATGTTTAGGATTGTACAAATAAAATTGATTGCTCCTAAAATTGATGAGATTCCTGCTAAATGTAAAGAAAAGATAGTTAAATCAACTGAGATATTATTATGTGCAATATTATTTGATAAGGGTGGATAAATAGTTCATCCTGTTCCTGTACCATTATTAATTAAAAAACTACAAATTATTATTATTAATGATGGTGGTAATAGTCAAAATCTAATATTATTT…
Run 1, Sample 3	NA	CTmax	44.23		Animalia	Arthropoda	Insecta	Hemiptera	Nabidae	Nabis	Nabis flavomarginatus		Taxonomy determined visually
Run 1, Sample 40	NA	CTmax	40.83		Animalia	Arthropoda	Insecta	Hemiptera	Nabidae	Nabis	Nabis flavomarginatus		Taxonomy determined visually
Run 1, Sample 41	NA	CTmax	45		Animalia	Arthropoda	Insecta	Hemiptera	Nabidae	Nabis	Nabis flavomarginatus		Taxonomy determined visually
Run 1, Sample 80	NA	CTmax	45.07		Animalia	Arthropoda	Insecta	Hemiptera	Nabidae	Nabis	Nabis flavomarginatus		Taxonomy determined visually
Run 2, Sample 1	NA	CTmin	-4.63		Animalia	Arthropoda	Insecta	Hemiptera	Nabidae	Nabis	Nabis flavomarginatus		Taxonomy determined visually
Run 2, Sample 111	NA	CTmin	-3.31		Animalia	Arthropoda	Insecta	Hemiptera	Nabidae	Nabis	Nabis flavomarginatus		Taxonomy determined visually
Run 2, Sample 2	NA	CTmin	6.66		Animalia	Arthropoda	Insecta	Hemiptera	Nabidae	Nabis	Nabis flavomarginatus		Taxonomy determined visually
Run 2, Sample 20	NA	CTmin	-4.7		Animalia	Arthropoda	Insecta	Hemiptera	Nabidae	Nabis	Nabis flavomarginatus		Taxonomy determined visually
Run 2, Sample 22	NA	CTmin	-4.7		Animalia	Arthropoda	Insecta	Hemiptera	Nabidae	Nabis	Nabis flavomarginatus		Taxonomy determined visually
Run 2, Sample 26	NA	CTmin	-4.62		Animalia	Arthropoda	Insecta	Hemiptera	Nabidae	Nabis	Nabis flavomarginatus		Taxonomy determined visually
Run 2, Sample 27	NA	CTmin	-4.74		Animalia	Arthropoda	Insecta	Hemiptera	Nabidae	Nabis	Nabis flavomarginatus		Taxonomy determined visually
Run 2, Sample 39	NA	CTmin	-4.75		Animalia	Arthropoda	Insecta	Hemiptera	Nabidae	Nabis	Nabis flavomarginatus		Taxonomy determined visually
Run 2, Sample 43	NA	CTmin	-4.19		Animalia	Arthropoda	Insecta	Hemiptera	Nabidae	Nabis	Nabis flavomarginatus		Taxonomy determined visually
Run 2, Sample 44	NA	CTmin	-4.22		Animalia	Arthropoda	Insecta	Hemiptera	Nabidae	Nabis	Nabis flavomarginatus		Taxonomy determined visually
Run 2, Sample 52	NA	CTmin	-4.73		Animalia	Arthropoda	Insecta	Hemiptera	Nabidae	Nabis	Nabis flavomarginatus		Taxonomy determined visually
Run 2, Sample 8	NA	CTmin	-4.68		Animalia	Arthropoda	Insecta	Hemiptera	Nabidae	Nabis	Nabis flavomarginatus		Taxonomy determined visually
Run 2, Sample 95	NA	CTmin	-4.73		Animalia	Arthropoda	Insecta	Hemiptera	Nabidae	Nabis	Nabis flavomarginatus		Taxonomy determined visually
Run 3, Sample 101	NA	CTmin	-5.12		Animalia	Arthropoda	Insecta	Hemiptera	Nabidae	Nabis	Nabis flavomarginatus		Taxonomy determined visually
Run 3, Sample 105	NA	CTmin	-5.67		Animalia	Arthropoda	Insecta	Hemiptera	Nabidae	Nabis	Nabis flavomarginatus		Taxonomy determined visually
Run 3, Sample 106	NA	CTmin	-5.02		Animalia	Arthropoda	Insecta	Hemiptera	Nabidae	Nabis	Nabis flavomarginatus		Taxonomy determined visually
Run 3, Sample 118	NA	CTmin	-6.06		Animalia	Arthropoda	Insecta	Hemiptera	Nabidae	Nabis	Nabis flavomarginatus		Taxonomy determined visually
Run 3, Sample 58	NA	CTmin	-5.07		Animalia	Arthropoda	Insecta	Hemiptera	Nabidae	Nabis	Nabis flavomarginatus		Taxonomy determined visually
Run 3, Sample 59	NA	CTmin	-5.11		Animalia	Arthropoda	Insecta	Hemiptera	Nabidae	Nabis	Nabis flavomarginatus		Taxonomy determined visually
Run 3, Sample 98	NA	CTmin	-5.94		Animalia	Arthropoda	Insecta	Hemiptera	Nabidae	Nabis	Nabis flavomarginatus		Taxonomy determined visually
Run 4, Sample 118	NA	CTmin	-5.56	7	Animalia	Arthropoda	Insecta	Hemiptera	Nabidae	Nabis	Nabis flavomarginatus		Taxonomy determined visually
Run 4, Sample 124	NA	CTmin	-5.82	7.5	Animalia	Arthropoda	Insecta	Hemiptera	Nabidae	Nabis	Nabis flavomarginatus		Taxonomy determined visually
Run 4, Sample 129	NA	CTmin	-4.31	7.7	Animalia	Arthropoda	Insecta	Hemiptera	Nabidae	Nabis	Nabis flavomarginatus		Taxonomy determined visually
Run 4, Sample 132	NA	CTmin	-3.26	6.9	Animalia	Arthropoda	Insecta	Hemiptera	Nabidae	Nabis	Nabis flavomarginatus		Taxonomy determined visually
Run 4, Sample 14	NA	CTmin	-4.69	8	Animalia	Arthropoda	Insecta	Hemiptera	Nabidae	Nabis	Nabis flavomarginatus		Taxonomy determined visually
Run 4, Sample 27	BR2 + BF3	CTmin		6.5	Animalia	Arthropoda	Insecta	Hemiptera	Nabidae	Nabis	Nabis flavomarginatus	AAAGTTTCGATCTGTTAGTAATATAGTAATAGCTCCTGCTAGTACTGGTAGGGATAATAATAGTAGTAGTGCTGTAATACCTACAGATCATACAAATAAAGGGATTCGTTCAGGTGTTATACCTACTGGTCGTATATTAATAATAGTTGAGATAAAGTTTACTGCCCCTAGGATTGATGATACTCCTGCTAAGTGTAGACTAAAAATCGCTAAGTCTACTGATGCACCATTATGGGCTACATTTGCTGAGAGGGGTGGATATACAGTTCATCCTGTACCTACACCTTTTTCTACAATACTACTAACAATTAGAAGGGTAATAGAGGGGGGTAGTAGTCAAAATCTTATATTATTTATACGGGGAAAGGCTATGTCGGG
Run 4, Sample 30	NA	CTmin	-4.14	8	Animalia	Arthropoda	Insecta	Hemiptera	Nabidae	Nabis	Nabis flavomarginatus		Taxonomy determined visually
Run 4, Sample 69	BR2 + BF3	CTmin		7	Animalia	Arthropoda	Insecta	Hemiptera	Nabidae	Nabis	Nabis flavomarginatus	ATTAAAGGTTTCGATCTGTTAGTAATATAGTAATAGCTCCTGCTAGTACTGGTAGGGATAATAATAGTAGTAGTGCTGTAATACCTACAGATCATACAAATAAAGGGATTCGTTCAGGTGTTATACCTACTGGTCGTATATTAATAATAGTTGAGATAAAGTTTACTGCCCCTAGGATTGATGATACTCCTGCTAAGTGTAGACTAAAAATCGCTAAGTCTACTGATGCACCATTATGGGCTACATTTGCTGAGAGGGGTGGATATACAGTTCATCCTGTACCTACACCTTTTTCTACAATACTACTAACAATTAGAAGGGTAATAGAGGGGGGTAGTAGTCAAAATCTTATATTATTTATACGGGGAAAGGCTATGTCGGG
Run 4, Sample 93	NA	CTmin	-4.25	6	Animalia	Arthropoda	Insecta	Hemiptera	Nabidae	Nabis	Nabis flavomarginatus		Taxonomy determined visually
Run 5, Sample 1	NA	CTmax	46.27	8	Animalia	Arthropoda	Insecta	Hemiptera	Nabidae	Nabis	Nabis flavomarginatus		Taxonomy determined visually
Run 5, Sample 19	NA	CTmax	45.7	7.2	Animalia	Arthropoda	Insecta	Hemiptera	Nabidae	Nabis	Nabis flavomarginatus		Taxonomy determined visually
Run 5, Sample 21	BR2 + BF3	CTmax	44.96	8	Animalia	Arthropoda	Insecta	Hemiptera	Nabidae	Nabis	Nabis flavomarginatus	AAGGTTTCGATCTGTTAGTAATATATTAATAGCTCCTGCTAGTACTGGTAGGGATAATAATAGTAGTAGTGCTGTAATACCTACAGATCATACAAATAAAGGGATTCGTTCAGGTGTTATACCTACTGGTCGTATATTAATAATAGTTGAGATAAAGTTTACTGCCCCTAGGATTGATGATACTCCTGCTAAGTGTAGACTAAAAATCGCTAAGTCTACTGATGCACCATTATGGGCTACATTTGCTGAGAGGGGTGGATATACAGTTCATCCTGTACCTACACCTTTTTCTACAATACTACTAACAATTAGAAGGGTAATAGAGGGGGGTAGTAGTCAAAATCTTATATTATTTATACGGGGAAAGGCTATGTCGGG
Run 5, Sample 21	NA	CTmax	45.7	7.5	Animalia	Arthropoda	Insecta	Hemiptera	Nabidae	Nabis	Nabis flavomarginatus		Taxonomy determined visually
Run 5, Sample 27	NA	CTmax	44.21	8	Animalia	Arthropoda	Insecta	Hemiptera	Nabidae	Nabis	Nabis flavomarginatus		Taxonomy determined visually
Run 5, Sample 46	NA	CTmax	44.6	8	Animalia	Arthropoda	Insecta	Hemiptera	Nabidae	Nabis	Nabis flavomarginatus		Taxonomy determined visually
Run 5, Sample 77	NA	CTmax		7	Animalia	Arthropoda	Insecta	Hemiptera	Nabidae	Nabis	Nabis flavomarginatus		Taxonomy determined visually
Run 5, Sample 97	NA	CTmax	44.96	8	Animalia	Arthropoda	Insecta	Hemiptera	Nabidae	Nabis	Nabis flavomarginatus		Taxonomy determined visually
Run 6, Sample 2	NA	CTmax	44.91	7.4	Animalia	Arthropoda	Insecta	Hemiptera	Nabidae	Nabis	Nabis flavomarginatus		Taxonomy determined visually
Run 6, Sample 140	BR2 + BF3	CTmax	34.1	4.7	Animalia	Arthropoda	Insecta	Hemiptera	Nabidae	Nabis	Nabis flavomarginatus	TAGGAGCTCCTCCCCCTGCGTGGGTCAAAGAATGATGTATTAAAGTTTCGATCTGTTAGTAATATAGTAATAGCTCCTGCTAGTACTGGTAGGGATAATAATAGTAGTAGTGCTGTAATACCTACAGATCATACAAATAAAGGGATTCGTTCAGGTGTTATACCTACTGGTCGTATATTAATAATAGTTGAGATAAAGTTTACTGCCCCTAGGATTGATGATACTCCTGCTAAGTGTAGACTAAAAATCGCTAAGTCTACTGATGCACCATTATGGGCTACATTTGCTGAGAGGGGTGGATATACAGTTCATCCTGTACCTACACCTTTTTCTACAATACTACTAACAATTAGAAGGGTAATAGAGGGGGGTAGTAGTCAAAATCTTATATTATTTATA…
Run 6, Sample 22	NA	CTmax	45.64	7.9	Animalia	Arthropoda	Insecta	Hemiptera	Nabidae	Nabis	Nabis flavomarginatus		Taxonomy determined visually
Run 6, Sample 5	NA	CTmax	47.09	8	Animalia	Arthropoda	Insecta	Hemiptera	Nabidae	Nabis	Nabis flavomarginatus		Taxonomy determined visually
Run 6, Sample 67	NA	CTmax	45.77	8.2	Animalia	Arthropoda	Insecta	Hemiptera	Nabidae	Nabis	Nabis flavomarginatus		Taxonomy determined visually
Run 6, Sample 97	NA	CTmax	45.6	8.5	Animalia	Arthropoda	Insecta	Hemiptera	Nabidae	Nabis	Nabis flavomarginatus		Taxonomy determined visually
Run 1, Sample 20	NA	CTmax	49.53		Animalia	Arthropoda	Insecta	Hemiptera	Lygaeidae	Nysius	Nysius groenlandicus		Taxonomy determined visually
Run 1, Sample 21	NA	CTmax	51.12		Animalia	Arthropoda	Insecta	Hemiptera	Lygaeidae	Nysius	Nysius groenlandicus		Taxonomy determined visually
Run 1, Sample 23	NA	CTmax	49.6		Animalia	Arthropoda	Insecta	Hemiptera	Lygaeidae	Nysius	Nysius groenlandicus		Taxonomy determined visually
Run 1, Sample 27	NA	CTmax	50.92		Animalia	Arthropoda	Insecta	Hemiptera	Lygaeidae	Nysius	Nysius groenlandicus		Taxonomy determined visually
Run 1, Sample 30	NA	CTmax	49.7		Animalia	Arthropoda	Insecta	Hemiptera	Lygaeidae	Nysius	Nysius groenlandicus		Taxonomy determined visually
Run 1, Sample 32	NA	CTmax	50.36		Animalia	Arthropoda	Insecta	Hemiptera	Lygaeidae	Nysius	Nysius groenlandicus		Taxonomy determined visually
Run 1, Sample 33	NA	CTmax	49.76		Animalia	Arthropoda	Insecta	Hemiptera	Lygaeidae	Nysius	Nysius groenlandicus		Taxonomy determined visually
Run 1, Sample 4	NA	CTmax	50.01		Animalia	Arthropoda	Insecta	Hemiptera	Lygaeidae	Nysius	Nysius groenlandicus		Taxonomy determined visually
Run 1, Sample 45	NA	CTmax	49.94		Animalia	Arthropoda	Insecta	Hemiptera	Lygaeidae	Nysius	Nysius groenlandicus		Taxonomy determined visually
Run 1, Sample 5	NA	CTmax	50.05		Animalia	Arthropoda	Insecta	Hemiptera	Lygaeidae	Nysius	Nysius groenlandicus		Taxonomy determined visually
Run 2, Sample 101	NA	CTmin	-0.11		Animalia	Arthropoda	Insecta	Hemiptera	Lygaeidae	Nysius	Nysius groenlandicus		Taxonomy determined visually
Run 2, Sample 104	NA	CTmin	4.38		Animalia	Arthropoda	Insecta	Hemiptera	Lygaeidae	Nysius	Nysius groenlandicus		Taxonomy determined visually
Run 2, Sample 105	NA	CTmin	-1.89		Animalia	Arthropoda	Insecta	Hemiptera	Lygaeidae	Nysius	Nysius groenlandicus		Taxonomy determined visually
Run 2, Sample 106	NA	CTmin	-1.89		Animalia	Arthropoda	Insecta	Hemiptera	Lygaeidae	Nysius	Nysius groenlandicus		Taxonomy determined visually
Run 2, Sample 11	NA	CTmin	-2.56		Animalia	Arthropoda	Insecta	Hemiptera	Lygaeidae	Nysius	Nysius groenlandicus		Taxonomy determined visually
Run 2, Sample 110	NA	CTmin	-2.53		Animalia	Arthropoda	Insecta	Hemiptera	Lygaeidae	Nysius	Nysius groenlandicus		Taxonomy determined visually
Run 2, Sample 112	NA	CTmin	-1.78		Animalia	Arthropoda	Insecta	Hemiptera	Lygaeidae	Nysius	Nysius groenlandicus		Taxonomy determined visually
Run 2, Sample 113	NA	CTmin	0.67		Animalia	Arthropoda	Insecta	Hemiptera	Lygaeidae	Nysius	Nysius groenlandicus		Taxonomy determined visually
Run 2, Sample 115	NA	CTmin	-0.57		Animalia	Arthropoda	Insecta	Hemiptera	Lygaeidae	Nysius	Nysius groenlandicus		Taxonomy determined visually
Run 2, Sample 119	NA	CTmin	-2.39		Animalia	Arthropoda	Insecta	Hemiptera	Lygaeidae	Nysius	Nysius groenlandicus		Taxonomy determined visually
Run 2, Sample 123	NA	CTmin	-0.78		Animalia	Arthropoda	Insecta	Hemiptera	Lygaeidae	Nysius	Nysius groenlandicus		Taxonomy determined visually
Run 2, Sample 13	NA	CTmin	-2.58		Animalia	Arthropoda	Insecta	Hemiptera	Lygaeidae	Nysius	Nysius groenlandicus		Taxonomy determined visually
Run 2, Sample 18	NA	CTmin	-2.63		Animalia	Arthropoda	Insecta	Hemiptera	Lygaeidae	Nysius	Nysius groenlandicus		Taxonomy determined visually
Run 2, Sample 21	NA	CTmin	-2.65		Animalia	Arthropoda	Insecta	Hemiptera	Lygaeidae	Nysius	Nysius groenlandicus		Taxonomy determined visually
Run 2, Sample 47	NA	CTmin	-2.78		Animalia	Arthropoda	Insecta	Hemiptera	Lygaeidae	Nysius	Nysius groenlandicus		Taxonomy determined visually
Run 2, Sample 6	NA	CTmin	-1.87		Animalia	Arthropoda	Insecta	Hemiptera	Lygaeidae	Nysius	Nysius groenlandicus		Taxonomy determined visually
Run 2, Sample 64	NA	CTmin	-3.94		Animalia	Arthropoda	Insecta	Hemiptera	Lygaeidae	Nysius	Nysius groenlandicus		Taxonomy determined visually
Run 2, Sample 84	NA	CTmin	-0.53		Animalia	Arthropoda	Insecta	Hemiptera	Lygaeidae	Nysius	Nysius groenlandicus		Taxonomy determined visually
Run 2, Sample 89	NA	CTmin	-1		Animalia	Arthropoda	Insecta	Hemiptera	Lygaeidae	Nysius	Nysius groenlandicus		Taxonomy determined visually
Run 3, Sample 100	NA	CTmin	-1.28		Animalia	Arthropoda	Insecta	Hemiptera	Lygaeidae	Nysius	Nysius groenlandicus		Taxonomy determined visually
Run 3, Sample 102	NA	CTmin	-3.35		Animalia	Arthropoda	Insecta	Hemiptera	Lygaeidae	Nysius	Nysius groenlandicus		Taxonomy determined visually
Run 3, Sample 81	NA	CTmin	-2.53		Animalia	Arthropoda	Insecta	Hemiptera	Lygaeidae	Nysius	Nysius groenlandicus		Taxonomy determined visually
Run 3, Sample 99	NA	CTmin	-3.42		Animalia	Arthropoda	Insecta	Hemiptera	Lygaeidae	Nysius	Nysius groenlandicus		Taxonomy determined visually
Run 4, Sample 126	NA	CTmin	-3.12	4	Animalia	Arthropoda	Insecta	Hemiptera	Lygaeidae	Nysius	Nysius groenlandicus		Taxonomy determined visually
Run 4, Sample 127	NA	CTmin	-1.83	3.8	Animalia	Arthropoda	Insecta	Hemiptera	Lygaeidae	Nysius	Nysius groenlandicus		Taxonomy determined visually
Run 4, Sample 128	NA	CTmin	-3.18	3	Animalia	Arthropoda	Insecta	Hemiptera	Lygaeidae	Nysius	Nysius groenlandicus		Taxonomy determined visually
Run 4, Sample 54	NA	CTmin	-1.72	4.5	Animalia	Arthropoda	Insecta	Hemiptera	Lygaeidae	Nysius	Nysius groenlandicus		Taxonomy determined visually
Run 5, Sample 3	NA	CTmax	49.6	3.6	Animalia	Arthropoda	Insecta	Hemiptera	Lygaeidae	Nysius	Nysius groenlandicus		Taxonomy determined visually
Run 5, Sample 84	NA	CTmax	49.62	3.8	Animalia	Arthropoda	Insecta	Hemiptera	Lygaeidae	Nysius	Nysius groenlandicus		Taxonomy determined visually
Run 5, Sample 85	NA	CTmax	49.29	3.7	Animalia	Arthropoda	Insecta	Hemiptera	Lygaeidae	Nysius	Nysius groenlandicus		Taxonomy determined visually
Run 5, Sample 86	NA	CTmax	49.29	3.8	Animalia	Arthropoda	Insecta	Hemiptera	Lygaeidae	Nysius	Nysius groenlandicus		Taxonomy determined visually
Run 5, Sample 87	NA	CTmax	49.29	4.1	Animalia	Arthropoda	Insecta	Hemiptera	Lygaeidae	Nysius	Nysius groenlandicus		Taxonomy determined visually
Run 5, Sample 88	NA	CTmax	49.44	3.4	Animalia	Arthropoda	Insecta	Hemiptera	Lygaeidae	Nysius	Nysius groenlandicus		Taxonomy determined visually
Run 6, Sample 14	NA	CTmax	49.35	3.7	Animalia	Arthropoda	Insecta	Hemiptera	Lygaeidae	Nysius	Nysius groenlandicus		Taxonomy determined visually
Run 6, Sample 36	NA	CTmax	49.62	4.2	Animalia	Arthropoda	Insecta	Hemiptera	Lygaeidae	Nysius	Nysius groenlandicus		Taxonomy determined visually
Run 6, Sample 39	NA	CTmax	50.76	4	Animalia	Arthropoda	Insecta	Hemiptera	Lygaeidae	Nysius	Nysius groenlandicus		Taxonomy determined visually
Run 6, Sample 41	NA	CTmax	50.13	3.4	Animalia	Arthropoda	Insecta	Hemiptera	Lygaeidae	Nysius	Nysius groenlandicus		Taxonomy determined visually
Run 6, Sample 56	NA	CTmax	49.47	4.3	Animalia	Arthropoda	Insecta	Hemiptera	Lygaeidae	Nysius	Nysius groenlandicus		Taxonomy determined visually
Run 6, Sample 64	NA	CTmax	51.29	3.6	Animalia	Arthropoda	Insecta	Hemiptera	Lygaeidae	Nysius	Nysius groenlandicus		Taxonomy determined visually
Run 6, Sample 78	NA	CTmax	49.32	4.2	Animalia	Arthropoda	Insecta	Hemiptera	Lygaeidae	Nysius	Nysius groenlandicus		Taxonomy determined visually
Run 6, Sample 85	NA	CTmax	50.33	4	Animalia	Arthropoda	Insecta	Hemiptera	Lygaeidae	Nysius	Nysius groenlandicus		Taxonomy determined visually
Run 6, Sample 92	NA	CTmax	49.53	3.9	Animalia	Arthropoda	Insecta	Hemiptera	Lygaeidae	Nysius	Nysius groenlandicus		Taxonomy determined visually
Run 6, Sample 96	NA	CTmax	49.82	4	Animalia	Arthropoda	Insecta	Hemiptera	Lygaeidae	Nysius	Nysius groenlandicus		Taxonomy determined visually
Run 1, Sample 31	NA	CTmax	47.18		Animalia	Arthropoda	Insecta	Hemiptera	Cicadellidae	Psammotettix	Psammotettix lividellus		Taxonomy determined visually
Run 1, Sample 35	NA	CTmax	48.11		Animalia	Arthropoda	Insecta	Hemiptera	Cicadellidae	Psammotettix	Psammotettix lividellus		Taxonomy determined visually
Run 1, Sample 38	NA	CTmax	48.21		Animalia	Arthropoda	Insecta	Hemiptera	Cicadellidae	Psammotettix	Psammotettix lividellus		Taxonomy determined visually
Run 1, Sample 43	NA	CTmax	42.96		Animalia	Arthropoda	Insecta	Hemiptera	Cicadellidae	Psammotettix	Psammotettix lividellus		Taxonomy determined visually
Run 2, Sample 117	NA	CTmin	0.19		Animalia	Arthropoda	Insecta	Hemiptera	Cicadellidae	Psammotettix	Psammotettix lividellus		Taxonomy determined visually
Run 2, Sample 118	NA	CTmin	-2.42		Animalia	Arthropoda	Insecta	Hemiptera	Cicadellidae	Psammotettix	Psammotettix lividellus		Taxonomy determined visually
Run 2, Sample 125	NA	CTmin	-3.79		Animalia	Arthropoda	Insecta	Hemiptera	Cicadellidae	Psammotettix	Psammotettix lividellus		Taxonomy determined visually
Run 2, Sample 30	NA	CTmin	-4.32		Animalia	Arthropoda	Insecta	Hemiptera	Cicadellidae	Psammotettix	Psammotettix lividellus		Taxonomy determined visually
Run 2, Sample 35	NA	CTmin	15.43		Animalia	Arthropoda	Insecta	Hemiptera	Cicadellidae	Psammotettix	Psammotettix lividellus		Taxonomy determined visually
Run 2, Sample 4	NA	CTmin	-4.63		Animalia	Arthropoda	Insecta	Hemiptera	Cicadellidae	Psammotettix	Psammotettix lividellus		Taxonomy determined visually
Run 2, Sample 42	NA	CTmin			Animalia	Arthropoda	Insecta	Hemiptera	Cicadellidae	Psammotettix	Psammotettix lividellus		Taxonomy determined visually
Run 2, Sample 48	NA	CTmin	-4.24		Animalia	Arthropoda	Insecta	Hemiptera	Cicadellidae	Psammotettix	Psammotettix lividellus		Taxonomy determined visually
Run 3, Sample 56	NA	CTmin	-5.13		Animalia	Arthropoda	Insecta	Hemiptera	Cicadellidae	Psammotettix	Psammotettix lividellus		Taxonomy determined visually
Run 5, Sample 70	NA	CTmax	37	2.9	Animalia	Arthropoda	Insecta	Hemiptera	Cicadellidae	Psammotettix	Psammotettix lividellus		Taxonomy determined visually
Run 5, Sample 71	NA	CTmax		3.4	Animalia	Arthropoda	Insecta	Hemiptera	Cicadellidae	Psammotettix	Psammotettix lividellus		Taxonomy determined visually
Run 5, Sample 74	NA	CTmax	47.29	3.3	Animalia	Arthropoda	Insecta	Hemiptera	Cicadellidae	Psammotettix	Psammotettix lividellus		Taxonomy determined visually
Run 6, Sample 114	NA	CTmax		3	Animalia	Arthropoda	Insecta	Hemiptera	Cicadellidae	Psammotettix	Psammotettix lividellus		Taxonomy determined visually
Run 6, Sample 116	NA	CTmax	40.74	3	Animalia	Arthropoda	Insecta	Hemiptera	Cicadellidae	Psammotettix	Psammotettix lividellus		Taxonomy determined visually
Run 6, Sample 16	NA	CTmax	48.17	3.4	Animalia	Arthropoda	Insecta	Hemiptera	Cicadellidae	Psammotettix	Psammotettix lividellus		Taxonomy determined visually
Run 6, Sample 21	BR2 + BF3	CTmax	48.52	2.9	Animalia	Arthropoda	Insecta	Hemiptera	Cicadellidae	Psammotettix	Psammotettix lividellus	TATCCCTCCTCCTGCAGGGTCAAAAAATGTTGTGTTGATATTTCGATCAGTTAAGAGTATTGTGATTGCTCCTGCTAAAACTGGAAGAGATAATAGTAATAAAACTGCTGTAATTAGCACAGATCATACAAATAATGGTGTACGGTCTAAGGTTATTCCTGCAGGACGCATATTTATCACAGTTGAGATAAAGTTTACTGCTCCTAGAATTGAAGAGATTCCTGCAAGATGGAGTGAGAAGATTGATATATCAACTCTAACTCCTGCATGTGCAATGTTTCTAGATAATGGTGGGTAAACTGTTCATCCTGTCCCTACTCCTATTTCAATAATAGATCTTATTATAAGTAAGGTAATTGATGGTGGTAAAAGTCAAAATCTTATATTGTTTAGTCGGGG…
Run 6, Sample 54	NA	CTmax	48.24	3.1	Animalia	Arthropoda	Insecta	Hemiptera	Cicadellidae	Psammotettix	Psammotettix lividellus		Taxonomy determined visually
Run 6, Sample 77	NA	CTmax	48.48	4	Animalia	Arthropoda	Insecta	Hemiptera	Cicadellidae	Psammotettix	Psammotettix lividellus		Taxonomy determined visually
Run 6, Sample 82	NA	CTmax	42.79	2.7	Animalia	Arthropoda	Insecta	Hemiptera	Cicadellidae	Psammotettix	Psammotettix lividellus		Taxonomy determined visually
Run 1, Sample 18	BR2 + BF3	CTmax	42.36	1.9	Animalia	Arthropoda	Insecta	Hemiptera	Sternorrhyncha	Psyllidae	Psyllidae sp.	AAAAAAAGGGGTTGGGTATAAGAATAGGGAATCCCCTCCTCCCGCAGGGTCAAAAAAGGTGGTATTTATATTTCGATCAGTTAACAGTATTGTAATAGCTCCTGCGAGTACTGGGAGAGCTAATAGAAGAAGAAAGGCAGTGATTAGAACCGATCATACAAACAAAGGTAGTTTTTCTATTGTATGTAAATTTCTTCGTATGTTAATGATTGTAGTAATAAAATTGATAGCCCCAAGAATTGAAGAGATTCCTGCTAAATGAAGAGAAAAAATAGCTGTGTCAACAGAGTACCCACTATGAAATATTGAATTAGATAAGGGGGGGTATACAGTTCACCCTGTCCCTACTCCCTGGTCAATTAAACTTCTTATTAAAAGTAGATAAAGGGAAGGGATAAG…	0.9
Run 1, Sample 28	BR2 + BF3	CTmax	43.49	2.1	Animalia	Arthropoda	Insecta	Hemiptera	Sternorrhyncha	Psyllidae	Psyllidae sp.	GAATAGGGAATCCCCTCCTCCCGCAGGGGTCAAAAAAGGTGGTATTTATATTTCGATCAGTTAACAGTATTGTAATAGCTCCTGCGAGTACTGGGAGAGCTAATAGAAGAAGAAAGGCAGTGATTAGAACCGATCATACAAACAAAGGTAGTTTTTCTATTGTATGTAAATTTCTTCGTATGTTAATGATTGTAGTAATAAAATTGATAGCCCCAAGAATTGAAGAGATTCCTGCTAAATGAAGAGAAAAAATAGCTGTGTCAACAGAGTACCCACTATGAAATATTGAATTAGATAAGGGGGGGTATACAGTTCACCCTGTCCCTACTCCCTGGTCAATTAAACTTCTTATTAAAAGTAGATAAAGGGAAGGGATAAGGAGTCAGAAGCTGAGATTAT…	0.9
Run 1, Sample 29	BR2 + BF3	CTmax	42.59	2.15	Animalia	Arthropoda	Insecta	Hemiptera	Sternorrhyncha	Psyllidae	Psyllidae sp.	AAGGTGGTTGGGTATAAGAATAGGGAATCCCCTCCTCCCGCAGGGTCAAAAAAGGTGGTATTTATATTTCGATCAGTTAACAGTATTGTAATAGCTCCTGCGAGTACTGGGAGAGCTAATAGAAGAAGAAAGGCAGTGATTAGAACCGATCATACAAACAAAGGTAGTTTTTCTATTGTATGTAAATTTCTTCGTATGTTAATGATTGTAGTAATAAAATTGATAGCCCCAAGAATTGAAGAGATTCCTGCTAAATGAAGAGAAAAAATAGCTGTGTCAACAGAGTACCCACTATGAAATATTGAATTAGATAAGGGGGGGTATACCGTTCCCCCTGGCCCTACTCCCTGGTCAATTAAACTTCTTATTAAAAGTAAATAAAGGGAAGGGATAAGGAGT…	0.9
Run 1, Sample 42	BR2 + BF3	CTmax	50.53	2	Animalia	Arthropoda	Insecta	Hemiptera	Sternorrhyncha	Psyllidae	Psyllidae sp.	AAAGGGGTTGGGTATAAGAATAGGGAATCCCCTCCTCCCGCAGGGTCAAAAAAGGTGGTATTTATATTTCGATCAGTTAACAGTATTGTAATAGCTCCTGCGAGTACTGGGAGAGCTAATAGAAGAAGAAAGGCAGTGATTAGAACCGATCATACAAACAAAGGTAGTTTTTCTATTGTATGTAAATTTCTTCGTATGTTAATGATTGTAGTAATAAAATTGATAGCCCCAAGAATTGAAGAGATTCCTGCTAAATGAAGAGAAAAAATAGCTGTGTCAACAGAGTACCCACTATGAAATATTGAATTAGATAAGGGAGGGTATACAGTTCACCCTGTCCCTACTCCCTGGTCAATTAAACTTCTTATCAAAAGTAGATAAAGGGAAGGGATAAGGAGT…	0.9
Run 1, Sample 54	BR2 + BF3	CTmax	40.08	1.5	Animalia	Arthropoda	Insecta	Hemiptera	Sternorrhyncha	Psyllidae	Psyllidae sp.	TAGGATACCCCTCCTCCCGCAGGGTCAAAAAAGGTGGTATTTATATTTCGATCAGTTAACAGTATTGTAATAGCTCCTGCGAGTACTGGGAGAGCTAATAGAAGAAGAAAGGCAGTGATTAGAACCGATCATACAAACAAAGGTAGTTTTTCTATTGTATGTAAATTTCTTCGTATGTTAATGATTGTAGTAATAAAATTGATAGCCCCAAGAATTGAAGAGATTCCTGCTAAATGAAGAGAAAAAATAGCTGTGTCAACAGAGTACCCACTATGAAATATTGAATTAGATAAGGGGGGGGAATCC	90.5 %
Run 1, Sample 55	BR2 + BF3	CTmax	42.29	1.5	Animalia	Arthropoda	Insecta	Hemiptera	Sternorrhyncha	Psyllidae	Psyllidae sp.	GGGTTTGGGTATAAAGAATAGGGAATCCCCTCCTCCCGCAGGGTCAAAAAAGGTGGTATTTATATTTCGATCAGTTAACAGTATTGTAATAGCTCCTGCGAGTACTGGGAGAGCTAATAGAAGAAGAAAGGCAGTGATTAGAACCGATCATACAAACAAAGGTAGTTTTTCTATTGTATGTAAATTTCTTCGTATGTTAATGATTGTAGTAATAAAATTGATAGCCCCAAGAATTGAAGAGATTCCTGCTAAATGAAGAGAAAAAATAGCTGTGTCAACAGAGTACCCACTATGAAATATTGAATTAGATAAGGGAGGGTATACAGTTCACCCTGTCCCTACTCCCTGGTCAATTAAACTTCTTATTAAAAGTAGATAAAGGGAAGGGATAAGGAGTCA…	0.9
Run 5, Sample 130	BR2 + BF3	CTmax	40.71	2.5	Animalia	Arthropoda	Insecta	Hemiptera	Sternorrhyncha	Psyllidae	Psyllidae sp.	GGTCCCTCCTCCCGCAGGGTCAAAAAAGGTGGTATTTATATTTCGATCAGTTAACAGTATTGTAATACCTCCTGCGAGTACTGGGAGAGCTAATAGAAGAAGAAAGGCGGTGATTAGAACCGATCATACAAACAAAGGTAGTTTTTCTATTGTATGTAAATTTCTTCGTATGTTAATGATTGTAGTAATAAAATTGATAGCCCCAAGAATTGAAAAGATTCCTGCTAAATGAAAAGAAAAAATAGCTGTGTCAACAGAGTACCCACTATGAAATATTGAATTAAATAAGGGAGGGTATACAGTTCACCCTGTCCCTACTCCCTGGTCAATTAAACTTCTTATTAAAAGTAGATAAAGGGAAGGGATAAGGAGTCAGAAGCTGAGATTATTCAACCGGGG…	89.7 %
Run 1, Sample 36	BR2 + BF3	CTmax	41.18	1.6	Animalia	Arthropoda	Insecta	Hemiptera	Sternorrhyncha	Psyllidae	Psyllidae sp.	AGGTGGTTGGGTATAAGAATAGGGAATCCCCTCCTCCCGCAGGGTCAAAAAGGTGGTATTTATATTTCGATCGGTTAACAGTATTGTGATAGCTCCTGCGAGTACTGGGAGAGCTAATAGAAGAAGAAAGGCAGTGATTAGAACCGATCATACAAACAAAGGTAGTTTTTCTATTGTATGTAAATTTCTTCGTATGTTAATGATTGTAGTAATAAAATTGATAGCCCCAAGAATTGAAGAGATTCCTGCTAAATGAAGAGAAAAAATAGCTGTGTCAACAGAGTACCCACTATGAAATATTGAATTAGATAAGGGGGGGTATACAGTTCACCCTGTCCCTACTCCCTGGTCAATTAAACTTCTTATTAAAAGTAGATAAAGGGAAGGGATAAGGAGTCA…	89.7 %
Run 1, Sample 36.2	BR2 + BF3	CTmax	42.77	1.9	Animalia	Arthropoda	Insecta	Hemiptera	Sternorrhyncha	Psyllidae	Psyllidae sp.	TAAGAATAGGGAATCCCCTCCCTCCCGCAGGGTCAAAAAAGGTGGTATTTATATTTCGATCAGTTAACAGTATTGTAATAGCTCCTGCGAGTACTGGGAGAGCTAATAGAAGAAGAAAGGCAGTGATTAGAACCGATCATACAAACAAAGGTAGTTTTTCTATTGTATGTAAATTTCTTCGTATGTTAATGATTGTAGTAATAAAATTGATAGCCCCAAGAATTGAAGAGATTCCTGCTAAATGAAGAGAAAAAATAGCTGTGTCAACAGAGTACCCACTATGAAATATTGAATTAGATAAGGGGGGGTATACAGTTCACCCTGTCCCTACTCCCTGGTCAATTAAACTTCTTATTAAAAGTAGATAAAGGGAAGGGATAAGGAGTCAGAAGCTGAGAT…	0.9
Run 1, Sample 44	BR2 + BF3	CTmax	42.04	1.4	Animalia	Arthropoda	Insecta	Hemiptera	Sternorrhyncha	Psyllidae	Psyllidae sp.	TTTAAAGAATAGGGAATCCCCTCCTCCCGCAGGGTCAAAAAAGGTGGTATTTATATTTCGATCAGTTAACAGTATTGTAATAGCTCCTGCGAGTACTGGGAGAGCTAATAGAAGAAGAAAGGCAGTGATTAGAACCGATCATACAAACAAAGGTAGTTTTTCTATTGTATGTAAATTTCTTCGTATGTTAATGATTGTAGTAATAAAATTGATAGCCCCAAGAATTGAAGAGATTCCTGCTAAATGAAGAGAAAAAATAGCTGTGTCAACAGAGTACCCACTATGAAATATTGAATTAGATAAGGGGGGGTATACAGTTCACCCTGTCCCTACTCCCTGGTCAATTAAACTTCTTATTAAAAGTAGATAAAGGGAAGGGATAAGGAGTCAGAAGCTGAG…	0.9
Run 1, Sample 56	BR2 + BF3	CTmax	42.4	1.4	Animalia	Arthropoda	Insecta	Hemiptera	Sternorrhyncha	Psyllidae	Psyllidae sp.	AATAGGGAATCCCCTCCTCCCGCAGGGTCAAAAAAGGTGGTATTTATATTTCGATCAGTTAACAGTATTGTAATAGCTCCTGCGAGTACTGGGAGAGCTAATAGAAGAAGAAAGGCAGTGATTAGAACCGATCATACAAACAAAGGTAGTTTTTCTATTGTATGTAAATTTCTTCGTATGTTAATGATTGTAGTAATAAAATTGATAGCCCCAAGAATTGAAGAGATTCCTGCTAAATGAAGAGAAAAAATAGCTGTGTCAACAGAGTACCCACTATGAAATATTGAATTAGATAAGGGGGGGTATACAGTTCACCCTGTCCCTACTCCCTGGTCAATTAAACTTCTTATTAAAAGTAGATAAAGGGAAGGGATAAGGAGTCAGAAGCTGAGATTATTC…	90.5 %
Run 3, Sample 85	BR2 + BF3	CTmin	-2.71	1.7	Animalia	Arthropoda	Insecta	Hemiptera	Sternorrhyncha	Psyllidae	Psyllidae sp.	TATAAGAATAGGGAATCCCCTCCTCCCGCAGGGTCAAAAAGGTGGTATTTATATTTCGATCAGTTAACAGTATTGTAATAGCTCCTGCGAGTACTGGGAGAGCTAATAGAAGAAGAAAGGCAGTGATTAGAACCGATCATACAAACAAAGGTAGTTTTTCTATTGTATGTAAATTTCTTCGTATGTTAATGATTGTAGTAATAAAATTGATAGCCCCAAGAATTGAAGAGATTCCTGCTAAATGAAGAGAAAAAATAGCTGTGTCAACAGAGTACCCACTATGAAATATTGAATTAGATAAGGGGGGGTATACAGTTCACCCTGTCCCTACTCCCTGGTCAATTAAACTTCTTATTAAAAGTAGATAAAGGGAAGGGATAAGGAGTCAGAAGCTGAGAT…	90.2 %
Run 3, Sample 77	LCO1490 + HCO2198	CTmin	-2.27	2.3	Animalia	Arthropoda	Insecta	Hemiptera	Aphididae	Pterocomma	Pterocomma sp.	AAATTAGGGGTCCTCCCCTCCTGCTGGGTCAAAAATGATGTATTTAAATTTCGATCAGTTAATAATATTGTAATAGCACCTGCTAATACAGGTAGGGATAAAATTAATAAAATAGCTGTAATTAAAATTGATCATGGGAATAATGGAATTTGATTTAATTTTATATTATATGGTATTATGTTTAAAATAGTACAAATAAAATTAATTGCTCCTAGAATAGAAGAAATACCTGCTAAATGAAGGGAAAAAATAGTTAAATCAACTGAAATATTGTTATGTGCAATATTATTTGATAAGGGAGGATAAATAGTTCAACCTGTTCCTGTTCCATTATTAATTAGGAATCTACAAATTATTATTATTAAAGAAGGTGGTAAAAGTCAGAATCTAATATTATTT…
Run 4, Sample 90	LCO1490 + HCO2198	CTmin	0.67	2	Animalia	Arthropoda	Insecta	Hemiptera	Aphididae		Aphididae sp.	CCGGCAGGGATCAAAAAATGAGGTATTTAAATTACGATCAGTTAATAATATAGTAATAGCACCAGCTAGAACTGGTAATGATAAAATTAATAAAATAGCTGTAATTAGAATCGATCAAGGGAAAAGTGGAATTTGATTTAATTTTATATTATTTGGTATTATATTTAAAATTGTACAAATAAAATTAATTGCTCCTAAAATTGATGAAATTCCTGCTAAATGTAAAGAGAAAATTGTTAAATCAACTGAAATATTATTGTGTGCAATATTATTTGATAAAGGTGGATAAATAGTTCATCCTGTTCCTGTTCCATTATTAATTATAAAACTACAAATTATTATTATTAATGAAGGGGGTAATAATCAAAATCTAATATTGTTTAAACGTGGAAATGATAT…
Run 5, Sample 112	LCO1490 + HCO2198	CTmax		2.4	Animalia	Arthropoda	Insecta	Hemiptera	Aphididae		Aphididae sp.	AAAAATGTTGAATATAAATTGGGATCTCCACCTCCTGCTGGGATCAAAAATGAGGTATTTAAATTACGATCAGTTAATAATATAGTAATAGCACCAGCTAGAACTGGTAATGATAAAATTAATAAAATAGCTGTAATTAGAATTGATCAAGGGAAAAGTGGAATTTGATTTAATTTTATATTATTTGGTATTATATTTAAAATTGTACAAATAAAATTAATTGCTCCTAAAATTGATGAAATTCCTGCTAAATGTAAAGAGAAAATTGTTAAATCAACTGAAATATTATTGTGTGCAATATTATTTGATAAAGGTGGATAAATAGTTCATCCTGTTCCTGTTCCATTATTAATTATAAAACTACAAATTATTATTATTAATGAAGGGGGTAATAATCAA…
Run 5, Sample 113	LCO1490 + HCO2198	CTmax		1.2	Animalia	Arthropoda	Insecta	Hemiptera	Aphididae		Aphididae sp.	AAAAATGTTGAAATTAAATTGGGATCTCCACCTCCTGCTGGGATCAAAAATGAGGTATTTAAATTACGATCAGTTAATAATATAGTAATAGCACCAGCTAGAACTGGTAATGATAAAATTAATAAAATAGCTGTAATTAGAATTGATCAAGGGAAAAGTGGAATTTGATTTAATTTTATATTATTTGGTATTATATTTAAAATTGTACAAATAAAATTAATTGCTCCTAAAATTGATGAAATTCCTGCTAAATGTAAAGAGAAAATTGTTAAATCAACTGAAATATTATTGTGTGCAATATTATTTGATAAAGGTGGATAAATAGTTCATCCTGTTCCTGTTCCATTATTAATTATAAAACTACAAATTATTATTATTAATGAAGGGGGTAATAATCAA…
Run 5, Sample 114	LCO1490 + HCO2198	CTmax		1	Animalia	Arthropoda	Insecta	Hemiptera	Aphididae		Aphididae sp.	GTTGAAATTAAATTGGGATCTCCACCTCCTGCTGGGATCAAAAATGAGGTATTTAAATTACGATCAGTTAATAATATAGTAATAGCACCAGCTAGAACTGGTAATGATAAAATTAATAAAATAGCTGTAATTAGAATTGATCAAGGGAAAAGTGGAATTTGATTTAATTTTATATTATTTGGTATTATATTTAAAATTGTACAAATAAAATTAATTGCTCCTAAAATTGATGAAATTCCTGCTAAATGTAAAGAGAAAATTGTTAAATCAACTGAAATATTATTGTGTGCAATATTATTTGATAAAGGTGGATAAATAGTTCATCCTGTTCCTGTTCCATTATTAATTATAAAACTACAAATTATTATTATTAATGAAGGGGGTAATAATCAAAATCTA…
Run 5, Sample 115	LCO1490 + HCO2198	CTmax		0.6	Animalia	Arthropoda	Insecta	Hemiptera	Aphididae		Aphididae sp.	AAAAATGTTGATTAAATTGGGATCTCCACCTCCTGCTGGATCAAAAATGAGGTATTTAAATTACGATCAGTTAATAATATAGTAATAGCACCAGCTAGAACTGGTAATGATAAAATTAATAAAATAGCTGTAATTAGAATTGATCAAGGGAAAAGTGGAATTTGATTTAATTTTATATTATTTGGTATTATATTTAAAATTGTACAAATAAAATTAATTGCTCCTAAAATTGATGAAATTCCTGCTAAATGTAAAGAGAAAATTGTTAAATCAACTGAAATATTATTGTGTGCAATATTATTTGATAAAGGTGGATAAATAGTTCATCCTGTTCCTGTTCCATTATTAATTATAAAACTACAAATTATTATTATTAATGAAGGGGGTAATAATCAAAAT…
Run 5, Sample 123	LCO1490 + HCO2198	CTmax		0.7	Animalia	Arthropoda	Insecta	Hemiptera	Aphididae		Aphididae sp.	GTTGAAATTAAATTGGGATCTCCACCCTCCTGCTGGATCAAGAAATGAGGTATTTAAATTACGATCAGTTAATAATATAGTAATAGCACCAGCTAGAACTGGTAATGATAAAATTAAAAAAATAGCTGTAATTAGAATTGATCAAGGGAAAAGTGGAATTTGATTTAATTTTATATTATTTGGTATTATATTTAAAATTGTACAAATAAAATTAATTGCTCCTAAAATTGATGAAATTCCTGCTAAATGTAAAGAGAAAATTGTTAAATCAACTGAAATATTATTGTGTGCAATATTATTTGATAAAGGTGGATAAATAGTTCATCCTGTTCCTGTTCCATTATTAATTATAAAACTACAAATTATTATTATTAATGAAGGGGGTAATAATCAAAATCT…
Run 5, Sample 125	LCO1490 + HCO2198	CTmax		1.1	Animalia	Arthropoda	Insecta	Hemiptera	Aphididae		Aphididae sp.	TGTTGAAATTAAATTGGGATCTCCACCTCCTGCTGGATCAAAAATGAGGTATTTAAATTACGATCAGTTAATAATATAGTAATAGCACCAGCTAGAACTGGTAATGATAAAATTAATAAAATAGCTGTAATTAGAATTGATCAAGGGAAAAGTGGAATTTGATTTAATTTTATATTATTTGGTATTATATTTAAAATTGTACAAATAAAATTAATTGCTCCTAAAATTGATGAAATTCCTGCTAAATGTAAAGAGAAAATTGTTAAATCAACTGAAATATTATTGTGTGCAATATTATTTGATAAAGGTGGATAAATAGTTCATCCTGTTCCTGTTCCATTATTAATTATAAAACTACAAATTATTATTATTAATGAAGGGGGTAATAATCAAAATCTA…
Run 5, Sample 126	LCO1490 + HCO2198	CTmax		0.8	Animalia	Arthropoda	Insecta	Hemiptera	Aphididae		Aphididae sp.	TGGATTTAAATTGGGATCTCCACCCTCCTGCTGGGATCAAAAAATGAGGTATTTAAATTACGATCAGTTAATAATATAGTAATAGCACCAGCTAGAACTGGTAAAGATAAAATTAATAAAATAGCTGTAATTACAATTGATCAAGGGAAAAGTGGAATTTGATTTAATTTTATATTATTTGGTATTATATTTAAAATTGTACAAATAAAATTAATTGCTCCTAAAATTGATGAAATTCCTGCTAAATGTAAAGAGAAAATTGTTAAATCAACTGAAATATTATTGGGTGCAATATTATTTGATAAGGGTGGATAAATAGTTCATCCTGTTCCTGTTCCTTTATTAATTATCA	97.67 %
Run 5, Sample 127	LCO1490 + HCO2198	CTmax	43.11	1.5	Animalia	Arthropoda	Insecta	Hemiptera	Aphididae		Aphididae sp.	TTGAAAAAAATTGCGATCTCCACCTCCTGCTGGATCAAAAATGAGGTATTTAAATTACGATCAGTTAATAATATAGTAATAGCACCAGCTAGAACTGGTAATGATAAAATTAATAAAATAGCTGTAATTAGAATTGATCAAGGGAAAAGTGGAATTTGATTTAATTTTATATTATTTGGTATTATATTTAAAATTGTACAAATAAAATTAATTGCTCCTAAAATTGATGAAATTCCTGCTAAATGTAAAGAGAAAATTGTTAAATCAACTGAAATATTATTGTGTGCAATATTATTTGATAAAGGTGGATAAATAGTTCATCCTGTTCCTGTTCCATTATTAATTATAAAACTACAAATTATTATTATTAATGAAGGGGGTAATAATCAAAATCTAATA…
Run 5, Sample 9	LCO1490 + HCO2198	CTmax		0.9	Animalia	Arthropoda	Insecta	Hemiptera	Aphididae		Aphididae sp.	ATTAAAATTGCGATCCTCCACCTCCTGCTGGATCAAAAATGAGGTATTTAAATTACGATCAGTTAATAATATAGTAATAGCACCAGCTAGAACTGGTAATGATAAAATTAATAAAATAGCTGTAATTAGAATTGATCAAGGGAAAAGTGGAATTTGATTTAATTTTATATTATTTGGTATTATATTTAAAATTGTACAAATAAAATTAATTGCTCCTAAAATTGATGAAATTCCTGCTAAATGTAAAGAGAAAATTGTTAAATCAACTGAAATATTATTGTGTGCAATATTATTTGATAAAGGTGGATAAATAGTTCATCCTGTTCCTGTTCCATTATTAATTATAAAACTACAAATTATTATTATTAATGAAGGGGGTAATAATCAAAATCTAATATT…
Run 3, Sample 114	LCO1490 + HCO2198	CTmin	-3.02	2	Animalia	Arthropoda	Insecta	Hemiptera	Aphididae	Utamphorophora	Utamphorophora sp.	GGTTATAATAGGGATCTCCTCCTCCTGCTGGGTCAAAAATGATGTATTTAAATTACGATCAGTTAATAATATTGTAATAGCACCAGCTAATACTGGTAAAGATAAAATTAATAAAATAGCTGTAATTAAAATTGATCAAGGAAATAGGGGAATTTGATTTAATTTTATGTTATTAGGTATTATATTTAAAATTGTACAAATAAAATTAATTGCTCCTAGAATTGATGAAATTCCTGCTAAATGTAATGAAAAGATTGTTAAGTCAACTGAAATATTATTGTGTGCAATGTTATTAGATAGAGGTGGATAAATAGTTCATCCTGTTCCTGTTCCATTATTAATTAAAAATCTACAAATTATTATTATTAATGATGGGGGTAATAATCAAAATCTAATGTT…
Run 1, Sample 1	LCO1490 + HCO2198			11	Animalia	Arthropoda	Insecta	Hymenoptera	Apidae	Apis	Apis mellifera	GAATAAAAGTTGGGATCTCCACCCTCCTATAGGGATCAAAAAATGATGTATTAAAATTTCGATCAAATAATAGTATAGTAATTGCTCCAGCTAATACAGGTAATGATATAATTAATAAAATTGCTGTAATAAAAACTGATCATGGAAATAATGAAATTTGGTCATAATTTATAGAAAAATTTTTTATTATTATAATTGTAACTATTAAATTTAATGATCCTATAATTGAGGAAATTCCTGATATATGAAGAGAAAAAATTGCAAAATCTACTGAAGGTGAAGAATGATATAAATATGCTGATAATGGTGGATATACTGTTCATCCAGTTCCTGGTCTTGGGTAAAATAAATTTCTTAATAAAAGTATTAATAATGAGGGAGGAAGTAATCAAAATCTAA…
Run 5, Sample 16	LCO1490 + HCO2198			18	Animalia	Arthropoda	Insecta	Hymenoptera	Apidae	Apis	Apis mellifera	AAAAATGTTGATATAAATTGGGATCTCCACCTCCTATAGGATCAAAAAATGATGTATTAAAATTTCGATCAAATAATAGTATAGTAATTGCTCCAGCTAATACAGGTAATGATATAATTAATAAAATTGCTGTAATAAAAACTGATCATGGAAATAATGAAATTTGGTCATAATTTATAGAAAAATTTTTTATTATTATAATTGTAACTATTAAATTTAATGATCCTATAATTGAGGAAATTCCTGATATATGAAGAGAAAAAATTGCAAAATCTACTGAAGGTGAAGAATGATATAAATATGCTGATAATGGTGGATATACTGTTCATCCAGTTCCTGGTCTTGGGTAAAATAAATTTCTTAATAAAAGTATTAATAATGAGGGAGGAAGTAATCAAA…
Run 5, Sample 78	LCO1490 + HCO2198			12	Animalia	Arthropoda	Insecta	Hymenoptera	Apidae	Apis	Apis mellifera	AAAAATGTTGAAATTAAATTGGGATCTCCACCTCCTATAGGATCAAAAAATGATGTATTAAAATTTCGATCAAATAATAGTATAGTAATTGCTCCAGCTAATACAGGTAATGATATAATTAATAAAATTGCTGTAATAAAAACTGATCATGGAAATAATGAAATTTGGTCATAATTTATAGAAAAATTTTTTATTATTATAATTGTAACTATTAAATTTAATGATCCTATAATTGAGGAAATTCCTGATATATGAAGAGAAAAAATTGCAAAATCTACTGAAGGTGAAGAATGATATAAATATGCTGATAATGGTGGATATACTGTTCATCCAGTTCCTGGTCTTGGGTAAAATAAATTTCTTAATAAAAGTATTAATAATGAGGGAGGAAGTAATCAA…
Run 5, Sample 79	LCO1490 + HCO2198			11	Animalia	Arthropoda	Insecta	Hymenoptera	Apidae	Apis	Apis mellifera	TGAAATTAAATTGGGATCTCCACCCTCCTATAGGATCAAAAAATGATGTATTAAAATTTCGATCAAATAATAGTATAGTAATTGCTCCAGCTAATACAGGTAATGATATAATTAATAAAATTGCTGTAATAAAAACTGATCATGGAAATAATGAAATTTGGTCATAATTTATAGAAAAATTTTTTATTATTATAATTGTAACTATTAAATTTAATGATCCTATAATTGAGGAAATTCCTGATATATGAAGAGAAAAAATTGCAAAATCTACTGAAGGTGAAGAATGATATAAATATGCTGATAATGGTGGATATACTGTTCATCCAGTTCCTGGTCTTGGGTAAAATAAATTTCTTAATAAAAGTATTAATAATGAGGGAGGAAGTAATCAAAATCTAA…
Run 5, Sample 80	LCO1490 + HCO2198			14	Animalia	Arthropoda	Insecta	Hymenoptera	Apidae	Apis	Apis mellifera	AAAAATGTTGATTAAATTGGGATCTCCACCTCCTATAGGATCAAAAAATGATGTATTAAAATTTCGATCAAATAATAGTATAGTAATTGCTCCAGCTAATACAGGTAATGATATAATTAATAAAATTGCTGTAATAAAAACTGATCATGGAAATAATGAAATTTGGTCATAATTTATAGAAAAATTTTTTATTATTATAATTGTAACTATTAAATTTAATGATCCTATAATTGAGGAAATTCCTGATATATGAAGAGAAAAAATTGCAAAATCTACTGAAGGTGAAGAATGATATAAATATGCTGATAATGGTGGATATACTGTTCATCCAGTTCCTGGTCTTGGGTAAAATAAATTTCTTAATAAAAGTATTAATAATGAGGGAGGAAGTAATCAAAA…
Run 5, Sample 82	LCO1490 + HCO2198			11	Animalia	Arthropoda	Insecta	Hymenoptera	Apidae	Apis	Apis mellifera	AGGTTGATTAAATTGGGATCTCCACCCTCCTATAGGATCAAAAAATGATGTATTAAAATTTCGATCAAATAATAGTATAGTAATTGCTCCAGCTAATACAGGTAATGATATAATTAATAAAATTGCTGTAATAAAAACTGATCATGGAAATAATGAAATTTGGTCATAATTTATAGAAAAATTTTTTATTATTATAATTGTAACTATTAAATTTAATGATCCTATAATTGAGGAAATTCCTGATATATGAAGAGAAAAAATTGCAAAATCTACTGAAGGTGAAGAATGATATAAATATGCTGATAATGGTGGATATACTGTTCATCCAGTTCCTGGTCTTGGGTAAAATAAATTTCTTAATAAAAGTATTAATAATGAGGGAGGAAGTAATCAAAATCT…
Run 5, Sample 83	LCO1490 + HCO2198			13	Animalia	Arthropoda	Insecta	Hymenoptera	Apidae	Apis	Apis mellifera	AAAAAATGTTGAAATTAAATTGGGATCTCCACCCTCCTATAGGATCAAAAAATGATGTATTAAAATTTCGATCAAATAATAGTATAGTAATTGCTCCAGCTAATACAGGTAATGATATAATTAATAAAATTGCTGTAATAAAAACTGATCATGGAAATAATGAAATTTGGTCATAATTTATAGAAAAATTTTTTATTATTATAATTGTAACTATTAAATTTAATGATCCTATAATTGAGGAAATTCCTGATATATGAAGAGAAAAAATTGCAAAATCTACTGAAGGTGAAGAATGATATAAATATGCTGATAATGGTGGATATACTGTTCATCCAGTTCCTGGTCTTGGGTAAAATAAATTTCTTAATAAAAGTATTAATAATGAGGGAGGAAGTAATC…
Run 4, Sample 51	LCO1490 + HCO2198	CTmin	-5.81	6.5	Animalia	Arthropoda	Insecta	Hymenoptera	Ichneumonidae	Campoletis	Campoletis horstmanni	AGGTTGAAATAAAATAGGGTCTCCACCTCCTGAGGGGTCAAAAAATGAAGTATTTAAATTACGATCTGTTAATAATATAGTGATAGCTCCTGCTAGTACTGGTACTGCTAGTAATAATAAAATTGTTGTAATTTTAATTGATCAAGTAAATAAAGTTAATTGTTCAAATTTTTTATTAATATTTTTTATATTAATAATTGTTGTAATAAAATTAATTGCACCTATAATTGATGATATACCTGCTATATGTAAAGAAAAAATTGATAGATCAACTGATATTCCTTCATGATTAATATTTAAAGATAGGGGAGGATATACAGTTCAACCTGTTCCTGCTCCTTGATTAATAATAGAACTAAAAATTATTAATAAAATTGAAGGAGGTAATAATCAAAATCT…
Run 4, Sample 23	LCO1490 + HCO2198	CTmin	-4.03	4	Animalia	Arthropoda	Insecta	Hymenoptera	Ichneumonidae		Campopleginae sp.	TAAATTCTCGATCTGTTAGTAGTATAGTAATAGCTCCAGCTAAAACTGGGACTGCTAATAAAAGTAAAATCGTTGTAATATTCAATTCGATCAAGTAAATAAAGTTATTTGTTCAAAATTTTTTTTATAATTTTTTATATTAAAAATAGTTGTAATAAAATTAATTGCTCCTATAATTGATGATATTCCTGCAAGATGAAGAGAAAAAATTGCTAAATCAACAGATATTCCTTCATGTCTAACATTTAAGGATAATGGTGGATAAACTGTTCATCCTGTTCCAACTCCTTGATTTGTAACTGATCTAAAAATTAAAAGTATTAAAGAAGGGGGTAATAATCAAAATCTTATATTATTTATTCGAGGGAATGCTATATCGGGTCTTCCTAATATTAGTGG…
Run 4, Sample 57	LCO1490 + HCO2198	CTmin	-6.21	5.8	Animalia	Arthropoda	Insecta	Hymenoptera	Ichneumonidae		Campopleginae sp.	AATTAAATAGGATCTCCCCCTCCTGATGGGTCAAAAAGGAGGTATTTAAATTTCGATCTGTTAGTAGTATAGTAATAGCTCCAGCTAAAACTGGGACTGCTAATAAAAGTAAAATTGTTGTAATATTAATTGATCAAGTAAATAAAGTTATTTGTTCAAAATTTTTTTTATAATTTTTTATATTAAAAATAGTTGTAATAAAATTAATTGCTCCTATAATTGATGATATTCCTGCAAGATGAAGAGAAAAAATTGCTAAATCAACAGATATTCCTTCATGTCTAACATTTAAGGATAATGGTGGATAAACTGTTCATCCTGTTCCAACTCCTTGATTTGTAACTGATCTAAAAATTAAAAGTATTAAAGAAGGGGGTAATAATCAAAATCTTATATTAT…
Run 6, Sample 106	LCO1490 + HCO2198	CTmax	43.37	5	Animalia	Arthropoda	Insecta	Hymenoptera	Ichneumonidae		Campopleginae sp.	GGTTGAAAAAATAGGATCTCCCCCTCCTGATGGGTCAAAAAGGAGGTATTTAAATTTCGATCTGTTAGTAGTATAGTAATAGCTCCAGCTAAAACTGGGACTGCTAATAAAAGTAAAATTGTTGTAATATTAATTGATCAAGTAAATAAAGTTATTTGTTCAAAATTTTTTTTATAATTTTTTATATTAAAAATAGTTGTAATAAAATTAATTGCTCCTATAATTGATGATATTCCTGCAAGATGAAAAGAAAAAATTGCTAAATCAACAGATATTCCTTCATGTCTAACATTTAATGATAATGGTGGATAAACTGTTCATCCTGTTCCAACTCCTTGATTTGTAACTGATCTAAAAATTAAAAGTATTAAAGAAGGGGGTAATAATCAAAATCTTATA…
Run 4, Sample 92	LCO1490 + HCO2198	CTmin	0.6	6	Animalia	Arthropoda	Insecta	Hymenoptera	Ichneumonidae		Ichneumonidae sp.	AAAGATTTGAATTAAATTGGGGTCTCCCCCCCCTGAGGGGTCAAAAATGATGTATTTAAATTACGATCTGTTAATAATATAGTGATAGCTCCGGCTAGTACTGGTACTGCTAGAAGAAGTAAGGTTGTAGTAGTTAAAATTGATCAACAAAATAATGGTAATTGTTCATAATTACAATCTATTGGGAATATATTTATAATTGTTGAGATAAAATTAATTGCTCCTATAATTGAAGATATACCTGCTATATGAAGAGAAAAAATTGATAGATCTACTGAAAGACCCTCATGGTTTAAGTTAAGAGATAAAGGAGGGTAAACTGTTCAGCCAGTTCCTATTCCTTGATTAATAATACTTCTATATAATAAAAATATAATTGATGGGGGCAATAATCAAAAT…	0.9
6.54p	LCO1490 + HCO2198	NA			Animalia	Arthropoda	Insecta	Hymenoptera	Dryinidae		Dryinidae sp.	AAAAGAATTGGGATCTCCACCCTCCTGCAGGGTCAAAAAATGAAGTATTAAAGTTACGATCTGATAATAGTATAGTAATAGCTCCTGCTAAAACTGGAAGTGAAAGTAATAATAAAATTGCAGTTAAAAGAATAGATCAAATAAATAAATTAATTTGATCTATATTTGATTTAATATGATATATATTTAAAATTGTTGCAATAAAATTTATAGCCCCTATAATTGAAGAAATTCCTGCAATATGTAAAGAAAAAATTGCTAAATCTACTGCAATTCTTCTATGAGAAATATTACCCGATAAAGGTGGATAAACTGTTCAACCTGTTCCAGCTCCTGATGAAATTAATCTTCTTAAGATTAAAAAAAATAAAGAAGGGGGAAGTAATCAAAATCTTATAT…
Run 1, Sample 52	LCO1490 + HCO2198	CTmax			Animalia	Arthropoda	Insecta	Hymenoptera			Hymenoptera sp.	AAGGGTGGGAAAGATGGGGGTCTCCTCCTCCTATTGGGTCATAAAATGATGTGTTTAAATTTCGGTCAAATAATAGTATAGTGATGCCTCCTGCTAATACAGGTAATGAAAGTAGTAAAAGAATTGTAGTTAATAAAATTGATCAAGTGAATAAGCTAATTTTATCTATTGATATTAAATTAGGTCGTATATTAAAAATGGTTGAAATAAAATTGATTGATCCTAAAATAGAAGAAATTCCTCTTAAATGAAGTGAGAAAATAACAAGGTCTGTTGAGATACCTGGGTGTCCAATATTTAGGGATAATGGGGGGTATACTGTTCAACCAGTCCCAGCCCCTTGATCAATAAATATTCTTGTAATTATTAAAATTAAAGATGGGATTAATAGTCAATATC…
Run 5, Sample 93	LCO1490 + HCO2198	CTmax	42.84	2.5	Animalia	Arthropoda	Insecta	Hymenoptera			Hymenoptera sp.	AAGGAATGGGGGTCTCCTCCTCCTATTGGGTCATAAAATGATGTGTTTAAATTTCGGTCAAATAATAGTATAGTGATGCCTCCTGCTAATACAGGTAATGAAAGTAGTAAAAGAATTGTAGTTAATAAAATTGATCAAGTGAATAATCTAATTTTATCTATTGATATTAAATTAGGTCGTATATTAAAAATGGTTGAAATAAAATTGATTGATCCTAAAATAGAAGAAATTCCTCTTAAATGAAGTGAGAAAATAACAAGGTCTGTTGAGATACCTGGGTGTCCAATATTTAGGGATAATGGGGGGTATACTGTTCAACCAGTCCCAGCCCCTTGATCAATAAATATTCTTGTAATTATTAAAATTAAAGATGGGATTAATAGTCAATATCTTATATTA…
Run 3, Sample 39	LCO1490 + HCO2198	CTmin	-3.88	5.8	Animalia	Arthropoda	Insecta	Hymenoptera	Ichneumonidae	Hyposoter	Hyposoter frigidus	GTTGAATTAAATTGGGATCTCCCCCTCCAGATGGGTCAAAAATGATGTATTTAAATTTCGATCTGTTAAGAGTATAGTAATAGCCCCAGCTAAAACTGGTACTGCTAATAAAAGTAAAATTGTTGTAATATTAATTGATCATGTAAATAAAGTTAATTGTTCTAAATTTTTATTATAATTTTTTATAATAAAAATAGTTGTAATAAAATTAATTGCTCCTATAATTGAAGATATCCCTGCAAGATGGAGAGAAAAAATAGCTAAATCAACAGATATTCCTTCATGACTAATATTTAAAGAGAGGGGAGGATAAACAGTTCATCCAGTTCCAACTCCTTGATTTGTAATTGATCTAAAAATTAATAATAATAGAGAAGGGGGTAATAATCAAAATCTTAT…
Run 3, Sample 50	LCO1490 + HCO2198	CTmin	-5.02	6.3	Animalia	Arthropoda	Insecta	Hymenoptera	Ichneumonidae	Hyposoter	Hyposoter frigidus	ATGGGCAAAAAATGATGTATTTAAATTTCGATCTGTTAAGAGTATAGTAATAGCCCCAGCTAAAACTGGTACTGCTAATAAAAGTAAAATTGTTGTAATATTAATTGATCATGTAAATAAAGTTAATTGTTCTAAATTTTTATTATAATTTTTTATAATAAAAATAGTTGTAATAAAATTAATTGCTCCTATAATTGAAGATATCCCTGCAAGATGGAGAGAAAAAATAGCTAAATCAACAGATATTCCTTCATGACTAATATTTAAAGAGAGGGGAGGATAAACAGTTCATCCAGTTCCAACTCCTTGATTTGTAATTGATCTAAAAATTAATAATAATAGAGAAGGGGGTAATAATCAAAATCTTATATTATTTATTCGAGGAAAGGCTATATCTGG…
Run 4, Sample 16	LCO1490 + HCO2198	CTmin		7	Animalia	Arthropoda	Insecta	Hymenoptera	Ichneumonidae	Hyposoter	Hyposoter frigidus	AGGTTGATTAAATTGGGATCTCCCCCTCCAGATGGGTCAAAAAATGATGTATTTAAATTTCGATCTGTTAAGAGTATAGTAATAGCCCCAGCTAAAACTGGTACTGCTAATAAAAGTAAAATTGTTGTAATATTAATTGATCATGTAAATAAAGTTAATTGTTCTAAATTTTTATTATAATTTTTTATAATAAAAATAGTTGTAATAAAATTAATTGCTCCTATAATTGAAGATATCCCTGCAAGATGGAGAGAAAAAATAGCTAAATCAACAGATATTCCTTCATGACTAATATTTAAAGAGAGGGGAGGATAAACAGTTCATCCAGTTCCAACTCCTTGATTTGTAATTGATCTAAAAATTAATAATAATAGAGAAGGGGGTAATAATCAAAATCTT…
Run 5, Sample 92	LCO1490 + HCO2198	CTmax		5	Animalia	Arthropoda	Insecta	Hymenoptera	Ichneumonidae	Hyposoter	Hyposoter frigidus	TTGAAATTAAATTGGGATCTCCCCCTCCAGATGGGTCAAAAATGATGTATTTAAATTTCGATCTGTTAAGAGTATAGTAATAGCCCCAGCTAAAACTGGTACTGCTAATAAAAGTAAAATTGTTGTAATATTAATTGATCATGTAAATAAAGTTAATTGTTCTAAATTTTTATTATAATTTTTTATAATAAAAATAGTTGTAATAAAATTAATTGCTCCTATAATTGAAGATATCCCTGCAAGATGGAGAGAAAAAATAGCTAAATCAACAGATATTCCTTCATGACTAATATTTAAAGAGAGGGGAGGATAAACAGTTCATCCAGTTCCAACTCCTTGATTTGTAATTGATCTAAAAATTAATAATAATAGAGAAGGGGGTAATAATCAAAATCTTAT…
Run 4, Sample 44	LCO1490 + HCO2198	CTmin	-5.05	9	Animalia	Arthropoda	Insecta	Hymenoptera	Ichneumonidae	Hyposoter	Hyposoter sp.	AACCCTTCCTCCACTTCCACCTCCTTGATTTGTAATTGATCTAAAAATTAATAATAAGGGAGAAGGGGGTAATAATCAAAATCTTATATTATTTATTCGAGGAAAGGCTATATCTGGTGCTCCTATTATTAAGGGAATTATTCAATTTCCAAATCCTCCAATTATAATTGGTATAACTATAAAAAAAATTATAATAAAAGCATGGGCTGTAACAAATGAATTATAAATTTGATCATTATTAATTAAATATCCTGGACTTCTTAATTCTATTCGAATAATTACTCTTATTGAAGAGCCAATTATTCCAGCTCATATTCCAAAAATGAAATATAAAATTCCAATATCTTTTATGATTTGTTGACCAA
Run 1, Sample 73	BR2 + BF3	CTmax	43.91	12	Animalia	Arthropoda	Insecta	Hymenoptera	Ichneumonidae	Ichneumon	Ichneumon sarcitorius	AAAAAAAAATGGTTTGGAATTATAAAATTGGGGTCTCCTCCTCCTGATGGGTCAAAAAATGAGGTATTTAAATTTCGATCGGTTAATAATATGGTAATTGCTCCAGCTAAAACTGGGACAGCTAATAATAATAGAATTGTTGTGATTAAAATTGATCATGTAAATAGGGTTAGTTGTTCAAATTTTATATTAATAGGGTATATATTTAAAATAGTTGTAATAAAATTAATAGCTCCCATGATTGATGAAATTCCTGCTATATGGAGTGAAAAAATTGATAAGTCAATTGATAATCCTTCATGATTTAAATTTAATGATAATGGGGGATAAACAGTTCATCCTGTTCCTGCACCTTGATTAGTTAATGATCTTATAATTAAAATAATAATTGAGGGGGGT…
Run 1, Sample 74	LCO1490 + HCO2198	CTmax	43.8	13	Animalia	Arthropoda	Insecta	Hymenoptera	Ichneumonidae	Ichneumon	Ichneumon sarcitorius	GGTTGAATAAAATTGGGGTCTCCTCCTCCTGATGGGTCAAAAAATGAGGTATTTAAATTTCGATCGGTTAATAATATGGTAATTGCTCCAGCTAAAACTGGGACAGCTAATAATAATAGAATTGTTGTGATTAAAATTGATCATGTAAATAGGGTTAGTTGTTCAAATTTTATATTAATAGGGTATATATTTAAAATAGTTGTAATAAAATTAATAGCTCCCATGATTGATGAAATTCCTGCTATATGGAGTGAAAAAATTGATAAGTCAATTGATAATCCTTCATGATTTAAATTTAATGATAATGGGGGATAAACAGTTCATCCTGTTCCTGCACCTTGATTAGTTAATGATCTTATAATTAAAATAATAATTGAGGGGGGTAATAATCAAAATCTT…
Run 2, Sample 10	LCO1490 + HCO2198	CTmin	-3.71	13	Animalia	Arthropoda	Insecta	Hymenoptera	Ichneumonidae	Ichneumon	Ichneumon sarcitorius	GTATAAATAGGATCTCCACCTCCCTGAGGGGTCAAAAATGAGGTATTTAAATTTCGATCAGTTAATAATATAGTGATTGCTCCTGCTAAAACTGGAACAGCTAATAATAATAAAATTGTTGTAATTAAAATTGATCAAGTAAATAATGTTAGTTGTTCAAATTTTATATTTATAGGATATATATTTAAAATAGTTGTAATAAAATTAATAGCTCCTATAATTGATGATATTCCTGCTATATGAAGTGAGAAAATTGATAAGTCAATTGATAATCCTTCATGATTTAAATTTAATGATAGTGGTGGGTAAACGGTTCATCCTGTTCCTGCACCTTGATTTGTTAATGATCCTATAATTAAAATTAAGATTGAAGGGGGTAATAATCAAAATCTTATATTA…
Run 2, Sample 79	LCO1490 + HCO2198	CTmin	-2.17	12	Animalia	Arthropoda	Insecta	Hymenoptera	Ichneumonidae	Ichneumon	Ichneumon sarcitorius	AAATAGGGATCTCCCCTCCCTGAGGGGTCAAAAATGAGGTATTTAAATTTCGATCAGTTAATAATATAGTGATTGCTCCTGCTAAAACTGGAACAGCTAATAATAATAAAATTGTTGTAATTAAAATTGATCAAGTAAATAATGTTAGTTGTTCAAATTTTATATTTATAGGATATATATTTAAAATAGTTGTAATAAAATTAATAGCTCCTATAATTGATGATATTCCTGCTATATGAAGTGAGAAAATTGATAAGTCAATTGATAATCCTTCATGATTTAAATTTAATGATAGTGGTGGGTAAACAGTTCATCCTGTTCCTGCACCTTGATTTGTTAATGATCCTATAATTAAAATTAAGATTGAAGGGGGTAATAATCAAAATCTTATATTATTTA…
Run 3, Sample 52	LCO1490 + HCO2198	CTmin	-5.03	13	Animalia	Arthropoda	Insecta	Hymenoptera	Ichneumonidae	Ichneumon	Ichneumon sarcitorius	GAGAGTCAAAAATGAGGTATTTAAATTTCGATCGGTTAATAATATGGTAATTGCTCCAGCTAAAACTGGGACAGCTAATAATAATAGAATTGTTGTGATTAAAATTGATCATGTAAATAGGGTTAGTTGTTCAAATTTTATATTAATAGGGTATATATTTAAAATAGTTGTAATAAAATTAATAGCTCCCATGATTGATGAAATTCCTGCTATATGGAGTGAAAAAATTGATAAGTCAATTGATAATCCTTCATGATTTAAATTTAATGATAATGGGGGATAAACAGTTCATCCTGTTCCTGCACCTTGATTAGTTAATGATCTTATAATTAAAATAATAATTGAGGGGGGTAATAATCAAAATCTTATATTATTTATTCGAGGGAAAGCTATATCAGG…
Run 4, Sample 63	BR2 + BF3	CTmin	-5.18	12	Animalia	Arthropoda	Insecta	Hymenoptera	Ichneumonidae	Ichneumon	Ichneumon sarcitorius	AAAATAAAGGGAATTCTCCCAACCCTCCCTGGAAGGGGTCAAAAAATGAGGTATTTAAATTTCGATCAGTTAATAATATAGTGATTGCTCCTGCTAAAACTGGAACAGCTAATAATAATAAAATTGTTGTAATTAAAATTGATCAAGTAAATAATGTTAGTTGTTCAAATTTTATATTTATAGGATATATATTTAAAATAGTTGTAATAAAATTAATAGCTCCTATAATTGATGATATTCCTGCTATATGAAGTGAGAAAATTGATAAGTCAATTGATAATCCTTCATGATTTAAATTTAATGATAGTGGTGGGTAAACAGTTCATCCTGTTCCTGCACCTTGATTTGTTAATGATCCTATAATTAAAATTAAGATTGAAGGGGGTAATAATCAAAATC…
Run 5, Sample 60	LCO1490 + HCO2198	CTmax	43.84	12	Animalia	Arthropoda	Insecta	Hymenoptera	Ichneumonidae	Ichneumon	Ichneumon sarcitorius	ATGTTGGTTAAATAGGGATCTCCACCTCCTGAGGGGTCAAAAATGAGGTATTTAAATTTCGATCAGTTAATAATATAGTGATTGCTCCTGCTAAAACTGGAACAGCTAATAATAATAAAATTGTTGTAATTAAAATTGATCAAGTAAATAATGTTAGTTGTTCAAATTTTATATTTATAGGATATATATTTAAAATAGTTGTAATAAAATTAATAGCTCCTATAATTGATGATATTCCTGCTATATGAAGTGAGAAAATTGATAAGTCAATTGATAATCCTTCATGATTTAAATTTAATGATAGTGGTGGGTAAACAGTTCATCCTGTTCCTGCACCTTGATTTGTTAATGATCCTATAATTAAAATTAAGATTGAAGGGGGTAATAATCAAAATCTTA…
Run 5, Sample 73	LCO1490 + HCO2198	CTmax	43.56	12	Animalia	Arthropoda	Insecta	Hymenoptera	Ichneumonidae	Ichneumon	Ichneumon sarcitorius	ATGTTGGTTAAATAGGATCTCCACCTCCTGAGGGGTCAAAAATGAGGTATTTAAATTTCGATCAGTTAATAATATAGTGATTGCTCCTGCTAAAACTGGAACAGCTAATAATAATAAAATTGTTGTAATTAAAATTGATCAAGTAAATAATGTTAGTTGTTCAAATTTTATATTTATAGGATATATATTTAAAATAGTTGTAATAAAATTAATAGCTCCTATAATTGATGATATTCCTGCTATATGAAGTGAGAAAATTGATAAGTCAATTGATAATCCTTCATGATTTAAATTTAATGATAGTGGTGGGTAAACAGTTCATCCTGTTCCTGCACCTTGATTTGTTAATGATCCTATAATTAAAATTAAGATTGAAGGGGGTAATAATCAAAATCTTAT…
Run 5, Sample 76	LCO1490 + HCO2198	CTmax	43.64	12	Animalia	Arthropoda	Insecta	Hymenoptera	Ichneumonidae	Ichneumon	Ichneumon sarcitorius	AGTTGAAATAAATTGGGGTCTCCTCCTCCTGATGGGTCAAAAATGAGGTATTTAAATTTCGATCGGTTAATAATATGGTAATTGCTCCAGCTAAAACTGGGACAGCTAATAATAATAGAATTGTTGTGATTAAAATTGATCATGTAAATAGGGTTAGTTGTTCAAATTTTATATTAATAGGGTATATATTTAAAATAGTTGTAATAAAATTAATAGCTCCCATGATTGATGAAATTCCTGCTATATGGAGTGAAAAAATTGATAAGTCAATTGATAATCCTTCATGATTTAAATTTAATGATAATGGGGGATAAACAGTTCATCCTGTTCCTGCACCTTGATTAGTTAATGATCTTATAATTAAAATAATAATTGAGGGGGGTAATAATCAAAATCTTA…
Run 4, Sample 10	LCO1490 + HCO2198	CTmin	-3.81	5	Animalia	Arthropoda	Insecta	Hymenoptera	Ichneumonidae		Ichneumonidae sp.	ATAAATTTGGGATCTCCACCTCCTGATGGTTCAAAAAAGATGTATTCAAATTTCGATCAGTTAAAAGTATAGTGATAGCTCCGGCTAAAACTGGTACAGCTAATAAAAGTAGAATTGCTGTAATTATAATAGATCATGAAAATAAAGATTTTTTTTCTAAAGTTAATATATTAGGTCGCAAATTAATAATTGTTGTAATAAAGTTAATTGCTCCTATAATTGATGATATACCTGCTAAGTGTAAAGAAAAAATTGCTAAATCTAATGATATCCCTTCATGATTTAAATTTGAAGATAATGGAGGGTATACTGTTCACCCTGTCCCAACTCCTTGATTAATAATTCTTCTTATAATCAATATAATAATAGAAGGAGGTAATAATCAAAATCTTATATTAT…
Run 4, Sample 34	BR2 + BF3	CTmin	-3.15	5	Animalia	Arthropoda	Insecta	Hymenoptera	Ichneumonidae		Ichneumonidae sp.	TACCTGGATTGGGTTCAAAAAAAGATGTATTCAAATTTCGATCAGTTAAAAGTATAGTGATAGCTCCGGCTAAAACTGGTACAGCTAATAAAAGTAGAATTGCTGTAATTATAATAGATCATGAAAATAAAGATATTTTTTCTAAAGTTAATATATTAGGTCGCATATTAATAATTGTTGTAATAAAGTTAATTGCTCCTATAATTGATGATATACCTGCTAAGTGTAAAGAAAAAATTGCTAAATCTAATGATATCCCTTCATGATTTAAATTTGAAGATAATGGAGGGTATACTGTTCACCCTGTCCCAACTCCTTGATTAATAATTCTTCTTATAATCAATATAATAATAGAAGGAGGTAATAATCAAAATCTTATATTATTTATTCGGGGAAAGG…
Run 4, Sample 76	LCO1490 + HCO2198	CTmin	-4.78	5.5	Animalia	Arthropoda	Insecta	Hymenoptera	Ichneumonidae		Ichneumonidae sp.	AAGTTGATTAAATTGGGGTCTCCTCCCCCTGATGGTTCAAAAAAAGATGTATTTAAATTTCGATCAGTTAAAAGTATAGTGATGGCTCCGGCTAAAACTGGTACAGCTAATAAAAGTAAAATTGCTGTAATTATAATAGATCATGAAAATAAAGATATTTTTTCTAAAGTTAATATATTAGGTCGTATATTAATAATTGTTGTAATAAAGTTAATTGCTCCTATAATTGATGATATACCTGCTAAATGTAAAGAGAAAATTGCTAAATCTAATGATATTCCTTCATGATTTAAATTTGAAGATAATGGAGGGTATACTGTTCACCCTGTCCCAACTCCTTGATTAATAATTCTTCTTATAATTAATATAATAATAGAAGGAGGTAATAATCAAAATCTT…
Run 5, Sample 95	LCO1490 + HCO2198	CTmax	41.86	4.9	Animalia	Arthropoda	Insecta	Hymenoptera	Ichneumonidae		Ichneumonidae sp.	AAAAATGTTGAAATTAAATTGGGGTCTCCTCCCCCTGATGGTTCAAAAAAAGATGTATTTAAATTTCGATCAGTTAAAAGTATAGTGATGGCTCCGGCTAAAACTGGTACAGCTAATAAAAGTAAAATTGCTGTAATTATAATAGATCATGAAAATAAAGATATTTTTTCTAAAGTTAATATATTAGGTCGTATATTAATAATTGTTGTAATAAAGTTAATTGCTCCTATAATTGATGATATACCTGCTAAATGTAAAGAGAAAATTGCTAAATCTAATGATATTCCTTCATGATTTAAATTTGAAGATAATGGAGGGTATACTGTTCACCCTGTCCCAACTCCTTGATTAATAATTCTTCTTATAATTAATATAATAATAGAAGGAGGTAATAATCAA…
Run 5, Sample 53	LCO1490 + HCO2198	CTmax	42.35	5	Animalia	Arthropoda	Insecta	Hymenoptera	Ichneumonidae		Ichneumonidae sp.	AAAATGTTGAATAAATTGGGATCTCCACCTCCTGATGGTTCAAAAAAGATGTATTCAAATTTCGATCAGTTAAAAGTATAGTGATAGCTCCGGCTAAAACTGGTACAGCTAATAAAAGTAGAATTGCTGTAATTATAATAGATCATGAAAATAAAGATATTTTTTCTAAAGTTAATATATTAGGTCGCATATTAATAATTGTTGTAATAAAGTTAATTGCTCCTATAATTGATGATATACCTGCTAAGTGTAAAGAAAAAATTGCTAAATCTAATGATATCCCTTCATGATTTAAATTTGAAGATAATGGAGGGTATACTGTTCACCCTGTCCCAACTCCTTGATTAATAATTCTTCTTATAATCAATATAATAATAGAAGGAGGTAATAATCAAAATC…
Run 3, Sample 19	BR2 + BF3	CTmin	-4.71	4	Animalia	Arthropoda	Insecta	Hymenoptera	Braconidae	Meteorus	Meteorus rubens	AAAATAATGGTTGGGTATAAAATGGGGATCCCCCCCTCCTGCAGGATCAAAAAAAGAAGTATTTAAATTACGATCTGTCAAAAGTATTGTAATAGCACCAGCTAAAACAGGTAAAGCTAATAATAACAAAACTCCAGTAATTAATACAGATCAAATAAATAAACTAAGATTATCTATTTTTAATCCTATTAAATGTATATTAAAAATTGTAGTAATAAAATTAATAGCCCCTATAATAGAAGAAGCTCCCGCTAAATGTAATGAAAAAATTGCTATATCTACAGATATCCCCCCATGTCTAACATTTAAAGATAATGGAGGGTAAACAGTTCACCCTGTTCCTGCTCCTATATTAACTATTCTTCTTAATAACAATATTAATATTGAAGGAATTAATAA…
Run 2, Sample 68	LCO1490 + HCO2198	CTmin	-2.3	4.5	Animalia	Arthropoda	Insecta	Hymenoptera	Ichneumonidae	Pantisarthrus	Pantisarthrus lubricus	GTTGGGTTATAATTGGGTCCCCCCTCCAGATGGGTCAAAGAATGATGTATTTAAATTTCGATCAGTAAGTAATATAGTAATTGCGCCGGCTAATACTGGTACAGCAAGTAAGAGTAAAATTGCAGTAATTTTAATAGATCAGGTAAATAGTGATATTTTATCAAGTGAAATATGGTTGGGGCGTATATTTATAATGGTTGTAATAAAATTAATTGCCCCTATGATTGAGGATATACCTGCTATATGTAAAGAAAAAATTGCGCAATCTACAGCTAATCCTTCATGATTTAAATTTAATGATAAAGGGGGATAAACTGTTCATCCTGTTCCTGCACCTTGATTAAAAATTCCACTAAGTAGAAGTAATATCATAGAAGGGGGTAATAATCAAAAACTTAT…
Run 4, Sample 87	LCO1490 + HCO2198	CTmin		5	Animalia	Arthropoda	Insecta	Hymenoptera	Ichneumonidae	Pantisarthrus	Pantisarthrus lubricus	AAAAATGTTGGTTAAATTGGGGTCCCCCCTCCAGATGGGTCAAAGAATGATGTATTTAAATTTCGATCAGTAAGTAATATAGTAATTGCGCCGGCTAATACTGGTACAGCAAGTAAGAGTAAAATTGCAGTAATTTTAATAGATCAGGTAAATAGTGATATTTTATCAAGTGAAATATGGTTGGGGCGTATATTTATAATGGTTGTAATAAAATTAATTGCCCCTATGATTGAGGATATACCTGCTATATGTAAAGAAAAAATTGCGCAATCTACAGCTAATCCTTCATGATTTAAATTTAATGATAAAGGGGGATAAACTGTTCATCCTGTTCCTGCACCTTGATTAAGAATTCCACTAAGTAGAAGTAATATCATAGAAGGGGGTAATAATCAAAAA…
Run 4, Sample 108	LCO1490 + HCO2198	CTmin	-1.23	2.5	Animalia	Arthropoda	Insecta	Hymenoptera	Braconidae		Brachonidae sp.	TAAAAGGGTGAATAAATTGGGATCCCCTCCACCTGAAAAATCAAAAAAAGTTGTATTTAAATTACGATCAGTTAATAATATAGTAATTGCCCCAGCTAATACAGGTAAAGACAACAATAATAATACTGCTGTAATTAAAATAGATCAAACAAATAACCTTAATTGTTCTCATTTAATTATATAAAATTTTATATTAAAAATTGTTGTTAAAAAATTAATTACTCCTATAATTGAAGATACCCCAGCTAAATGTAATGAAAAAATAGCTAAATCAACTGAAATCCCTCTATGACCAATTCTTGAAGATAAAGGGGGATAAATAGTTCATCCAGTTCCAACCCCAATATTTAATAAACCCCTTAATAATAATAATAAAAGTGAAGGAATCAATAATCAAAA…	0.93
Run 5, Sample 116	LCO1490 + HCO2198	CTmax	42.95	4.3	Animalia	Arthropoda	Insecta	Hymenoptera	Tenthredinidae	Pristiphora	Tenthredinidae sp.	AAAAAGGGTTGGGTTTAAATTGGGGTCTCCTCCTCCTGAAGGGTCAAAAAAAGATGTATTTAAATTACGATCTGTAAGTAATATTGTAATAGCTCCTGCTAAAACTGGTAAAGATAATAATAGTAATAATGCAGTTAATGATACTGCTCAAATAAATAGTGGTATTTGTTCAAATTTTATTCCTTTTACTTTTATGTTAAATATTGTTGAAATAAAATTAATTGCTCCTAGGATAGATGAAATACCAGCTAAATGTAATGAAAAAATTGTTAAATCTACTGATGCACCTGAATGAGAAATTCTTCTAGATAAAGGAGGATAAACTGTTCATCCTGTACCTGAACCTGAATTTACTATTCTTCTTGAAAGTAATAAAATTAATGATGGTGGTAAAAATCA…
Run 5, Sample 119	LCO1490 + HCO2198	CTmax	42.98	4.6	Animalia	Arthropoda	Insecta	Hymenoptera	Tenthredinidae	Pristiphora	Tenthredinidae sp.	GTGGGTTAAAATTGGGGTCTCCTCCTCCTGAAGGGTCAAAAAAAGATGTATTTAAATTACGATCTGTAAGTAATATTGTAATAGCTCCTGCTAAAACTGGTAAAGATAATAATAGTAATAATGCAGTTAATGATACTGCTCAAATAAATAGTGGTATTTGTTCAAATTTTATTCCTTTTACTTTTATGTTAAATATTGTTGAAATAAAATTAATTGCTCCTAGGATAGATGAAATACCAGCTAAATGTAATGAAAAAATTGTTAAATCTACTGATGCACCTGAATGAGAAATTCTTCTAGATAAAGGAGGATAAACTGTTCATCCTGTACCTGAACCTGAATTTACTATTCTTCTTGAAAGTAATAAAATTAATGATGGTGGTAAAAATCAAAATCTTA…
Run 5, Sample 2	LCO1490 + HCO2198	CTmax	45.12	4.6	Animalia	Arthropoda	Insecta	Hymenoptera	Tenthredinidae	Pristiphora	Tenthredinidae sp.	AAAAAGTGTTGGGTTAAATTGGGGTCTCCTCCTCCTGAAGGGTCAAAAAAAGATGTATTTAAATTACGATCTGTAAGTAATATTGTAATAGCTCCTGCTAAAACTGGTAAAGATAATAATAGTAATAATGCAGTTAATGATACTGCTCAAATAAATAGTGGTATTTGTTCAAATTTTATTCCTTTTACTTTTATGTTAAATATTGTTGAAATAAAATTAATTGCTCCTAGGATAGATGAAATACCAGCTAAATGTAATGAAAAAATTGTTAAATCTACTGATGCACCTGAATGAGAAATTCTTCTAGATAAAGGAGGATAAACTGTTCATCCTGTACCTGAACCTGAATTTACTATTCTTCTTGAAAGTAATAAAATTAATGATGGTGGTAAAAATCAA…
Run 5, Sample 34	LCO1490 + HCO2198	CTmax	43.69	6	Animalia	Arthropoda	Insecta	Hymenoptera	Tenthredinidae	Pristiphora	Tenthredinidae sp.	AAAAATTGAGGTCTCCTCCCTCCCTGAAGGGTCAAAAAAAGATGTATTTAAATTACGATCTGTAAGTAATATTGTAATAGCTCCTGCTAAAACTGGTAAAGATAATAATAGTAATAATGCAGTTAATGATACTGCTCAAATAAATAGTGGTATTTGTTCAAATTTTATTCCTTTTACTTTTATGTTAAATATTGTTGAAATAAAATTAATTGCTCCTAGGATAGATGAAATACCAGCTAAATGTAATGAAAAAATTGTTAAATCTACTGATGCACCTGAATGAGAAATTCTTCTAGATAAAGGAGGATAAACTGTTCATCCTGTACCTGAACCTGAATTTACTATTCTTCTTGAAAGTAATAAAATTAATGATGGTGGTAAAAATCAAAATCTTATATT…
Run 5, Sample 51	BR2 + BF3	CTmax	44.1	5	Animalia	Arthropoda	Insecta	Hymenoptera	Tenthredinidae	Pristiphora	Tenthredinidae sp.	ATAAAATAAGTGGTTGGGTTATAAAATTTGGGGTCTCCTCCTCCTGAAGGGTCAAAAAAAGATGTATTTAAATTACGATCTGTAAGTAATATTGTAATAGCTCCTGCTAAAACTGGTAAAGATAATAATAGTAATAATGCAGTTAATGATACTGCTCAAATAAATAGTGGTATTTGTTCAAATTTTATTCCTTTTACTTTTATGTTAAATATTGTTGAAATAAAATTAATTGCTCCTAGGATAGATGAAATACCAGCTAAATGTAATGAAAAAATTGTTAAATCTACTGATGCACCTGAATGAGAAATTCTTCTAGATAAAGGAGGATAAACTGTTCATCCTGTACCTGAACCTGAATTTACTATTCTTCTTGAAAGTAATAAAATTAATGATGGTGGT…	97.95 %
Run 5, Sample 6	LCO1490 + HCO2198	CTmax	42.78	4.8	Animalia	Arthropoda	Insecta	Hymenoptera	Tenthredinidae	Pristiphora	Tenthredinidae sp.	AAAAAGTGTTGGGTAAAATTGGGGTCTCCTCCTCCTGAAGGGTCAAAAAAAGATGTATTTAAATTACGATCTGTAAGTAATATTGTAATAGCTCCTGCTAAAACTGGTAAAGATAATAATAGTAATAATGCAGTTAATGATACTGCTCAAATAAATAGTGGTATTTGTTCAAATTTTATTCCTTTTACTTTTATGTTAAATATTGTTGAAATAAAATTAATTGCTCCTAGGATAGATGAAATACCAGCTAAATGTAATGAAAAAATTGTTAAATCTACTGATGCACCTGAATGAGAAATTCTTCTAGATAAAGGAGGATAAACTGTTCATCCTGTACCTGAACCTGAATTTACTATTCTTCTTGAAAGTAATAAAATTAATGATGGTGGTAAAAATCAA…
Run 6, Sample 29	LCO1490 + HCO2198	CTmax	44.37	8	Animalia	Arthropoda	Insecta	Hymenoptera	Tenthredinidae	Pristiphora	Tenthredinidae sp.	TGTGGGTATAAATTGGGGTCTCCTCCTCCTGAAGGGTCAAAAAAGATGTATTTAAATTACGATCTGTAAGTAATATTGTAATAGCTCCTGCTAAAACTGGTAAAGATAATAATAGTAATAATGCAGTTAATGATACTGCTCAAATAAATAGTGGTATTTGTTCAAATTTTATTCCTTTTACTTTTATGTTAAATATTGTTGAAATAAAATTAATTGCTCCTAGGATAGATGAAATACCAGCTAAATGTAATGAAAAAATTGTTAAATCTACTGATGCACCTGAATGAGAAATTCTTCTAGATAAAGGAGGATAAACTGTTCATCCTGTACCTGAACCTGAATTTACTATTCTTCTTGAAAGTAATAAAATTAATGATGGTGGTAAAAATCAAAATCTTA…
Run 3, Sample 109	BR2 + BF3	CTmin	-4.69	4	Animalia	Arthropoda	Insecta	Hymenoptera	Tenthredinidae	Pristiphora	Tenthredinidae sp.	GTTCTCCTTCCCTTCCTTGAAGGGTTCAAAAAAAGATGTATTTAAATTACGATCTGTAAGTAATATTGTAATAGCTCCTGCTAAAACTGGTAAAGATAATAATAGTAATAATGCAGTTAATGATACTGCTCAAATAAATAGTGGTATTTGTTCAAATTTTATTCCTTTTACTTTTATGTTAAATATTGTTGAAATAAAATTAATTGCTCCTAGGATAGATGAAATACCAGCTAAATGTAATGAAAAAATTGTTAAATCTACTGATGCACCTGAATGAGAAATTCTTCTAGATAAAGGAGGATAAACTGTTCATCCTGTACCTGAACCTGAATTTACTATTCTTCTTGAAAGTAATAAAATTAATGATGGTGGTAAAAATCAAAATCTTATATTATTTAA…
Run 4, Sample 46	BR2 + BF3	CTmin		5.5	Animalia	Arthropoda	Insecta	Hymenoptera	Tenthredinidae	Pristiphora	Tenthredinidae sp.	GGGTTATAATATTTGGGGTCTCCCTCCCTCCTGAAGGGTCAAAAAAAGATGTATTTAAATTACGATCTGTAAGTAATATTGTAATAGCTCCTGCTAAAACTGGTAAAGATAATAATAGTAATAATGCAGTTAATGATACTGCTCAAATAAATAGTGGTATTTGTTCAAATTTTATTCCTTTTACTTTTATGTTAAATATTGTTGAAATAAAATTAATTGCTCCTAGGATAGATGAAATACCAGCTAAATGTAATGAAAAAATTGTTAAATCTACTGATGCACCTGAATGAGAAATTCTTCTAGATAAAGGAGGATAAACTGTTCATCCTGTACCTGAACCTGAATTTACTATTCTTCTTGAAAGTAATAAAATTAATGATGGTGGTAAAAATCAAAATC…	97.92 %
Run 4, Sample 85	LCO1490 + HCO2198	CTmin	-3.87	4	Animalia	Arthropoda	Insecta	Hymenoptera	Braconidae	Protapanteles	Protapanteles fulvipes	AAAATGTTGATAAGAATTGGGATCCCACCTCCAGAAGGATCAAAAAATCTTGTATTTATATTACGATCAGTTAACAATATAGTAATTGCACCAGCCAAAACTGGTAAAGATAATAATAATAAAATAACAGTAATAAAAATAGATCAAGAAAATAAAGATATTTTATCTATTTTAAATAAATTTGTTCGTATATTTATGATTGTAGTAATAAAATTTACTGCACCTATAATTGATGAAGCACCAGCTAAATGTAAAGAAAAAATTCCTAAATCCACTGATATTCCACCATGACCTAAAATTAATGATAAAGGAGGATAAATAGTTCAACCTGTACCAACACCAACATTAATAAATCCACTTATAATTAATATAAATAATGAAGGAATTAATAATCAAAAA…
Run 5, Sample 32	LCO1490 + HCO2198	CTmax	40.44	3.2	Animalia	Arthropoda	Insecta	Hymenoptera	Braconidae	Protapanteles	Protapanteles fulvipes	AATGTTGATAAGAATTGGGATCACCACCTCCAGAAGGATCAAAAAATCTTGTATTTATATTACGATCAGTTAACAATATAGTAATTGCACCAGCCAAAACTGGTAAAGATAATAATAATAAAATAACAGTAATAAAAATAGATCAAGAAAATAAAGATATTTTATCTATTTTAAATAAATTTGTTCGTATATTTATGATTGTAGTAATAAAATTTACTGCACCTATAATTGATGAAGCACCAGCTAAATGTAAAGAAAAAATTCCTAAATCCACTGATATTCCACCATGACCTAAAATTAATGATAAAGGAGGATAAATAGTTCAACCTGTACCAACACCAACATTAATAAATCCACTTATAATTAATATAAATAATGAAGGAATTAATAATCAAAAAC…
Run 2, Sample 75	BR2 + BF3			12	Animalia	Arthropoda	Insecta	Hymenoptera	Vespidae	Vespula	Vespula rufa	GATTTCATTTTCGATCAGTTAAAAGTATAGTAATTGCTCCTGCTAAAACAGGTAAAGAAAGAAGAAGAAGAATTGCTGTAATTAAAATTGATCATGTAAATAATGGAAGAAAATTTAATGAATGAGTTTTTGTATGTATATTTAAAATAGTAACAATAAAATTAATTGATCCTATAATAGAAGAAATTCCAGCTATATGAATAGAAAAAATTCTTAAGTCAATTGAAGGTGAATCATGGCCAGTAATAGAAGATAAAGGAGGATAAAGAGTTCATCCAGTTCCAGTTCCTGATCCAATAAAATTTCTTAAAATTAAGAGAAATAATGATGGTGGAAGAATTCAGAATCTTATATTATTTATTCGGGGAAAGGCTATGT
Run 5, Sample 131	LCO1490 + HCO2198			12	Animalia	Arthropoda	Insecta	Hymenoptera	Vespidae	Vespula	Vespula rufa	TAGGGTCACCTCCCTCCCTGCAGGATCAAAGAATGATGTATTTAAATTTCGATCAGTTAAAAGTATAGTAATTGCTCCTGCTAAAACAGGTAAAGAAAGAAAAAAAAAAATTGCTGTAATTAAAATTGATCATGTAAATAATGGAAGAAAATTTAATGAATGAGTTTTTGTATGTATATTTAAAATAGTAACAATAAAATTAATTGATCCTATAATAAAAGAAATTCCAGCTATATGAATAAAAAAAATTCTTAAGTCAATTGAAGGTGAATCATGGCCAGTAATAGAAGATAAAGGAGGATAAAGAGTTCATCCAGTTCCAGTTCCTGATCCAATAAAATTTCTTAAAATTAAGAGAAATAATGATGGGGGAAGAATTCAAAATCTTATATTATTTAT…
Run 5, Sample 24	LCO1490 + HCO2198	CTmax	42.88	7	Animalia	Arthropoda	Insecta	Lepidoptera	Tortricidae	Acleris	Acleris caryosphena	AAAAAGTTGAAATAAATTGGGATCTCCTCCTCCAGCCGGATCAAAAATGAGGTATTTAAATTTCGATCTGTTAATAATATAGTAATAGCACCGGCTAATACAGGTAAAGATAATAGTAATAATAAAGCTGTAATTCCTACAGCTCATACAAATAATGGTATTTGATCTAATGATATATTATTAGGTCGTATATTGATAATCGTGGTAATAAAATTTACAGCTCCTAAAATAGATGAAATACCAGCTAAATGTAAAGAAAAAATAGCTAAATCAACAGAACTACCACTATGGGCAATATTAGATGAAAGGGGGGGGTAAACCGTTCATCCTGTTCCTGCTCCATTTTCTACAATTCTTCTTGAAATTAAAAGTATAATAGAAGGTGGTAATAACCAAAAA…
Run 3, Sample 43	LCO1490 + HCO2198	CTmin	-0.3		Animalia	Arthropoda	Insecta	Lepidoptera	Noctuidae	Autographa	Autographa gamma	TATAAGGAATTGGGGTCTCCTCCTCCAGCAGGATCAAAAAAAGAAGTATTTAAATTACGATCTGTTAAAAGTATAGTAATTGCCCCTGCTAAAACAGGTAAAGAAAGTAATAAAAGGAAAGCTGTAATTCCAACAGCTCAGATAAATAAAGGTATTTGATCAAAAGATAAACTATTTAATCGTATATTAATAATTGTTGTAATAAAATTAATTGCTCCTAAAATTGATGAAATTCCAGCTAAATGTAAAGAAAAAATAGCTAAATCAACAGATCTTCCACCATGGGCGATATTAGATGAAAGTGGGGGATAAACTGTTCATCCAGTACCAGCTCCATTTTCTACAATTCTTCTAGAAATTAAAAGAGTTAAAGATGGGGGTAAAAGTCAAAAACTTATG…
Run 6, Sample 4	LCO1490 + HCO2198	CTmax	46.06	15.5	Animalia	Arthropoda	Insecta	Lepidoptera	Noctuidae	Autographa	Autographa gamma	AGGTGGGTATAGAATTGGGGTCTCCTCCTCCAGCAGGATCAAAAAAAGAAGTATTTAAATTACGATCTGTTAAAAGTATAGTAATTGCCCCTGCTAAAACAGGTAAAGAAAGTAATAAAAGGAAAGCTGTAATTCCAACAGCTCAGATAAATAAAGGTATTTGATCAAAAGATAAACTATTTAATCGTATATTAATAATTGTTGTAATAAAATTAATTGCTCCTAAAATTGATGAAATTCCAGCTAAATGTAAAGAAAAAATAGCTAAATCAACAGATCTTCCACCATGGGCGATATTAGATGAAAGTGGGGGATAAACTGTTCATCCAGTACCAGCTCCATTTTCTACAATTCTTCTAGAAATTAAAAGAGTTAAAGATGGGGGTAAAAGTCAAAAAC…
Run 1, Sample 24	LCO1490 + HCO2198	CTmax	37.72	7.1	Animalia	Arthropoda	Insecta	Lepidoptera	Tortricidae		Tortricidae sp.	GGTGGATTAAATAAGAATCACCTCCACCAGCAGGGTCAAAGAATGAAGTATTTAAATTTCGATCTGTTAATAATATAGTAATAGCTCCTGCTAATACAGGTAAAGATAATAATAATAAAAGGGCTGTAATACCTACTGATCAAACAAATAAAGGTATTTGATCTAAGGATATATTATTAGGTCGTATATTAATAATTGTTGTAATAAAGTTTACTGCTCCTAAAATAGAGGAAATACCTGCCAAATGAAGTGAAAAAATTGCAAGATCGACTGATCTTCCTCTATGAGCAATATTTGATGAAAGTGGGGGGTAAACTGTTCATCCTGTTCCTGCTCCATTTTCCACAATTCTTCTAGAAATTAATAGTATAATAGATGGGGGTAATAATCAAAATCTTA…
Run 1, Sample 76	LCO1490 + HCO2198	CTmax	43.69	7.5	Animalia	Arthropoda	Insecta	Lepidoptera	Tortricidae		Tortricidae sp.	AAAAGGTTGATTAAATAGGGATCACCTCCACCAGCAGGGTCAAAGAATGAAGTATTTAAATTTCGATCTGTTAATAATATAGTAATAGCTCCTGCTAATACAGGTAAAGATAATAATAATAAAAGGGCTGTAATACCTACTGATCAAACAAATAAAGGTATTTGATCTAAGGATATATTATTAGGTCGTATATTAATAATTGTTGTAATAAAGTTTACTGCTCCTAAAATAGAGGAAATACCTGCCAAATGAAGTGAAAAAATTGCAAGATCGACTGATCTTCCTCTATGAGCAATATTTGATGAAAGTGGGGGGTAAACTGTTCATCCTGTTCCTGCTCCATTTTCCACAATTCTTCTAGAAATTAATAGTATAATAGATGGGGGTAATAATCAAAAT…
Run 1, Sample 77	LCO1490 + HCO2198	CTmax	45.12	7.2	Animalia	Arthropoda	Insecta	Lepidoptera	Tortricidae		Tortricidae sp.	AGGTGGATTAAATAGGGATCACCTCCACCAGCAGGGTCAAAGAATGAAGTATTTAAATTTCGATCTGTTAATAATATAGTAATAGCTCCTGCTAATACAGGTAAAGATAATAATAATAAAAGGGCTGTAATACCTACTGATCAAACAAATAAAGGTATTTGATCTAAGGATATATTATTAGGTCGTATATTAATAATTGTTGTAATAAAGTTTACTGCTCCTAAAATAGAGGAAATACCTGCCAAATGAAGTGAAAAAATTGCAAGATCGACTGATCTTCCTCTATGAGCAATATTTGATGAAAGTGGGGGGTAAACTGTTCATCCTGTTCCTGCTCCATTTTCCACAATTCTTCTAGAAATTAATAGTATAATAGATGGGGGTAATAATCAAAATCTT…
Run 1, Sample 78	LCO1490 + HCO2198	CTmax	42.83	6	Animalia	Arthropoda	Insecta	Lepidoptera	Tortricidae		Tortricidae sp.	TGGAATAAATAGGGATCACCTCCACCAGCAGGGTCAAAGAATGAAGTATTTAAATTTCGATCTGTTAATAATATAGTAATAGCTCCTGCTAATACAGGTAAAGATAATAATAATAAAAGGGCTGTAATACCTACTGATCAAACAAATAAAGGTATTTGATCTAAGGATATATTATTAGGTCGTATATTAATAATTGTTGTAATAAAGTTTACTGCTCCTAAAATAGAGGAAATACCTGCCAAATGAAGTGAAAAAATTGCAAGATCGACTGATCTTCCTCTATGAGCAATATTTGATGAAAGTGGGGGGTAAACTGTTCATCCTGTTCCTGCTCCATTTTCCACAATTCTTCTAGAAATTAATAGTATAATAGATGGGGGTAATAATCAAAATCTTATA…
Run 1, Sample 8	LCO1490 + HCO2198	CTmax	44.39	7	Animalia	Arthropoda	Insecta	Lepidoptera	Tortricidae		Tortricidae sp.	AAATGTTGATTAAATAGAATCACCTCCACCAGCAGGGTCAAAGAATGAAGTATTTAAATTTCGATCTGTTAATAATATAGTAATAGCTCCTGCTAATACAGGTAAAGATAATAATAATAAAAGGGCTGTAATACCTACTGATCAAACAAATAAAGGTATTTGATCTAAGGATATATTATTAGGTCGTATATTAATAATTGTTGTAATAAAGTTTACTGCTCCTAAAATAGAGGAAATACCTGCCAAATGAAGTGAAAAAATTGCAAGATCGACTGATCTTCCTCTATGAGCAATATTTGATGAAAGTGGGGGGTAAACTGTTCATCCTGTTCCTGCTCCATTTTCCACAATTCTTCTAGAAATTAATAGTATAATAGATGGGGGTAATAATCAAAATCT…
Run 1, Sample 81	LCO1490 + HCO2198	CTmax	43.64	7	Animalia	Arthropoda	Insecta	Lepidoptera	Tortricidae		Tortricidae sp.	AAGGTTGAATAAATAGGGATCACCTCCACCAGCAGGGTCAAAGAATGAAGTATTTAAATTTCGATCTGTTAATAATATAGTAATAGCTCCTGCTAATACAGGTAAAGATAATAATAATAAAAGGGCTGTAATACCTACTGATCAAACAAATAAAGGTATTTGATCTAAGGATATATTATTAGGTCGTATATTAATAATTGTTGTAATAAAGTTTACTGCTCCTAAAATAGAGGAAATACCTGCCAAATGAAGTGAAAAAATTGCAAGATCGACTGATCTTCCTCTATGAGCAATATTTGATGAAAGTGGGGGGTAAACTGTTCATCCTGTTCCTGCTCCATTTTCCACAATTCTTCTAGAAATTAATAGTATAATAGATGGGGGTAATAATCAAAATCT…
Run 1, Sample 87	LCO1490 + HCO2198	CTmax	41.07	8	Animalia	Arthropoda	Insecta	Lepidoptera	Tortricidae		Tortricidae sp.	TGTGGATTAAATAGGGATCACCTCCACCAGCAGGGTCAAAGAATGAAGTATTTAAATTTCGATCTGTTAATAATATAGTAATAGCTCCTGCTAATACAGGTAAAGATAATAATAATAAAAGGGCTGTAATACCTACTGATCAAACAAATAAAGGTATTTGATCTAAGGATATATTATTAGGTCGTATATTAATAATTGTTGTAATAAAGTTTACTGCTCCTAAAATAGAGGAAATACCTGCCAAATGAAGTGAAAAAATTGCAAGATCGACTGATCTTCCTCTATGAGCAATATTTGATGAAAGTGGGGGGTAAACTGTTCATCCTGTTCCTGCTCCATTTTCCACAATTCTTCTAGAAATTAATAGTATAATAGATGGGGGTAATAATCAAAATCTTA…
Run 1, Sample 9	LCO1490 + HCO2198	CTmax	43.96	6	Animalia	Arthropoda	Insecta	Lepidoptera	Tortricidae		Tortricidae sp.	GTTGATTAAATAGGGATCACCTCCACCAGCAGGGTCAAAGAATGAAGTATTTAAATTTCGATCTGTTAATAATATAGTAATAGCTCCTGCTAATACAGGTAAAGATAATAATAATAAAAGGGCTGTAATACCTACTGATCAAACAAATAAAGGTATTTGATCTAAGGATATATTATTAGGTCGTATATTAATAATTGTTGTAATAAAGTTTACTGCTCCTAAAATAGAGGAAATACCTGCCAAATGAAGTGAAAAAATTGCAAGATCGACTGATCTTCCTCTATGAGCAATATTTGATGAAAGTGGGGGGTAAACTGTTCATCCTGTTCCTGCTCCATTTTCCACAATTCTTCTAGAAATTAATAGTATAATAGATGGGGGTAATAATCAAAATCTTAT…
Run 2, Sample 12	LCO1490 + HCO2198	CTmin	10.18	7	Animalia	Arthropoda	Insecta	Lepidoptera	Tortricidae		Tortricidae sp.	AAAATGTTGATTAAATAGGATCACCTCCACCAGCAGGGTCAAAGAATGAAGTATTTAAATTTCGATCTGTTAATAATATAGTAATAGCTCCTGCTAATACAGGTAAAGATAATAATAATAAAAGGGCTGTAATACCTACTGATCAAACAAATAAAGGTATTTGATCTAAGGATATATTATTAGGTCGTATATTAATAATTGTTGTAATAAAGTTTACTGCTCCTAAAATAGAGGAAATACCTGCCAAATGAAGTGAAAAAATTGCAAGATCGACTGATCTTCCTCTATGAGCAATATTTGATGAAAGTGGGGGGTAAACTGTTCATCCTGTTCCTGCTCCATTTTCCACAATTCTTCTAGAAATTAATAGTATAATAGATGGGGGTAATAATCAAAATC…
Run 2, Sample 122	LCO1490 + HCO2198	CTmin	14.48	6	Animalia	Arthropoda	Insecta	Lepidoptera	Tortricidae		Tortricidae sp.	GGTGGATTAAATAGGGATCACCTCCACCAGCAGGGTCAAAGAATGAAGTATTTAAATTTCGATCTGTTAATAATATAGTAATAGCTCCTGCTAATACAGGTAAAGATAATAATAATAAAAGGGCTGTAATACCTACTGATCAAACAAATAAAGGTATTTGATCTAAGGATATATTATTAGGTCGTATATTAATAATTGTTGTAATAAAGTTTACTGCTCCTAAAATAGAGGAAATACCTGCCAAATGAAGTGAAAAAATTGCAAGATCGACTGATCTTCCTCTATGAGCAATATTTGATGAAAGTGGGGGGTAAACTGTTCATCCTGTTCCTGCTCCATTTTCCACAATTCTTCTAGAAATTAATAGTATAATAGATGGGGGTAATAATCAAAATCTTA…
Run 2, Sample 15	LCO1490 + HCO2198	CTmin	-1.35	7	Animalia	Arthropoda	Insecta	Lepidoptera	Tortricidae		Tortricidae sp.	TAAAATGTTGATTAAATAGAATCACCTCCACCAGCAGGGTCAAAGAATGAAGTATTTAAATTTCGATCTGTTAATAATATAGTAATAGCTCCTGCTAATACAGGTAAAGATAATAATAATAAAAGGGCTGTAATACCTACTGATCAAACAAATAAAGGTATTTGATCTAAGGATATATTATTAGGTCGTATATTAATAATTGTTGTAATAAAGTTTACTGCTCCTAAAATAGAGGAAATACCTGCCAAATGAAGTGAAAAAATTGCAAGATCGACTGATCTTCCTCTATGAGCAATATTTGATGAAAGTGGGGGGTAAACTGTTCATCCTGTTCCTGCTCCATTTTCCACAATTCTTCTAGAAATTAATAGTATAATAGATGGGGGTAATAATCAAAAT…
Run 2, Sample 23	LCO1490 + HCO2198	CTmin	-4.72	7	Animalia	Arthropoda	Insecta	Lepidoptera	Tortricidae		Tortricidae sp.	TAAATGTTGATTAAATAGGATCACCTCCACCAGCAGGGTCAAAGAATGAAGTATTTAAATTTCGATCTGTTAATAATATAGTAATAGCTCCTGCTAATACAGGTAAAGATAATAATAATAAAAGGGCTGTAATACCTACTGATCAAACAAATAAAGGTATTTGATCTAAGGATATATTATTAGGTCGTATATTAATAATTGTTGTAATAAAGTTTACTGCTCCTAAAATAGAGGAAATACCTGCCAAATGAAGTGAAAAAATTGCAAGATCGACTGATCTTCCTCTATGAGCAATATTTGATGAAAGTGGGGGGTAAACTGTTCATCCTGTTCCTGCTCCATTTTCCACAATTCTTCTAGAAATTAATAGTATAATAGATGGGGGTAATAATCAAAATC…
Run 2, Sample 28	LCO1490 + HCO2198	CTmin	-4.74		Animalia	Arthropoda	Insecta	Lepidoptera	Tortricidae		Tortricidae sp.	TAAAATGTTGATTAAATAGGATCACCTCCACCAGCAGGGTCAAAGAATGAAGTATTTAAATTTCGATCTGTTAATAATATAGTAATAGCTCCTGCTAATACAGGTAAAGATAATAATAATAAAAGGGCTGTAATACCTACTGATCAAACAAATAAAGGTATTTGATCTAAGGATATATTATTAGGTCGTATATTAATAATTGTTGTAATAAAGTTTACTGCTCCTAAAATAGAGGAAATACCTGCCAAATGAAGTGAAAAAATTGCAAGATCGACTGATCTTCCTCTATGAGCAATATTTGATGAAAGTGGGGGGTAAACTGTTCATCCTGTTCCTGCTCCATTTTCCACAATTCTTCTAGAAATTAATAGTATAATAGATGGGGGTAATAATCAAAAT…
Run 2, Sample 34	LCO1490 + HCO2198	CTmin		8	Animalia	Arthropoda	Insecta	Lepidoptera	Tortricidae		Tortricidae sp.	TAAATGTTGATTAAATAGAATCACCCTCCACCAGCAGGGTCAAAGAATGAAGTATTTAAATTTCGATCTGTTAATAATATAGTAATAGCTCCTGCTAATACAGGTAAAGATAATAATAATAAAAGGGCTGTAATACCTACGGATCAAACAAATAAAGGTATTTGATCTAAGGATATATTATTAGGTCGTATATTAATAATTGTTGTAATAAAGTTTACTGCTCCTAAAATAGAGGAAATACCTGCCAAATGAAGTGAAAAAATTGCAAGATCGACTGATCTTCCTCTATGAGCAATATTTGATGAAAGTGGGGGGTAAACTGTTCATCCTGTTCCTGCTCCATTTTCCACAATTCTTCTAGAAATTAATAGTATAATAGATGGGGGTAATAATCAAAAT…
Run 2, Sample 37	LCO1490 + HCO2198	CTmin	-3.55	7	Animalia	Arthropoda	Insecta	Lepidoptera	Tortricidae		Tortricidae sp.	TAAATGTTGATTAAATAGAATCACCTCCACCAGCAGGGTCAAAGAATGAAGTATTTAAATTTCGATCTGTTAATAATATAGTAATAGCTCCTGCTAATACAGGTAAAGATAATAATAATAAAAGGGCTGTAATACCTACTGATCAAACAAATAAAGGTATTTGATCTAAGGATATATTATTAGGTCGTATATTAATAATTGTTGTAATAAAGTTTACTGCTCCTAAAATAGAGGAAATACCTGCCAAATGAAGTGAAAAAATTGCAAGATCGACTGATCTTCCTCTATGAGCAATATTTGATGAAAGTGGGGGGTAAACTGTTCATCCTGTTCCTGCTCCATTTTCCACAATTCTTCTAGAAATTAATAGTATAATAGATGGGGGTAATAATCAAAATC…
Run 2, Sample 46	LCO1490 + HCO2198	CTmin	-2.15	6	Animalia	Arthropoda	Insecta	Lepidoptera	Tortricidae		Tortricidae sp.	TTAAATGTTGATTAAATAGGATCACCTCCACCAGCAGGGTCAAAGAATGAAGTATTTAAATTTCGATCTGTTAATAATATAGTAATAGCTCCTGCTAATACAGGTAAAGATAATAATAATAAAAGGGCTGTAATACCTACTGATCAAACAAATAAAGGTATTTGATCTAAGGATATATTATTAGGTCGTATATTAATAATTGTTGTAATAAAGTTTACTGCTCCTAAAATAGAGGAAATACCTGCCAAATGAAGTGAAAAAATTGCAAGATCGACTGATCTTCCTCTATGAGCAATATTTGATGAAAGTGGGGGGTAAACTGTTCATCCTGTTCCTGCTCCATTTTCCACAATTCTTCTAGAAATTAATAGTATAATAGATGGGGGTAATAATCAAAAT…
Run 2, Sample 51	LCO1490 + HCO2198	CTmin	16.18	5.2	Animalia	Arthropoda	Insecta	Lepidoptera	Tortricidae		Tortricidae sp.	TAAAATGTTGATTAAATAGGATCACCTCCACCAGCAGGGTCAAAGAATGAAGTATTTAAATTTCGATCTGTTAATAATATAGTAATAGCTCCTGCTAATACAGGTAAAGATAATAATAATAAAAGGGCTGTAATACCTACTGATCAAACAAATAAAGGTATTTGATCTAAGGATATATTATTAGGTCGTATATTAATAATTGTTGTAATAAAGTTTACTGCTCCTAAAATAGAGGAAATACCTGCCAAATGAAGTGAAAAAATTGCAAGATCGACTGATCTTCCTCTATGAGCAATATTTGATGAAAGTGGGGGGTAAACTGTTCATCCTGTTCCTGCTCCATTTTCCACAATTCTTCTAGAAATTAATAGTATAATAGATGGGGGTAATAATCAAAAT…
Run 2, Sample 65	LCO1490 + HCO2198	CTmin	-4.61	6.5	Animalia	Arthropoda	Insecta	Lepidoptera	Tortricidae		Tortricidae sp.	TAAAATGTTGATTAAATAGGATCACCTCCACCAGCAGGGTCAAAGAATGAAGTATTTAAATTTCGATCTGTTAATAATATAGTAATAGCTCCTGCTAATACAGGTAAAGATAATAATAATAAAAGGGCTGTAATACCTACTGATCAAACAAATAAAGGTATTTGATCTAAGGATATATTATTAGGTCGTATATTAATAATTGTTGTAATAAAGTTTACTGCTCCTAAAATAGAGGAAATACCTGCCAAATGAAGTGAAAAAATTGCAAGATCGACTGATCTTCCTCTATGAGCAATATTTGATGAAAGTGGGGGGTAAACTGTTCATCCTGTTCCTGCTCCATTTTCCACAATTCTTCTAGAAATTAATAGTATAATAGATGGGGGTAATAATCAAAAT…
Run 2, Sample 69	LCO1490 + HCO2198	CTmin		7.5	Animalia	Arthropoda	Insecta	Lepidoptera	Tortricidae		Tortricidae sp.	TGTTGAATTAAAATAGAATCACCTCCACCAGCAGGGTCAAAGAATGAAGTATTTAAATTTCGATCTGTTAATAATATAGTAATAGCTCCTGCTAATACAGGTAAAGATAATAATAATAAAAGGGCTGTAATACCTACTGATCAAACAAATAAAGGTATTTGATCTAAGGATATATTATTAGGTCGTATATTAATAATTGTTGTAATAAAGTTTACTGCTCCTAAAATAGAGGAAATACCTGCCAAATGAAGTGAAAAAATTGCAAGATCGACTGATCTTCCTCTATGAGCAATATTTGATGAAAGTGGGGGGTAAACTGTTCATCCTGTTCCTGCTCCATTTTCCACAATTCTTCTAGAAATTAATAGTATAATAGATGGGGGTAATAATCAAAATCTT…
Run 2, Sample 80	LCO1490 + HCO2198	CTmin	3.25	8	Animalia	Arthropoda	Insecta	Lepidoptera	Tortricidae		Tortricidae sp.	AACCTCCACCAGCAGGGTCAAAGAATGAAGTATTTAAATTTCGATCTGTTAATAATATAGTAATAGCTCCTGCTAATACAGGTAAAGATAATAATAATAAAAGGGCTGTAATACCTACTGATCAAACAAATAAAGGTATTTGATCTAAGGATATATTATTAGGTCGTATATTAATAATTGTTGTAATAAAGTTTACTGCTCCTAAAATAGAGGAAATACCTGCCAAATGAAGTGAAAAAATTGCAAGATCGACTGATCTTCCTCTATGAGCAATATTTGATGAAAGTGGGGGGTAAACTGTTCATCCTGTTCCTGCTCCATTTTCCACAATTCTTCTAGAAATTAATAGTATAATAGATGGGGGTAATAATCAAAATCTTATATTATTTATTCGTGGAA…
Run 2, Sample 85	LCO1490 + HCO2198	CTmin	-4.04	6.5	Animalia	Arthropoda	Insecta	Lepidoptera	Tortricidae		Tortricidae sp.	TAAAATGTTGATTAAATAGGATCACCTCCACCAGCAGGGTCAAAGAATGAAGTATTTAAATTTCGATCTGTTAATAATATAGTAATAGCTCCTGCTAATACAGGTAAAGATAATAATAATAAAAGGGCTGTAATACCTACTGATCAAACAAATAAAGGTATTTGATCTAAGGATATATTATTAGGTCGTATATTAATAATTGTTGTAATAAAGTTTACTGCTCCTAAAATAGAGGAAATACCTGCCAAATGAAGTGAAAAAATTGCAAGATCGACTGATCTTCCTCTATGAGCAATATTTGATGAAAGTGGGGGGTAAACTGTTCATCCTGTTCCTGCTCCATTTTCCACAATTCTTCTAGAAATTAATAGTATAATAGATGGGGGTAATAATCAAAAT…
Run 2, Sample 92	LCO1490 + HCO2198	CTmin			Animalia	Arthropoda	Insecta	Lepidoptera	Tortricidae		Tortricidae sp.	AGCAGGCGTCAAAGAATGAAGTATTTAAATTTCGATCTGTTAATAATATAGTAATAGCTCCTGCTAATACAGGTAAAGATAATAATAATAAAAGGGCTGTAATACCTACTGATCAAACAAATAAAGGTATTTGATCTAAGGATATATTATTAGGTCGTATATTAATAATTGTTGTAATAAAGTTTACTGCTCCTAAAATAAAGGAAATACCTGCCAAATGAAGTGAAAAAATTGCAAGATCGACTGATCTTCCTCTATGAGCAATATTTGATGAAGGTGGGGGGTAAACTGTTCATCCTGTTCCTGCTCCATTTTCCACAATTCTTCTAGAAATTAATAGTATAATAGATGGGGGTAATAATCAAAATCTTATATTATTTATTCGTGGAAAAGCTATAT…
Run 3, Sample 117	LCO1490 + HCO2198	CTmin	-3.84		Animalia	Arthropoda	Insecta	Lepidoptera	Tortricidae		Tortricidae sp.	AAACGGATCACCTTCCCACCAGCAGGGGTCAAAGAATGGAAGTATTTAAATCTTCGATCTGTTAATAATATAGTAATAGCTCCTGCTAATACAGGTAAAGATAATAATAATAAAAGGGCTGTAATACCTACTGATCAAACAAATAAAGGTATTTGATCTAAGGATATATTATTAGGTCGTATATTAATAATTGTTGTAATAAAGTTTACTGCTCCTAAAATAGAGGAAATACCTGCCAAATGAAGTGAAAAAATTGCAAGATCGACTGATCTTCCTCTATGAGCAATATTTGATGAAGGTGGGGGGTAAACTGTTCATCCTGTTCCTGCTCCATTTTCCACAATTCTTCTAGAAATTAATAGTATAATAGATGGGGGTAATAATCAAAATCTTATATTA…
Run 3, Sample 17	LCO1490 + HCO2198	CTmin	-5.98	7.1	Animalia	Arthropoda	Insecta	Lepidoptera	Tortricidae		Tortricidae sp.	TTAAAATGTTGATTAAATAGGATCACCTCCACCAGCAGGGTCAAAGAATGAAGTATTTAAATTTCGATCTGTTAATAATATAGTAATAGCTCCTGCTAATACAGGTAAAGATAATAATAATAAAAGGGCTGTAATACCTACTGATCAAACAAATAAAGGTATTTGATCTAAGGATATATTATTAGGTCGTATATTAATAATTGTTGTAATAAAGTTTACTGCTCCTAAAATAGAGGAAATACCTGCCAAATGAAGTGAAAAAATTGCAAGATCGACTGATCTTCCTCTATGAGCAATATTTGATGAAAGTGGGGGGTAAACTGTTCATCCTGTTCCTGCTCCATTTTCCACAATTCTTCTAGAAATTAATAGTATAATAGATGGGGGTAATAATCAAAA…
Run 3, Sample 24	LCO1490 + HCO2198	CTmin	-6.2	9	Animalia	Arthropoda	Insecta	Lepidoptera	Tortricidae		Tortricidae sp.	TTTAAATTTTCGATCTGTTAATAATATAGTAATAGCTCCTGCTAATACAGGTAAAGATAATAATAATAAAAGGGCTGTAATACCTACTGATCAAACAAATAAAGGTATTTGATCTAAGGATATATTATTAGGTCGTATATTAATAATTGTTGTAATAAAGTTTACTGGCTCCTAAAATAGAGGAAATACCTGCCAAATGAAGTGAAAAAATTGCAAGATCGACTGATCTTCCTCTATGAGCAATATTTGATGAAAGTGGGGGGTAAACTGTTCATCCTGTTCCTGCTCCATTTTCCACAATTCTTCTAGAAATTAATAGTATAATAGATGGGGGTAATAATCAAAATCTTATATTATTTATTCGTGGAAAAGCTATATCTGGAGCTCCTAATATTAAAG…
Run 3, Sample 31	LCO1490 + HCO2198	CTmin	-3.73	6	Animalia	Arthropoda	Insecta	Lepidoptera	Tortricidae		Tortricidae sp.	TAAATTGTTGATTAAATAGGGATCACCTCCACCAGCAGGGTCAAAGAATGAAGTATTTAAATTTCGATCTGTTAATAATATAGTAATAGCTCCTGCTAATACAGGTAAAGATAATAATAATAAAAGGGCTGTAATACCTACTGATCAAACAAATAAAGGTATTTGATCTAAGGATATATTATTAGGTCGTATATTAATAATTGTTGTAATAAAGTTTACTGCTCCTAAAATAGAGGAAATACCTGCCAAATGAAGTGAAAAAATTGCAAGATCGACTGATCTTCCTCTATGAGCAATATTTGATGAAAGTGGGGGGTAAACTGTTCATCCTGTTCCTGCTCCATTTTCCACAATTCTTCTAGAAATTAATAGTATAATAGATGGGGGTAATAATCAAAA…
Run 3, Sample 32	LCO1490 + HCO2198	CTmin	-3.72	7.6	Animalia	Arthropoda	Insecta	Lepidoptera	Tortricidae		Tortricidae sp.	ATAAATAAGGATCACCTCCACCAGCAGGGGTCAAAGAATGAAGTATTTAAATTTCGATCTGTTAATAATATAGTAATAGCTCCTGCTAATACAGGTAAAGATAATAATAATAAAAGGGCTGTAATACCTACTGATCAAACAAATAAAGGTATTTGATCTAAGGATATATTATTAGGTCGTATATTAATAATTGTTGTAATAAAGTTTACTGCTCCTAAAATAGAGGAAATACCTGCCAAATGAAGTGAAAAAATTGCAAGATCGACTGATCTTCCTCTATGAGCAATATTTGATGAAAGTGGGGGGTAAACTGTTCATCCTGTTCCTGCTCCATTTTCCACAATTCTTCTAGAAATTAATAGTATAATAGATGGGGGTAATAATCAAAATCTTATATTA…
Run 3, Sample 42	LCO1490 + HCO2198	CTmin	-4.27	7	Animalia	Arthropoda	Insecta	Lepidoptera	Tortricidae		Tortricidae sp.	AGTTGAATTAAATAGAATCACCCTCCACCAGCAGGGTCAAAGAATGAAGTATTTAAATTTCGATCTGTTAATAATATAGTAATAGCTCCTGCTAATACAGGTAAAGATAATAATAATAAAAGGGCTGTAATACCTACTGATCAAACAAATAAAGGTATTTGATCTAAGGATATATTATTAGGTCGTATATTAATAATTGTTGTAATAAAGTTTACTGCTCCTAAAATAGAGGAAATACCTGCCAAATGAAGTGAAAAAATTGCAAGATCGACTGATCTTCCTCTATGAGCAATATTTGATGAAAGTGGGGGGTAAACTGTTCATCCTGTTCCTGCTCCATTTTCCACAATTCTTCTAGAAATTAATAGTATAATAGATGGGGGTAATAATCAAAATCTT…
Run 3, Sample 45	LCO1490 + HCO2198	CTmin	-5.67	9	Animalia	Arthropoda	Insecta	Lepidoptera	Tortricidae		Tortricidae sp.	TAAAAGTTGAATTAAATAGAATCACCTCCACCAGCAGGGTCAAAGAATGAAGTATTTAAATTTCGATCTGTTAATAATATAGTAATAGCTCCTGCTAATACAGGTAAAGATAATAATAATAAAAGGGCTGTAATACCTACTGATCAAACAAATAAAGGTATTTGATCTAAGGATATATTATTAGGTCGTATATTAATAATTGTTGTAATAAAGTTTACTGCTCCTAAAATAGAGGAAATACCTGCCAAATGAAGTGAAAAAATTGCAAGATCGACTGATCTTCCTCTATGAGCAATATTTGATGAAAGTGGGGGGTAAACTGTTCATCCTGTTCCTGCTCCATTTTCCACAATTCTTCTAGAAATTAATAGTATAATAGATGGGGGTAATAATCAAAAT…
Run 3, Sample 6	LCO1490 + HCO2198	CTmin	-4.48	7	Animalia	Arthropoda	Insecta	Lepidoptera	Tortricidae		Tortricidae sp.	GTTGAAATTAAATAGGATCACCTCCACCAGCAGGGTCAAAGAATGAAGTATTTAAATTTCGATCTGTTAATAATATAGTAATAGCTCCTGCTAATACAGGTAAAGATAATAATAATAAAAGGGCTGTAATACCTACTGATCAAACAAATAAAGGTATTTGATCTAAGGATATATTATTAGGTCGTATATTAATAATTGTTGTAATAAAGTTTACTGCTCCTAAAATAGAGGAAATACCTGCCAAATGAAGTGAAAAAATTGCAAGATCGACTGATCTTCCTCTATGAGCAATATTTGATGAAAGTGGGGGGTAAACTGTTCATCCTGTTCCTGCTCCATTTTCCACAATTCTTCTAGAAATTAATAGTATAATAGATGGGGGTAATAATCAAAATCTTA…
Run 3, Sample 95	LCO1490 + HCO2198	CTmin	-5.2	8	Animalia	Arthropoda	Insecta	Lepidoptera	Tortricidae		Tortricidae sp.	ATAAGGAATCACCTCCACCAGCAGGGTCAAAGAATGAAGTATTTAAATTTCGATCTGTTAATAATATAGTAATAGCTCCAGCTAATACAGGTAAAGATAATAATAATAAAAGGGCTGTAATACCTACTGATCAAACAAATAAAGGTATTTGATCTAAGGATATATTATTAGGTCGTATATTAATAATTGTTGTAATAAAGTTTACTGCTCCTAAAATAGAGGAAATACCTGCCAAATGAAGTGAAAAAATTGCAAGATCGACTGATCTTCCTCTATGAGCAATATTTGATGAAGGTGGGGGGTAAACTGTTCATCCTGTTCCTGCTCCATTTTCCACAATTCTTCTAGAAATTAATAGTATAATAGATGGGGGTAATAATCAAAATCTTATATTATTTA…
Run 4, Sample 106	LCO1490 + HCO2198	CTmin	-4.06	8	Animalia	Arthropoda	Insecta	Lepidoptera	Tortricidae		Tortricidae sp.	TAAAATGTTGATTAAATAGGATCACCTCCACCAGCAGGGTCAAAGAATGAAGTATTTAAATTTCGATCTGTTAATAATATAGTAATAGCTCCTGCTAATACAGGTAAAGATAATAATAATAAAAGGGCTGTAATACCTACTGATCAAACAAATAAAGGTATTTGATCTAAGGATATATTATTAGGTCGTATATTAATAATTGTTGTAATAAAGTTTACTGCTCCTAAAATAGAGGAAATACCTGCCAAATGAAGTGAAAAAATTGCAAGATCGACTGATCTTCCTCTATGAGCAATATTTGATGAAAGTGGGGGGTAAACTGTTCATCCTGTTCCTGCTCCATTTTCCACAATTCTTCTAGAAATTAATAGTATAATAGATGGGGGTAATAATCAAAAT…
Run 4, Sample 117	LCO1490 + HCO2198	CTmin	-4.52	7.2	Animalia	Arthropoda	Insecta	Lepidoptera	Tortricidae		Tortricidae sp.	TTAAATGTTGATTAAATAGAATCACCTCCACCAGCAGGGTCAAAGAATGAAGTATTTAAATTTCGATCTGTTAATAATATAGTAATAGCTCCTGCTAATACAGGTAAAGATAATAATAATAAAAGGGCTGTAATACCTACTGATCAAACAAATAAAGGTATTTGATCTAAGGATATATTATTAGGTCGTATATTAATAATTGTTGTAATAAAGTTTACTGCTCCTAAAATAGAGGAAATACCTGCCAAATGAAGTGAAAAAATTGCAAGATCGACTGATCTTCCTCTATGAGCAATATTTGATGAAAGTGGGGGGTAAACTGTTCATCCTGTTCCTGCTCCATTTTCCACAATTCTTCTAGAAATTAATAGTATAATAGATGGGGGTAATAATCAAAAT…
Run 4, Sample 121	LCO1490 + HCO2198	CTmin	1.74	7.7	Animalia	Arthropoda	Insecta	Lepidoptera	Tortricidae		Tortricidae sp.	TAAAATGTTGATTAAATAGGATCACCTCCACCAGCAGGGTCAAAGAATGAAGTATTTAAATTTCGATCTGTTAATAATATAGTAATAGCTCCTGCTAATACAGGTAAAGATAATAATAATAAAAGGGCTGTAATACCTACTGATCAAACAAATAAAGGTATTTGATCTAAGGATATATTATTAGGTCGTATATTAATAATTGTTGTAATAAAGTTTACTGCTCCTAAAATAGAGGAAATACCTGCCAAATGAAGTGAAAAAATTGCAAGATCGACTGATCTTCCTCTATGAGCAATATTTGATGAAAGTGGGGGGTAAACTGTTCATCCTGTTCCTGCTCCATTTTCCACAATTCTTCTAGAAATTAATAGTATAATAGATGGGGGTAATAATCAAAAT…
Run 4, Sample 123	LCO1490 + HCO2198	CTmin	-3.08	6	Animalia	Arthropoda	Insecta	Lepidoptera	Tortricidae		Tortricidae sp.	GAATTAAATAGGATCACCTCCACCAGCAGGGTCAAAGAATGAAGTATTTAAATTTCGATCTGTTAATAATATAGTAATAGCTCCTGCTAATACAGGTAAAGATAATAATAATAAAAGGGCTGTAATACCTACTGATCAAACAAATAAAGGTATTTGATCTAAGGATATATTATTAGGTCGTATATTAATAATTGTTGTAATAAAGTTTACTGCTCCTAAAATAGAGGAAATACCTGCCAAATGAAGTGAAAAAATTGCAAGATCGACTGATCTTCCTCTATGAGCAATATTTGATGAAAGTGGGGGGTAAACTGTTCATCCTGTTCCTGCTCCATTTTCCACAATTCTTCTAGAAATTAATAGTATAATAGATGGGGGTAATAATCAAAATCTTATATT…
Run 4, Sample 21	LCO1490 + HCO2198	CTmin		7	Animalia	Arthropoda	Insecta	Lepidoptera	Tortricidae		Tortricidae sp.	TTTCGATCTTGTTAATAATATAGTAATAGCTTCCTGCTAATACAGGTAAAGATAATAATAATAAAAGAGGCTCGTAATACCTACTGATCAAACAAATAAAGGTATTCGATCTAAGGATATATTATTAGGTCGTATATTAATAATTGTTGTAATAAAGTTTACTGCTCCTAAAATAGAGGAAATACCTGCCAAATGAAGTGAAAAAATTGCAAGATCGACTGATCTTCCTCTATGAGCAATATTTGATGAAAGTGGGGGGTAAACTGTTCATCCTGTTCCTGCTCCATTTTCCACAATTCTTCTAGAAATTAATAGTATAATAGATGGGGGTAATAATCAAAATCTTATATTATTTATTCGTGGAAAAGCTATATCTGGAGCTCCTAATATTAAAGGTAC…
Run 4, Sample 29	LCO1490 + HCO2198	CTmin	-5.77	8.5	Animalia	Arthropoda	Insecta	Lepidoptera	Tortricidae		Tortricidae sp.	TAAAATGTTGATTAAATAGGATCACCTCCACCAGCAGGGTCAAAGAATGAAGTATTTAAATTTCGATCTGTTAATAATATAGTAATAGCTCCTGCTAATACAGGTAAAGATAATAATAATAAAAGGGCTGTAATACCTACTGATCAAACAAATAAAGGTATTTGATCTAAGGATATATTATTAGGTCGTATATTAATAATTGTTGTAATAAAGTTTACTGCTCCTAAAATAGAGGAAATACCTGCCAAATGAAGTGAAAAAATTGCAAGATCGACTGATCTTCCTCTATGAGCAATATTTGATGAAAGTGGGGGGTAAACTGTTCATCCTGTTCCTGCTCCATTTTCCACAATTCTTCTAGAAATTAATAGTATAATAGATGGGGGTAATAATCAAAAT…
Run 4, Sample 37	LCO1490 + HCO2198	CTmin	-1.45	8.5	Animalia	Arthropoda	Insecta	Lepidoptera	Tortricidae		Tortricidae sp.	ATGTTGAATTAAATAGGATCACCCTCCACCAGCAGGGTCAAAGAATGAAGTATTTAAATTTCGATCTGTTAATAATATAGTAATAGCTCCTGCTAATACAGGTAAAGATAATAATAATAAAAGGGCTGTAATACCTACTGATCAAACAAATAAAGGTATTTGATCTAAGGATATATTATTAGGTCGTATATTAATAATTGTTGTAATAAAGTTTACTGCTCCTAAAATAGAGGAAATACCTGCCAAATGAAGTGAAAAAATTGCAAGATCGACTGATCTTCCTCTATGAGCAATATTTGATGAAAGTGGGGGGTAAACTGTTCATCCTGTTCCTGCTCCATTTTCCACAATTCTTCTAGAAATTAATAGTATAATAGATGGGGGTAATAATCAAAATCT…
Run 4, Sample 41	LCO1490 + HCO2198	CTmin	-4.99	6.9	Animalia	Arthropoda	Insecta	Lepidoptera	Tortricidae		Tortricidae sp.	TCCTCGCTTCCATTTTTCCACAATTCCTTCTAGAAATTTAATAGTATAATAGATGGGGGTAATAATTCAAAATCTTATATTATTTTATTCCGTGGGAAAAGCTATATCTGGGAGCTTCCTAATATTAAAGGTACTAATCAATTCACCAAATCCCTCCAATTCATAATTCGGTATTTACTATTGAAAAAAAATTATAATAAAAGCATGAAGCAGTTACAATAGTATTATAAATTTTGATCATCTCCAATTCAAAGAAACCAGGATTTTCCTAATTTCTGCTCGAATTAATAATCTTTAAAGATGTTTCCTACTATTCCCAGCTCAAATTCCAAAAATAAAATATAATGTTCCATATTTTA	0.92
Run 4, Sample 67	LCO1490 + HCO2198	CTmin	-4.56	6	Animalia	Arthropoda	Insecta	Lepidoptera	Tortricidae		Tortricidae sp.	TAAAATGTTGATTAAATAGGATCACCTCCACCAGCAGGGTCAAAGAATGAAGTATTTAAATTTCGATCTGTTAATAATATAGTAATAGCTCCTGCTAATACAGGTAAAGATAATAATAATAAAAGGGCTGTAATACCTACTGATCAAACAAATAAAGGTATTTGATCTAAGGATATATTATTAGGTCGTATATTAATAATTGTTGTAATAAAGTTTACTGCTCCTAAAATAGAGGAAATACCTGCCAAATGAAGTGAAAAAATTGCAAGATCGACTGATCTTCCTCTATGAGCAATATTTGATGAAAGTGGGGGGTAAACTGTTCATCCTGTTCCTGCTCCATTTTCCACAATTCTTCTAGAAATTAATAGTATAATAGATGGGGGTAATAATCAAAAT…
Run 4, Sample 88	LCO1490 + HCO2198	CTmin	-2.5		Animalia	Arthropoda	Insecta	Lepidoptera	Tortricidae		Tortricidae sp.	TAAAATGTTGAAATAAATAGAATCACCTCCACCAGCAGGGTCAAAGAATGAAGTATTTAAATTTCGATCTGTTAATAATATAGTAATAGCTCCTGCTAATACAGGTAAAGATAATAATAATAAAAGGGCTGTAATACCTACTGATCAAACAAATAAAGGTATTTGATCTAAGGATATATTATTAGGTCGTATATTAATAATTGTTGTAATAAAGTTTACTGCTCCTAAAATAGAGGAAATACCTGCCAAATGAAGTGAAAAAATTGCAAGATCGACTGATCTTCCTCTATGAGCAATATTTGATGAAAGTGGGGGGTAAACTGTTCATCCTGTTCCTGCTCCATTTTCCACAATTCTTCTAGAAATTAATAGTATAATAGATGGGGGTAATAATCAAAA…
Run 5, Sample 35	LCO1490 + HCO2198	CTmax	44.41	7	Animalia	Arthropoda	Insecta	Lepidoptera	Tortricidae		Tortricidae sp.	TAAATGTTGATTAAATAGGGATCACCTCCACCAGCAGGGTCAAAGAATGAAGTATTTAAATTTCGATCTGTTAATAATATAGTAATAGCTCCTGCTAATACAGGTAAAGATAATAATAATAAAAGGGCTGTAATACCTACTGATCAAACAAATAAAGGTATTTGATCTAAGGATATATTATTAGGTCGTATATTAATAATTGTTGTAATAAAGTTTACTGCTCCTAAAATAGAGGAAATACCTGCCAAATGAAGTGAAAAAATTGCAAGATCGACTGATCTTCCTCTATGAGCAATATTTGATGAAAGTGGGGGGTAAACTGTTCATCCTGTTCCTGCTCCATTTTCCACAATTCTTCTAGAAATTAATAGTATAATAGATGGGGGTAATAATCAAAAT…
Run 5, Sample 44	BR2 + BF3	CTmax	45.27	7.8	Animalia	Arthropoda	Insecta	Lepidoptera	Tortricidae		Tortricidae sp.	AAAAATAAATGGTTGGAATTTAAAATTAGGGAATCACCCTCCCACCCAGCAGGGGTCAAAGAATGGAAGTATTTAAATTTCGATCTGTTAATAATATAGTAATAGCTCCTGCTAATACAGGTAAAGATAATAATAATAAAAGGGCTGTAATACCTACTGATCAAACAAATAAAGGTATTTGATCTAAGGATATATTATTAGGTCGTATATTAATAATTGTTGTAATAAAGTTTACTGCTCCTAAAATAGAGGAAATACCTGCCAAATGAAGTGAAAAAATTGCAAGATCGACTGATCTTCCTCTATGAGCAATATTTGATGAAAGTGGGGGGTAAACTGTTCATCCTGTTCCTGCTCCATTTTCCACAATTCTTCTAGAAATTAATAGTATAATAGATG…	96.44 %
Run 6, Sample 101	LCO1490 + HCO2198	CTmax	41.67	8	Animalia	Arthropoda	Insecta	Lepidoptera	Tortricidae		Tortricidae sp.	AAAAATGTTGATTAAATAGAATCACCTCCACCAGGCAGGATCAAAGAATGAAGTATTTAAATTTCGATCTGTTAATAATATAGTAATAGCTCCTGCTAATACAGGTAAAGATAATAATAATAAAAGGGCTGTAATACCTACTGATCAAACAAATAAAGGTATTTGATCTAAGGATATATTATTAGGTCGTATATTAATAATTGTTGTAATAAAGTTTACTGCTCCTAAAATAGAGGAAATACCTGCCAAATGAAGTGAAAAAATTGCAAGATCGACTGATCTTCCTCTATGAGCAATATTTGATGAAAGTGGGGGGTAAACTGTTCATCCTGTTCCTGCTCCATTTTCCACAATTCTTCTAGAAATTAATAGTATAATAGATGGGGGTAATAATCAAAA…
Run 6, Sample 102	LCO1490 + HCO2198	CTmax	44.79	8	Animalia	Arthropoda	Insecta	Lepidoptera	Tortricidae		Tortricidae sp.	TAAAATGTTGATTAAATAGGATCACCTCCACCAGCAGGGTCAAAGAATGAAGTATTTAAATTTCGATCTGTTAATAATATAGTAATAGCTCCTGCTAATACAGGTAAAGATAATAATAATAAAAGGGCTGTAATACCTACTGATCAAACAAATAAAGGTATTTGATCTAAGGATATATTATTAGGTCGTATATTAATAATTGTTGTAATAAAGTTTACTGCTCCTAAAATAGAGGAAATACCTGCCAAATGAAGTGAAAAAATTGCAAGATCGACTGATCTTCCTCTATGAGCAATATTTGATGAAAGTGGGGGGTAAACTGTTCATCCTGTTCCTGCTCCATTTTCCACAATTCTTCTAGAAATTAATAGTATAATAGATGGGGGTAATAATCAAAAT…
Run 6, Sample 33	LCO1490 + HCO2198	CTmax	45.16	8	Animalia	Arthropoda	Insecta	Lepidoptera	Tortricidae		Tortricidae sp.	TTGATATAAATAGGAATCACCTCCACCAGCAGGGTCAAAGAATGAAGTATTTAAATTTCGATCTGTTAATAATATAGTAATAGCTCCTGCTAATACAGGTAAAGATAATAATAATAAAAGGGCTGTAATACCTACTGATCAAACAAATAAAGGTATTTGATCTAAGGATATATTATTAGGTCGTATATTAATAATTGTTGTAATAAAGTTTACTGCTCCTAAAATAGAGGAAATACCTGCCAAATGAAGTGAAAAAATTGCAAGATCGACTGATCTTCCTCTATGAGCAATATTTGATGAAAGTGGGGGGTAAACTGTTCATCCTGTTCCTGCTCCATTTTCCACAATTCTTCTAGAAATTAATAGTATAATAGATGGGGGTAATAATCAAAATCTTAT…
Run 6, Sample 45	LCO1490 + HCO2198	CTmax	42.63	8	Animalia	Arthropoda	Insecta	Lepidoptera	Tortricidae		Tortricidae sp.	TAAAATGTTGATTAAATAGGATCACCTCCACCAGCAGGGTCAAAGAATGAAGTATTTAAATTTCGATCTGTTAATAATATAGTAATAGCTCCTGCTAATACAGGTAAAGATAATAATAATAAAAGGGCTGTAATACCTACTGATCAAACAAATAAAGGTATTTGATCTAAGGATATATTATTAGGTCGTATATTAATAATTGTTGTAATAAAGTTTACTGCTCCTAAAATAGAGGAAATACCTGCCAAATGAAGTGAAAAAATTGCAAGATCGACTGATCTTCCTCTATGAGCAATATTTGATGAAAGTGGGGGGTAAACTGTTCATCCTGTTCCTGCTCCATTTTCCACAATTCTTCTAGAAATTAATAGTATAATAGATGGGGGTAATAATCAAAAT…
Run 6, Sample 49	LCO1490 + HCO2198	CTmax	43.57	7.6	Animalia	Arthropoda	Insecta	Lepidoptera	Tortricidae		Tortricidae sp.	ATGTTGATATAAATAGGATCACCTCCACCAGCAGGGTCAAAGAATGAAGTATTTAAATTTCGATCTGTTAATAATATAGTAATAGCTCCTGCTAATACAGGTAAAGATAATAATAATAAAAGGGCTGTAATACCTACTGATCAAACAAATAAAGGTATTTGATCTAAGGATATATTATTAGGTCGTATATTAATAATTGTTGTAATAAAGTTTACTGCTCCTAAAATAGAGGAAATACCTGCCAAATGAAGTGAAAAAATTGCAAGATCGACTGATCTTCCTCTATGAGCAATATTTGATGAAAGTGGGGGGTAAACTGTTCATCCTGTTCCTGCTCCATTTTCCACAATTCTTCTAGAAATTAATAGTATAATAGATGGGGGTAATAATCAAAATCTT…
Run 6, Sample 50	LCO1490 + HCO2198	CTmax	44.49	6.2	Animalia	Arthropoda	Insecta	Lepidoptera	Tortricidae		Tortricidae sp.	ATGTTGAAATAAATAGGATCACCTCCACCAGCAGGGTCAAAGAATGAAGTATTTAAATTTCGATCTGTTAATAATATAGTAATAGCTCCTGCTAATACAGGTAAAGATAATAATAATAAAAGGGCTGTAATACCTACTGATCAAACAAATAAAGGTATTTGATCTAAGGATATATTATTAGGTCGTATATTAATAATTGTTGTAATAAAGTTTACTGCTCCTAAAATAGAGGAAATACCTGCCAAATGAAGTGAAAAAATTGCAAGATCGACTGATCTTCCTCTATGAGCAATATTTGATGAAAGTGGGGGGTAAACTGTTCATCCTGTTCCTGCTCCATTTTCCACAATTCTTCTAGAAATTAATAGTATAATAGATGGGGGTAATAATCAAAATCTT…
Run 6, Sample 55	LCO1490 + HCO2198	CTmax	42.73	8.4	Animalia	Arthropoda	Insecta	Lepidoptera	Tortricidae		Tortricidae sp.	TAAAATGTTGATTAAATAGGATCACCTCCACCAGCAGGGTCAAAGAATGAAGTATTTAAATTTCGATCTGTTAATAATATAGTAATAGCTCCTGCTAATACAGGTAAAGATAATAATAATAAAAGGGCTGTAATACCTACTGATCAAACAAATAAAGGTATTTGATCTAAGGATATATTATTAGGTCGTATATTAATAATTGTTGTAATAAAGTTTACTGCTCCTAAAATAGAGGAAATACCTGCCAAATGAAGTGAAAAAATTGCAAGATCGACTGATCTTCCTCTATGAGCAATATTTGATGAAAGTGGGGGGTAAACTGTTCATCCTGTTCCTGCTCCATTTTCCACAATTCTTCTAGAAATTAATAGTATAATAGATGGGGGTAATAATCAAAAT…
Run 6, Sample 57	LCO1490 + HCO2198	CTmax	42.82	5.8	Animalia	Arthropoda	Insecta	Lepidoptera	Tortricidae		Tortricidae sp.	ATATAAATAGGATCACCTCCACCAGCAGGGTCAAAGAATGAAGTATTTAAATTTCGATCTGTTAATAATATAGTAATAGCTCCTGCTAATACAGGTAAAGATAATAATAATAAAAGGGCTGTAATACCTACTGATCAAACAAATAAAGGTATTTGATCTAAGGATATATTATTAGGTCGTATATTAATAATTGTTGTAATAAAGTTTACTGCTCCTAAAATAGAGGAAATACCTGCCAAATGAAGTGAAAAAATTGCAAGATCGACTGATCTTCCTCTATGAGCAATATTTGATGAAAGTGGGGGGTAAACTGTTCATCCTGTTCCTGCTCCATTTTCCACAATTCTTCTAGAAATTAATAGTATAATAGATGGGGGTAATAATCAAAATCTTATATTA…
Run 6, Sample 62	LCO1490 + HCO2198	CTmax	28.67	7.5	Animalia	Arthropoda	Insecta	Lepidoptera	Tortricidae		Tortricidae sp.	TAAAATGTTGATTAAATAGGATCACCTCCACCAGCAGGGTCAAAGAATGAAGTATTTAAATTTCGATCTGTTAATAATATAGTAATAGCTCCTGCTAATACAGGTAAAGATAATAATAATAAAAGGGCTGTAATACCTACTGATCAAACAAATAAAGGTATTTGATCTAAGGATATATTATTAGGTCGTATATTAATAATTGTTGTAATAAAGTTTACTGCTCCTAAAATAGAGGAAATACCTGCCAAATGAAGTGAAAAAATTGCAAGATCGACTGATCTTCCTCTATGAGCAATATTTGATGAAAGTGGGGGGTAAACTGTTCATCCTGTTCCTGCTCCATTTTCCACAATTCTTCTAGAAATTAATAGTATAATAGATGGGGGTAATAATCAAAAT…
Run 6, Sample 86	LCO1490 + HCO2198	CTmax	43.76	7	Animalia	Arthropoda	Insecta	Lepidoptera	Tortricidae		Tortricidae sp.	TAAAATGTTGAATTAAATAGGATCACCTCCACCAGCAGGGTCAAAGAATGAAGTATTTAAATTTCGATCTGTTAATAATATAGTAATAGCTCCTGCTAATACAGGTAAAGATAATAATAATAAAAGGGCTGTAATACCTACTGATCAAACAAATAAAGGTATTTGATCTAAGGATATATTATTAGGTCGTATATTAATAATTGTTGTAATAAAGTTTACTGCTCCTAAAATAGAGGAAATACCTGCCAAATGAAGTGAAAAAATTGCAAGATCGACTGATCTTCCTCTATGAGCAATATTTGATGAAAGTGGGGGGTAAACTGTTCATCCTGTTCCTGCTCCATTTTCCACAATTCTTCTAGAAATTAATAGTATAATAGATGGGGGTAATAATCAAAA…
Run 6, Sample 90	LCO1490 + HCO2198	CTmax	41.52	8	Animalia	Arthropoda	Insecta	Lepidoptera	Tortricidae		Tortricidae sp.	TGATATAAATAGGATCACCTCCACCAGCAGGGTCAAAGAATGAAGTATTTAAATTTCGATCTGTTAATAATATAGTAATAGCTCCTGCTAATACAGGTAAAGATAATAATAATAAAAGGGCTGTAATACCTACTGATCAAACAAATAAAGGTATTTGATCTAAGGATATATTATTAGGTCGTATATTAATAATTGTTGTAATAAAGTTTACTGCTCCTAAAATAGAGGAAATACCTGCCAAATGAAGTGAAAAAATTGCAAGATCGACTGATCTTCCTCTATGAGCAATATTTGATGAAAGTGGGGGGTAAACTGTTCATCCTGTTCCTGCTCCATTTTCCACAATTCTTCTAGAAATTAATAGTATAATAGATGGGGGTAATAATCAAAATCTTATAT…
Run 6, Sample 93	LCO1490 + HCO2198	CTmax	45.42	7	Animalia	Arthropoda	Insecta	Lepidoptera	Tortricidae		Tortricidae sp.	TGTTGATATAAATAGGGATCACCTCCACCAGCAGGGTCAAAGAATGAAGTATTTAAATTTCGATCTGTTAATAATATAGTAATAGCTCCTGCTAATACAGGTAAAGATAATAATAATAAAAGGGCTGTAATACCTACTGATCAAACAAATAAAGGTATTTGATCTAAGGATATATTATTAGGTCGTATATTAATAATTGTTGTAATAAAGTTTACTGCTCCTAAAATAGAGGAAATACCTGCCAAATGAAGTGAAAAAATTGCAAGATCGACTGATCTTCCTCTATGAGCAATATTTGATGAAAGTGGGGGGTAAACTGTTCATCCTGTTCCTGCTCCATTTTCCACAATTCTTCTAGAAATTAATAGTATAATAGATGGGGGTAATAATCAAAATCTT…
Run 2, Sample 42	LCO1490 + HCO2198	CTmin			Animalia	Arthropoda	Insecta	Lepidoptera	Geometridae	Eupithecia	Eupithecia pusillata	AAAAGGTTGATAAGAATAGGATCTCCTCCTCCTGCGGGATCGAAAAATGAGGTATTTAAATTTCGATCTGTTAAAAGTATAGTAATAGCACCAGCTAAAACGGGTAAAGATAAAAGAAGTAAAAAAGCTGTAATTCCTACAGCTCAAACAAATAAAGGTAATTGATCAAAAAATATATTATTTAAACGTATATTAATAATAGTTGTAATAAAATTGATGGCTCCTAAAATAGATGAAATTCCTGCTAAATGTAAAGAAAAAATAGCTAAATCTACAGAACTTCCCCCATGTGCAATATTAGATGATAAAGGAGGATAAACTGTTCATCCAGTTCCAGCACCATTTTCTACAATTCTTCTTGAAATTAATAATGTGATAGAGGGGGGTAATAATCAAAAG…
Run 3, Sample 70	LCO1490 + HCO2198	CTmin	-5.33	3.2	Animalia	Arthropoda	Insecta	Lepidoptera	Noctuidae	Eurois	Eurois occulta	TAAATTAGGGGTCCTCCTCCTCCCGCAGGGTCAAAAAAAGATGTATTTAAATTTCGATCTGTTAAAAGTATAGTAATAGCTCCAGCTAAAACAGGTAAAGATAATAATAATAAAAAAGCAGTAATTCCTACTGCTCAAATAAATAATGGTATTTGATCAAAGGATAATCTATTTAATCGTATATTAATAATTGTAGTAATGAAATTAATAGCTCCTAAAATAGAAGAAATTCCTGCTAAATGAAGGGAAAAAATAGCAAGATCTACTGATCTTCCACCATGTGCAATATTAGATGAAAGTGGGGGGTACACTGTTCATCCTGTTCCTGCTCCATTTTCTACAATTCTTCTTGAAATTAAAAGAGTTAATGAGGGGGGAAGAAGTCAGAAACTTATATTG…
Run 3, Sample 91	LCO1490 + HCO2198	CTmin	-5.53	1.9	Animalia	Arthropoda	Insecta	Lepidoptera	Noctuidae	Eurois	Eurois occulta	AGGGGTTCTCCCTCCTCCCGCAGGGGTCAAAAAAAGATGTATTTAAATCTTCGATCTGTTAAAAGTATAGTAATAGCTCCAGCTAAAACAGGTAAAGATAATAATAATAAAAAAGCAGTAATTCCTACTGCTCAAATAAATAATGGTATTTGATCAAAGGATAATCTATTTAATCGTATATTAATAATTGTAGTAATGAAATTAATAGCTCCTAAAATAGAAGAAATTCCTGCTAAATGAAGGGAAAAAATAGCAAGATCTACTGATCTTCCACCATGTGCAATATTAGATGAAAGTGGGGGGTACACTGTTCATCCTGTTCCTGCTCCATTTTCTACAATTCTTCTTGAAATTAAAAGAGTTAATGAGGGGGGAAGAAGTCAGAAACTTATATTGTTT…
Run 4, Sample 84	LCO1490 + HCO2198	CTmin	-3.85	6	Animalia	Arthropoda	Insecta	Lepidoptera	Noctuidae	Eurois	Eurois occulta	AAAAGTTGAATAAATAGGGGTCTCCTCCTCCCGCAGGGTCAAAAAAAGATGTATTTAAATTTCGATCTGTTAAAAGTATAGTAATAGCTCCAGCTAAAACAGGTAAAGATAATAATAATAAAAAAGCAGTAATTCCTACTGCTCAAATAAATAATGGTATTTGATCAAAGGATAATCTATTTAATCGTATATTAATAATTGTAGTAATGAAATTAATAGCTCCTAAAATAGAAGAAATTCCTGCTAAATGAAGGGAAAAAATAGCAAGATCTACTGATCTTCCACCATGTGCAATATTAGATGAAAGTGGGGGGTACACTGTTCATCCTGTTCCTGCTCCATTTTCTACAATTCTTCTTGAAATTAAAAGAGTTAATGAGGGGGGAAGAAGTCAGAAAC…
Run 5, Sample 23	LCO1490 + HCO2198	CTmax	42.63	6.3	Animalia	Arthropoda	Insecta	Lepidoptera	Noctuidae	Eurois	Eurois occulta	AAAAATGTTGATTAAATAGGGGTCTCCTCCTCCCGCAGGGTCAAAAAAAGATGTATTTAAATTTCGATCTGTTAAAAGTATAGTAATAGCTCCAGCTAAAACAGGTAAAGATAATAATAATAAAAAAGCAGTAATTCCTACTGCTCAAATAAATAATGGTATTTGATCAAAGGATAATCTATTTAATCGTATATTAATAATTGTAGTAATGAAATTAATAGCTCCTAAAATAGAAGAAATTCCTGCTAAATGAAGGGAAAAAATAGCAAGATCTACTGATCTTCCACCATGTGCAATATTAGATGAAAGTGGGGGGTACACTGTTCATCCTGTTCCTGCTCCATTTTCTACAATTCTTCTTGAAATTAAAAGAGTTAATGAGGGGGGAAGAAGTCAGAA…
Run 5, Sample 36	LCO1490 + HCO2198	CTmax	44.4	8	Animalia	Arthropoda	Insecta	Lepidoptera	Noctuidae	Eurois	Eurois occulta	AAGTTGATTAAATAGGGGTCTCCTCCTCCCGCAGGGTCAAAAAAAGATGTATTTAAATTTCGATCTGTTAAAAGTATAGTAATAGCTCCAGCTAAAACAGGTAAAGATAATAATAATAAAAAAGCAGTAATTCCTACTGCTCAAATAAATAATGGTATTTGATCAAAGGATAATCTATTTAATCGTATATTAATAATTGTAGTAATGAAATTAATAGCTCCTAAAATAGAAGAAATTCCTGCTAAATGAAGGGAAAAAATAGCAAGATCTACTGATCTTCCACCATGTGCAATATTAGATGAAAGTGGGGGGTACACTGTTCATCCTGTTCCTGCTCCATTTTCTACAATTCTTCTTGAAATTAAAAGAGTTAATGAGGGGGGAAGAAGTCAGAAACTT…
Run 6, Sample 28	LCO1490 + HCO2198	CTmax	44.42	4.9	Animalia	Arthropoda	Insecta	Lepidoptera	Noctuidae	Eurois	Eurois occulta	AATTAAATAGGGGTCTCCTCCTCCCGCAGGGTCAAAAAAAGATGTATTTAAATTTCGATCTGTTAAAAGTATAGTAATAGCTCCGGCTAAAACAGGTAAAGATAATAATAATAAAAAAGCAGTAATTCCTACTGCTCAAATAAATAATGGTATTTGATCAAAGGATAATCTATTTAATCGTATATTAATAATTGTAGTAATGAAATTAATAGCTCCTAAAATAGAAAAAATTCCTGCTAAATGAAGGGAAAAAATAGCAAGATCTACTGATCTTCCACCATGTGCAATATTAGATGAAAGTGGGGGGTACACTGTTCATCCTGTTCCTGCTCCATTTTCTACAATTCTTCTTGAAATTAAAAGAGTTAATGAGGGGGGAAGAAGTCAGAAACTTATATT…
Run 6, Sample 3	LCO1490 + HCO2198	CTmax	44.06	4.7	Animalia	Arthropoda	Insecta	Lepidoptera	Noctuidae	Eurois	Eurois occulta	AATTAAAATAGGGGTCTCCTCCTCCCGCAGGGTCAAAAAAAGATGTATTTAAATTTCGATCTGTTAAAAGTATAGTAATAGCTCCAGCTAAAACAGGTAAAGATAATAATAATAAAAAAGCAGTAATTCCTACCGCTCAAATAAATAATGGTATTTGATCAAAGGATAATCTATTTAATCGTATATTAATAATTGTAGTAATGAAATTAATAGCTCCTAAAATAGAAGAAATTCCTGCTAAATGAAGGGAAAAAATAGCAAGATCTACTGATCTTCCACCATGTGCAATATTAGATGAAAGTGGGGGGTACACTGTTCATCCTGTTCCTGCTCCATTTTCTACAATTCTTCTTGAAATTAAAAGAGTTAATGAGGGGGGAAGAAGTCAGAAACTTATAT…
Run 6, Sample 48	LCO1490 + HCO2198	CTmax	43.51	4.8	Animalia	Arthropoda	Insecta	Lepidoptera	Noctuidae	Eurois	Eurois occulta	AAAAAAGTTGATAAAATAGGGTCTCCTCCTCCCGCAGGGTCAAAAAAAGATGTATTTAAATTTCGATCTGTTAAAAGTATAGTAATAGCTCCAGCTAAAACAGGTAAAGATAATAATAATAAAAAAGCAGTAATTCCTACTGCTCAAATAAATAATGGTATTTGATCAAAGGATAATCTATTTAATCGTATATTAATAATTGTAGTAATGAAATTAATAGCTCCTAAAATAGAAGAAATTCCTGCTAAATGAAGGGAAAAAATAGCAAGATCTACTGATCTTCCACCATGTGCAATATTAGATGAAAGTGGGGGGTACACTGTTCATCCTGTTCCTGCTCCATTTTCTACAATTCTTCTTGAAATTAAAAGAGTTAATGAGGGGGGAAGAAGTCAGAAA…
Run 6, Sample 80	LCO1490 + HCO2198	CTmax	42.62	4.7	Animalia	Arthropoda	Insecta	Lepidoptera	Noctuidae	Eurois	Eurois occulta	ATTAAAATAGGGGTCTCCTCCTCCCGCAGGGTCAAAAAAAGATGTATTTAAATTTCGATCTGTTAAAAGTATAGTAATAGCTCCAGCTAAAACAGGTAAAGATAATAATAATAAAAAAGCAGTAATTCCTACTGCTCAAATAAATAATGGTATTTGATCAAAGGATAATCTATTTAATCGTATATTAATAATTGTAGTAATGAAATTAATAGCTCCTAAAATAGAAGAAATTCCTGCTAAATGAAGGGAAAAAATAGCAAGATCTACTGATCTTCCACCATGTGCAATATTAGATGAAAGTGGGGGGTACACTGTTCATCCTGTTCCTGCTCCATTTTCTACAATTCTTCTTGAAATTAAAAGAGTTAATGAGGGGGGAAGAAGTCAGAAACTTATATT…
Run 6, Sample 84	LCO1490 + HCO2198	CTmax	42.91	5	Animalia	Arthropoda	Insecta	Lepidoptera	Noctuidae	Eurois	Eurois occulta	TGTTGAATTAAAATAGGATCTCCTCCTCCCGCAGGGATCAAAAAAAGATGTATTTAAATTTCGATCTGTTAAAAGTATAGTAATAGCTCCAGCTAAAACAGGTAAAGATAATAATAATAAAAAAGCAGTAATTCCTACTGCTCAAATAAATAATGGTATTTGATCAAAGGATAATCTATTTAATCGTATATTAATAATTGTAGTAATGAAATTAATAGCTCCTAAAATAGAAGAAATTCCTGCTAAATGAAGGGAAAAAATAGCAAGATCTACTGATCTTCCACCATGTGCAATATTAGATGAAAGTGGGGGGTACACTGTTCATCCTGTTCCTGCTCCATTTTCTACAATTCTTCTTGAAATTAAAAGAGTTAATGAGGGGGGAAGAAGTCAGAAACT…
Run 4, Sample 60	LCO1490 + HCO2198	CTmin	0.58	8	Animalia	Arthropoda	Insecta	Lepidoptera	Noctuidae	Mniotype	Mniotype adusta	AGGTTGGTTAAATTGGGATCTCCTCCTCCAGCAGGGTCAAAAAGGATGTATTTAAATTTCGATCAGTTAATAATATAGTAATAGCTCCTGCTAAAACTGGGAGAGATAATAATAATAAAAACGCAGTAATTCCAACAGCTCAAATAAATAAAGGTATTTGATCAAAAGATAGGCTATTTAATCGTATATTAATAATTGTTGTAATAAAATTAATAGCACCTAAAATAGATGAAATTCCAGCTAAATGAAGGGAAAAAATAGCTAGATCTACAGAGCTACCTCCATGGGCAATATTAGAAGACAGTGGGGGGTACACTGTTCATCCAGTTCCTGCTCCATTTTCTACGATTCTTCTTGAAATTAATAAAGTTAAAGAAGGAGGGAGTAACCAAAAACTTA…
Run 5, Sample 105	LCO1490 + HCO2198	CTmax	43.6	11	Animalia	Arthropoda	Insecta	Lepidoptera	Noctuidae	Mniotype	Mniotype adusta	GGTGGGTAAAATTGGGATCCCCTCCTCCAGCAGGGTCAAAAAAGGATGTATTTAAATTTCGATCAGTTAATAATATAGTAATAGCTCCTGCTAAAACTGGGAGAGATAATAATAATAAAAACGCAGTAATTCCAACAGCTCAAATAAATAAAGGTATTTGATCAAAAGATAGGCTATTTAATCGTATATTAATAATTGTTGTAATAAAATTAATAGCACCTAAAATAGATGAAATTCCAGCTAAATGAAGGGAAAAAATAGCTAGATCTACAGAGCTACCTCCATGGGCAATATTAGAAGACAGTGGGGGGTACACTGTTCATCCAGTTCCTGCTCCATTTTCTACGATTCTTCTTGAAATTAATAAAGTTAAAGAAGGAGGGAGTAATCAAAAACTTA…
Run 5, Sample 111	LCO1490 + HCO2198	CTmax	44.78	13	Animalia	Arthropoda	Insecta	Lepidoptera	Noctuidae	Mniotype	Mniotype adusta	GTGGGTTAAAATTGGGATCTCCTCCTCCAGCAGGGTCAAAAAAGGATGTATTTAAATTTCGATCAGTTAATAATATAGTAATAGCTCCTGCTAAAACTGGGAGAGATAATAATAATAAAAACGCAGTAATTCCAACAGCTCAAATAAATAAAGGTATTTGATCAAAAGATAGGCTATTTAATCGTATATTAATAATTGTTGTAATAAAATTAATAGCACCTAAAATAGATGAAATTCCAGCTAAATGAAGGGAAAAAATAGCTAGATCTACAGAGCTACCTCCATGGGCAATATTAGAAGACAGTGGGGGGTACACTGTTCATCCAGTTCCTGCTCCATTTTCTACGATTCTTCTTGAAATTAATAAAGTTAAAGAAGGAGGGAGTAATCAAAAACTTA…
Run 5, Sample 57	LCO1490 + HCO2198	CTmax	43.18	16	Animalia	Arthropoda	Insecta	Lepidoptera	Noctuidae	Mniotype	Mniotype adusta	TAAATTGCGATCTCCTCCTCCAGCAGGGTCAAAAAAGGATGTATTTAAATTTCGATCAGTTAATAATATAGTAATAGCTCCTGCTAAAACTGGGAGAGATAATAATAATAAAAACGCAGTAATTCCAACAGCTCAAATAAATAAAGGTATTTGATCAAAAGATAGGCTATTTAATCGTATATTAATAATTGTTGTAATAAAATTAATAGCACCTAAAATAGATGAAATTCCAGCTAAATGAAGGGAAAAAATAGCTAGATCTACAGAGCTACCTCCATGGGCAATATTAGAAGACAGTGGGGGGTACACTGTTCATCCAGTTCCTGCTCCATTTTCTACGATTCTTCTTGAAATTAATAAAGTTAAAGAAGGAGGGAGTAATCAAAAACTTATATTATT…
Run 5, Sample 61	LCO1490 + HCO2198	CTmax	36.79	19	Animalia	Arthropoda	Insecta	Lepidoptera	Noctuidae	Mniotype	Mniotype adusta	GGTTGGGTAAAATTGGGATCTCCTCCTCCAGCAGGGTCAAAAAAGGATGTATTTAAATTTCGATCAGTTAATAATATAGTAATAGCTCCTGCTAAAACTGGGAGAGATAATAATAATAAAAACGCAGTAATTCCAACAGCTCAAATAAATAAAGGTATTTGATCAAAAGATAGGCTATTTAATCGTATATTAATAATTGTTGTAATAAAATTAATAGCACCTAAAATAGATGAAATTCCAGCTAAATGAAGGGAAAAAATAGCTAGATCTACAGAGCTACCTCCATGGGCAATATTAGAAGACAGTGGGGGGTACACTGTTCATCCAGTTCCTGCTCCATTTTCTACGATTCTTCTTGAAATTAATAAAGTTAAAGAAGGAGGGAGTAATCAAAAACTT…
Run 5, Sample 38	LCO1490 + HCO2198	CTmax	32.65	6.2	Animalia	Arthropoda	Insecta	Lepidoptera	Scythrididaw	Scythris	Scythris noricella	AGTTGATATTAAATAGGGGTCACCCCCACCGGGCAGGATCAAAAAAAGATGTATTTAAATTACGATCTGTTAATAATATAGTAATAGCACCAGCTAATACTGGTAAAGATAATAGTAAAAGTAGGGCAGTAATACCAACAGCTCATACGAATAAAGGTATTTGATCGAATGATATATTATTAATTCGTATATTAATAATAGTAGTAATAAAATTAATAGCTCCTAAAATAGAAGAAATTCCCGCTAAATGTAGGGAGAAAATAGCTAAATCAACTGATCTACCTCTATGGGCAATATTAGAGGAAAGAGGGGGGTATACAGTTCATCCAGTTCCTGCTCCGTTTTCTACAATACTACTTGAAATTAATAAAGTTAATGAGGGGGGTAATAATCAAAATC…
Run 6, Sample 108	LCO1490 + HCO2198	CTmax	50.44	6	Animalia	Arthropoda	Insecta	Lepidoptera	Scythrididaw	Scythris	Scythris noricella	AATTAAATAGGGGTCACCCCCACCGGGCAGGATCAAAAAAAGATGTATTTAAATTACGATCTGTTAATAATATAGTAATAGCACCAGCTAATACTGGTAAAGATAATAGTAAAAGTAGGGCAGTAATACCAACAGCTCATACGAATAAAGGTATTTGATCGAATGATATATTATTAATTCGTATATTAATAATAGTAGTAATAAAATTAATAGCTCCTAAAATAGAAGAAATTCCCGCTAAATGTAGGGAGAAAATAGCTAAATCAACTGATCTACCTCTATGGGCAATATTAGAGGAAAGAGGGGGGTATACAGTTCATCCAGTTCCTGCTCCGTTTTCTACAATACTACTTGAAATTAATAAAGTTAATGAGGGGGGTAATAATCAAAATCTTATAT…
Run 5, Sample 56	LCO1490 + HCO2198	CTmax	46.09	18	Animalia	Arthropoda	Insecta	Lepidoptera	Noctuidae	Spaelotis	Spaelotis clandestina	TATTAAATAGGATCTCCTCCTCCTGCTGGATCAAAAAAAGATGTATTTAAATTTCGATCTGTTAAAAGTATAGTAATAGCTCCAGCTAATACAGGTAATGATAATAATAATAAAAATGCAGTAATTCCTACTGCTCAAATAAATAATGGTATTTGATCAAATGATAAACTATTTAATCGTATATTAATAATTGTAGTAATAAAATTAATAGCTCCTAAAATAGAAGAAATTCCAGCTAAATGAAGGGAGAAAATAGCAAGATCTACTGATCTTCCTCCATGGGCAATATTAGATGAAAGTGGGGGGTACACTGTTCATCCTGTTCCTGCTCCATTTTCTACAATTCTTCTTGAAATTAAAAGAGTTAATGAGGGGGGAAGAAGTCAAAAACTTATATTG…
Run 6, Sample 79	LCO1490 + HCO2198	CTmax	45.17	3.6	Animalia	Arthropoda	Insecta	Lepidoptera	Noctuidae	Syngrapha	Syngrapha borea	GGTTGGGTATAGATAGGGTCTCCACCCTCCAGCGGGGTCAAAAAAGGAGGTATTTAAATTACGATCTGTTAAAAGTATTGTAATTGCCCCTGCTAAAACGGGTAAGGAAAGTAATAAAAGAAAAGCTGTAATCCCAACAGCTCAAATAAATAAAGGTATTTGATCAAAAGATAATCTGTTTAATCGTATATTAATAATTGTAGTAATAAAGTTAATTGCTCCTAAAATTGATGAAATTCCGGCTAAGTGTAAAGAAAAAATTGCTAAATCAACGGATCTTCCTCCGTGAGCAATATTAGATGAAAGTGGGGGGTACACTGTTCATCCAGTACCAGCTCCATTTTCAACAATTCTTCTAGAAATTAGTAAAGTTAAAGACGGGGGTAAAAGTCAGAAACT…
Run 2, Sample 96	LCO1490 + HCO2198	CTmin			Animalia	Arthropoda	Insecta	Lepidoptera	Tortricidae	Zeiraphera	Zeiraphera fortunana	GGTGGGTAAAATTGGGGTCTCCACCCCCAGCAGGGTCAAAAATGATGTATTTAAATTTCGATCTGTTAATAATATAGTAATAGCACCTGCTAATACTGGTAATGAAAGAAGTAATAAAAGTGCTGTAATTCCTACAGCTCAAACAAATAGGGGTATTTGATCTAATGATATGTTATTTGGTCGTATATTGATAATAGTAGTAATAAAATTTACAGCTCCTAAAATTGATGAAATACCAGCTAAATGTAAAGAAAAAATAGCTAAGTCTACAGAACTTCCTCTGTGAGCAATATTAGATGAAAGTGGGGGGTATACTGTTCATCCTGTACCTGCTCCATTTTCTACAATTCTACTTGAAATTAGTAATATAATAGAGGGGGGTAAAAGTCAAAATCTTAT…
Run 6, Sample 13	LCO1490 + HCO2198	CTmax	42.29	5.8	Animalia	Arthropoda	Insecta	Neuroptera	Hemerobiidae	Hemerobius	Hemerobius ovalis	AATTAAATAGGATCTCCCTCCTCCTGCAGGATCGAAAAAAGATGTATTTAGGTTTCGATCTGTTAATAATATAGTGATAGCTCCTGCTAATACTGGAAGAGATAATAACAATAATAATGCTGTAATAACTACAGATCATACAAATAAAGGCATTCGGTCTAAAGTTATATAATTTAGTCGTATATTAATAACAGTAGTAATGAAATTTACTGCTCCTAAAATAGAGGATACCCCTGCTAAATGTAGGCTAAAAATAGCTAAATCAACTGATGCACCTGCATGGGCAATATTAGCAGATAAAGGAGGATAAACTGTTCATCCAGTTCCAGCTCCATTTTCTACTATACTTGAAGCTAAAAGTAATATTAAAGAAGGAGGAAGTATCCAAAAACTTATATT…
Run 4, Sample 81	BR2 + BF3	CTmin	-4.82	4.7	Animalia	Arthropoda	Insecta	Neuroptera	Hemerobiidae	Wesmaelius	Wesmaelius nervosus	TTTGGAAATTTCGGTCTGTTAATAATATTGTAATAGCCCCTGCTAATACAGGTAGAGATAATAATAATAATAAGGCAGTAATTACTACAGATCAAACAAATAAAGGTATACGGTCTAATGTTATATAATTTAATCGTATATTAATTACAGTAGTAATAAAATTAACCGCTCCTAAAATTGAAAATACCCCCGCTAAGTGTAGACTAAAAATTGCTAAATCAACAGAAGCTCCTGCATGAGCAATATTAGCTGAGAGTGGGGGGTAAACTGTTCATCCAGTACCAGCACCACTTTCTACTATTCTCGAGGCTAATAATAATATTAAAGATGGAGGTAATATTCAAAATCTTATATTATTTATTCGGGGAAAGGCTATGTCGGGGCAATATCAGCACCAAC…
Run 3, Sample 4	LCO1490 + HCO2198	CTmin	-5.27	7	Animalia	Arthropoda	Insecta	Trichoptera	Limnephilidae	Limnephilus	Limnephilus kennicotti	TTGAAATTAAATTGGGATCTCCCCCTCCTGAATGGGATCAAAAAAAGAAGTATTTAAATTACGATCTGTTAATAACATTGTAATAGCTCCGGCTAAAACTGGAAGAGAAAGAAGAAGAAGAAGAGCAGTAATAGCTACTGATCAAACAAATAGGGGAATTCGATCTAATGTTATTAAATTATTTCGTATATTTAATGTAGTAGAAATGAAGTTAATAGCTCCTAAGATAGAGGAAATTCCAGCTAAATGTAAGGAAAAAATTGAAATATCTACGGATCTTCCTGCGTGAGCTAAATTTCTTGATAAAGGGGGGTAAACAGTTCATCCCGTTCCTGTTCCGCTTTCAATTAGAGCTCTAATTAATAAAAGATTTAATGAGGGGGGTAGTAGTCAAAATCT…
Run 4, Sample 94	LCO1490 + HCO2198	CTmin	-4.19	10	Animalia	Arthropoda	Insecta	Trichoptera	Limnephilidae	Limnephilus	Limnephilus sp.	TAAAATGTTGGTTAAATTGGGATCTCCCCCACCAGATGGGTCAAAAAAAGAAGTATTTAAATTACGGTCTGTTAGTAGTATTGTAATAGCTCCTGCTAGAACTGGTAAAGAAAGAAGAAGAAGAAGAGCTGTAATAGCTACAGATCATACAAATAGGGGGATTCGATCTAATGTTATTAGGTTATTTCGTATATTTAATGTAGTAGAAATAAAATTAATAGCTCCTAAAATAGAAGAAATTCCTGCTAGATGTAAAGAAAAAATTGAAATATCTACGGATCTTCCTGCGTGAGCTAAATTTCTTGATAGGGGGGGATAAACTGTTCATCCTGTTCCTGTTCCTCTTTCAATTAGGGCTCTGATTAATAAAAGATTAAGAGAGGGGGGCAGTAGTCAGAA…
Run 3, Sample 3	LCO1490 + HCO2198	CTmin	-4.4	10	Animalia	Arthropoda	Insecta	Trichoptera	Limnephilidae	Limnephilus	Limnephilus sp.	AGTTGACCAACGGTCTGTTAGTAGTATTGTAATAGCTCCTGCTAGAACTGGTAAAGAAAGAAGAAGAAGAAGAGCTGTAATAGCTACAGATCATACAAATAGGGGGATTCGATCTAATGTTATTAGGTTATTTCGTATATTTAATGTAGTAGAAATAAAATTAATAGCTCCTAAAATAGAAGAAATTCCTGCTAGATGTAAAGAAAAAATTGAAATATCTACGGATCTTCCTGCGTGAGCTAAATTTCTTGATAGGGGGGGATAAACTGTTCATCCTGTTCCTGTTCCTCTTTCAATTAGGGCTCTGATTAATAAAAGATTAAGAGAGGGGGGCAGTAGTCAGAATCTTATATTATTTATTCGGGGGAAGGCTATATCTGGGGCTCCAATTATTAATGG…
Run 2, Sample 55	LCO1490 + HCO2198	CTmin	-2.24	1.1	Animalia	Arthropoda	Arachnida	Trombidiformes	Anystidae		Anystidae sp.	ATTTGTTAAGAGTATAGTAATAGCACCTGCTAAGACAGGTAATGACAACAATAATAAAACAGTTGTAATAAAAACAGATCAAACAAATAAAGGAATTTGTTCAAATCTTAAGTAAGGAGTTTTTATATTTATGATAGTAGTTATAAAATTAATAGCACCTAAAATAGAACTAATTCCAGCAAGATGTAATGAAAAAATAGTTAAATCTACAGATGCTCCTGAATGAGATATGTTATTAGATAACGGAGGATACACAGTTCATCCAGTCCCACTACCTTTTGAAGTAAATGCTGATGATATTAAAAGAGAAAGAGAAGGGGGTAATAATCAAAATCTTATATTATTTATACGAGGGAAAGCTATGTCTGGTGCTCCTATTATAATAGGAACTAATCAATT…	92.33 %
Run 2, Sample 56	LCO1490 + HCO2198	CTmin	3.12	0.8	Animalia	Arthropoda	Arachnida	Trombidiformes	Anystidae		Anystidae sp.	AAAAATGTTGATTAAATTGGGATCTCCTCCCCCAATTGGGTCAAAAAAGAAGTATTAAAATTACGATCTGTTAAGAGTATAGTAATAGCACCTGCTAAGACAGGTAATGACAACAATAATAAAACAGTAGTAATAAAAACAGATCAAACAAATAAAGGAATTTGTTCAAATCTTAAGTAAGGAGTTTTTATATTTATGATAGTAGTTATAAAATTAATAGCACCTAAAATAGAACTAATTCCAGCAAGATGTAATGAAAAAATAGTTAAATCTACAGATGCACCTGAATGAGATATGTTATTAGATAACGGTGGATACACAGTTCATCCAGTCCCACTACCTTTTGAAGTAAAAGCTGATAATATTAAAAGAGAAAGAGAAGGTGGTAATAATCAAAAT…	92.33 %
Run 4, Sample 72	LCO1490 + HCO2198	CTmin	-3.56	1.3	Animalia	Arthropoda	Arachnida	Trombidiformes	Anystidae		Anystidae sp.	AAAAAGGTTGAAATTAAATTGGGATCTCCTCCCCCAATTGGGTCAAAAAAAGAAGTATTAAAATTACGATCTGTTAAGAGTATAGTAATAGCACCTGCTAAGACAGGTAATGACAACAATAATAAAACAGTAGTAATAAAAACAGATCAGACAAATAAAGGAATTTGTTCAAATCTTAAGTAAGGAGTTTTTATATTTATGATAGTAGTTATAAAATTAATAGCACCTAAAATAGAACTAATTCCAGCAAGATGTAATGAAAAAATAGTTAAATCTACAGATGCACCTGAATGAGATATGTTATTAGATAACGGTGGATACACAGTTCATCCAGTCCCACTACCTTTTGAAGTAAAAGCTGATAATATTAAAAGAGAAAGAGAAGGTGGTAATAATCAA…	0.92
Run 4, Sample 75	LCO1490 + HCO2198	CTmin	-2.34	1.2	Animalia	Arthropoda	Arachnida	Trombidiformes	Anystidae		Anystidae sp.	AAAAGGTTGATTTAAATTGGGATCTCCTCCCCCAATTGGGTCAAAAAAAGAAGTATTAAAATTACGATCTGTTAAGAGTATAGTAATAGCACCTGCTAAGACAGGTAATGACAACAATAATAAAACAGTAGTAATAAAAACAGATCAGACAAATAAAGGAATTTGTTCAAATCTTAAGTAAGGAGTTTTTATATTTATGATAGTAGTTATAAAATTAATAGCACCTAAAATAGAACTAATTCCAGCAAGATGTAATGAAAAAATAGTTAAATCTACAGATGCACCTGAATGAGATATGTTATTAGATAACGGTGGATACACAGTTCATCCAGTCCCACTACCTTTTGAAGTAAAAGCTGATAATATTAAAAGAGAAAGAGAAGGTGGTAATAATCAAAA…	0.92
Run 6, Sample 98	LCO1490 + HCO2198	CTmax	40.22	1.1	Animalia	Arthropoda	Arachnida	Trombidiformes	Anystidae		Anystidae sp.	TGATATTAAAATTGGGATCTCCTCCCCCAATTGGGGTCAAAAAAAGAAGTATTAAAATTACGATCTGTTAAGAGTATAGTAATAGCACCTGCTAAGACAGGTAATGACAACAATAATAAAACAGTAGTAATAAAAACAGATCAGACAAATAAAGGAATTTGTTCAAATCTTAAGTAAGGAGTTTTTATATTTATGATAGTAGTTATAAAATTAATAGCACCTAAAATAGAACTAATTCCAGCAAGATGTAATGAAAAAATAGTTAAATCTACAGATGCACCTGAATGAGATATGTTATTAGATAACGGTGGATACACAGTTCATCCAGTCCCACTACCTTTTGAAGTAAAAGCTGATAATATTAAAAGAGAAAGAGAAGGTGGTAATAATCAAAATCTT…	92.32 %
30p2	LCO1490 + HCO2198	NA			Animalia	Arthropoda	Arachnida	Trombidiformes	Sperchontidae	Sperchon	Sperchon sp.	ATGTTGATTAAATTGGGATCTCCTCCTCCTGCTGGGTCAAAAATGATGTATTAAAGTTTCGGTCTGTTAAAAGTATAGTAATAGCTCCTGCTAAGACTGGTAGAGAAAGTAGCAAAAGTACAGTTGTAATAAAAATAGATCAAACAAATAATGGAATCTGTTCTATTTTTATAGAAGTTGGTTTTATATTTAAAATAGTTGCTATAAAGTTAATTGCTCCTAAAATAGAAGAAATTCCCGCTAAATGTAAGGAAAAAATGGTTAGATCTACAGATGGTCCTGCATGGGCTAAGTTTCCTGATAAAGGAGGATAAACTGTTCATCCTGTTCCGGCTCCTATTGATGTAAAGGATCTAGTTAGTAATAAAATTAAGGCTGGTGGTAGAAGTCAAAATCTCA…
